# Supplementary material
Source: publisher figshare collection journal article supplement (https://gsajournals.figshare.com/ndownloader/files/22752644)
Supplement: Supplementary file 1 [file 22752644]

Archive with 5 entries (5 files):
- Supplementary_information_1_Arabidopsis_cmiPs.xlsx
- Supplementary_information_2_All_cmiPs.xlsx
- Supplementary_information_3_ReviGO.xlsx
- Supplementary_information_4_Conserved_Rice_miPs.xlsx
- Supplementary figure 1.pdf
