# Supplementary material
Source: publisher figshare collection journal article supplement (https://gsajournals.figshare.com/ndownloader/files/22752644)
Supplement: Supplementary file 1 [file 22752644 › Supplementary figure 1.pdf]

**A**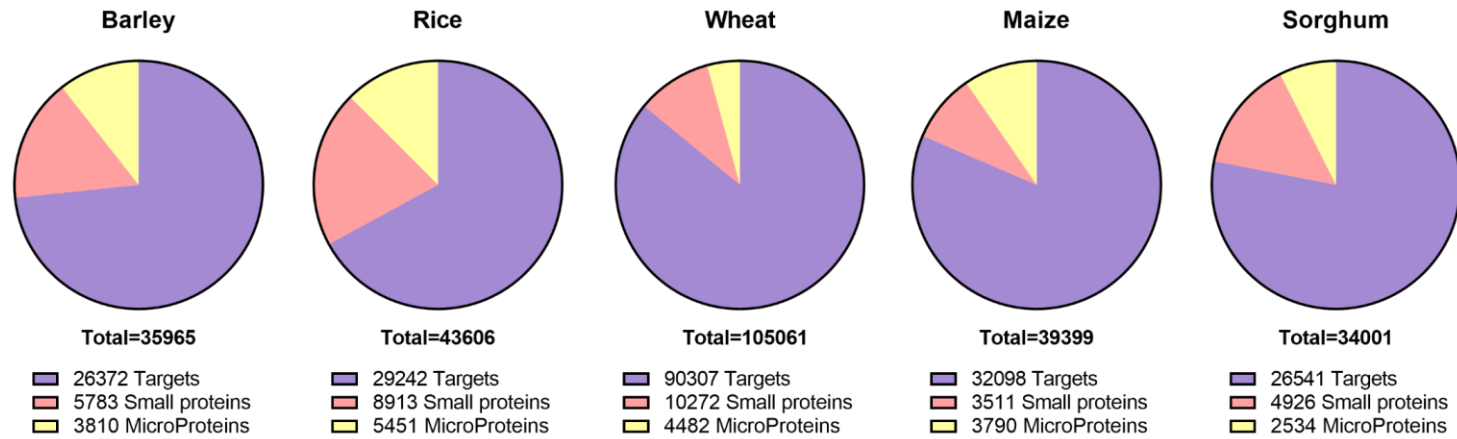**B**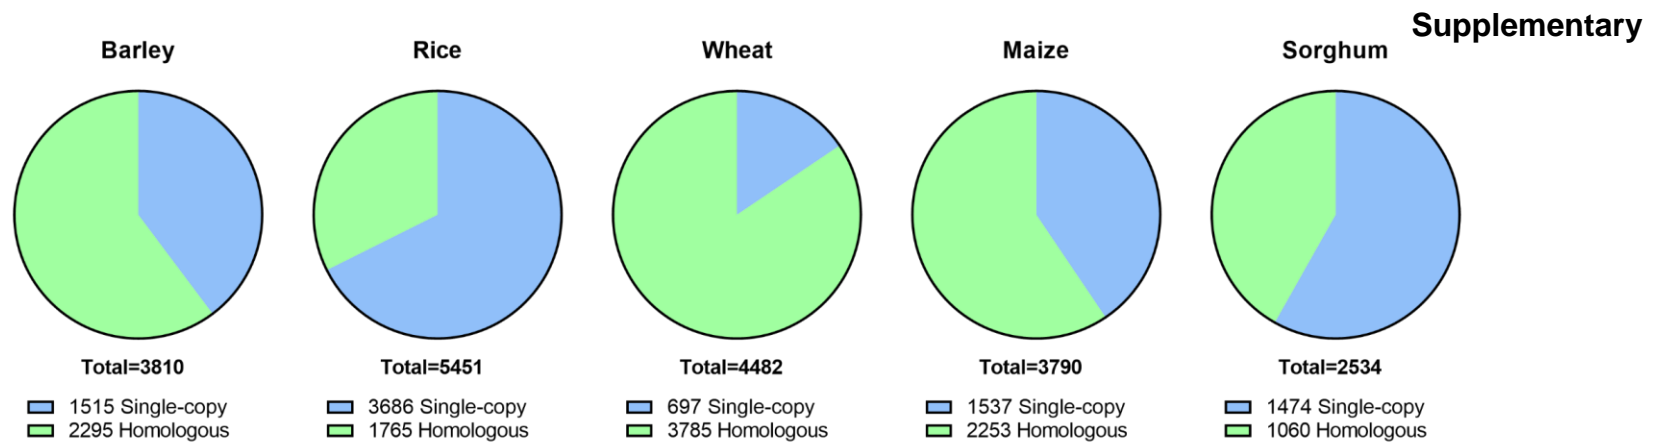

**Supplementary figure 1. A)** Breakdown of analyzed crop proteomes into all identified targets, small proteins and microProteins. Total refers to the total number of proteins in the respective proteomes. **B)** Breakdown of analyzed proteomes into single-copy (no identified homologues present in the same proteome) and homologous (presence of identified homologues) microProteins. Total refers to the total number of identified microProteins in the respective proteomes.
