# Supplementary material
Source: publisher figshare collection journal article supplement (https://gsajournals.figshare.com/ndownloader/files/22752644)
Supplement: Supplementary file 1 [file 22752644 › Supplementary_information_1_Arabidopsis_cmiPs.xlsx]

## Sheet: athaliana_final_results
ACCESSION_NAME	MIP_TYPE	LENGTH	SCORE	INSTABILITY_INDEX	INSTABILITY_INDEX*SCORE	HOMOLOGUES	DESCRIPTION	GENE_ONTOLOGY	ANCESTORS	ANCESTOR_INTERPRO_DOMAINS	ANCESTOR_GO_DOMAINS
Q9M157.1	Known MIP	75	393.812	77.4627	267.148	Q9LNI5.1(105.6);O22059.1(94.7);Q8GV05.1(92.0);Q84RD1.1(81.3);D3GKW6.1(80.7);B3H4X8.1(80.6);Q9FNV8.1(44.1);	MYB-like transcription factor ETC3	DNA-binding transcription factor activity;nucleus;response to salt stress;response to abscisic acid;response to salicylic acid;response to jasmonic acid;trichome differentiation;vegetative to reproductive phase transition of meristem;cell differentiation;sequence-specific DNA binding;transcription regulatory region DNA binding;root hair cell differentiation;	Q9FE25.1(117.2);Q9ZTC3.1(113.8);Q9FNV9.1(112.7);Q9SEI0.1(98.7);Q96276.1(95.1);Q9LTF7.1(94.9);P27900.2(94.1);Q38850.1(94.0);Q9S9K9.1(86.2);Q9FJA2.1(86.1);	Homeobox-like domain superfamily;Myb domain;Myb-like transcription factor;SANT/Myb domain;	ATP binding;DNA binding;DNA-binding transcription factor activity;anthocyanin-containing compound biosynthetic process;cell differentiation;cell fate commitment;cell fate specification;cinnamic acid biosynthetic process;fatty acid biosynthetic process;flavonoid biosynthetic process;gibberellic acid mediated signaling pathway;jasmonic acid mediated signaling pathway;mucilage biosynthetic process i…
Q9LJW5.1	Known MIP	100	279.13	86.722	234.991	Q9CA51.1(116.3);Q2Q493.1(107.2);	Mini zinc finger protein 2	DNA binding;nucleus;cytoplasm;floral meristem determinacy;plant-type ovary development;protein homodimerization activity;metal ion binding;	Q9ZPW7.1(99.8);Q9FRL5.1(97.2);Q9SB61.1(96.9);Q9M9S0.1(92.4);Q9FKP8.1(91.0);Q9SVL0.1(88.9);O64722.1(88.2);Q9LHF0.1(81.3);Q9SEZ1.1(79.0);Q9LXG0.1(78.6);	Homeobox domain;Homeobox-like domain superfamily;Homeodomain, ZF-HD class;ZF-HD homeobox protein, Cys/His-rich dimerisation domain;Zinc finger C2H2-type;	DNA binding;DNA-binding transcription factor activity;abscisic acid-activated signaling pathway;embryo development ending in seed dormancy;glucosinolate metabolic process;long-day photoperiodism, flowering;metal ion binding;nucleus;positive regulation of transcription, DNA-templated;protein homodimerization activity;regulation of gibberellin biosynthetic process;regulation of transcription, DNA-t…
O22059.1	Known MIP	94	232.869	110.627	228.931	Q8GV05.1(109.7);Q9M157.1(95.7);Q9LNI5.1(93.1);Q84RD1.1(89.9);B3H4X8.1(82.0);D3GKW6.1(78.3);Q9FNV8.1(42.1);	Transcription factor CPC	DNA-binding transcription factor activity;nucleus;response to salicylic acid;response to jasmonic acid;epidermal cell differentiation;positive regulation of trichoblast fate specification;stomatal complex formation;cell differentiation;sequence-specific DNA binding;transcription regulatory region DNA binding;	Q9FE25.1(117.2);Q9ZTC3.1(113.8);Q9FNV9.1(112.7);Q9SEI0.1(98.7);Q96276.1(95.1);Q9LTF7.1(94.9);P27900.2(94.1);Q38850.1(94.0);Q9S9K9.1(86.2);Q9FJA2.1(86.1);	Homeobox-like domain superfamily;Myb domain;Myb-like transcription factor;SANT/Myb domain;	ATP binding;DNA binding;DNA-binding transcription factor activity;anthocyanin-containing compound biosynthetic process;cell differentiation;cell fate commitment;cell fate specification;cinnamic acid biosynthetic process;fatty acid biosynthetic process;flavonoid biosynthetic process;gibberellic acid mediated signaling pathway;jasmonic acid mediated signaling pathway;mucilage biosynthetic process i…
D3GKW6.1	Known MIP	84	310.624	72.1381	171.853	B3H4X8.1(133.0);Q84RD1.1(118.1);Q8GV05.1(112.0);Q9LNI5.1(81.9);Q9M157.1(81.6);O22059.1(78.6);Q9FNV8.1(32.8);	MYB-like transcription factor TCL1	DNA-binding transcription factor activity;nucleus;regulation of transcription, DNA-templated;multicellular organism development;cell differentiation;sequence-specific DNA binding;transcription regulatory region DNA binding;regulation of trichome morphogenesis;	Q9FE25.1(117.2);Q9ZTC3.1(113.8);Q9FNV9.1(112.7);Q9SEI0.1(98.7);Q96276.1(95.1);Q9LTF7.1(94.9);P27900.2(94.1);Q38850.1(94.0);Q9S9K9.1(86.2);Q9FJA2.1(86.1);	Homeobox-like domain superfamily;Myb domain;Myb-like transcription factor;SANT/Myb domain;	ATP binding;DNA binding;DNA-binding transcription factor activity;anthocyanin-containing compound biosynthetic process;cell differentiation;cell fate commitment;cell fate specification;cinnamic acid biosynthetic process;fatty acid biosynthetic process;flavonoid biosynthetic process;gibberellic acid mediated signaling pathway;jasmonic acid mediated signaling pathway;mucilage biosynthetic process i…
Q9M0U2.1	Homologous	132	339.201	68.5818	157.594	Q9SH13.1(60.3);Q3E9N2.1(50.4);	Putative F-box protein At4g05620		Q9FI70.1(119.0);Q9FI71.1(117.6);Q9SK64.1(115.4);Q9SVA1.1(114.5);Q9FFV4.1(113.3);Q9LU49.1(112.1);Q3E8Y7.1(111.6);Q9FI72.1(110.2);P0C2F9.1(109.2);Q8GXF6.1(108.9);	F-box domain;F-box-like domain superfamily;Kelch repeat type 1;Kelch repeat type 2;Kelch-type beta propeller;	cytosol;ubiquitin-dependent protein catabolic process;
Q9LNI5.1	Known MIP	83	319.225	69.1831	153.097	Q9M157.1(106.1);O22059.1(92.9);Q8GV05.1(90.0);Q84RD1.1(84.1);D3GKW6.1(81.5);B3H4X8.1(76.5);Q9FNV8.1(42.2);	MYB-like transcription factor ETC1	DNA-binding transcription factor activity;nucleus;cell differentiation;sequence-specific DNA binding;transcription regulatory region DNA binding;root hair cell development;negative regulation of trichome patterning;	Q9FE25.1(117.2);Q9ZTC3.1(113.8);Q9FNV9.1(112.7);Q9SEI0.1(98.7);Q96276.1(95.1);Q9LTF7.1(94.9);P27900.2(94.1);Q38850.1(94.0);Q9S9K9.1(86.2);Q9FJA2.1(86.1);	Homeobox-like domain superfamily;Myb domain;Myb-like transcription factor;SANT/Myb domain;	ATP binding;DNA binding;DNA-binding transcription factor activity;anthocyanin-containing compound biosynthetic process;cell differentiation;cell fate commitment;cell fate specification;cinnamic acid biosynthetic process;fatty acid biosynthetic process;flavonoid biosynthetic process;gibberellic acid mediated signaling pathway;jasmonic acid mediated signaling pathway;mucilage biosynthetic process i…
Q8GV05.1	Known MIP	106	158.227	93.4623	144.403	B3H4X8.1(119.4);Q84RD1.1(118.0);D3GKW6.1(111.9);O22059.1(109.5);Q9M157.1(93.0);Q9LNI5.1(90.4);Q9FNV8.1(38.1);	Transcription factor TRY	DNA-binding transcription factor activity;nucleus;regulation of transcription, DNA-templated;multicellular organism development;trichome branching;cell differentiation;sequence-specific DNA binding;transcription regulatory region DNA binding;	Q9FE25.1(117.2);Q9ZTC3.1(113.8);Q9FNV9.1(112.7);Q9SEI0.1(98.7);Q96276.1(95.1);Q9LTF7.1(94.9);P27900.2(94.1);Q38850.1(94.0);Q9S9K9.1(86.2);Q9FJA2.1(86.1);	Homeobox-like domain superfamily;Myb domain;Myb-like transcription factor;SANT/Myb domain;	ATP binding;DNA binding;DNA-binding transcription factor activity;anthocyanin-containing compound biosynthetic process;cell differentiation;cell fate commitment;cell fate specification;cinnamic acid biosynthetic process;fatty acid biosynthetic process;flavonoid biosynthetic process;gibberellic acid mediated signaling pathway;jasmonic acid mediated signaling pathway;mucilage biosynthetic process i…
Q3E9N2.1	Homologous	146	261.194	70.6068	134.559	Q9M0U2.1(49.2);Q9SH13.1(32.9);	Uncharacterized protein At4g39750		Q9FI70.1(119.0);Q9FI71.1(117.6);Q9SK64.1(115.4);Q9SVA1.1(114.5);Q9FFV4.1(113.3);Q9LU49.1(112.1);Q3E8Y7.1(111.6);Q9FI72.1(110.2);P0C2F9.1(109.2);Q8GXF6.1(108.9);	F-box domain;F-box-like domain superfamily;Kelch repeat type 1;Kelch repeat type 2;Kelch-type beta propeller;	cytosol;ubiquitin-dependent protein catabolic process;
Q1A173.1	Homologous	97	169.711	81.2443	128.1	Q8GW75.1(135.2);Q6NNN0.1(107.9);Q9SIJ5.1(107.6);F4JVB8.1(101.9);Q1G3C4.1(87.7);	Protein RADIALIS-like 6	DNA binding;DNA-binding transcription factor activity;nucleus;regulation of transcription, DNA-templated;	Q9FNN6.1(76.6);Q9ASQ2.1(35.7);Q6R0H0.1(21.7);Q6R0G4.1(21.7);Q8RWU3.1(21.6);C0SVG5.1(21.6);Q8H1P9.1(21.0);Q6R032.1(19.9);Q8H0W3.1(19.2);Q9SSA1.1(17.1);	Homeobox-like domain superfamily;Myb domain;Myb domain, plants;Myb-like domain;Myb-like transcription factor;SANT domain;SANT/Myb domain;	DNA binding;DNA-binding transcription factor activity;abscisic acid-activated signaling pathway;cellular response to DNA damage stimulus;circadian regulation of gene expression;circadian rhythm;cytoplasm;endoplasmic reticulum;endoplasmic reticulum membrane;gibberellic acid mediated signaling pathway;histone H3 acetylation;integral component of membrane;jasmonic acid mediated signaling pathway;neg…
B3H4X8.1	Known MIP	100	193.101	76.3551	126.237	D3GKW6.1(132.9);Q84RD1.1(127.2);Q8GV05.1(117.2);O22059.1(82.4);Q9M157.1(81.7);Q9LNI5.1(77.2);Q9FNV8.1(42.3);	MYB-like transcription factor TCL2	DNA-binding transcription factor activity;nucleus;cell differentiation;sequence-specific DNA binding;transcription regulatory region DNA binding;negative regulation of transcription, DNA-templated;trichome patterning;negative regulation of trichome patterning;	Q9FE25.1(117.2);Q9ZTC3.1(113.8);Q9FNV9.1(112.7);Q9SEI0.1(98.7);Q96276.1(95.1);Q9LTF7.1(94.9);P27900.2(94.1);Q38850.1(94.0);Q9S9K9.1(86.2);Q9FJA2.1(86.1);	Homeobox-like domain superfamily;Myb domain;Myb-like transcription factor;SANT/Myb domain;	ATP binding;DNA binding;DNA-binding transcription factor activity;anthocyanin-containing compound biosynthetic process;cell differentiation;cell fate commitment;cell fate specification;cinnamic acid biosynthetic process;fatty acid biosynthetic process;flavonoid biosynthetic process;gibberellic acid mediated signaling pathway;jasmonic acid mediated signaling pathway;mucilage biosynthetic process i…
Q9SD11.1	Single-copy	103	189.512	76.4806	124.429		Protein IQ-DOMAIN 20	calmodulin binding;nucleolus;plasma membrane;response to calcium ion;	Q9LKB9.1(23.7);Q9FYG2.1(21.6);F4K5J1.2(20.4);F4I507.1(19.5);F4K0A6.1(19.5);Q9M2K0.1(18.5);	Ankyrin repeat;Ankyrin repeat-containing domain;Ankyrin repeat-containing domain superfamily;CG-1 DNA-binding domain;Class XI myosin, cargo binding domain;Dilute domain;IPT domain;IQ motif, EF-hand binding site;Immunoglobulin E-set;Immunoglobulin-like fold;Kinesin motor domain superfamily;Myosin S1 fragment, N-terminal;Myosin head, motor domain;Myosin, N-terminal, SH3-like;P-loop containing nucle…	ATP binding;Golgi localization;actin binding;actin filament binding;actin filament organization;actin filament-based movement;calmodulin binding;cell division;cytoplasm;cytosol;endocytosis;endosome;fruit development;gynoecium development;leaf pavement cell development;mitochondrion localization;motor activity;myosin complex;nucleus;peroxisome localization;plasma membrane;plasmodesma;positive regu…
P93015.2	Single-copy	131	124.708	110.353	122.541		Squamosa promoter-binding-like protein 3	DNA binding;DNA-binding transcription factor activity;nucleus;cytoplasm;flower development;positive regulation of flower development;vegetative to reproductive phase transition of meristem;inflorescence development;regulation of vegetative phase change;cell differentiation;metal ion binding;	Q8RY95.3(116.6);	Ankyrin repeat-containing domain;Ankyrin repeat-containing domain superfamily;SBP domain;SBP domain superfamily;	DNA binding;DNA-binding transcription factor activity;cytoplasm;defense response to bacterium;metal ion binding;nucleus;plasma membrane;positive regulation of transcription, DNA-templated;regulation of transcription, DNA-templated;
F4JVB8.1	Homologous	100	162.54	79.387	116.839	Q9SIJ5.1(146.3);Q6NNN0.1(110.8);Q8GW75.1(106.2);Q1A173.1(101.5);Q1G3C4.1(98.7);	Protein RADIALIS-like 1	DNA binding;DNA-binding transcription factor activity;nucleus;	Q9FNN6.1(76.6);Q9ASQ2.1(35.7);Q6R0H0.1(21.7);Q6R0G4.1(21.7);Q8RWU3.1(21.6);C0SVG5.1(21.6);Q8H1P9.1(21.0);Q6R032.1(19.9);Q8H0W3.1(19.2);Q9SSA1.1(17.1);	Homeobox-like domain superfamily;Myb domain;Myb domain, plants;Myb-like domain;Myb-like transcription factor;SANT domain;SANT/Myb domain;	DNA binding;DNA-binding transcription factor activity;abscisic acid-activated signaling pathway;cellular response to DNA damage stimulus;circadian regulation of gene expression;circadian rhythm;cytoplasm;endoplasmic reticulum;endoplasmic reticulum membrane;gibberellic acid mediated signaling pathway;histone H3 acetylation;integral component of membrane;jasmonic acid mediated signaling pathway;neg…
Q84RD1.1	Known MIP	112	128.031	85.6027	105.804	B3H4X8.1(127.1);D3GKW6.1(118.3);Q8GV05.1(117.7);O22059.1(90.0);Q9LNI5.1(84.5);Q9M157.1(82.2);Q9FNV8.1(39.2);	MYB-like transcription factor ETC2	DNA-binding transcription factor activity;nucleus;regulation of transcription, DNA-templated;cell differentiation;sequence-specific DNA binding;transcription regulatory region DNA binding;trichome patterning;root hair cell development;negative regulation of trichome patterning;	Q9FE25.1(117.2);Q9ZTC3.1(113.8);Q9FNV9.1(112.7);Q9SEI0.1(98.7);Q96276.1(95.1);Q9LTF7.1(94.9);P27900.2(94.1);Q38850.1(94.0);Q9S9K9.1(86.2);Q9FJA2.1(86.1);	Homeobox-like domain superfamily;Myb domain;Myb-like transcription factor;SANT/Myb domain;	ATP binding;DNA binding;DNA-binding transcription factor activity;anthocyanin-containing compound biosynthetic process;cell differentiation;cell fate commitment;cell fate specification;cinnamic acid biosynthetic process;fatty acid biosynthetic process;flavonoid biosynthetic process;gibberellic acid mediated signaling pathway;jasmonic acid mediated signaling pathway;mucilage biosynthetic process i…
O22704.1	Homologous	121	267.199	64.2968	96.5024	Q9FDW8.1(71.9);O48845.1(66.1);Q42342.2(62.0);Q9ZWT2.1(60.7);Q9ZNV4.1(49.7);	Cytochrome B5-like protein	integral component of membrane;heme binding;metal ion binding;	P11035.1(92.1);P11832.3(84.9);Q9ZRP7.1(65.7);Q3EBF7.1(62.8);	Cytochrome b5, heme-binding site;Cytochrome b5-like heme/steroid binding domain;Cytochrome b5-like heme/steroid binding domain superfamily;Eukaryotic molybdopterin oxidoreductase;FAD-binding domain, ferredoxin reductase-type;Fatty acid desaturase;Fatty acid desaturase domain;Ferredoxin-NADP reductase (FNR), nucleotide-binding domain;Flavoprotein pyridine nucleotide cytochrome reductase;Flavoprote…	FAD binding;cellular response to cold;cytosol;endoplasmic reticulum;endoplasmic reticulum membrane;heme binding;integral component of membrane;lipid metabolic process;metal ion binding;molybdenum ion binding;molybdopterin cofactor binding;nitrate assimilation;nitrate reductase (NADH) activity;nitrate reductase (NADPH) activity;nitrate reductase activity;nitric oxide biosynthetic process;nucleus;p…
Q1G3I2.1	Known MIP	117	158.991	73.288	92.4483	Q9LRM4.1(156.0);	B-box domain protein 30	nucleus;circadian rhythm;zinc ion binding;regulation of flower development;protein-macromolecule adaptor activity;	Q39057.1(65.5);O50055.1(65.0);Q9SK53.1(64.9);Q940T9.2(62.5);Q96502.1(61.1);O22800.2(51.1);	B-box-type zinc finger;CCT domain;	DNA binding;DNA-binding transcription factor activity;cell differentiation;chloroplast organization;far-red light signaling pathway;flower development;identical protein binding;nucleus;red light signaling pathway;regulation of flower development;regulation of photomorphogenesis;regulation of transcription, DNA-templated;response to far red light;sequence-specific DNA binding;transcription regulat…
Q8GW75.1	Homologous	100	162.54	70.998	85.3218	Q1A173.1(134.6);F4JVB8.1(105.9);Q9SIJ5.1(104.8);Q6NNN0.1(103.0);Q1G3C4.1(91.0);	Protein RADIALIS-like 5	DNA binding;nucleus;	Q9FNN6.1(76.6);Q9ASQ2.1(35.7);Q6R0H0.1(21.7);Q6R0G4.1(21.7);Q8RWU3.1(21.6);C0SVG5.1(21.6);Q8H1P9.1(21.0);Q6R032.1(19.9);Q8H0W3.1(19.2);Q9SSA1.1(17.1);	Homeobox-like domain superfamily;Myb domain;Myb domain, plants;Myb-like domain;Myb-like transcription factor;SANT domain;SANT/Myb domain;	DNA binding;DNA-binding transcription factor activity;abscisic acid-activated signaling pathway;cellular response to DNA damage stimulus;circadian regulation of gene expression;circadian rhythm;cytoplasm;endoplasmic reticulum;endoplasmic reticulum membrane;gibberellic acid mediated signaling pathway;histone H3 acetylation;integral component of membrane;jasmonic acid mediated signaling pathway;neg…
Q9CA51.1	Known MIP	102	266.392	61.7039	80.9107	Q2Q493.1(130.6);Q9LJW5.1(115.1);	Mini zinc finger protein 1	DNA binding;nucleus;cytoplasm;multicellular organism development;photomorphogenesis;response to auxin;response to cytokinin;response to abscisic acid;response to gibberellin;response to brassinosteroid;protein homodimerization activity;negative regulation of DNA binding;transcription regulatory region DNA binding;negative regulation of transcription, DNA-templated;metal ion binding;regulation of …	Q9ZPW7.1(99.8);Q9FRL5.1(97.2);Q9SB61.1(96.9);Q9M9S0.1(92.4);Q9FKP8.1(91.0);Q9SVL0.1(88.9);O64722.1(88.2);Q9LHF0.1(81.3);Q9SEZ1.1(79.0);Q9LXG0.1(78.6);	Homeobox domain;Homeobox-like domain superfamily;Homeodomain, ZF-HD class;ZF-HD homeobox protein, Cys/His-rich dimerisation domain;Zinc finger C2H2-type;	DNA binding;DNA-binding transcription factor activity;abscisic acid-activated signaling pathway;embryo development ending in seed dormancy;glucosinolate metabolic process;long-day photoperiodism, flowering;metal ion binding;nucleus;positive regulation of transcription, DNA-templated;protein homodimerization activity;regulation of gibberellin biosynthetic process;regulation of transcription, DNA-t…
Q2Q493.1	Known MIP	88	364.214	57.4602	80.8601	Q9CA51.1(129.1);Q9LJW5.1(107.2);	Mini zinc finger protein 3	nucleus;cytoplasm;multicellular organism development;protein homodimerization activity;metal ion binding;regulation of meristem development;	Q9ZPW7.1(99.8);Q9FRL5.1(97.2);Q9SB61.1(96.9);Q9M9S0.1(92.4);Q9FKP8.1(91.0);Q9SVL0.1(88.9);O64722.1(88.2);Q9LHF0.1(81.3);Q9SEZ1.1(79.0);Q9LXG0.1(78.6);	Homeobox domain;Homeobox-like domain superfamily;Homeodomain, ZF-HD class;ZF-HD homeobox protein, Cys/His-rich dimerisation domain;Zinc finger C2H2-type;	DNA binding;DNA-binding transcription factor activity;abscisic acid-activated signaling pathway;embryo development ending in seed dormancy;glucosinolate metabolic process;long-day photoperiodism, flowering;metal ion binding;nucleus;positive regulation of transcription, DNA-templated;protein homodimerization activity;regulation of gibberellin biosynthetic process;regulation of transcription, DNA-t…
Q9LRM4.1	Known MIP	121	149.032	71.0099	78.2753	Q1G3I2.1(155.2);	B-box domain protein 31	DNA-binding transcription factor activity;nucleus;regulation of transcription, DNA-templated;circadian rhythm;zinc ion binding;regulation of flower development;response to UV-B;protein-macromolecule adaptor activity;transcription regulatory region DNA binding;	Q39057.1(65.5);O50055.1(65.0);Q9SK53.1(64.9);Q940T9.2(62.5);Q96502.1(61.1);O22800.2(51.1);	B-box-type zinc finger;CCT domain;	DNA binding;DNA-binding transcription factor activity;cell differentiation;chloroplast organization;far-red light signaling pathway;flower development;identical protein binding;nucleus;red light signaling pathway;regulation of flower development;regulation of photomorphogenesis;regulation of transcription, DNA-templated;response to far red light;sequence-specific DNA binding;transcription regulat…
Q9SIJ5.1	Homologous	101	160.19	67.4832	70.0686	F4JVB8.1(146.1);Q1A173.1(107.1);Q6NNN0.1(106.8);Q8GW75.1(104.9);Q1G3C4.1(87.3);	Protein RADIALIS-like 2	DNA binding;DNA-binding transcription factor activity;nucleus;gravitropism;embryo development ending in seed dormancy;response to red light;	Q9FNN6.1(76.6);Q9ASQ2.1(35.7);Q6R0H0.1(21.7);Q6R0G4.1(21.7);Q8RWU3.1(21.6);C0SVG5.1(21.6);Q8H1P9.1(21.0);Q6R032.1(19.9);Q8H0W3.1(19.2);Q9SSA1.1(17.1);	Homeobox-like domain superfamily;Myb domain;Myb domain, plants;Myb-like domain;Myb-like transcription factor;SANT domain;SANT/Myb domain;	DNA binding;DNA-binding transcription factor activity;abscisic acid-activated signaling pathway;cellular response to DNA damage stimulus;circadian regulation of gene expression;circadian rhythm;cytoplasm;endoplasmic reticulum;endoplasmic reticulum membrane;gibberellic acid mediated signaling pathway;histone H3 acetylation;integral component of membrane;jasmonic acid mediated signaling pathway;neg…
Q3E6X9.1	Homologous	73	576.231	49.9493	68.3824	Q3E7S2.1(42.2);Q3EBJ8.1(36.4);	Putative F-box protein At1g47915		Q56XW8.2(111.9);Q9FM90.1(97.9);Q8L7H1.1(89.2);Q94B46.1(86.5);Q3E7K7.1(84.0);Q9LXR4.1(83.5);O23257.1(83.3);	F-box domain;F-box-like domain superfamily;FBD domain;Leucine-rich repeat 2;Leucine-rich repeat domain superfamily;
Q3E9H1.1	Single-copy	90	319.454	56.6311	66.4536		Putative F-box protein At5g16285		O04488.1(71.4);Q7X7A9.1(63.1);O80777.1(55.0);Q9LX89.1(53.4);Q9M9T0.1(47.8);Q9LPW2.2(41.4);Q9SAF4.1(38.5);Q9LPW4.1(35.8);Q9ZPS1.1(33.2);	F-box associated domain, type 1;F-box associated interaction domain;F-box domain;F-box-like domain superfamily;Galactose oxidase/kelch, beta-propeller;Kelch-type beta propeller;	heat acclimation;response to chitin;vacuolar membrane;
Q6NNN0.1	Homologous	81	211.164	61.9704	65.3325	Q1G3C4.1(113.6);F4JVB8.1(111.0);Q1A173.1(107.8);Q9SIJ5.1(107.0);Q8GW75.1(103.2);	Protein RADIALIS-like 3	DNA binding;DNA-binding transcription factor activity;nucleus;	Q9FNN6.1(76.6);Q9ASQ2.1(35.7);Q6R0H0.1(21.7);Q6R0G4.1(21.7);Q8RWU3.1(21.6);C0SVG5.1(21.6);Q8H1P9.1(21.0);Q6R032.1(19.9);Q8H0W3.1(19.2);Q9SSA1.1(17.1);	Homeobox-like domain superfamily;Myb domain;Myb domain, plants;Myb-like domain;Myb-like transcription factor;SANT domain;SANT/Myb domain;	DNA binding;DNA-binding transcription factor activity;abscisic acid-activated signaling pathway;cellular response to DNA damage stimulus;circadian regulation of gene expression;circadian rhythm;cytoplasm;endoplasmic reticulum;endoplasmic reticulum membrane;gibberellic acid mediated signaling pathway;histone H3 acetylation;integral component of membrane;jasmonic acid mediated signaling pathway;neg…
Q9CA46.1	Homologous	138	107.127	71.821	58.4272	Q9LZP8.1(45.4);Q9LQ65.1(42.0);Q9FGX2.1(32.3);	Basic leucine zipper 8	DNA binding;DNA-binding transcription factor activity;nucleus;protein homodimerization activity;	B9DGI8.1(66.3);Q9M1G6.1(61.6);P42774.2(58.2);O22763.2(57.4);Q9FUD3.1(54.7);Q501B2.1(54.7);	Basic leucine-zipper, C-terminal;Basic-leucine zipper domain;G-box binding protein, multifunctional mosaic region;	DNA binding;DNA-binding transcription factor activity;cellular response to abscisic acid stimulus;cellular response to glucose stimulus;cellular response to starvation;cytoplasm;entrainment of circadian clock;identical protein binding;kinase binding;nucleus;nutrient reservoir activity;plant-type hypersensitive response;positive regulation of seed maturation;positive regulation of transcription, D…
Q1G3C4.1	Homologous	77	222.414	58.6987	54.2995	Q6NNN0.1(113.2);F4JVB8.1(98.7);Q8GW75.1(90.9);Q1A173.1(87.3);Q9SIJ5.1(87.0);	Protein RADIALIS-like 4	DNA binding;nucleus;cytosol;	Q9FNN6.1(76.6);Q9ASQ2.1(35.7);Q6R0H0.1(21.7);Q6R0G4.1(21.7);Q8RWU3.1(21.6);C0SVG5.1(21.6);Q8H1P9.1(21.0);Q6R032.1(19.9);Q8H0W3.1(19.2);Q9SSA1.1(17.1);	Homeobox-like domain superfamily;Myb domain;Myb domain, plants;Myb-like domain;Myb-like transcription factor;SANT domain;SANT/Myb domain;	DNA binding;DNA-binding transcription factor activity;abscisic acid-activated signaling pathway;cellular response to DNA damage stimulus;circadian regulation of gene expression;circadian rhythm;cytoplasm;endoplasmic reticulum;endoplasmic reticulum membrane;gibberellic acid mediated signaling pathway;histone H3 acetylation;integral component of membrane;jasmonic acid mediated signaling pathway;neg…
O65381.1	Homologous	78	419.167	49.0718	46.0231	B9DHA6.1(73.7);Q42202.2(73.7);	NEDD8-like protein RUB3	nucleus;cytoplasm;modification-dependent protein catabolic process;regulation of proteolysis;protein tag;ubiquitin protein ligase binding;protein neddylation;	Q9ZPY9.1(72.7);Q9SGW8.2(56.2);Q9FNF8.1(53.2);Q9SU29.1(52.2);Q84L30.2(41.8);Q9SII9.2(36.8);Q84L31.2(36.0);Q84L32.2(35.9);	HECT domain;HECT, E3 ligase catalytic domain;Heat shock chaperonin-binding;Phosphatidylinositol 3-/4-kinase, catalytic domain;Protein kinase-like domain superfamily;UBA-like superfamily;UV excision repair protein Rad23;Ubiquilin;Ubiquitin domain;Ubiquitin-associated domain;Ubiquitin-like domain;Ubiquitin-like domain superfamily;XPC-binding domain;XPC-binding domain superfamily;	1-phosphatidylinositol 4-kinase activity;ATP binding;carbohydrate binding;cellular response to hypoxia;cytoplasm;cytosol;damaged DNA binding;kinase activity;leaf senescence;membrane;mitochondrion;nucleoplasm;nucleotide-excision repair;nucleus;peroxisome;phosphatidylinositol binding;phosphatidylinositol phosphorylation;plastid;polyubiquitin modification-dependent protein binding;positive regulatio…
Q9LPP4.1	Homologous	128	53.459	76.9688	35.6836	Q9LZ78.1(104.0);	Cyclin-dependent protein kinase inhibitor SMR1	protein kinase inhibitor activity;nucleus;cell cycle;positive regulation of DNA endoreduplication;defense response to bacterium;negative regulation of cell cycle;negative regulation of mitotic nuclear division;sepal giant cell development;	P30182.2(23.1);Q9CAE4.1(16.5);Q9SA65.1(13.3);	AP180 N-terminal homology (ANTH) domain;C-terminal associated domain of TOPRIM;DNA topoisomerase 2, TOPRIM domain;DNA topoisomerase, type IIA;DNA topoisomerase, type IIA, conserved site;DNA topoisomerase, type IIA, subunit A/ C-terminal, alpha-beta;DNA topoisomerase, type IIA, subunit A/C-terminal;DNA topoisomerase, type IIA, subunit B, C-terminal;DNA topoisomerase, type IIA, subunit B, domain 2;…	1-phosphatidylinositol binding;ATP binding;DNA binding;DNA topoisomerase activity;DNA topoisomerase type II (double strand cut, ATP-hydrolyzing) activity;DNA topological change;Golgi apparatus;RNA binding;SNARE binding;U12-type spliceosomal complex;clathrin coat assembly;clathrin heavy chain binding;clathrin-coated pit;clathrin-coated vesicle;clathrin-dependent endocytosis;developmental process;e…
Q3EBP0.1	Single-copy	69	501.953	44.2594	35.5517		Putative F-box protein At2g33705		Q9M2D0.1(67.3);O80758.1(59.9);P0C2G2.1(54.7);Q9SA02.1(53.0);Q9LM89.1(50.9);Q9FIH4.1(49.8);Q9SA03.1(49.8);Q3ECH0.3(49.2);Q9MAP1.2(49.1);Q9LV12.1(48.8);	F-box associated domain, type 3;F-box associated interaction domain;F-box domain;F-box-like domain superfamily;
O81208.1	Single-copy	110	78.1357	68.1064	35.3799		Light-harvesting complex-like protein OHP1, chloroplastic	plasma membrane;circadian rhythm;chloroplast;photosystem II;chloroplast thylakoid membrane;response to high light intensity;photosystem II assembly;integral component of membrane;chlorophyll binding;protein-chromophore linkage;	Q9XF91.1(34.7);P93735.1(22.0);Q94K66.1(21.3);O04921.1(19.5);Q9SYW8.1(18.3);P04778.1(15.9);P0CJ48.1(15.9);Q8VZ87.2(15.9);Q9XF87.1(14.2);Q9SY97.1(14.1);	Chlorophyll A-B binding protein;Chlorophyll A-B binding protein, plant;Chlorophyll a/b binding domain superfamily;Ferrochelatase;Ferrochelatase, C-terminal;Ferrochelatase, N-terminal;Ferrochelatase, active site;	PSII associated light-harvesting complex II;apoplast;cellular response to UV-A;cellular response to abscisic acid stimulus;cellular response to blue light;cellular response to far red light;cellular response to heat;cellular response to high light intensity;cellular response to red light;chlorophyll binding;chloroplast;chloroplast envelope;chloroplast membrane;chloroplast thylakoid;chloroplast th…
Q9S763.1	Homologous	147	154.612	57.4891	34.4031	Q9FYA2.1(152.3);Q8GY11.1(104.4);	Probable WRKY transcription factor 45	DNA-binding transcription factor activity;nucleus;phosphate ion transport;transcription factor binding;sequence-specific DNA binding;transcription regulatory region DNA binding;metal ion binding;	Q9SZ67.1(113.2);	Leucine-rich repeat 3;Leucine-rich repeat domain superfamily;NB-ARC;P-loop containing nucleoside triphosphate hydrolase;Paired amphipathic helix;Paired amphipathic helix superfamily;Protein kinase domain;Protein kinase-like domain superfamily;Toll/interleukin-1 receptor homology (TIR) domain superfamily;WRKY domain;WRKY domain superfamily;Winged helix DNA-binding domain superfamily;	ADP binding;ATP binding;DNA-binding transcription factor activity;chloroplast envelope;defense response;nucleus;protein serine/threonine kinase activity;sequence-specific DNA binding;transcription regulatory region DNA binding;
Q8LEF3.1	Single-copy	120	43.6643	81.6392	33.2741		Transcription elongation factor 1 homolog	RNA polymerase II complex binding;transcription elongation from RNA polymerase II promoter;transcription elongation factor complex;metal ion binding;chromatin-mediated maintenance of transcription;	Q8L9A0.1(17.2);Q9LU46.1(12.7);O48722.2(11.2);O23273.1(10.3);	Bromo adjacent homology (BAH) domain;C-5 cytosine methyltransferase;DEAD/DEAH box helicase domain;DNA (cytosine-5)-methyltransferase 1, replication foci domain;DNA (cytosine-5)-methyltransferase 1-like;DNA methylase, C-5 cytosine-specific, conserved site;DNA methylase, C-5 cytosine-specific, active site;Haem oxygenase (decyclizing), plant;Haem oxygenase-like;Haem oxygenase-like, multi-helical;Hel…	ATP binding;DNA (cytosine-5-)-methyltransferase activity;DNA binding;DNA mediated transformation;DNA methylation on cytosine within a CG sequence;RNA binding;RNA helicase activity;chloroplast;chromatin binding;chromatin organization;double fertilization forming a zygote and endosperm;embryo sac development;heme oxidation;heme oxygenase (decyclizing) activity;karyogamy;mRNA splicing, via spliceoso…
Q9SH13.1	Homologous	130	351.458	47.3923	33.1863	Q9M0U2.1(60.7);Q3E9N2.1(34.2);	Putative F-box protein At1g77880		Q9FI70.1(119.0);Q9FI71.1(117.6);Q9SK64.1(115.4);Q9SVA1.1(114.5);Q9FFV4.1(113.3);Q9LU49.1(112.1);Q3E8Y7.1(111.6);Q9FI72.1(110.2);P0C2F9.1(109.2);Q8GXF6.1(108.9);	F-box domain;F-box-like domain superfamily;Kelch repeat type 1;Kelch repeat type 2;Kelch-type beta propeller;	cytosol;ubiquitin-dependent protein catabolic process;
Q93VK8.1	Single-copy	86	54.7693	74.1244	32.9532		Root meristem growth factor 6	extracellular space;growth factor activity;positive regulation of cell population proliferation;positive gravitropism;root system development;cell differentiation;regulation of protein localization;lateral root development;regulation of auxin polar transport;	Q56WD3.2(14.7);Q8LG53.2(14.7);Q8VZF6.1(14.6);	Ion channel regulatory protein, UNC-93;MFS transporter superfamily;PH-like domain superfamily;Pleckstrin homology domain;Protein ENHANCED DISEASE RESISTANCE 2, C-terminal;START domain;START-like domain superfamily;	defense response;endoplasmic reticulum membrane;endosome membrane;integral component of membrane;lipid binding;plasma membrane;
Q9FMP4.1	Single-copy	124	438.712	44.4016	31.4856		Splicing factor 3B subunit 6-like protein	RNA binding;nucleus;mRNA processing;RNA splicing;	P42731.1(94.2);O22173.1(82.0);Q9FXA2.1(81.4);Q05196.3(80.0);O64380.1(77.9);Q9ZQA8.1(70.2);F4HT49.2(52.3);	Nucleotide-binding alpha-beta plait domain superfamily;PABC (PABP) domain;Paraneoplastic encephalomyelitis antigen;Polyadenylate binding protein, human types 1, 2, 3, 4;Polyadenylate-binding protein/Hyperplastic disc protein;RNA recognition motif domain;RNA recognition motif domain, eukaryote;RNA-binding domain superfamily;	RNA binding;cytoplasm;cytosol;mRNA 3'-UTR binding;mRNA binding;mRNA processing;mitochondrion;nuclear-transcribed mRNA catabolic process, nonsense-mediated decay;nuclear-transcribed mRNA poly(A) tail shortening;nucleus;plasma membrane;poly(A) binding;poly(U) RNA binding;regulation of nuclear-transcribed mRNA catabolic process, deadenylation-dependent decay;regulation of nuclear-transcribed mRNA po…
Q9LQ65.1	Homologous	148	89.1633	63.7818	31.1508	Q9CA46.1(41.2);Q9LZP8.1(40.1);Q9FGX2.1(39.9);	Basic leucine zipper 4	DNA-binding transcription factor activity;nucleus;sequence-specific DNA binding;transcription regulatory region DNA binding;positive regulation of transcription, DNA-templated;	B9DGI8.1(66.3);Q9M1G6.1(61.6);P42774.2(58.2);O22763.2(57.4);Q9FUD3.1(54.7);Q501B2.1(54.7);	Basic leucine-zipper, C-terminal;Basic-leucine zipper domain;G-box binding protein, multifunctional mosaic region;	DNA binding;DNA-binding transcription factor activity;cellular response to abscisic acid stimulus;cellular response to glucose stimulus;cellular response to starvation;cytoplasm;entrainment of circadian clock;identical protein binding;kinase binding;nucleus;nutrient reservoir activity;plant-type hypersensitive response;positive regulation of seed maturation;positive regulation of transcription, D…
P93290.1	Single-copy	111	153.084	56.0929	30.5087		Uncharacterized mitochondrial protein AtMg00240	mitochondrion;	Q94HW2.1(54.8);Q9ZT94.1(50.1);	GAG-pre-integrase domain;Integrase, catalytic core;Reverse transcriptase, RNA-dependent DNA polymerase;Ribonuclease H superfamily;Ribonuclease H-like superfamily;	DNA integration;DNA recombination;RNA-directed DNA polymerase activity;aspartic-type endopeptidase activity;endonuclease activity;metal ion binding;nucleic acid binding;
Q8LA14.2	Single-copy	81	37.0514	82.5457	28.8293		Putative phytosulfokines 6	extracellular region;multicellular organism development;growth factor activity;cell population proliferation;cell differentiation;	Q9SYS3.1(13.7);Q9XEC8.1(12.4);	Gnk2-homologous domain;Gnk2-homologous domain superfamily;Protein kinase domain;Protein kinase, ATP binding site;Protein kinase-like domain superfamily;Serine/threonine-protein kinase, active site;	ATP binding;integral component of membrane;plasma membrane;protein phosphorylation;protein serine/threonine kinase activity;
Q3E7S2.1	Homologous	83	789.077	36.6229	27.0652	Q3E6X9.1(42.4);	F-box protein At1g19070		Q56XW8.2(116.2);Q3E7K7.1(107.5);Q9LXS0.1(99.8);Q8L7H1.1(97.0);Q9LDJ9.1(96.9);Q3E8L4.1(96.7);O23257.1(96.2);Q94B46.1(95.6);Q9M8U4.1(94.4);Q9FF23.1(93.9);	F-box domain;F-box-like domain superfamily;FBD domain;Leucine-rich repeat 2;Leucine-rich repeat domain superfamily;
Q42342.2	Homologous	134	244.126	48.0881	24.5454	O48845.1(186.4);Q9ZWT2.1(174.2);Q9ZNV4.1(133.2);Q9FDW8.1(120.2);O22704.1(61.8);	Cytochrome b5 isoform E	vacuole;vacuolar membrane;endoplasmic reticulum;endoplasmic reticulum membrane;plasma membrane;chloroplast thylakoid membrane;plastid;membrane;integral component of membrane;heme binding;metal ion binding;oxidation-reduction process;	P11035.1(92.1);P11832.3(84.9);Q9ZRP7.1(65.7);Q3EBF7.1(62.8);	Cytochrome b5, heme-binding site;Cytochrome b5-like heme/steroid binding domain;Cytochrome b5-like heme/steroid binding domain superfamily;Eukaryotic molybdopterin oxidoreductase;FAD-binding domain, ferredoxin reductase-type;Fatty acid desaturase;Fatty acid desaturase domain;Ferredoxin-NADP reductase (FNR), nucleotide-binding domain;Flavoprotein pyridine nucleotide cytochrome reductase;Flavoprote…	FAD binding;cellular response to cold;cytosol;endoplasmic reticulum;endoplasmic reticulum membrane;heme binding;integral component of membrane;lipid metabolic process;metal ion binding;molybdenum ion binding;molybdopterin cofactor binding;nitrate assimilation;nitrate reductase (NADH) activity;nitrate reductase (NADPH) activity;nitrate reductase activity;nitric oxide biosynthetic process;nucleus;p…
F4IG60.1	Homologous	136	94.3237	59.4368	24.3367	Q9LZX5.1(83.8);Q9LXI8.1(31.5);	Protein LITTLE ZIPPER 1	adaxial/abaxial axis specification;leaf shaping;	O04291.1(16.7);Q9ZU11.1(16.1);O04292.1(15.0);Q9SE43.2(15.0);Q39123.1(12.9);	Homeobox domain;Homeobox-like domain superfamily;MEKHLA;START domain;START-like domain superfamily;	DNA binding;DNA-binding transcription factor activity;adaxial/abaxial axis specification;adaxial/abaxial pattern specification;cell differentiation;determination of bilateral symmetry;embryonic pattern specification;integument development;lipid binding;meristem initiation;nucleus;polarity specification of adaxial/abaxial axis;positive regulation of cell differentiation;positive regulation of cell…
Q9LSD8.1	Homologous	120	134.779	54.4592	23.5186	Q9SW27.1(144.1);Q8GWJ6.1(120.7);Q9SH14.1(105.9);Q8LCS8.1(102.8);Q9MAB9.1(97.6);	Membrane-anchored ubiquitin-fold protein 4	plasma membrane;	Q8H159.2(55.2);P0CH32.1(47.6);Q3E7T8.2(39.8);Q1EC66.1(39.7);P0CH33.1(31.4);Q9FHQ6.1(27.8);Q3E7K8.1(26.8);Q39256.1(24.8);	Ubiquitin conserved site;Ubiquitin domain;Ubiquitin-like domain;Ubiquitin-like domain superfamily;	cell wall;cellular protein modification process;cytoplasm;cytosol;modification-dependent protein catabolic process;nucleolus;nucleus;plasma membrane;plastid;protein tag;protein ubiquitination;response to UV-B;response to salicylic acid;ubiquitin protein ligase binding;ubiquitin-dependent protein catabolic process;vacuolar membrane;vacuole;
Q9FZE7.1	Homologous	63	147.215	53.1587	23.0464	Q3EBJ8.1(31.9);	Putative F-box protein At1g47702		Q84W80.2(71.8);Q6NKX3.1(61.6);	F-box domain;F-box-like domain superfamily;FBD domain;Leucine-rich repeat 2;Leucine-rich repeat domain superfamily;
Q9SCK1.1	Homologous	94	43.6929	71.0234	22.9634	Q9SCK2.1(130.0);Q9FIR9.1(114.0);Q8L8S2.1(103.6);	Protein RESPONSE TO LOW SULFUR 1	response to salt stress;cellular response to sulfur starvation;cellular oxidant detoxification;	Q9SVR0.1(13.7);Q9SFU1.1(13.0);Q9S9Q9.2(12.7);Q9LRX8.1(12.3);Q9AST1.1(11.9);	BTB/POZ domain;NPH3 domain;Nucleotide-binding alpha-beta plait domain superfamily;RNA recognition motif domain;RNA-binding domain superfamily;Ribosomal protein L13;Ribosomal protein L13 superfamily;Ribosomal protein L13, conserved site;Ribosomal protein L13, eukaryotic/archaeal;SKP1/BTB/POZ domain superfamily;Zinc finger, RanBP2-type;Zinc finger, RanBP2-type superfamily;	RNA binding;cytosol;cytosolic large ribosomal subunit;cytosolic ribosome;mRNA binding;metal ion binding;negative regulation of translation;nucleus;plasma membrane;plasmodesma;polysomal ribosome;protein ubiquitination;ribosome;structural constituent of ribosome;translation;
B3H5R8.1	Homologous	97	144.052	53.2856	22.7936	Q3E8A8.2(137.9);P55852.2(85.6);Q9FLP6.1(79.9);Q9FKC5.1(62.8);Q9FLP5.1(56.8);Q8VZI7.1(52.9);Q9FKC6.1(49.9);	Putative small ubiquitin-related modifier 8	nucleus;cytoplasm;protein sumoylation;protein tag;ubiquitin-like protein ligase binding;	Q8H159.2(36.1);P0CH32.1(32.3);Q3E7T8.2(29.0);Q1EC66.1(28.6);P0CH33.1(24.3);Q9SHE7.3(21.2);Q3E7K8.1(19.5);Q8RUC6.3(18.0);Q39256.1(17.6);Q9FHQ6.1(16.5);	Nedd8-like ubiquitin;Ubiquitin conserved site;Ubiquitin domain;Ubiquitin-like domain;Ubiquitin-like domain superfamily;	cell wall;cellular protein modification process;cytoplasm;cytosol;endoplasmic reticulum;ethylene biosynthetic process;modification-dependent protein catabolic process;nucleolus;nucleus;plasma membrane;plastid;protein neddylation;protein tag;protein ubiquitination;response to UV-B;response to auxin;response to salicylic acid;ubiquitin protein ligase binding;ubiquitin-dependent protein catabolic pr…
Q9SW07.1	Homologous	129	52.1793	67.0558	22.2765	Q9FHH5.1(128.9);Q3E965.2(83.1);Q3EAV6.1(56.0);	Protein GLUTAMINE DUMPER 2	amino acid transport;integral component of membrane;regulation of amino acid export;	Q9FHX3.1(20.3);F4IB81.1(15.5);Q9FYQ8.1(10.7);	Concanavalin A-like lectin/glucanase domain superfamily;Legume lectin domain;Legume lectin, beta chain, Mn/Ca-binding site;LysM domain;LysM domain superfamily;Nonaspanin (TM9SF);Protein kinase domain;Protein kinase, ATP binding site;Protein kinase-like domain superfamily;Serine-threonine/tyrosine-protein kinase, catalytic domain;Serine/threonine-protein kinase, active site;	ATP binding;Golgi apparatus;Golgi medial cisterna;Golgi membrane;abscisic acid-activated signaling pathway;carbohydrate binding;defense response;defense response to bacterium;defense response to fungus;defense response to oomycetes;endosome;endosome membrane;innate immune response;integral component of membrane;membrane;negative regulation of defense response;plasma membrane;plastid;positive regu…
Q1JPP8.1	Homologous	72	39.4977	72.4585	22.1643	Q9LNX4.1(50.4);Q1G3Y4.1(34.1);	Cyclin-dependent protein kinase inhibitor SMR4	protein kinase inhibitor activity;nucleus;cell cycle;regulation of DNA endoreduplication;negative regulation of cell cycle;negative regulation of mitotic nuclear division;	O80930.1(32.2);Q9ZV27.1(18.2);Q9LK10.1(15.2);	Cyclin-dependent protein kinase inhibitor SMR;Helicase superfamily 1/2, ATP-binding domain;Helicase, C-terminal;P-loop containing nucleoside triphosphate hydrolase;SNF2-like, N-terminal domain superfamily;SNF2-related, N-terminal domain;	ATP binding;DNA binding;cell cycle;helicase activity;negative regulation of cell cycle;negative regulation of mitotic nuclear division;nucleus;positive regulation of RNA interference;protein kinase inhibitor activity;regulation of DNA endoreduplication;
Q6AWW4.1	Single-copy	148	130.456	54.0297	21.9685		F-box protein At3g55900		Q1PFK0.1(30.5);Q3EAE5.1(28.9);Q9FJU3.1(27.2);Q3E7J7.1(27.0);Q9FM90.1(26.2);Q501E9.1(26.1);Q9LJF8.2(26.0);Q9FJU2.2(26.0);Q9SMU0.1(25.5);Q9C6I2.1(25.4);	F-box domain;F-box-like domain superfamily;FBD domain;Leucine-rich repeat 2;Leucine-rich repeat domain superfamily;	negative regulation of long-day photoperiodism, flowering;regulation of short-day photoperiodism, flowering;vacuole;
Q9SJH0.1	Known MIP	118	39.2406	71.0356	20.6353	Q9LXR7.1(128.9);	Transcription factor PAR1	transcription coregulator activity;nucleus;shade avoidance;brassinosteroid mediated signaling pathway;developmental process;regulation of growth;protein homodimerization activity;negative regulation of transcription, DNA-templated;	Q9M041.1(31.4);	Aprataxin, C2HE/C2H2/C2HC zinc finger;HIT-like domain;HIT-like superfamily;Helix-loop-helix DNA-binding domain superfamily;Histidine triad, conserved site;Macro domain;Myc-type, basic helix-loop-helix (bHLH) domain;P-loop containing nucleoside triphosphate hydrolase;	ATP binding;DNA 5'-adenosine monophosphate hydrolase activity;DNA replication;adenylylsulfatase activity;double-strand break repair;double-stranded RNA binding;metal ion binding;mismatched DNA binding;nucleus;positive regulation of transcription, DNA-templated;protein dimerization activity;purine ribonucleotide metabolic process;regulation of secondary shoot formation;single strand break repair;s…
Q9ST43.2	Single-copy	145	128.371	52.6993	19.3299		Pleckstrin homology domain-containing protein 1	peroxisome;phosphatidylinositol-3-phosphate binding;	Q9SE83.2(19.6);Q9LQ55.2(18.5);F4JQZ3.2(14.8);Q9FMP8.1(14.2);Q8RWQ4.1(13.0);Q9FIT8.2(12.1);Q5W7F2.1(11.8);	AH/BAR domain superfamily;ARFGAP/RecO-like zinc finger;Ankyrin repeat;Ankyrin repeat-containing domain;Ankyrin repeat-containing domain superfamily;Arf GTPase activating protein;ArfGAP domain superfamily;BAR domain;Dynamin GTPase effector;Dynamin central domain;Dynamin superfamily;Dynamin, GTPase domain;Dynamin, GTPase region, conserved site;Dynamin-type guanine nucleotide-binding (G) domain;GTPa…	GTP binding;GTPase activator activity;GTPase activity;Golgi apparatus;Golgi membrane;Golgi to vacuole transport;Rho GTPase binding;activation of GTPase activity;apical part of cell;apical plasma membrane;cell cortex;cell plate;cell plate formation involved in plant-type cell wall biogenesis;chloroplast thylakoid membrane;clathrin binding;clathrin-coated endocytic vesicle;clathrin-coated vesicle;c…
Q9FGX2.1	Homologous	145	94.3122	55.7497	18.2846	Q9LZP8.1(41.0);Q9LQ65.1(40.1);Q9CA46.1(32.0);	Basic leucine zipper 1	DNA-binding transcription factor activity;nucleus;regulation of cellular amino acid metabolic process;response to osmotic stress;cellular response to starvation;response to bacterium;response to salt stress;anther dehiscence;sugar mediated signaling pathway;sequence-specific DNA binding;transcription regulatory region DNA binding;positive regulation of transcription, DNA-templated;protein heterod…	B9DGI8.1(66.3);Q9M1G6.1(61.6);P42774.2(58.2);O22763.2(57.4);Q9FUD3.1(54.7);Q501B2.1(54.7);	Basic leucine-zipper, C-terminal;Basic-leucine zipper domain;G-box binding protein, multifunctional mosaic region;	DNA binding;DNA-binding transcription factor activity;cellular response to abscisic acid stimulus;cellular response to glucose stimulus;cellular response to starvation;cytoplasm;entrainment of circadian clock;identical protein binding;kinase binding;nucleus;nutrient reservoir activity;plant-type hypersensitive response;positive regulation of seed maturation;positive regulation of transcription, D…
Q9FLE9.1	Known MIP	92	20.1138	91.7098	18.0544	Q9LJX1.1(145.9);Q9LXG5.1(120.3);Q8GW32.1(106.2);Q9CA64.1(97.3);F4JCN9.1(93.2);	Transcription factor PRE1	DNA-binding transcription factor activity;nucleus;photomorphogenesis;gibberellic acid mediated signaling pathway;response to brassinosteroid;brassinosteroid mediated signaling pathway;unidimensional cell growth;regulation of growth;protein dimerization activity;regulation of timing of transition from vegetative to reproductive phase;	Q9ZVX2.2(16.3);	Helix-loop-helix DNA-binding domain superfamily;Myc-type, basic helix-loop-helix (bHLH) domain;Transcription factor MYC/MYB N-terminal;	DNA-binding transcription factor activity;RNA polymerase II cis-regulatory region sequence-specific DNA binding;anther wall tapetum cell differentiation;anther wall tapetum development;chromatin binding;nucleus;pollen development;protein dimerization activity;regulation of transcription, DNA-templated;
Q9LZP8.1	Homologous	146	92.5732	55.689	17.86	Q9CA46.1(45.1);Q9FGX2.1(41.6);Q9LQ65.1(39.9);	bZIP transcription factor 53	DNA-binding transcription factor activity;nucleus;hypotonic response;cellular response to starvation;sequence-specific DNA binding;transcription regulatory region DNA binding;nutrient reservoir activity;positive regulation of transcription, DNA-templated;protein heterodimerization activity;positive regulation of seed maturation;	B9DGI8.1(66.3);Q9M1G6.1(61.6);P42774.2(58.2);O22763.2(57.4);Q9FUD3.1(54.7);Q501B2.1(54.7);	Basic leucine-zipper, C-terminal;Basic-leucine zipper domain;G-box binding protein, multifunctional mosaic region;	DNA binding;DNA-binding transcription factor activity;cellular response to abscisic acid stimulus;cellular response to glucose stimulus;cellular response to starvation;cytoplasm;entrainment of circadian clock;identical protein binding;kinase binding;nucleus;nutrient reservoir activity;plant-type hypersensitive response;positive regulation of seed maturation;positive regulation of transcription, D…
Q9FYA2.1	Homologous	145	155.409	49.5234	17.7617	Q9S763.1(152.8);Q8GY11.1(122.1);	Probable WRKY transcription factor 75	negative regulation of transcription by RNA polymerase II;RNA polymerase II cis-regulatory region sequence-specific DNA binding;DNA-binding transcription factor activity;nucleus;atrichoblast differentiation;regulation of response to nutrient levels;regulation of DNA-templated transcription in response to stress;transcription regulatory region DNA binding;lateral root development;	Q9SZ67.1(113.2);	Leucine-rich repeat 3;Leucine-rich repeat domain superfamily;NB-ARC;P-loop containing nucleoside triphosphate hydrolase;Paired amphipathic helix;Paired amphipathic helix superfamily;Protein kinase domain;Protein kinase-like domain superfamily;Toll/interleukin-1 receptor homology (TIR) domain superfamily;WRKY domain;WRKY domain superfamily;Winged helix DNA-binding domain superfamily;	ADP binding;ATP binding;DNA-binding transcription factor activity;chloroplast envelope;defense response;nucleus;protein serine/threonine kinase activity;sequence-specific DNA binding;transcription regulatory region DNA binding;
Q8GW32.1	Known MIP	94	19.8949	88.6309	17.2222	Q9CA64.1(114.4);Q9LJX1.1(113.5);Q9LXG5.1(110.9);Q9FLE9.1(107.7);F4JCN9.1(101.9);	Transcription factor PRE6	nucleus;cytoplasm;response to light stimulus;regulation of growth;protein dimerization activity;	Q9ZVX2.2(16.3);	Helix-loop-helix DNA-binding domain superfamily;Myc-type, basic helix-loop-helix (bHLH) domain;Transcription factor MYC/MYB N-terminal;	DNA-binding transcription factor activity;RNA polymerase II cis-regulatory region sequence-specific DNA binding;anther wall tapetum cell differentiation;anther wall tapetum development;chromatin binding;nucleus;pollen development;protein dimerization activity;regulation of transcription, DNA-templated;
Q9FDW8.1	Homologous	135	242.424	44.0978	16.914	O48845.1(122.0);Q42342.2(120.0);Q9ZNV4.1(112.7);Q9ZWT2.1(104.1);O22704.1(71.5);	Cytochrome b5 isoform A	chloroplast outer membrane;stromule;integral component of membrane;heme binding;mitochondrial membrane;metal ion binding;	P11035.1(92.1);P11832.3(84.9);Q9ZRP7.1(65.7);Q3EBF7.1(62.8);	Cytochrome b5, heme-binding site;Cytochrome b5-like heme/steroid binding domain;Cytochrome b5-like heme/steroid binding domain superfamily;Eukaryotic molybdopterin oxidoreductase;FAD-binding domain, ferredoxin reductase-type;Fatty acid desaturase;Fatty acid desaturase domain;Ferredoxin-NADP reductase (FNR), nucleotide-binding domain;Flavoprotein pyridine nucleotide cytochrome reductase;Flavoprote…	FAD binding;cellular response to cold;cytosol;endoplasmic reticulum;endoplasmic reticulum membrane;heme binding;integral component of membrane;lipid metabolic process;metal ion binding;molybdenum ion binding;molybdopterin cofactor binding;nitrate assimilation;nitrate reductase (NADH) activity;nitrate reductase (NADPH) activity;nitrate reductase activity;nitric oxide biosynthetic process;nucleus;p…
Q8VZI7.1	Homologous	108	121.526	51.4074	16.3804	Q9FLP6.1(71.2);P55852.2(66.8);B3H5R8.1(52.9);Q9FLP5.1(49.5);Q9FKC5.1(37.3);Q3E8A8.2(36.5);	Small ubiquitin-related modifier 5	nucleus;cytoplasm;protein sumoylation;protein tag;ubiquitin-like protein ligase binding;	Q8H159.2(35.5);P0CH32.1(31.6);Q3E7T8.2(28.2);Q1EC66.1(28.1);P0CH33.1(23.9);Q9SHE7.3(20.9);Q3E7K8.1(19.0);Q8RUC6.3(17.7);Q39256.1(16.8);Q9FHQ6.1(16.4);	Nedd8-like ubiquitin;Ubiquitin conserved site;Ubiquitin domain;Ubiquitin-like domain;Ubiquitin-like domain superfamily;	cell wall;cellular protein modification process;cytoplasm;cytosol;endoplasmic reticulum;ethylene biosynthetic process;modification-dependent protein catabolic process;nucleolus;nucleus;plasma membrane;plastid;protein neddylation;protein tag;protein ubiquitination;response to UV-B;response to auxin;response to salicylic acid;ubiquitin protein ligase binding;ubiquitin-dependent protein catabolic pr…
Q2V2Y3.1	Homologous	87	37.5595	67.4023	16.3542	Q8GXV6.1(100.9);Q2V4G6.1(42.1);P82761.1(38.9);P82791.1(34.5);Q2V334.1(30.0);	Putative defensin-like protein 84	extracellular region;killing of cells of other organism;defense response to fungus;	Q42601.1(13.5);Q8L4B0.1(12.0);	ATP-grasp fold;Carbamoyl-phosphate synthase large chain, methylglyoxal synthase-like domain;Carbamoyl-phosphate synthase large subunit, CPSase domain;Carbamoyl-phosphate synthase, large subunit;Carbamoyl-phosphate synthetase large subunit-like, ATP-binding domain;Carbamoyl-phosphate synthetase, large subunit oligomerisation domain;Carbamoyl-phosphate synthetase, large subunit oligomerisation doma…	'de novo' UMP biosynthetic process;ATP binding;Golgi membrane;arginine biosynthetic process;carbamoyl-phosphate synthase (glutamine-hydrolyzing) activity;carbamoyl-phosphate synthase complex;cell wall organization;cellular response to phosphate starvation;chloroplast;chloroplast stroma;cytoplasm;glutamine metabolic process;integral component of membrane;metal ion binding;nitrogen compound metabol…
Q9LXG5.1	Known MIP	94	19.8949	84.9372	16.2469	Q9LJX1.1(121.4);Q9FLE9.1(121.1);Q8GW32.1(110.4);Q9CA64.1(97.4);F4JCN9.1(92.4);	Transcription factor PRE2	DNA-binding transcription factor activity;nucleus;vacuole;photomorphogenesis;gibberellic acid mediated signaling pathway;regulation of growth;protein dimerization activity;regulation of timing of transition from vegetative to reproductive phase;	Q9ZVX2.2(16.3);	Helix-loop-helix DNA-binding domain superfamily;Myc-type, basic helix-loop-helix (bHLH) domain;Transcription factor MYC/MYB N-terminal;	DNA-binding transcription factor activity;RNA polymerase II cis-regulatory region sequence-specific DNA binding;anther wall tapetum cell differentiation;anther wall tapetum development;chromatin binding;nucleus;pollen development;protein dimerization activity;regulation of transcription, DNA-templated;
Q8S8D6.1	Single-copy	135	112.166	52.1141	16.0672		Probable transcription factor At2g20613	regulation of transcription, DNA-templated;	C0SUU6.1(94.4);Q9ZU30.1(38.8);Q9SYA9.1(36.6);O23063.1(35.9);Q9LG15.2(31.6);Q9C517.1(29.5);O04608.1(26.3);O65270.1(24.5);Q8LG05.1(21.0);Q9CAV7.1(20.6);	GLABROUS1 enhancer-binding protein family;	cell;cellular response to glucose stimulus;cytosol;glucosinolate metabolic process;negative regulation of gene expression;nucleolus;nucleus;regulation of transcription, DNA-templated;transcription regulatory region DNA binding;
F4HXU3.1	Known MIP	142	75.1342	56.9049	15.9712		Protein KNATM	DNA binding;nucleus;cytoplasm;leaf proximal/distal pattern formation;positive regulation of transcription, DNA-templated;	P48000.1(26.5);P48001.3(25.4);P46639.1(24.7);Q9FPQ8.1(20.7);P48002.2(20.1);P46640.3(17.8);Q84JS6.1(13.1);Q38874.2(12.9);	ELK domain;Homeobox KN domain;Homeobox domain;Homeobox, conserved site;Homeobox-like domain superfamily;KNOX1;KNOX2;	DNA binding;DNA-binding transcription factor activity;RNA binding;carpel development;cell fate commitment;cell fate specification;cellular response to cytokine stimulus;cellular response to ethylene stimulus;cytokinin biosynthetic process;cytokinin-activated signaling pathway;cytoplasm;cytosol;detection of cytokinin stimulus;detection of ethylene stimulus;endosome;floral meristem determinacy;meri…
Q3EBP1.1	Single-copy	150	257.555	42.6373	15.6766		Putative F-box protein At2g33655		Q9LRW6.1(81.8);Q9FVQ9.1(78.5);Q9LUN5.1(78.1);Q9LUQ9.1(77.4);P0DI00.1(76.6);P0DI01.1(76.6);Q84X17.2(76.6);Q9LV45.1(76.3);Q9FIH1.2(74.3);Q9FKJ1.1(74.0);	F-box associated domain, type 1;F-box associated interaction domain;F-box domain;F-box-like domain superfamily;Galactose oxidase/kelch, beta-propeller;	nucleus;protein ubiquitination;
Q9CA64.1	Known MIP	93	20.0042	81.6065	15.2322	Q8GW32.1(114.5);F4JCN9.1(113.9);Q9LJX1.1(102.6);Q9LXG5.1(98.0);Q9FLE9.1(97.7);	Transcription factor PRE3	DNA-binding transcription factor activity;nucleus;cytoplasm;gibberellic acid mediated signaling pathway;brassinosteroid mediated signaling pathway;embryonic root morphogenesis;regulation of growth;protein dimerization activity;	Q9ZVX2.2(16.3);	Helix-loop-helix DNA-binding domain superfamily;Myc-type, basic helix-loop-helix (bHLH) domain;Transcription factor MYC/MYB N-terminal;	DNA-binding transcription factor activity;RNA polymerase II cis-regulatory region sequence-specific DNA binding;anther wall tapetum cell differentiation;anther wall tapetum development;chromatin binding;nucleus;pollen development;protein dimerization activity;regulation of transcription, DNA-templated;
P82791.1	Homologous	101	39.6404	65.0455	15.0083	Q2V4G6.1(48.7);Q2V334.1(46.2);P82761.1(41.2);Q2V2Y3.1(34.6);	Putative defensin-like protein 86	extracellular region;killing of cells of other organism;defense response to fungus;	Q42601.1(15.2);Q8L4B0.1(13.5);	ATP-grasp fold;Carbamoyl-phosphate synthase large chain, methylglyoxal synthase-like domain;Carbamoyl-phosphate synthase large subunit, CPSase domain;Carbamoyl-phosphate synthase, large subunit;Carbamoyl-phosphate synthetase large subunit-like, ATP-binding domain;Carbamoyl-phosphate synthetase, large subunit oligomerisation domain;Carbamoyl-phosphate synthetase, large subunit oligomerisation doma…	'de novo' UMP biosynthetic process;ATP binding;Golgi membrane;arginine biosynthetic process;carbamoyl-phosphate synthase (glutamine-hydrolyzing) activity;carbamoyl-phosphate synthase complex;cell wall organization;cellular response to phosphate starvation;chloroplast;chloroplast stroma;cytoplasm;glutamine metabolic process;integral component of membrane;metal ion binding;nitrogen compound metabol…
Q9XI29.2	Homologous	148	18.4825	83.9554	14.8133	Q9SSC1.1(172.2);	Uncharacterized protein At1g15400	plasma membrane;	Q9FKJ9.1(14.0);Q9SWW6.1(13.2);	Cellulose synthase;Cellulose synthase, RING-type zinc finger;Homeobox-like domain superfamily;Homeodomain, ZF-HD class;Nucleotide-diphospho-sugar transferases;ZF-HD homeobox protein, Cys/His-rich dimerisation domain;Zinc finger, RING-type;Zinc finger, RING/FYVE/PHD-type;	DNA binding;Golgi apparatus;cellulose biosynthetic process;cellulose synthase (UDP-forming) activity;cellulose synthase activity;cellulose synthase complex;chloroplast;integral component of membrane;metal ion binding;nucleus;plant-type cell wall biogenesis;plant-type primary cell wall biogenesis;plant-type secondary cell wall biogenesis;plasma membrane;protein homodimerization activity;rhamnogala…
P0DN98.1	Single-copy	104	26.1472	71.6192	14.1298		Precursor of CEP11	hormone activity;apoplast;root development;nitrate import;regulation of root development;	A0A1I9LMX5.1(44.4);Q9ZUF4.1(13.8);	C-terminally encoded peptide;Protein kinase domain;Protein kinase-like domain superfamily;Serine-threonine/tyrosine-protein kinase, catalytic domain;Serine/threonine-protein kinase, active site;	ATP binding;apoplast;cellular response to nitrogen starvation;defense response to bacterium;extracellular region;hormone activity;nitrate import;plasma membrane;protein phosphorylation;protein serine/threonine kinase activity;regulation of lateral root development;regulation of leaf morphogenesis;regulation of root development;response to ammonium ion;response to auxin;response to nitrogen compou…
Q84W98.1	Homologous	99	33.6732	66.502	13.9216	Q941C5.1(69.5);	CLAVATA3/ESR (CLE)-related protein 41	extracellular region;extracellular space;procambium histogenesis;phloem or xylem histogenesis;xylem development;secondary shoot formation;receptor serine/threonine kinase binding;cell-cell signaling involved in cell fate commitment;apoplast;cell division;axillary shoot meristem initiation;	Q39086.1(12.4);Q9S972.2(10.5);	Bulb-type lectin domain;Bulb-type lectin domain superfamily;PAN/Apple domain;Protein kinase domain;Protein kinase, ATP binding site;Protein kinase-like domain superfamily;S-locus glycoprotein domain;S-locus receptor kinase, C-terminal;S-locus, receptor kinase;S-receptor-like serine/threonine-protein kinase;Serine-threonine/tyrosine-protein kinase, catalytic domain;Serine/threonine-protein kinase,…	ATP binding;abscisic acid-activated signaling pathway;carbohydrate binding;cellular protein localization;cellular response to abscisic acid stimulus;cytosol;integral component of membrane;nucleus;plasma membrane;protein autophosphorylation;protein kinase activity;protein phosphorylation;protein serine/threonine kinase activity;recognition of pollen;transmembrane receptor protein serine/threonine …
Q9LXR7.1	Known MIP	118	39.2406	64.0017	13.9062	Q9SJH0.1(128.6);	Transcription factor PAR2	nucleus;circadian rhythm;shade avoidance;brassinosteroid mediated signaling pathway;developmental process;regulation of growth;	Q9M041.1(31.4);	Aprataxin, C2HE/C2H2/C2HC zinc finger;HIT-like domain;HIT-like superfamily;Helix-loop-helix DNA-binding domain superfamily;Histidine triad, conserved site;Macro domain;Myc-type, basic helix-loop-helix (bHLH) domain;P-loop containing nucleoside triphosphate hydrolase;	ATP binding;DNA 5'-adenosine monophosphate hydrolase activity;DNA replication;adenylylsulfatase activity;double-strand break repair;double-stranded RNA binding;metal ion binding;mismatched DNA binding;nucleus;positive regulation of transcription, DNA-templated;protein dimerization activity;purine ribonucleotide metabolic process;regulation of secondary shoot formation;single strand break repair;s…
Q9LJX1.1	Known MIP	92	20.1138	76.7141	13.3117	Q9FLE9.1(146.1);Q9LXG5.1(120.9);Q8GW32.1(112.6);Q9CA64.1(102.6);F4JCN9.1(91.2);	Transcription factor PRE5	nucleus;gibberellic acid mediated signaling pathway;regulation of growth;protein dimerization activity;	Q9ZVX2.2(16.3);	Helix-loop-helix DNA-binding domain superfamily;Myc-type, basic helix-loop-helix (bHLH) domain;Transcription factor MYC/MYB N-terminal;	DNA-binding transcription factor activity;RNA polymerase II cis-regulatory region sequence-specific DNA binding;anther wall tapetum cell differentiation;anther wall tapetum development;chromatin binding;nucleus;pollen development;protein dimerization activity;regulation of transcription, DNA-templated;
P55852.2	Homologous	100	138.199	47.479	13.1522	Q9FLP6.1(171.1);Q9FLP5.1(89.2);B3H5R8.1(85.2);Q3E8A8.2(78.6);Q9FKC5.1(71.9);Q8VZI7.1(66.3);Q9FKC6.1(58.1);	Small ubiquitin-related modifier 1	nucleus;cytoplasm;cytosol;response to heat;heat acclimation;protein sumoylation;protein tag;negative regulation of DNA-binding transcription factor activity;ubiquitin-like protein ligase binding;	Q8H159.2(36.1);P0CH32.1(32.3);Q3E7T8.2(29.0);Q1EC66.1(28.6);P0CH33.1(24.3);Q9SHE7.3(21.2);Q3E7K8.1(19.5);Q8RUC6.3(18.0);Q39256.1(17.6);Q9FHQ6.1(16.5);	Nedd8-like ubiquitin;Ubiquitin conserved site;Ubiquitin domain;Ubiquitin-like domain;Ubiquitin-like domain superfamily;	cell wall;cellular protein modification process;cytoplasm;cytosol;endoplasmic reticulum;ethylene biosynthetic process;modification-dependent protein catabolic process;nucleolus;nucleus;plasma membrane;plastid;protein neddylation;protein tag;protein ubiquitination;response to UV-B;response to auxin;response to salicylic acid;ubiquitin protein ligase binding;ubiquitin-dependent protein catabolic pr…
Q8GWJ6.1	Homologous	119	136.776	47.2882	12.7938	Q9SH14.1(171.1);Q9LSD8.1(120.9);Q9MAB9.1(118.4);Q8LCS8.1(113.9);Q9SW27.1(101.9);	Membrane-anchored ubiquitin-fold protein 6	plasma membrane;	Q8H159.2(55.2);P0CH32.1(47.6);Q3E7T8.2(39.8);Q1EC66.1(39.7);P0CH33.1(31.4);Q9FHQ6.1(27.8);Q3E7K8.1(26.8);Q39256.1(24.8);	Ubiquitin conserved site;Ubiquitin domain;Ubiquitin-like domain;Ubiquitin-like domain superfamily;	cell wall;cellular protein modification process;cytoplasm;cytosol;modification-dependent protein catabolic process;nucleolus;nucleus;plasma membrane;plastid;protein tag;protein ubiquitination;response to UV-B;response to salicylic acid;ubiquitin protein ligase binding;ubiquitin-dependent protein catabolic process;vacuolar membrane;vacuole;
Q9LUU4.1	Single-copy	135	230.562	41.203	12.2581		Putative F-box protein At3g17270		Q9LUP4.1(104.1);Q9LUU3.1(97.2);Q9LUP1.1(91.8);Q9LJ39.1(82.1);Q9LUU5.2(72.7);Q9LUP8.1(63.8);Q9LUP9.1(61.7);Q9LRZ2.2(56.1);Q9LUV7.1(53.8);Q9ZNQ3.1(53.1);	F-box associated domain, type 1;F-box associated interaction domain;F-box domain;F-box-like domain superfamily;Galactose oxidase/kelch, beta-propeller;Leucine-rich repeat domain superfamily;
Q941C5.1	Homologous	112	32.3176	65.0071	12.2066	Q84W98.1(69.5);	CLAVATA3/ESR (CLE)-related protein 44	extracellular region;extracellular space;procambium histogenesis;phloem or xylem histogenesis;xylem development;receptor serine/threonine kinase binding;cell-cell signaling involved in cell fate commitment;apoplast;axillary shoot meristem initiation;	Q39086.1(12.4);Q9S972.2(10.5);	Bulb-type lectin domain;Bulb-type lectin domain superfamily;PAN/Apple domain;Protein kinase domain;Protein kinase, ATP binding site;Protein kinase-like domain superfamily;S-locus glycoprotein domain;S-locus receptor kinase, C-terminal;S-locus, receptor kinase;S-receptor-like serine/threonine-protein kinase;Serine-threonine/tyrosine-protein kinase, catalytic domain;Serine/threonine-protein kinase,…	ATP binding;abscisic acid-activated signaling pathway;carbohydrate binding;cellular protein localization;cellular response to abscisic acid stimulus;cytosol;integral component of membrane;nucleus;plasma membrane;protein autophosphorylation;protein kinase activity;protein phosphorylation;protein serine/threonine kinase activity;recognition of pollen;transmembrane receptor protein serine/threonine …
Q3ECU8.1	Single-copy	82	16.1377	78.772	11.3971		Zinc finger CCCH domain-containing protein 13	DNA binding;metal ion binding;	Q9SD61.1(16.6);	E3 ligase, CCCH-type zinc finger;Nucleotide-binding alpha-beta plait domain superfamily;RNA recognition motif domain;RNA-binding domain superfamily;Zinc finger, CCCH-type;Zinc finger, CCCH-type superfamily;	RNA binding;U2 snRNP;mRNA splicing, via spliceosome;metal ion binding;nuclear speck;precatalytic spliceosome;transcription regulatory region DNA binding;
Q9FLP5.1	Homologous	111	118.5	47.5703	11.371	Q9FLP6.1(90.8);P55852.2(89.6);Q3E8A8.2(59.3);B3H5R8.1(56.6);Q9FKC5.1(54.9);Q8VZI7.1(49.5);Q9FKC6.1(42.3);	Small ubiquitin-related modifier 3	nucleus;cytoplasm;protein sumoylation;protein tag;ubiquitin-like protein ligase binding;	Q8H159.2(36.1);P0CH32.1(32.3);Q3E7T8.2(29.0);Q1EC66.1(28.6);P0CH33.1(24.3);Q9SHE7.3(21.2);Q3E7K8.1(19.5);Q8RUC6.3(18.0);Q39256.1(17.6);Q9FHQ6.1(16.5);	Nedd8-like ubiquitin;Ubiquitin conserved site;Ubiquitin domain;Ubiquitin-like domain;Ubiquitin-like domain superfamily;	cell wall;cellular protein modification process;cytoplasm;cytosol;endoplasmic reticulum;ethylene biosynthetic process;modification-dependent protein catabolic process;nucleolus;nucleus;plasma membrane;plastid;protein neddylation;protein tag;protein ubiquitination;response to UV-B;response to auxin;response to salicylic acid;ubiquitin protein ligase binding;ubiquitin-dependent protein catabolic pr…
Q9LT82.1	Single-copy	103	339.019	36.2262	11.191		Maternally expressed PAB C-terminal protein	RNA binding;regulation of translation;seed morphogenesis;regulation of endosperm development;	Q9FXA2.1(66.9);P42731.1(60.2);O22173.1(58.0);Q05196.3(51.9);O64380.1(51.1);Q9ZQA8.1(41.5);	Nucleotide-binding alpha-beta plait domain superfamily;PABC (PABP) domain;Paraneoplastic encephalomyelitis antigen;Polyadenylate binding protein, human types 1, 2, 3, 4;Polyadenylate-binding protein/Hyperplastic disc protein;RNA recognition motif domain;RNA recognition motif domain, eukaryote;RNA-binding domain superfamily;	RNA binding;cytoplasm;cytosol;mRNA 3'-UTR binding;mRNA binding;mRNA processing;mitochondrion;nuclear-transcribed mRNA catabolic process, nonsense-mediated decay;nuclear-transcribed mRNA poly(A) tail shortening;nucleus;plasma membrane;poly(A) binding;poly(U) RNA binding;regulation of nuclear-transcribed mRNA catabolic process, deadenylation-dependent decay;regulation of nuclear-transcribed mRNA po…
F4I9R6.2	Single-copy	131	399.625	34.4145	11.0662		Jacalin-related lectin 15	carbohydrate binding;defense response to virus;	O80948.1(117.7);O04316.1(115.6);F4IB95.1(113.9);O80950.1(109.8);Q9SAV1.1(109.6);O04309.1(97.7);O04311.1(76.9);Q9LIF8.1(63.6);O04312.1(63.2);Q9LTA7.1(51.0);	Jacalin-like lectin domain;Jacalin-like lectin domain superfamily;Jacalin-like lectin domain, plant;Kelch repeat type 1;Kelch-type beta propeller;	carbohydrate binding;cell adhesion;chloroplast;cytosol;defense response;embryo development ending in seed dormancy;enzyme regulator activity;flower development;glucosinolate catabolic process;nitrile biosynthetic process;nucleus;plasmodesma;response to cold;response to jasmonic acid;response to wounding;response to zinc ion;thioglucosidase binding;thioglucosidase complex;vacuole;vegetative to rep…
Q3E965.2	Homologous	131	61.2606	54.1565	10.4253	Q9FHH5.1(93.5);Q9SW07.1(83.7);Q3EAV6.1(56.0);Q3E8L0.1(33.7);	Protein GLUTAMINE DUMPER 5	amino acid transport;integral component of membrane;regulation of amino acid export;	Q9FHX3.1(22.2);F4IB81.1(16.9);Q39202.2(12.9);Q944M5.1(10.4);	Bulb-type lectin domain;Bulb-type lectin domain superfamily;Concanavalin A-like lectin/glucanase domain superfamily;Legume lectin domain;Legume lectin, beta chain, Mn/Ca-binding site;LysM domain;LysM domain superfamily;MFS transporter superfamily;PAN/Apple domain;Protein kinase domain;Protein kinase, ATP binding site;Protein kinase-like domain superfamily;S-receptor-like serine/threonine-protein …	ATP binding;abscisic acid-activated signaling pathway;calmodulin binding;carbohydrate binding;carbohydrate transport;defense response;defense response to bacterium;defense response to fungus;defense response to oomycetes;innate immune response;integral component of membrane;integral component of plasma membrane;negative regulation of defense response;plasma membrane;positive regulation of abscisi…
P0DN99.1	Homologous	92	36.1159	60.7054	10.2221	Q3EBM6.1(100.4);	Precursor of CEP12	hormone activity;response to jasmonic acid;apoplast;root development;nitrate import;regulation of root development;	A0A1I9LMX5.1(37.3);Q84K47.1(14.0);	AAA+ ATPase domain;ABC transporter A;ABC transporter, conserved site;ABC transporter-like;C-terminally encoded peptide;P-loop containing nucleoside triphosphate hydrolase;	ATP binding;ATPase activity;ATPase-coupled transmembrane transporter activity;apoplast;cellular response to nitrogen starvation;extracellular region;hormone activity;integral component of membrane;intracellular membrane-bounded organelle;lipid transport;lipid transporter activity;nitrate import;regulation of lateral root development;regulation of leaf morphogenesis;regulation of root development;…
Q9SCK2.1	Homologous	97	41.8087	58.7031	10.2104	Q9FIR9.1(142.7);Q8L8S2.1(133.4);Q9SCK1.1(129.9);	Protein RESPONSE TO LOW SULFUR 3	cellular oxidant detoxification;	Q9SVR0.1(13.7);Q9SFU1.1(13.0);Q9S9Q9.2(12.7);Q9LRX8.1(12.3);Q9AST1.1(11.9);	BTB/POZ domain;NPH3 domain;Nucleotide-binding alpha-beta plait domain superfamily;RNA recognition motif domain;RNA-binding domain superfamily;Ribosomal protein L13;Ribosomal protein L13 superfamily;Ribosomal protein L13, conserved site;Ribosomal protein L13, eukaryotic/archaeal;SKP1/BTB/POZ domain superfamily;Zinc finger, RanBP2-type;Zinc finger, RanBP2-type superfamily;	RNA binding;cytosol;cytosolic large ribosomal subunit;cytosolic ribosome;mRNA binding;metal ion binding;negative regulation of translation;nucleus;plasma membrane;plasmodesma;polysomal ribosome;protein ubiquitination;ribosome;structural constituent of ribosome;translation;
Q9SSS5.2	Single-copy	90	37.4607	59.6856	9.84483		Putative cytochrome c oxidase subunit 5b-like	cytochrome-c oxidase activity;mitochondrial envelope;metal ion binding;	O81275.1(16.0);P40228.1(11.0);O80507.1(11.0);P40229.1(10.7);	Casein kinase II subunit beta-like;Casein kinase II, regulatory subunit;Casein kinase II, regulatory subunit, N-terminal;	circadian rhythm;cytoplasm;cytosol;nucleus;photoperiodism, flowering;positive regulation of circadian rhythm;protein kinase CK2 complex;protein kinase regulator activity;protein phosphorylation;protein serine/threonine kinase activity;regulation of circadian rhythm;regulation of protein serine/threonine kinase activity;transcription factor binding;
Q9FKW8.1	Homologous	136	34.8486	59.7632	9.21089	Q39129.2(106.0);	Thiosulfate sulfurtransferase 18	thiosulfate sulfurtransferase activity;cytoplasm;	Q93WI0.1(27.8);Q9ZNW0.1(21.6);F4I933.1(15.4);	Adenylyltransferase and sulfurtransferase MOCS3/Uba4;Peptidyl-prolyl cis-trans isomerase, PpiC-type;Rhodanase, C-terminal;Rhodanese-like domain;Rhodanese-like domain superfamily;THIF-type NAD/FAD binding fold;UPF0176, acylphosphatase-like domain;Ubiquitin-activating enzyme;	ATP binding;Mo-molybdopterin cofactor biosynthetic process;Mo-molybdopterin cofactor sulfurase activity;URM1 activating enzyme activity;chloroplast;cytoplasm;cytosol;enzyme active site formation via cysteine modification to L-cysteine persulfide;metal ion binding;molybdopterin-synthase adenylyltransferase activity;molybdopterin-synthase sulfurtransferase activity;nucleotidyltransferase activity;p…
Q9M8Y4.1	Homologous	142	465.287	30.5782	8.85738	F4JZT3.1(84.3);	Two-component response regulator ARR22	phosphorelay response regulator activity;phosphorelay signal transduction system;nucleus;cytoplasm;regulation of transcription, DNA-templated;cytokinin-activated signaling pathway;protein histidine phosphatase activity;	Q9C5U2.1(69.2);Q9C5U0.1(54.4);Q9C5U1.1(51.8);Q3S4A7.1(51.6);Q9SXL4.2(48.6);O22267.1(48.3);Q9ZTP3.1(46.1);O49397.1(32.0);Q9FXD6.1(32.0);	CHASE domain;CheY-like superfamily;Ethylene receptor;GAF domain;GAF-like domain superfamily;Histidine kinase domain;Histidine kinase/HSP90-like ATPase;Histidine kinase/HSP90-like ATPase superfamily;Homeobox-like domain superfamily;Myb domain;Myb domain, plants;PAS domain superfamily;Phosphoribosyltransferase domain;Response regulator B-type, plant;SANT/Myb domain;Signal transduction histidine kin…	ATP binding;DNA binding;DNA-binding transcription factor activity;abscisic acid-activated signaling pathway;carbohydrate homeostasis;cellular response to abscisic acid stimulus;cellular response to cold;cellular response to cytokinin stimulus;cellular response to hydrogen peroxide;cellular response to molecule of bacterial origin;cellular response to nitric oxide;cellular response to phosphate st…
Q6DUW6.1	Homologous	93	10.8616	84.3851	8.77863	Q6DUW9.1(58.0);Q6DUW7.1(39.7);Q6DUW8.2(31.9);	Protein IDA-LIKE 4	extracellular space;floral organ abscission;	Q9LSS4.1(12.4);	Tetraspanin;Tetraspanin/Peripherin;	integral component of membrane;plasma membrane;plasmodesma;
Q9FL73.1	Homologous	96	24.6942	63.9885	8.74375	Q2V4L5.1(153.9);Q2V2Y6.1(74.7);Q3EBU2.1(61.9);P82792.1(49.8);Q2V4C3.1(35.1);	Defensin-like protein 69	extracellular region;killing of cells of other organism;defense response to fungus;	Q9SRY6.2(26.9);Q9LT84.2(12.9);	Glutathione S-transferase, C-terminal;Glutathione S-transferase, C-terminal domain superfamily;Glutathione S-transferase, C-terminal-like;Glutathione S-transferase, N-terminal;Glutathione S-transferases Phi, C-terminal;Glutathione Transferase family;Protein of unknown function DUF677;Thioredoxin-like superfamily;	cytoplasm;cytosol;glutathione binding;glutathione metabolic process;glutathione transferase activity;integral component of membrane;mitochondrion;plasma membrane;toxin catabolic process;
Q570N1.2	Single-copy	123	36.3076	58.5016	8.73266		F-box protein PP2-B3		Q9ZVR1.1(113.9);O80494.2(81.1);	F-box-like domain superfamily;Phloem protein 2-like;	carbohydrate binding;
Q9SQT9.1	Single-copy	125	12.8152	76.9632	8.55251		Classical arabinogalactan protein 27	plasma membrane;anchored component of membrane;	O23144.2(11.0);	Proton pump-interactor;	cytosol;endoplasmic reticulum;endoplasmic reticulum membrane;integral component of membrane;mRNA binding;plasma membrane;plasmodesma;regulation of proton transport;
F4JCN9.1	Known MIP	92	20.1138	66.6098	8.36828	Q9CA64.1(113.5);Q8GW32.1(101.5);Q9FLE9.1(93.5);Q9LXG5.1(92.8);Q9LJX1.1(91.3);	Transcription factor PRE4	DNA-binding transcription factor activity;nucleus;photomorphogenesis;gibberellic acid mediated signaling pathway;regulation of growth;protein dimerization activity;regulation of timing of transition from vegetative to reproductive phase;	Q9ZVX2.2(16.3);	Helix-loop-helix DNA-binding domain superfamily;Myc-type, basic helix-loop-helix (bHLH) domain;Transcription factor MYC/MYB N-terminal;	DNA-binding transcription factor activity;RNA polymerase II cis-regulatory region sequence-specific DNA binding;anther wall tapetum cell differentiation;anther wall tapetum development;chromatin binding;nucleus;pollen development;protein dimerization activity;regulation of transcription, DNA-templated;
Q9SW27.1	Homologous	118	138.797	41.972	7.93545	Q9LSD8.1(144.5);Q8LCS8.1(106.0);Q9SH14.1(103.6);Q8GWJ6.1(102.1);Q9MAB9.1(101.1);	Membrane-anchored ubiquitin-fold protein 3	plasma membrane;	Q8H159.2(55.2);P0CH32.1(47.6);Q3E7T8.2(39.8);Q1EC66.1(39.7);P0CH33.1(31.4);Q9FHQ6.1(27.8);Q3E7K8.1(26.8);Q39256.1(24.8);	Ubiquitin conserved site;Ubiquitin domain;Ubiquitin-like domain;Ubiquitin-like domain superfamily;	cell wall;cellular protein modification process;cytoplasm;cytosol;modification-dependent protein catabolic process;nucleolus;nucleus;plasma membrane;plastid;protein tag;protein ubiquitination;response to UV-B;response to salicylic acid;ubiquitin protein ligase binding;ubiquitin-dependent protein catabolic process;vacuolar membrane;vacuole;
Q9C8M4.1	Homologous	61	20.1402	65.4557	7.8206	Q9FLM8.1(62.5);	DNA-directed RNA polymerase subunit 12-like protein	DNA binding;DNA-directed 5'-3' RNA polymerase activity;RNA polymerase II, core complex;RNA polymerase III complex;RNA polymerase I complex;transcription by RNA polymerase I;transcription by RNA polymerase II;transcription by RNA polymerase III;zinc ion binding;pollen tube growth;	F4I8S3.1(11.3);	Helicase superfamily 1/2, ATP-binding domain;Helicase, C-terminal;P-loop containing nucleoside triphosphate hydrolase;SNF2-like, N-terminal domain superfamily;SNF2-related, N-terminal domain;	ATP binding;DNA binding;helicase activity;nucleus;positive regulation of RNA interference;
Q9FKC5.1	Homologous	114	113.568	43.9167	7.79125	Q9FKC6.1(149.5);Q9FLP6.1(74.2);P55852.2(72.8);Q3E8A8.2(63.9);B3H5R8.1(63.3);Q9FLP5.1(55.3);Q8VZI7.1(37.6);	Putative small ubiquitin-related modifier 4	nucleus;cytoplasm;protein sumoylation;protein tag;ubiquitin-like protein ligase binding;	Q8H159.2(36.1);P0CH32.1(32.3);Q3E7T8.2(29.0);Q1EC66.1(28.6);P0CH33.1(24.3);Q9SHE7.3(21.2);Q3E7K8.1(19.5);Q8RUC6.3(18.0);Q39256.1(17.6);Q9FHQ6.1(16.5);	Nedd8-like ubiquitin;Ubiquitin conserved site;Ubiquitin domain;Ubiquitin-like domain;Ubiquitin-like domain superfamily;	cell wall;cellular protein modification process;cytoplasm;cytosol;endoplasmic reticulum;ethylene biosynthetic process;modification-dependent protein catabolic process;nucleolus;nucleus;plasma membrane;plastid;protein neddylation;protein tag;protein ubiquitination;response to UV-B;response to auxin;response to salicylic acid;ubiquitin protein ligase binding;ubiquitin-dependent protein catabolic pr…
Q9FKC6.1	Homologous	117	66.6853	49.4735	7.58779	Q9FKC5.1(149.3);Q9FLP6.1(60.0);P55852.2(58.9);Q3E8A8.2(50.6);B3H5R8.1(50.0);Q9FLP5.1(42.7);	Putative small ubiquitin-related modifier 6	nucleus;cytoplasm;protein sumoylation;protein tag;ubiquitin-like protein ligase binding;	Q8H159.2(17.7);Q3E7T8.2(17.1);P0CH32.1(17.0);Q1EC66.1(16.2);P0CH33.1(15.6);Q3E7K8.1(12.1);Q39256.1(11.9);	Ubiquitin conserved site;Ubiquitin domain;Ubiquitin-like domain;Ubiquitin-like domain superfamily;	cell wall;cellular protein modification process;cytoplasm;cytosol;modification-dependent protein catabolic process;nucleus;plasma membrane;protein tag;protein ubiquitination;response to UV-B;response to salicylic acid;ubiquitin protein ligase binding;ubiquitin-dependent protein catabolic process;vacuole;
Q9LNX4.1	Homologous	82	31.2723	58.3561	7.43875	Q1JPP8.1(49.0);Q1G3Y4.1(31.8);Q9SAD3.1(31.2);	Cyclin-dependent protein kinase inhibitor SMR5	protein kinase inhibitor activity;nucleus;cellular response to DNA damage stimulus;cell cycle;regulation of DNA endoreduplication;negative regulation of cell cycle;negative regulation of mitotic nuclear division;	O80930.1(34.4);Q9ZV27.1(20.5);Q9LK10.1(13.6);	Cyclin-dependent protein kinase inhibitor SMR;Helicase superfamily 1/2, ATP-binding domain;Helicase, C-terminal;P-loop containing nucleoside triphosphate hydrolase;SNF2-like, N-terminal domain superfamily;SNF2-related, N-terminal domain;	ATP binding;DNA binding;cell cycle;helicase activity;negative regulation of cell cycle;negative regulation of mitotic nuclear division;nucleus;positive regulation of RNA interference;protein kinase inhibitor activity;regulation of DNA endoreduplication;
Q9SSC1.1	Homologous	138	19.4657	64.7717	7.24496	Q9XI29.2(169.6);	MAPK kinase substrate protein At1g80180	plasma membrane;stomatal complex patterning;	Q9FKJ9.1(14.0);Q9SWW6.1(13.2);	Cellulose synthase;Cellulose synthase, RING-type zinc finger;Homeobox-like domain superfamily;Homeodomain, ZF-HD class;Nucleotide-diphospho-sugar transferases;ZF-HD homeobox protein, Cys/His-rich dimerisation domain;Zinc finger, RING-type;Zinc finger, RING/FYVE/PHD-type;	DNA binding;Golgi apparatus;cellulose biosynthetic process;cellulose synthase (UDP-forming) activity;cellulose synthase activity;cellulose synthase complex;chloroplast;integral component of membrane;metal ion binding;nucleus;plant-type cell wall biogenesis;plant-type primary cell wall biogenesis;plant-type secondary cell wall biogenesis;plasma membrane;protein homodimerization activity;rhamnogala…
O49596.1	Homologous	144	78.4573	46.8889	7.07739	P93047.1(230.1);Q42344.1(130.7);O49597.1(95.9);	High mobility group B protein 2	chromatin;DNA binding;chromatin binding;DNA-binding transcription factor activity;nucleus;cytosol;chromatin assembly or disassembly;structural constituent of chromatin;	Q05153.2(52.0);Q9MAT6.1(24.7);Q9LTT3.1(24.2);Q9LG02.2(21.9);Q9SGS2.1(21.1);	ARID DNA-binding domain;ARID DNA-binding domain superfamily;Domain of unknown function DUF1747;FACT complex subunit POB3-like, N-terminal PH domain;High mobility group box domain;High mobility group box domain superfamily;PH-like domain superfamily;SSRP1 domain;SSRP1 domain superfamily;Structure-specific recognition protein;	DNA binding;DNA repair;DNA replication;DNA-binding transcription factor activity;FACT complex;four-way junction DNA binding;glucosinolate metabolic process;histone binding;karyogamy;nuclear chromatin;nuclear euchromatin;nucleosome binding;nucleus;polar nucleus fusion;pollen germination;pollen tube;pollen tube growth;regulation of transcription, DNA-templated;transcription factor binding;transcrip…
Q2V4A3.1	Homologous	90	19.8097	63.8967	6.97267	Q2V4A4.1(118.1);	Defensin-like protein 293	extracellular region;killing of cells of other organism;defense response to fungus;	F4HWL4.1(13.9);	Aminoacyl-tRNA synthetase, class Ic;Rossmann-like alpha/beta/alpha sandwich fold;	ATP binding;cytosol;tRNA aminoacylation for protein translation;tyrosine-tRNA ligase activity;
Q3E9I4.1	Single-copy	103	34.6487	56.1437	6.93342		CLAVATA3/ESR (CLE)-related protein 22	extracellular space;maintenance of root meristem identity;phloem or xylem histogenesis;receptor serine/threonine kinase binding;cell-cell signaling involved in cell fate commitment;apoplast;root development;	Q8L7Q7.2(14.6);Q9LXD9.1(14.5);	Invertase/pectin methylesterase inhibitor domain superfamily;Pectin lyase fold;Pectin lyase fold/virulence factor;Pectinesterase inhibitor domain;Pectinesterase, catalytic;	aspartyl esterase activity;cell wall;cell wall modification;extracellular region;integral component of membrane;pectin catabolic process;pectinesterase activity;pectinesterase inhibitor activity;plasma membrane;
Q3EBM6.1	Homologous	86	38.6957	54.5628	6.81025	P0DN99.1(96.8);	Precursor of CEP4	hormone activity;extracellular region;response to osmotic stress;cellular response to nitrogen starvation;response to salt stress;apoplast;root development;regulation of shoot system development;response to ammonium ion;regulation of leaf morphogenesis;nitrate import;regulation of root development;	A0A1I9LMX5.1(37.3);Q84K47.1(14.0);	AAA+ ATPase domain;ABC transporter A;ABC transporter, conserved site;ABC transporter-like;C-terminally encoded peptide;P-loop containing nucleoside triphosphate hydrolase;	ATP binding;ATPase activity;ATPase-coupled transmembrane transporter activity;apoplast;cellular response to nitrogen starvation;extracellular region;hormone activity;integral component of membrane;intracellular membrane-bounded organelle;lipid transport;lipid transporter activity;nitrate import;regulation of lateral root development;regulation of leaf morphogenesis;regulation of root development;…
Q3EBJ8.1	Homologous	119	236.324	34.7622	6.76904	Q3E6X9.1(36.5);Q9FZE7.1(32.2);	Putative F-box protein At2g39415		Q56XW8.2(103.2);Q9FM90.1(75.7);Q9SZ44.1(69.5);Q6NKX3.1(66.6);Q84W80.2(63.9);	F-box domain;F-box-like domain superfamily;FBD domain;Leucine-rich repeat 2;Leucine-rich repeat domain superfamily;	protein ubiquitination;
Q9FIR9.1	Homologous	94	43.6929	52.9468	6.71874	Q8L8S2.1(156.9);Q9SCK2.1(142.4);Q9SCK1.1(113.2);	Protein RESPONSE TO LOW SULFUR 2	defense response to oomycetes;response to salt stress;chloroplast organization;cellular response to sulfur starvation;regulation of defense response;defense response to bacterium;positive regulation of transcription, DNA-templated;regulation of response to osmotic stress;cellular oxidant detoxification;	Q9SVR0.1(13.7);Q9SFU1.1(13.0);Q9S9Q9.2(12.7);Q9LRX8.1(12.3);Q9AST1.1(11.9);	BTB/POZ domain;NPH3 domain;Nucleotide-binding alpha-beta plait domain superfamily;RNA recognition motif domain;RNA-binding domain superfamily;Ribosomal protein L13;Ribosomal protein L13 superfamily;Ribosomal protein L13, conserved site;Ribosomal protein L13, eukaryotic/archaeal;SKP1/BTB/POZ domain superfamily;Zinc finger, RanBP2-type;Zinc finger, RanBP2-type superfamily;	RNA binding;cytosol;cytosolic large ribosomal subunit;cytosolic ribosome;mRNA binding;metal ion binding;negative regulation of translation;nucleus;plasma membrane;plasmodesma;polysomal ribosome;protein ubiquitination;ribosome;structural constituent of ribosome;translation;
Q9LS43.1	Homologous	133	49.2555	51.4053	6.63794	P0CW98.1(112.9);	Protein PLANT CADMIUM RESISTANCE 7	integral component of membrane;	Q8S8T8.1(79.4);Q8L7E9.1(49.4);Q3EBY6.1(46.8);	Adaptor protein Cbl, N-terminal domain superfamily;PLAC8 motif-containing protein;	calcium channel activity;calcium ion transport;carbohydrate homeostasis;cell surface receptor signaling pathway;cellular response to mechanical stimulus;integral component of membrane;integral component of plasma membrane;osmosensory signaling pathway;plasma membrane;post-embryonic root development;
Q9C8S6.1	Single-copy	147	330.397	30.8122	6.43563		16 kDa phloem protein 2	RNA binding;defense response;	A0JJX5.1(68.2);Q8L706.1(64.9);Q9FL59.1(50.9);Q9ZVT9.4(49.8);Q7XA06.1(48.4);Q9C8H3.1(48.0);Q9M2R0.1(47.3);Q9SKR2.2(43.2);	C2 domain;C2 domain superfamily;GRAM domain;PH-like domain superfamily;Phosphoribosyltransferase C-terminal;Synaptotagmin, SMP domain;Synaptotagmin-like mitochondrial-lipid-binding domain;VASt domain;	Golgi apparatus;Golgi membrane;cell wall;cellular protein localization;cytoplasm;cytosol;endocytosis;endomembrane system;endoplasmic reticulum;endoplasmic reticulum membrane;endosome;endosome membrane;flower development;integral component of membrane;intracellular organelle;lipid binding;lipid transport;long-day photoperiodism, flowering;metal ion binding;plasma membrane;plasmodesma;plasmodesmata…
Q9LV97.1	Single-copy	106	7.26022	89.3623	6.34497		CLAVATA3/ESR (CLE)-related protein 21	extracellular space;cell-cell signaling involved in cell fate commitment;apoplast;system development;	O48722.2(10.2);	Haem oxygenase (decyclizing), plant;Haem oxygenase-like;Haem oxygenase-like, multi-helical;	chloroplast;heme oxidation;heme oxygenase (decyclizing) activity;photosynthesis;
Q1G3I7.1	Single-copy	138	64.6393	47.7363	6.29634		F-box protein At4g12382		O49624.3(37.9);Q9SUG4.2(37.3);O65454.2(35.2);O49316.1(34.9);	Domain unknown function DUF295;F-box domain;F-box-like domain superfamily;
Q9FLP6.1	Homologous	103	132.561	39.9689	6.26825	P55852.2(171.3);Q9FLP5.1(90.7);B3H5R8.1(79.7);Q9FKC5.1(73.6);Q3E8A8.2(72.1);Q8VZI7.1(70.9);Q9FKC6.1(59.4);	Small ubiquitin-related modifier 2	nucleus;cytoplasm;protein sumoylation;protein tag;ubiquitin-like protein ligase binding;	Q8H159.2(36.1);P0CH32.1(32.3);Q3E7T8.2(29.0);Q1EC66.1(28.6);P0CH33.1(24.3);Q9SHE7.3(21.2);Q3E7K8.1(19.5);Q8RUC6.3(18.0);Q39256.1(17.6);Q9FHQ6.1(16.5);	Nedd8-like ubiquitin;Ubiquitin conserved site;Ubiquitin domain;Ubiquitin-like domain;Ubiquitin-like domain superfamily;	cell wall;cellular protein modification process;cytoplasm;cytosol;endoplasmic reticulum;ethylene biosynthetic process;modification-dependent protein catabolic process;nucleolus;nucleus;plasma membrane;plastid;protein neddylation;protein tag;protein ubiquitination;response to UV-B;response to auxin;response to salicylic acid;ubiquitin protein ligase binding;ubiquitin-dependent protein catabolic pr…
Q9ZUU8.1	Single-copy	114	42.9429	52.3009	6.25047		SNF1-related protein kinase regulatory subunit beta-3	cytoplasm;carbohydrate metabolic process;chloroplast;chloroplast starch grain;response to sucrose;protein kinase regulator activity;nucleotide-activated protein kinase complex;cellular response to nitrogen levels;maltose binding;	Q84VQ1.1(89.8);Q9SCY5.1(83.7);	AMP-activated protein kinase, glycogen-binding domain;ASC domain superfamily;Association with the SNF1 complex (ASC) domain;Immunoglobulin E-set;Immunoglobulin-like fold;SNF1-related protein kinase regulatory subunit beta-1;SNF1-related protein kinase regulatory subunit beta-2;	ATP binding;carbohydrate metabolic process;fatty acid biosynthetic process;nitrate assimilation;plasma membrane;
O64725.1	Homologous	72	49.9613	50.3875	6.16182	Q9M9R9.1(127.6);	NADH dehydrogenase [ubiquinone] 1 beta subcomplex subunit 3-A	mitochondrion;mitochondrial respiratory chain complex I;integral component of membrane;electron transport chain;mitochondrial respiratory chain complex I assembly;	Q94A03.1(12.1);Q8VZV7.1(12.1);Q940J9.1(12.0);	Phosphatidate cytidylyltransferase;Putative S-adenosyl-L-methionine-dependent methyltransferase;S-adenosyl-L-methionine-dependent methyltransferase;	CDP-diacylglycerol biosynthetic process;Golgi apparatus;Golgi cis cisterna;Golgi membrane;Golgi trans cisterna;chloroplast membrane;chloroplast thylakoid membrane;cytoplasm;endosome;integral component of membrane;methylation;methyltransferase activity;phosphatidate cytidylyltransferase activity;phosphatidylglycerol biosynthetic process;plant-type cell wall;plastid;trans-Golgi network;vacuolar mem…
P93047.1	Homologous	141	80.1892	44.8979	6.02584	O49596.1(229.9);Q42344.1(125.4);O49597.1(92.6);	High mobility group B protein 3	chromatin;DNA binding;chromatin binding;DNA-binding transcription factor activity;nucleus;cytosol;chromatin assembly or disassembly;structural constituent of chromatin;	Q05153.2(51.4);Q9MAT6.1(24.2);Q9LTT3.1(23.6);Q9LG02.2(21.6);Q9SGS2.1(20.2);	ARID DNA-binding domain;ARID DNA-binding domain superfamily;Domain of unknown function DUF1747;FACT complex subunit POB3-like, N-terminal PH domain;High mobility group box domain;High mobility group box domain superfamily;PH-like domain superfamily;SSRP1 domain;SSRP1 domain superfamily;Structure-specific recognition protein;	DNA binding;DNA repair;DNA replication;DNA-binding transcription factor activity;FACT complex;four-way junction DNA binding;glucosinolate metabolic process;histone binding;karyogamy;nuclear chromatin;nuclear euchromatin;nucleosome binding;nucleus;polar nucleus fusion;pollen germination;pollen tube;pollen tube growth;regulation of transcription, DNA-templated;transcription factor binding;transcrip…
Q8LCW9.2	Homologous	112	30.7522	55.8795	6.02468	Q8LEQ0.2(207.7);O23095.2(193.4);Q9LXM8.1(44.6);Q9SLF7.1(37.9);P51407.2(36.8);Q9LUK2.1(32.4);Q9LVC9.1(31.0);	60S acidic ribosomal protein P1-1	cytoplasmic translation;structural constituent of ribosome;nucleus;cytosol;plasma membrane;translational elongation;cytosolic large ribosomal subunit;cytosolic ribosome;protein kinase activator activity;polysomal ribosome;ribonucleoprotein complex binding;	O80983.2(12.6);Q94BV7.1(12.1);	AAA ATPase, AAA+ lid domain;AAA+ ATPase domain;ATPase, AAA-type, conserved site;ATPase, AAA-type, core;EF-Hand 1, calcium-binding site;EF-hand domain;EF-hand domain pair;FAD/NAD(P)-binding domain;FAD/NAD(P)-binding domain superfamily;P-loop containing nucleoside triphosphate hydrolase;Peptidase M41;Peptidase M41-like;Peptidase, FtsH;	ATP binding;ATP-dependent peptidase activity;calcium ion binding;integral component of membrane;meristem maintenance;metal ion binding;metalloendopeptidase activity;mitochondrial inner membrane;mitochondrial intermembrane space;mitochondrion;oxidation-reduction process;oxidoreductase activity;peroxisome;plastid;proteolysis;
Q1PDG8.1	Homologous	82	15.2174	65.7573	6.01843	O82377.2(48.5);A8MQY8.1(40.0);A8MR88.1(34.5);A8MSA6.1(30.0);	EMBRYO SURROUNDING FACTOR 1-like protein 10		Q9FFU7.1(12.2);	F-box domain;F-box-like domain superfamily;FBD domain;
Q9ZNV4.1	Homologous	132	247.56	32.9001	5.91493	Q9ZWT2.1(135.9);Q42342.2(133.7);O48845.1(123.5);Q9FDW8.1(113.5);O22704.1(50.0);	Cytochrome B5 isoform C	endoplasmic reticulum membrane;cytosol;integral component of membrane;heme binding;metal ion binding;oxidation-reduction process;	P11035.1(92.1);P11832.3(84.9);Q9ZRP7.1(65.7);Q3EBF7.1(62.8);	Cytochrome b5, heme-binding site;Cytochrome b5-like heme/steroid binding domain;Cytochrome b5-like heme/steroid binding domain superfamily;Eukaryotic molybdopterin oxidoreductase;FAD-binding domain, ferredoxin reductase-type;Fatty acid desaturase;Fatty acid desaturase domain;Ferredoxin-NADP reductase (FNR), nucleotide-binding domain;Flavoprotein pyridine nucleotide cytochrome reductase;Flavoprote…	FAD binding;cellular response to cold;cytosol;endoplasmic reticulum;endoplasmic reticulum membrane;heme binding;integral component of membrane;lipid metabolic process;metal ion binding;molybdenum ion binding;molybdopterin cofactor binding;nitrate assimilation;nitrate reductase (NADH) activity;nitrate reductase (NADPH) activity;nitrate reductase activity;nitric oxide biosynthetic process;nucleus;p…
Q42202.2	Homologous	128	277.879	31.632	5.86532	B9DHA6.1(260.8);O65381.1(73.9);	Ubiquitin-60S ribosomal protein L40-2	structural constituent of ribosome;nucleus;cytoplasm;cytosol;ribosome;translation;protein ubiquitination;modification-dependent protein catabolic process;protein tag;ubiquitin protein ligase binding;	Q9ZPY9.1(72.7);Q9SGW8.2(56.2);Q9FNF8.1(53.2);Q9SU29.1(52.2);Q84L30.2(41.8);Q9SII9.2(36.8);Q84L31.2(36.0);Q84L32.2(35.9);	HECT domain;HECT, E3 ligase catalytic domain;Heat shock chaperonin-binding;Phosphatidylinositol 3-/4-kinase, catalytic domain;Protein kinase-like domain superfamily;UBA-like superfamily;UV excision repair protein Rad23;Ubiquilin;Ubiquitin domain;Ubiquitin-associated domain;Ubiquitin-like domain;Ubiquitin-like domain superfamily;XPC-binding domain;XPC-binding domain superfamily;	1-phosphatidylinositol 4-kinase activity;ATP binding;carbohydrate binding;cellular response to hypoxia;cytoplasm;cytosol;damaged DNA binding;kinase activity;leaf senescence;membrane;mitochondrion;nucleoplasm;nucleotide-excision repair;nucleus;peroxisome;phosphatidylinositol binding;phosphatidylinositol phosphorylation;plastid;polyubiquitin modification-dependent protein binding;positive regulatio…
B9DHA6.1	Homologous	128	277.879	31.632	5.86532	Q42202.2(260.8);O65381.1(73.9);	Ubiquitin-60S ribosomal protein L40-1	structural constituent of ribosome;nucleus;nucleolus;cytoplasm;endoplasmic reticulum;translation;protein ubiquitination;modification-dependent protein catabolic process;cytosolic large ribosomal subunit;protein tag;ubiquitin protein ligase binding;	Q9ZPY9.1(72.7);Q9SGW8.2(56.2);Q9FNF8.1(53.2);Q9SU29.1(52.2);Q84L30.2(41.8);Q9SII9.2(36.8);Q84L31.2(36.0);Q84L32.2(35.9);	HECT domain;HECT, E3 ligase catalytic domain;Heat shock chaperonin-binding;Phosphatidylinositol 3-/4-kinase, catalytic domain;Protein kinase-like domain superfamily;UBA-like superfamily;UV excision repair protein Rad23;Ubiquilin;Ubiquitin domain;Ubiquitin-associated domain;Ubiquitin-like domain;Ubiquitin-like domain superfamily;XPC-binding domain;XPC-binding domain superfamily;	1-phosphatidylinositol 4-kinase activity;ATP binding;carbohydrate binding;cellular response to hypoxia;cytoplasm;cytosol;damaged DNA binding;kinase activity;leaf senescence;membrane;mitochondrion;nucleoplasm;nucleotide-excision repair;nucleus;peroxisome;phosphatidylinositol binding;phosphatidylinositol phosphorylation;plastid;polyubiquitin modification-dependent protein binding;positive regulatio…
Q9C9K2.1	Homologous	134	15.832	64.5097	5.79593	O22914.1(70.8);Q9LZP9.1(69.6);	Calvin cycle protein CP12-3, chloroplastic	copper ion binding;chloroplast;nickel cation binding;reductive pentose-phosphate cycle;protein-containing complex;cellular response to heat;cellular response to anoxia;negative regulation of reductive pentose-phosphate cycle;	P25857.2(23.0);	Domain of unknown function CP12;Glyceraldehyde 3-phosphate dehydrogenase, NAD(P) binding domain;Glyceraldehyde 3-phosphate dehydrogenase, active site;Glyceraldehyde 3-phosphate dehydrogenase, catalytic domain;Glyceraldehyde-3-phosphate dehydrogenase, type I;Glyceraldehyde/Erythrose phosphate dehydrogenase family;NAD(P)-binding domain superfamily;	NAD binding;NADP binding;apoplast;chloroplast;chloroplast envelope;chloroplast membrane;chloroplast stroma;chloroplast thylakoid membrane;glucose metabolic process;glyceraldehyde-3-phosphate dehydrogenase (NAD+) (phosphorylating) activity;glyceraldehyde-3-phosphate dehydrogenase (NADP+) (phosphorylating) activity;nucleus;reductive pentose-phosphate cycle;response to cadmium ion;response to cold;r…
Q6IWA9.1	Single-copy	124	17.603	62.804	5.76467		CLAVATA3/ESR (CLE)-related protein 45	extracellular space;multicellular organism development;auxin-activated signaling pathway;phloem development;regulation of auxin mediated signaling pathway;receptor serine/threonine kinase binding;cell-cell signaling involved in cell fate commitment;apoplast;	Q9S775.1(11.1);	Chromo domain;Chromo-like domain superfamily;Chromo/chromo shadow domain;Domain of unknown function DUF1086;Domain of unknown function DUF1087;Helicase superfamily 1/2, ATP-binding domain;Helicase, C-terminal;P-loop containing nucleoside triphosphate hydrolase;SNF2-like, N-terminal domain superfamily;SNF2-related, N-terminal domain;Zinc finger, PHD-finger;Zinc finger, PHD-type;Zinc finger, PHD-ty…	ATP binding;DNA binding;cell division;chromatin remodeling;cytokinin-activated signaling pathway;helicase activity;metal ion binding;negative regulation of abscisic acid-activated signaling pathway;negative regulation of transcription, DNA-templated;nucleus;regulation of lateral root development;response to auxin;response to gibberellin;root development;
P62090.2	Single-copy	81	32.6805	54.0457	5.51062		Photosystem I iron-sulfur center	electron transfer activity;chloroplast;photosystem I;chloroplast stromal thylakoid;chloroplast thylakoid;chloroplast thylakoid membrane;plastid;photosynthetic electron transport in photosystem I;photosynthesis;metal ion binding;4 iron, 4 sulfur cluster binding;	Q9LID6.1(12.1);Q8LPJ4.1(11.2);	4Fe-4S ferredoxin, iron-sulphur binding, conserved site;4Fe-4S ferredoxin-type, iron-sulphur binding domain;AAA+ ATPase domain;ABC transporter, conserved site;ABC transporter-like;P-loop containing nucleoside triphosphate hydrolase;RLI, domain 1;RLI1;RNase L inhibitor RLI, possible metal-binding domain;	4 iron, 4 sulfur cluster binding;ATP binding;ATPase activity;cytosol;iron ion binding;membrane;ribosomal small subunit binding;ribosomal subunit export from nucleus;translational initiation;translational termination;
Q9SI57.1	Single-copy	123	12.5351	67.4894	5.48491		Probable root meristem growth factor 8	extracellular region;growth factor activity;cell differentiation;	Q9XI77.2(13.4);	Xyloglucan fucosyltransferase;	Golgi apparatus;Golgi cisterna membrane;cell wall organization;fucosyltransferase activity;galactoside 2-alpha-L-fucosyltransferase activity;integral component of membrane;protein glycosylation;xyloglucan biosynthetic process;
Q9CA40.1	Single-copy	147	37.6093	52.2204	5.43662		Nudix hydrolase 1	NAD+ diphosphatase activity;cytosol;dGTP catabolic process;cellular response to DNA damage stimulus;8-oxo-7,8-dihydroguanosine triphosphate pyrophosphatase activity;dihydroneopterin triphosphate pyrophosphohydrolase activity;8-oxo-7,8-dihydrodeoxyguanosine triphosphate pyrophosphatase activity;metal ion binding;	P93740.2(22.7);Q94B74.1(19.9);Q9SJC4.1(19.1);Q6NPD7.1(17.9);Q94A82.1(17.9);Q9SJC6.3(16.7);Q8GW31.1(13.9);	NADH pyrophosphatase-like, N-terminal;NUDIX hydrolase;NUDIX hydrolase domain;NUDIX hydrolase, conserved site;NUDIX hydrolase-like domain superfamily;Nudix hydrolase 6-like;Nudix hydrolase, N-terminal;Pre-nudix hydrolase domain;Zinc ribbon, NADH pyrophosphatase;mRNA decapping protein 2, Box A domain;mRNA decapping protein 2, Box A domain superfamily;	ADP-ribose diphosphatase activity;ATP binding;FAD diphosphatase activity;NAD binding;NAD catabolic process;NAD+ diphosphatase activity;NADH metabolic process;NADH pyrophosphatase activity;NADP catabolic process;P-body;chloroplast;cytoplasm;cytosol;deadenylation-dependent decapping of nuclear-transcribed mRNA;deadenylation-independent decapping of nuclear-transcribed mRNA;flavin-containing compoun…
Q9C9B2.1	Single-copy	145	228.939	32.6504	5.33827		Actin-related protein 4A	chromatin binding;regulation of transcription by RNA polymerase II;SWI/SNF complex;NuA4 histone acetyltransferase complex;ATP-dependent chromatin remodeling;histone H4 acetylation;	Q8RYC2.1(82.8);P53496.1(82.5);P53492.1(82.5);P0CJ46.1(82.1);P0CJ47.1(82.1);Q96293.2(82.1);P53494.1(82.0);P53497.1(82.0);Q96292.1(82.0);Q9LSD6.1(69.7);	Actin family;Actin, conserved site;Actin-related protein 2;Actin/actin-like conserved site;	ATP binding;Arp2/3 complex-mediated actin nucleation;Arp2/3 protein complex;actin binding;actin cytoskeleton organization;actin filament organization;actin filament-based process;cell division;cell morphogenesis;cell wall;chloroplast envelope;chloroplast stroma;copper ion binding;cytoplasm;cytoskeleton;cytosol;developmental growth;endoplasmic reticulum;mRNA binding;mitochondrion;multicellular org…
O23095.2	Homologous	113	21.8256	57.9292	5.02466	Q8LEQ0.2(195.7);Q8LCW9.2(193.5);Q9LXM8.1(41.2);Q9SLF7.1(41.1);P51407.2(38.3);Q9SVZ6.1(31.8);Q9LVC9.1(30.4);Q9LUK2.1(30.1);	60S acidic ribosomal protein P1-2	cytoplasmic translation;structural constituent of ribosome;nucleus;cytosol;translational elongation;cytosolic large ribosomal subunit;cytosolic ribosome;protein kinase activator activity;ribonucleoprotein complex binding;	O65517.1(11.6);O80983.2(10.3);	AAA ATPase, AAA+ lid domain;AAA+ ATPase domain;ATPase, AAA-type, conserved site;ATPase, AAA-type, core;P-loop containing nucleoside triphosphate hydrolase;Peptidase M41;Peptidase M41-like;Peptidase, FtsH;SHI protein family;SHORT INTERNODES, C-terminal;Zinc finger, lateral root primordium type 1;	ATP binding;ATP-dependent peptidase activity;DNA binding;anther development;auxin biosynthetic process;auxin-activated signaling pathway;integral component of membrane;meristem maintenance;metal ion binding;metalloendopeptidase activity;mitochondrial inner membrane;mitochondrion;nucleus;plastid;pollen development;positive regulation of transcription, DNA-templated;proteolysis;
Q3EAV6.1	Homologous	111	56.7941	46.6541	5.01481	Q9SW07.1(55.5);Q3E965.2(55.2);Q9FHH5.1(50.9);	Protein GLUTAMINE DUMPER 6	amino acid transport;integral component of membrane;regulation of amino acid export;	Q9FHX3.1(20.3);F4IB81.1(15.5);Q9FYQ8.1(10.7);	Concanavalin A-like lectin/glucanase domain superfamily;Legume lectin domain;Legume lectin, beta chain, Mn/Ca-binding site;LysM domain;LysM domain superfamily;Nonaspanin (TM9SF);Protein kinase domain;Protein kinase, ATP binding site;Protein kinase-like domain superfamily;Serine-threonine/tyrosine-protein kinase, catalytic domain;Serine/threonine-protein kinase, active site;	ATP binding;Golgi apparatus;Golgi medial cisterna;Golgi membrane;abscisic acid-activated signaling pathway;carbohydrate binding;defense response;defense response to bacterium;defense response to fungus;defense response to oomycetes;endosome;endosome membrane;innate immune response;integral component of membrane;membrane;negative regulation of defense response;plasma membrane;plastid;positive regu…
Q8S8N3.1	Homologous	81	19.9462	58.6247	4.84242	Q8S8N2.2(123.2);Q8S8N1.1(33.7);	CLAVATA3/ESR (CLE)-related protein 6	extracellular space;multicellular organism development;cell-cell signaling involved in cell fate commitment;apoplast;	O64793.3(13.1);	Bulb-type lectin domain;Bulb-type lectin domain superfamily;PAN/Apple domain;Protein kinase domain;Protein kinase-like domain superfamily;S-receptor-like serine/threonine-protein kinase;Serine-threonine/tyrosine-protein kinase, catalytic domain;Serine/threonine-protein kinase, active site;	ATP binding;calmodulin binding;carbohydrate binding;integral component of membrane;plasma membrane;protein serine/threonine kinase activity;
Q8L8S2.1	Homologous	92	44.9836	48.8424	4.83908	Q9FIR9.1(156.5);Q9SCK2.1(132.8);Q9SCK1.1(102.8);	Protein RESPONSE TO LOW SULFUR 4	regulation of flower development;regulation of short-day photoperiodism, flowering;cellular oxidant detoxification;	Q9SVR0.1(13.7);Q9SFU1.1(13.0);Q9S9Q9.2(12.7);Q9LRX8.1(12.3);Q9AST1.1(11.9);	BTB/POZ domain;NPH3 domain;Nucleotide-binding alpha-beta plait domain superfamily;RNA recognition motif domain;RNA-binding domain superfamily;Ribosomal protein L13;Ribosomal protein L13 superfamily;Ribosomal protein L13, conserved site;Ribosomal protein L13, eukaryotic/archaeal;SKP1/BTB/POZ domain superfamily;Zinc finger, RanBP2-type;Zinc finger, RanBP2-type superfamily;	RNA binding;cytosol;cytosolic large ribosomal subunit;cytosolic ribosome;mRNA binding;metal ion binding;negative regulation of translation;nucleus;plasma membrane;plasmodesma;polysomal ribosome;protein ubiquitination;ribosome;structural constituent of ribosome;translation;
Q8W191.1	Single-copy	149	21.5246	57.5825	4.82435		Transcription factor HY5-like	DNA-binding transcription factor activity;nucleus;red, far-red light phototransduction;red or far-red light signaling pathway;regulation of photomorphogenesis;response to red light;response to far red light;response to UV-B;transcription regulatory region DNA binding;response to karrikin;	E3VNM4.1(26.4);B9DGI8.1(23.5);	Basic leucine-zipper, C-terminal;Basic-leucine zipper domain;Transcription factor TGA like domain;	DNA binding;DNA-binding transcription factor activity;anther development;cellular response to abscisic acid stimulus;cellular response to glucose stimulus;cellular response to starvation;entrainment of circadian clock;hydrogen peroxide mediated signaling pathway;identical protein binding;kinase binding;nucleus;protein heterodimerization activity;protein homodimerization activity;protein self-asso…
Q8GYD1.1	Homologous	146	215.61	32.2186	4.81974	Q39239.2(30.4);	Protein disulfide-isomerase 5-1	cell;cell redox homeostasis;	Q9MAU6.2(119.6);Q9XI01.1(105.5);Q9SRG3.1(100.5);Q9FF55.1(89.4);Q8VWG7.1(74.8);	Disulphide isomerase;Hsp70-interacting protein, N-terminal;Protein disulphide isomerase;Tetratricopeptide repeat;Tetratricopeptide repeat-containing domain;Tetratricopeptide-like helical domain superfamily;Thioredoxin domain;Thioredoxin, conserved site;Thioredoxin-like superfamily;	Golgi apparatus;Hsp70 protein binding;cell;cell redox homeostasis;cell wall;chaperone cofactor-dependent protein refolding;chaperone-mediated protein folding;chloroplast;chloroplast stroma;cytosol;embryo development ending in seed dormancy;endoplasmic reticulum;endoplasmic reticulum lumen;extracellular region;heat acclimation;heat shock protein binding;identical protein binding;lytic vacuole with…
Q9LK18.2	Single-copy	137	336.043	27.6927	4.81662		Putative pumilio homolog 25	RNA binding;cytoplasm;regulation of translation;	Q9SS47.2(43.2);Q9LJX4.2(36.4);Q9ZW07.1(35.5);Q9ZW06.1(35.0);Q9ZW02.1(34.6);Q9LM20.2(32.6);Q1PFN9.1(32.0);Q9C5E7.1(31.2);Q9C9R6.2(27.7);Q9LSS8.2(27.5);	Armadillo-like helical;Armadillo-type fold;Nucleic acid binding NABP;Pumilio RNA-binding repeat;Pumilio homology domain;Pumilio, RNA binding domain;	3'-UTR-mediated mRNA destabilization;RNA binding;chloroplast;cytoplasm;cytosol;defense response to virus;drought recovery;mRNA 3'-UTR binding;mRNA binding;negative regulation of seed dormancy process;plasma membrane;posttranscriptional regulation of gene expression;regulation of translation;response to osmotic stress;response to salt stress;single-stranded RNA binding;vacuole;
O49597.1	Homologous	125	95.2569	40.648	4.80482	Q42344.1(149.1);O49596.1(95.0);P93047.1(91.9);	High mobility group B protein 5	chromatin;DNA binding;chromatin binding;DNA-binding transcription factor activity;nucleus;cytoplasm;chromatin assembly or disassembly;structural constituent of chromatin;	Q05153.2(51.4);Q9MAT6.1(24.2);Q9LTT3.1(23.6);Q9LG02.2(21.6);Q9SGS2.1(20.2);	ARID DNA-binding domain;ARID DNA-binding domain superfamily;Domain of unknown function DUF1747;FACT complex subunit POB3-like, N-terminal PH domain;High mobility group box domain;High mobility group box domain superfamily;PH-like domain superfamily;SSRP1 domain;SSRP1 domain superfamily;Structure-specific recognition protein;	DNA binding;DNA repair;DNA replication;DNA-binding transcription factor activity;FACT complex;four-way junction DNA binding;glucosinolate metabolic process;histone binding;karyogamy;nuclear chromatin;nuclear euchromatin;nucleosome binding;nucleus;polar nucleus fusion;pollen germination;pollen tube;pollen tube growth;regulation of transcription, DNA-templated;transcription factor binding;transcrip…
P92512.1	Single-copy	120	86.3702	41.64	4.78573		Uncharacterized mitochondrial protein AtMg00710	mitochondrion;	Q94HW2.1(29.0);Q9ZT94.1(28.8);	GAG-pre-integrase domain;Integrase, catalytic core;Reverse transcriptase, RNA-dependent DNA polymerase;Ribonuclease H superfamily;Ribonuclease H-like superfamily;	DNA integration;DNA recombination;RNA-directed DNA polymerase activity;aspartic-type endopeptidase activity;endonuclease activity;metal ion binding;nucleic acid binding;
Q8S8F7.1	Single-copy	107	11.7263	65.9178	4.68276		Protein phosphatase 1 regulatory subunit INH3	protein phosphatase type 1 complex;protein serine/threonine phosphatase inhibitor activity;nucleus;protein phosphatase 1 binding;embryo development ending in seed dormancy;negative regulation of phosphoprotein phosphatase activity;negative regulation of protein dephosphorylation;	B9DFG5.1(12.4);	Protein kinase domain;Protein kinase, ATP binding site;Protein kinase-like domain superfamily;Serine-threonine/tyrosine-protein kinase, catalytic domain;Tyrosine-protein kinase, active site;Tyrosine-protein kinase, catalytic domain;	ATP binding;cytosol;non-membrane spanning protein tyrosine kinase activity;plasma membrane;protein kinase binding;protein phosphorylation;transmembrane receptor protein serine/threonine kinase activity;
P57752.1	Single-copy	92	134.614	36.6587	4.63325		Acyl-CoA-binding domain-containing protein 6	fatty-acyl-CoA binding;response to hypoxia;nucleus;cytosol;plasma membrane;lipid transport;response to cold;response to absence of light;phosphatidylcholine binding;response to freezing;	Q9SM23.2(46.2);Q9STP8.1(39.0);Q9MA55.1(34.0);Q8RWD9.1(30.7);	Acyl-CoA binding protein superfamily;Acyl-CoA-binding protein, ACBP;Ankyrin repeat;Ankyrin repeat-containing domain;Ankyrin repeat-containing domain superfamily;FERM/acyl-CoA-binding protein superfamily;Kelch repeat type 1;Kelch-type beta propeller;	cytoplasm;cytosol;endoplasmic reticulum;endoplasmic reticulum membrane;extracellular region;fatty-acyl-CoA binding;glyoxysome;integral component of membrane;lead ion binding;lipid binding;lipid metabolic process;lipid transport;nucleus;peroxisomal membrane;phosphatidic acid binding;plant-type cell wall;plasma membrane;plastid;regulation of seed germination;regulation of seedling development;respo…
Q2V300.1	Homologous	101	21.6554	56.9168	4.60759	Q2V304.1(64.6);Q2V3K4.1(54.8);Q2V3K2.1(51.4);Q2V306.1(48.6);Q2V305.1(46.4);Q2V3K7.1(35.5);	Defensin-like protein 222	extracellular region;killing of cells of other organism;defense response to fungus;	Q9ZUT8.1(13.2);	AAA+ ATPase domain;ABC transporter-like;ABC-2 type transporter;ABC-transporter N-terminal domain;ATP-binding cassette transporter, PDR-like subfamily G, domain 1;ATP-binding cassette transporter, PDR-like subfamily G, domain 2;P-loop containing nucleoside triphosphate hydrolase;Plant PDR ABC transporter associated;	ATP binding;ATPase activity;ATPase-coupled transmembrane transporter activity;integral component of membrane;plasma membrane;transmembrane transport;
Q8LFH7.1	Homologous	95	16.3249	60.5211	4.55968	Q8LEM8.1(177.5);Q43292.2(175.2);	60S ribosomal protein L37-1	RNA binding;mRNA binding;structural constituent of ribosome;extracellular region;translation;rRNA binding;cytosolic large ribosomal subunit;metal ion binding;	Q9SU25.1(12.1);	Transcription Factor IIF, Rap30/Rap74, interaction;Transcription initiation factor IIF, alpha subunit;Winged helix DNA-binding domain superfamily;Winged helix-like DNA-binding domain superfamily;	DNA binding;nucleus;positive regulation of transcription elongation from RNA polymerase II promoter;protein C-terminus binding;transcription initiation from RNA polymerase II promoter;
Q8LEM8.1	Homologous	95	16.3249	60.4611	4.53999	Q43292.2(180.5);Q8LFH7.1(177.2);	60S ribosomal protein L37-3	RNA binding;structural constituent of ribosome;cytosol;translation;rRNA binding;cytosolic large ribosomal subunit;metal ion binding;	Q9SU25.1(12.1);	Transcription Factor IIF, Rap30/Rap74, interaction;Transcription initiation factor IIF, alpha subunit;Winged helix DNA-binding domain superfamily;Winged helix-like DNA-binding domain superfamily;	DNA binding;nucleus;positive regulation of transcription elongation from RNA polymerase II promoter;protein C-terminus binding;transcription initiation from RNA polymerase II promoter;
Q9STJ9.1	Homologous	130	9.76723	68.2969	4.46876	Q3EA33.1(95.1);	Zinc finger A20 and AN1 domain-containing stress-associated protein 10	DNA binding;nucleus;cytoplasm;zinc ion binding;response to metal ion;response to manganese ion;response to zinc ion;response to nickel cation;cellular response to heat;cellular response to cold;cellular response to salt stress;	Q94B40.2(114.1);Q8H0X0.2(109.6);Q8VZ42.1(18.9);Q9SCM4.1(15.2);	AN1-like Zinc finger;Zinc finger C2H2-type;Zinc finger, A20-type;Zinc finger, AN1-type;	DNA binding;cellular response to hypoxia;cytoplasm;nucleic acid binding;nucleus;response to abscisic acid;response to chitin;response to salt stress;stress response to metal ion;transcription regulatory region DNA binding;zinc ion binding;
Q9SH14.1	Homologous	120	134.779	36.265	4.46576	Q8GWJ6.1(171.1);Q8LCS8.1(112.1);Q9MAB9.1(110.1);Q9LSD8.1(106.2);Q9SW27.1(103.4);	Membrane-anchored ubiquitin-fold protein 5	plasma membrane;	Q8H159.2(55.2);P0CH32.1(47.6);Q3E7T8.2(39.8);Q1EC66.1(39.7);P0CH33.1(31.4);Q9FHQ6.1(27.8);Q3E7K8.1(26.8);Q39256.1(24.8);	Ubiquitin conserved site;Ubiquitin domain;Ubiquitin-like domain;Ubiquitin-like domain superfamily;	cell wall;cellular protein modification process;cytoplasm;cytosol;modification-dependent protein catabolic process;nucleolus;nucleus;plasma membrane;plastid;protein tag;protein ubiquitination;response to UV-B;response to salicylic acid;ubiquitin protein ligase binding;ubiquitin-dependent protein catabolic process;vacuolar membrane;vacuole;
Q6DUW7.1	Homologous	99	10.159	67.5394	4.45769	Q6DUW9.1(66.2);Q6DUW6.1(38.7);Q6DUW8.2(35.6);	Protein IDA-LIKE 3	extracellular space;floral organ abscission;apoplast;	Q9LSS4.1(12.4);	Tetraspanin;Tetraspanin/Peripherin;	integral component of membrane;plasma membrane;plasmodesma;
Q2V305.1	Homologous	98	21.7806	56.2276	4.38774	Q2V304.1(143.2);Q2V306.1(136.3);Q2V3K4.1(48.7);Q2V300.1(47.4);Q2V3K2.1(46.5);Q2V3K7.1(39.6);	Defensin-like protein 219	extracellular region;killing of cells of other organism;defense response to fungus;	Q9ZUT8.1(13.2);	AAA+ ATPase domain;ABC transporter-like;ABC-2 type transporter;ABC-transporter N-terminal domain;ATP-binding cassette transporter, PDR-like subfamily G, domain 1;ATP-binding cassette transporter, PDR-like subfamily G, domain 2;P-loop containing nucleoside triphosphate hydrolase;Plant PDR ABC transporter associated;	ATP binding;ATPase activity;ATPase-coupled transmembrane transporter activity;integral component of membrane;plasma membrane;transmembrane transport;
Q9M2B0.1	Homologous	115	23.5049	54.8374	4.23118	Q940X7.1(209.2);Q9M9L0.3(58.1);	RING-box protein 1b	nucleus;cytoplasm;ubiquitin-dependent protein catabolic process;zinc ion binding;NEDD8 transferase activity;SCF-dependent proteasomal ubiquitin-dependent protein catabolic process;cullin-RING ubiquitin ligase complex;Cul2-RING ubiquitin ligase complex;Cul3-RING ubiquitin ligase complex;Cul7-RING ubiquitin ligase complex;nuclear SCF ubiquitin ligase complex;protein neddylation;ubiquitin protein li…	Q7X843.2(33.3);Q8LE94.1(31.9);	Hypoxia induced protein, domain;Zinc finger, RING-H2-type;Zinc finger, RING-type;Zinc finger, RING/FYVE/PHD-type;	cytoplasm;integral component of membrane;metal ion binding;protein ubiquitination;transferase activity;ubiquitin protein ligase binding;ubiquitin-protein transferase activity;zinc ion binding;
Q43292.2	Homologous	95	16.3249	59.3242	4.17695	Q8LEM8.1(180.3);Q8LFH7.1(174.7);	60S ribosomal protein L37-2	RNA binding;structural constituent of ribosome;nucleus;translation;rRNA binding;cytosolic large ribosomal subunit;cytosolic ribosome;metal ion binding;	Q9SU25.1(12.1);	Transcription Factor IIF, Rap30/Rap74, interaction;Transcription initiation factor IIF, alpha subunit;Winged helix DNA-binding domain superfamily;Winged helix-like DNA-binding domain superfamily;	DNA binding;nucleus;positive regulation of transcription elongation from RNA polymerase II promoter;protein C-terminus binding;transcription initiation from RNA polymerase II promoter;
O04211.1	Homologous	111	17.4539	57.9622	4.02841	O80877.1(77.4);Q8S8F5.1(67.4);Q94BS8.1(66.2);Q570U6.1(63.8);	Protein EARLY FLOWERING 4	nucleus;red, far-red light phototransduction;photoperiodism;entrainment of circadian clock;flower development;regulation of flower development;red or far-red light signaling pathway;response to red light;positive regulation of circadian rhythm;protein homodimerization activity;rhythmic process;photoperiodism, flowering;response to karrikin;	Q93VH6.1(13.6);Q9C615.1(12.7);Q9MAL9.1(12.1);	Late embryogenesis abundant protein, LEA_2 subgroup;SNARE;SS18 family;Syntaxin, N-terminal domain;Target SNARE coiled-coil homology domain;	SNAP receptor activity;SNARE binding;SNARE complex;cell division;cell population proliferation;endomembrane system;integral component of membrane;intracellular protein transport;leaf development;nucleus;positive regulation of transcription by RNA polymerase II;positive regulation of transcription, DNA-templated;transcription coactivator activity;vesicle docking;vesicle fusion;
Q8S8N2.2	Homologous	81	19.9462	56.1321	3.98766	Q8S8N3.1(123.7);Q8S8N1.1(34.1);	CLAVATA3/ESR (CLE)-related protein 5	extracellular space;multicellular organism development;receptor serine/threonine kinase binding;cell-cell signaling involved in cell fate commitment;apoplast;	O64793.3(13.1);	Bulb-type lectin domain;Bulb-type lectin domain superfamily;PAN/Apple domain;Protein kinase domain;Protein kinase-like domain superfamily;S-receptor-like serine/threonine-protein kinase;Serine-threonine/tyrosine-protein kinase, catalytic domain;Serine/threonine-protein kinase, active site;	ATP binding;calmodulin binding;carbohydrate binding;integral component of membrane;plasma membrane;protein serine/threonine kinase activity;
Q1G3Y0.1	Homologous	128	16.1126	58.8336	3.97393	Q8GYU0.1(31.4);	CRIB domain-containing protein RIC9	plasma membrane;regulation of growth;	Q9CAX8.1(22.8);	CRIB domain;CRIB domain superfamily;Rho GTPase activation protein;Rho GTPase-activating protein domain;	GTPase activator activity;response to anoxia;signal transduction;
P0DKJ2.1	Single-copy	50	19.0871	56.606	3.96265		Peptide encoded by miPEP319a	positive regulation of transcription, DNA-templated;positive regulation of production of miRNAs involved in gene silencing by miRNA;	Q9FJT2.1(13.1);	F-box domain;F-box-like domain superfamily;FBD domain;Leucine-rich repeat 2;Leucine-rich repeat domain superfamily;
Q8LEQ0.2	Homologous	113	21.8256	54.7221	3.89189	Q8LCW9.2(208.0);O23095.2(195.7);Q9LXM8.1(41.3);Q9SLF7.1(39.4);P51407.2(36.5);Q9LUK2.1(35.5);Q9LVC9.1(32.0);Q9SVZ6.1(31.5);	60S acidic ribosomal protein P1-3	cytoplasmic translation;structural constituent of ribosome;nucleus;cytosol;plasma membrane;translational elongation;plastid;cytosolic large ribosomal subunit;cytosolic ribosome;protein kinase activator activity;ribonucleoprotein complex binding;	O65517.1(11.6);O80983.2(10.3);	AAA ATPase, AAA+ lid domain;AAA+ ATPase domain;ATPase, AAA-type, conserved site;ATPase, AAA-type, core;P-loop containing nucleoside triphosphate hydrolase;Peptidase M41;Peptidase M41-like;Peptidase, FtsH;SHI protein family;SHORT INTERNODES, C-terminal;Zinc finger, lateral root primordium type 1;	ATP binding;ATP-dependent peptidase activity;DNA binding;anther development;auxin biosynthetic process;auxin-activated signaling pathway;integral component of membrane;meristem maintenance;metal ion binding;metalloendopeptidase activity;mitochondrial inner membrane;mitochondrion;nucleus;plastid;pollen development;positive regulation of transcription, DNA-templated;proteolysis;
Q9M0R7.1	Homologous	132	22.5982	54.2751	3.88376	Q9SZL4.1(40.7);Q9ZU51.2(38.0);	RING-H2 finger protein ATL39	zinc ion binding;integral component of membrane;protein ubiquitination;transferase activity;	Q9C7I1.1(100.3);	Zinc finger, RING-CH-type;Zinc finger, RING-type;Zinc finger, RING/FYVE/PHD-type;	integral component of membrane;protein ubiquitination;transferase activity;zinc ion binding;
P82787.2	Homologous	78	19.6991	55.8808	3.85966	P30224.3(68.4);O80995.1(65.0);Q9FI22.1(63.1);Q9FI23.1(60.7);O80994.1(59.8);Q9FZ31.1(44.2);P82782.1(31.0);	Defensin-like protein 19	extracellular region;defense response;killing of cells of other organism;defense response to fungus;	Q9LT96.1(12.3);	Leucine-rich repeat;Leucine-rich repeat domain superfamily;Leucine-rich repeat-containing N-terminal, plant-type;Protein kinase domain;Protein kinase, ATP binding site;Protein kinase-like domain superfamily;Serine-threonine/tyrosine-protein kinase, catalytic domain;Serine/threonine-protein kinase, active site;	ATP binding;integral component of membrane;plastid;protein serine/threonine kinase activity;
Q9C7F5.1	Homologous	126	50.4412	44.9898	3.82276	Q9FZK4.1(213.7);	Nuclear transport factor 2B	nucleus;nuclear envelope;cytoplasm;protein import into nucleus;nucleocytoplasmic transport;nuclear pore central transport channel;	Q9FME2.1(50.5);O80396.1(21.8);	NTF2-like domain superfamily;Nuclear transport factor 2;Nuclear transport factor 2, eukaryote;Nucleotide-binding alpha-beta plait domain superfamily;Protein kinase domain;Protein kinase, ATP binding site;Protein kinase-like domain superfamily;RNA recognition motif domain;RNA-binding domain superfamily;Ras GTPase-activating protein-binding protein;Serine/threonine-protein kinase, active site;	ATP binding;MAP kinase activity;MAP kinase kinase activity;abscisic acid-activated signaling pathway;activation of MAPK activity;activation of protein kinase activity;cytoplasm;cytosol;defense response, incompatible interaction;gene silencing by RNA;induced systemic resistance, ethylene mediated signaling pathway;induced systemic resistance, jasmonic acid mediated signaling pathway;mRNA binding;n…
F4JZT3.1	Homologous	139	471.555	21.6641	3.72296	Q9M8Y4.1(84.5);	Two-component response regulator 24	phosphorelay signal transduction system;nucleus;cytokinin-activated signaling pathway;	Q9C5U2.1(69.2);Q9C5U0.1(54.4);Q9C5U1.1(51.8);Q3S4A7.1(51.6);Q9SXL4.2(48.6);O22267.1(48.3);Q9ZTP3.1(46.1);O49397.1(32.0);Q9FXD6.1(32.0);	CHASE domain;CheY-like superfamily;Ethylene receptor;GAF domain;GAF-like domain superfamily;Histidine kinase domain;Histidine kinase/HSP90-like ATPase;Histidine kinase/HSP90-like ATPase superfamily;Homeobox-like domain superfamily;Myb domain;Myb domain, plants;PAS domain superfamily;Phosphoribosyltransferase domain;Response regulator B-type, plant;SANT/Myb domain;Signal transduction histidine kin…	ATP binding;DNA binding;DNA-binding transcription factor activity;abscisic acid-activated signaling pathway;carbohydrate homeostasis;cellular response to abscisic acid stimulus;cellular response to cold;cellular response to cytokinin stimulus;cellular response to hydrogen peroxide;cellular response to molecule of bacterial origin;cellular response to nitric oxide;cellular response to phosphate st…
Q9ZWT2.1	Homologous	140	234.064	28.74	3.71946	O48845.1(192.0);Q42342.2(174.5);Q9ZNV4.1(135.7);Q9FDW8.1(104.6);O22704.1(60.4);	Cytochrome B5 isoform D	endoplasmic reticulum;endoplasmic reticulum membrane;plastid;integral component of membrane;heme binding;defense response to bacterium;metal ion binding;oxidation-reduction process;	P11035.1(92.1);P11832.3(84.9);Q9ZRP7.1(65.7);Q3EBF7.1(62.8);	Cytochrome b5, heme-binding site;Cytochrome b5-like heme/steroid binding domain;Cytochrome b5-like heme/steroid binding domain superfamily;Eukaryotic molybdopterin oxidoreductase;FAD-binding domain, ferredoxin reductase-type;Fatty acid desaturase;Fatty acid desaturase domain;Ferredoxin-NADP reductase (FNR), nucleotide-binding domain;Flavoprotein pyridine nucleotide cytochrome reductase;Flavoprote…	FAD binding;cellular response to cold;cytosol;endoplasmic reticulum;endoplasmic reticulum membrane;heme binding;integral component of membrane;lipid metabolic process;metal ion binding;molybdenum ion binding;molybdopterin cofactor binding;nitrate assimilation;nitrate reductase (NADH) activity;nitrate reductase (NADPH) activity;nitrate reductase activity;nitric oxide biosynthetic process;nucleus;p…
Q9FHH5.1	Homologous	148	47.5553	45.3182	3.715	Q9SW07.1(128.4);Q3E965.2(92.1);Q3EAV6.1(51.2);	Protein GLUTAMINE DUMPER 3	amino acid transport;response to virus;integral component of membrane;modulation by virus of host process;secretion by cell;regulation of amino acid export;	Q9FHX3.1(20.3);F4IB81.1(15.5);Q9FYQ8.1(10.7);	Concanavalin A-like lectin/glucanase domain superfamily;Legume lectin domain;Legume lectin, beta chain, Mn/Ca-binding site;LysM domain;LysM domain superfamily;Nonaspanin (TM9SF);Protein kinase domain;Protein kinase, ATP binding site;Protein kinase-like domain superfamily;Serine-threonine/tyrosine-protein kinase, catalytic domain;Serine/threonine-protein kinase, active site;	ATP binding;Golgi apparatus;Golgi medial cisterna;Golgi membrane;abscisic acid-activated signaling pathway;carbohydrate binding;defense response;defense response to bacterium;defense response to fungus;defense response to oomycetes;endosome;endosome membrane;innate immune response;integral component of membrane;membrane;negative regulation of defense response;plasma membrane;plastid;positive regu…
P92564.1	Single-copy	145	16.9986	57.1283	3.67735		Uncharacterized mitochondrial protein AtMg01350	integral component of membrane;mitochondrial membrane;	Q9LPG3.1(13.5);	LSM domain superfamily;Mechanosensitive ion channel MscS;Mechanosensitive ion channel MscS domain superfamily;Mechanosensitive ion channel MscS-like, plants/fungi;	anion transport;integral component of membrane;mechanosensitive ion channel activity;plasma membrane;
Q9SZG3.1	Single-copy	123	10.1375	64.2154	3.64227		VQ motif-containing protein 29	nucleus;flower development;cellular response to hypoxia;	F4HWF9.1(11.7);	Nucleotide-binding alpha-beta plait domain superfamily;RNA recognition motif domain;RNA-binding domain superfamily;VQ;	RNA binding;nuclear speck;
Q39129.2	Homologous	120	42.0596	46.0842	3.5253	Q9FKW8.1(105.8);	Thiosulfate sulfurtransferase 16, chloroplastic	thiosulfate sulfurtransferase activity;cytosol;chloroplast;plastid;	Q93WI0.1(27.8);Q9ZNW0.1(21.6);F4I933.1(15.4);	Adenylyltransferase and sulfurtransferase MOCS3/Uba4;Peptidyl-prolyl cis-trans isomerase, PpiC-type;Rhodanase, C-terminal;Rhodanese-like domain;Rhodanese-like domain superfamily;THIF-type NAD/FAD binding fold;UPF0176, acylphosphatase-like domain;Ubiquitin-activating enzyme;	ATP binding;Mo-molybdopterin cofactor biosynthetic process;Mo-molybdopterin cofactor sulfurase activity;URM1 activating enzyme activity;chloroplast;cytoplasm;cytosol;enzyme active site formation via cysteine modification to L-cysteine persulfide;metal ion binding;molybdopterin-synthase adenylyltransferase activity;molybdopterin-synthase sulfurtransferase activity;nucleotidyltransferase activity;p…
Q84VV6.1	Single-copy	146	23.3561	52.1863	3.36641		Bifunctional adenosine 5'-phosphosulfate phosphorylase/adenylylsulfatase HINT4	nucleotide binding;sulfate adenylyltransferase (ADP) activity;peroxisome;cytosol;sulfur compound metabolic process;purine ribonucleotide metabolic process;adenylylsulfatase activity;	Q9M041.1(19.4);	Aprataxin, C2HE/C2H2/C2HC zinc finger;HIT-like domain;HIT-like superfamily;Helix-loop-helix DNA-binding domain superfamily;Histidine triad, conserved site;Macro domain;Myc-type, basic helix-loop-helix (bHLH) domain;P-loop containing nucleoside triphosphate hydrolase;	ATP binding;DNA 5'-adenosine monophosphate hydrolase activity;DNA replication;adenylylsulfatase activity;double-strand break repair;double-stranded RNA binding;metal ion binding;mismatched DNA binding;nucleus;positive regulation of transcription, DNA-templated;protein dimerization activity;purine ribonucleotide metabolic process;regulation of secondary shoot formation;single strand break repair;s…
Q2V4A4.1	Homologous	92	19.6591	53.9054	3.27646	Q2V4A3.1(119.5);	Defensin-like protein 294	extracellular region;killing of cells of other organism;defense response to fungus;	F4HWL4.1(13.9);	Aminoacyl-tRNA synthetase, class Ic;Rossmann-like alpha/beta/alpha sandwich fold;	ATP binding;cytosol;tRNA aminoacylation for protein translation;tyrosine-tRNA ligase activity;
Q940X7.1	Homologous	118	22.1374	52.4695	3.26887	Q9M2B0.1(208.0);Q9M9L0.3(61.7);	RING-box protein 1a	nucleus;cytoplasm;ubiquitin-dependent protein catabolic process;zinc ion binding;NEDD8 transferase activity;SCF-dependent proteasomal ubiquitin-dependent protein catabolic process;cullin-RING ubiquitin ligase complex;Cul2-RING ubiquitin ligase complex;Cul3-RING ubiquitin ligase complex;Cul7-RING ubiquitin ligase complex;nuclear SCF ubiquitin ligase complex;protein neddylation;ubiquitin protein li…	Q7X843.2(33.3);Q8LE94.1(31.9);	Hypoxia induced protein, domain;Zinc finger, RING-H2-type;Zinc finger, RING-type;Zinc finger, RING/FYVE/PHD-type;	cytoplasm;integral component of membrane;metal ion binding;protein ubiquitination;transferase activity;ubiquitin protein ligase binding;ubiquitin-protein transferase activity;zinc ion binding;
Q9M1A6.1	Single-copy	120	465.907	20.3017	3.21308		Jacalin-related lectin 39	carbohydrate binding;	O04310.1(73.7);Q9SAV1.1(70.6);O80736.1(62.8);O04309.1(62.6);O80948.1(62.3);O80950.1(58.9);Q5XF82.1(57.8);O80735.1(56.0);Q9LTY2.1(54.6);O80737.1(54.0);	Jacalin-like lectin domain;Jacalin-like lectin domain superfamily;Jacalin-like lectin domain, plant;	carbohydrate binding;cell adhesion;chloroplast;copper ion binding;cytosol;defense response;flower development;nucleus;plasmodesma;response to cold;response to jasmonic acid;response to wounding;thioglucosidase binding;thioglucosidase complex;vacuole;vegetative to reproductive phase transition of meristem;
F4IQQ9.1	Single-copy	129	116.819	34.0915	3.13482		Transcription factor bHLH138	DNA binding;DNA-binding transcription factor activity;nucleus;protein dimerization activity;	Q9ZVX2.2(41.4);Q9FIP9.1(32.8);Q9LNJ5.1(31.2);Q9ZPY8.2(31.0);	Helix-loop-helix DNA-binding domain superfamily;Myc-type, basic helix-loop-helix (bHLH) domain;Transcription factor MYC/MYB N-terminal;	DNA binding;DNA-binding transcription factor activity;RNA polymerase II cis-regulatory region sequence-specific DNA binding;abscisic acid-activated signaling pathway;anther wall tapetum cell differentiation;anther wall tapetum development;anthocyanin-containing compound biosynthetic process;bHLH transcription factor binding;chromatin binding;cytoplasm;defense response;extracellular ATP signaling;…
O48845.1	Homologous	134	244.126	26.45	3.09542	Q9ZWT2.1(191.7);Q42342.2(186.4);Q9ZNV4.1(123.0);Q9FDW8.1(122.4);O22704.1(66.2);	Cytochrome b5 isoform B	endoplasmic reticulum;endoplasmic reticulum membrane;integral component of membrane;heme binding;very long-chain fatty acid biosynthetic process;alkane biosynthetic process;metal ion binding;oxidation-reduction process;	P11035.1(92.1);P11832.3(84.9);Q9ZRP7.1(65.7);Q3EBF7.1(62.8);	Cytochrome b5, heme-binding site;Cytochrome b5-like heme/steroid binding domain;Cytochrome b5-like heme/steroid binding domain superfamily;Eukaryotic molybdopterin oxidoreductase;FAD-binding domain, ferredoxin reductase-type;Fatty acid desaturase;Fatty acid desaturase domain;Ferredoxin-NADP reductase (FNR), nucleotide-binding domain;Flavoprotein pyridine nucleotide cytochrome reductase;Flavoprote…	FAD binding;cellular response to cold;cytosol;endoplasmic reticulum;endoplasmic reticulum membrane;heme binding;integral component of membrane;lipid metabolic process;metal ion binding;molybdenum ion binding;molybdopterin cofactor binding;nitrate assimilation;nitrate reductase (NADH) activity;nitrate reductase (NADPH) activity;nitrate reductase activity;nitric oxide biosynthetic process;nucleus;p…
Q2V337.1	Homologous	84	7.81315	65.7858	3.0954	Q2V485.1(37.5);Q2V4G1.1(32.9);P82764.1(32.1);P82763.1(32.0);Q8GY39.1(31.0);	Putative defensin-like protein 101	extracellular region;killing of cells of other organism;defense response to fungus;	Q5MK24.1(10.6);	Arv1 protein;	Golgi apparatus;cortical endoplasmic reticulum;endoplasmic reticulum;endoplasmic reticulum membrane;integral component of membrane;intracellular sterol transport;regulation of plasma membrane sterol distribution;sphingolipid metabolic process;sterol metabolic process;
Q058G9.1	Homologous	105	20.4352	52.5838	3.04703	B3H5A9.1(41.9);Q9SKW7.2(39.0);	Precursor of CEP5	hormone activity;extracellular region;response to osmotic stress;cellular response to nitrogen starvation;gravitropism;response to auxin;response to gibberellin;response to brassinosteroid;response to salicylic acid;lateral root formation;apoplast;root development;response to ammonium ion;primary root development;response to nitrate starvation;regulation of leaf morphogenesis;response to nitrogen…	O82318.1(13.9);	Leucine-rich repeat;Leucine-rich repeat domain superfamily;Leucine-rich repeat, typical subtype;Leucine-rich repeat-containing N-terminal, plant-type;Protein kinase domain;Protein kinase-like domain superfamily;	ATP binding;endoplasmic reticulum;integral component of membrane;plasma membrane;protein kinase activity;
Q8LBX7.1	Single-copy	116	85.0839	36.9431	3.00997		Protein TRACHEARY ELEMENT DIFFERENTIATION-RELATED 6	extracellular region;plasma membrane;multicellular organism development;plant-type cell wall;plant-type secondary cell wall biogenesis;integral component of membrane;secondary cell wall cellulose synthase complex;cell wall organization;tracheary element differentiation;regulation of secondary cell wall biogenesis;	O23081.2(16.3);Q9C823.1(15.4);Q9LV48.1(12.6);O80623.1(12.4);Q9LK43.1(11.9);	C-type lectin fold;C-type lectin-like;C-type lectin-like/link domain superfamily;Gnk2-homologous domain;Gnk2-homologous domain superfamily;Leucine-rich repeat;Leucine-rich repeat domain superfamily;Leucine-rich repeat, typical subtype;Leucine-rich repeat-containing N-terminal, plant-type;Malectin-like domain;Protein kinase domain;Protein kinase, ATP binding site;Protein kinase-like domain superfa…	ATP binding;Golgi apparatus;carbohydrate binding;integral component of membrane;plasma membrane;plasmodesma;protein autophosphorylation;protein kinase activity;protein phosphorylation;protein serine/threonine kinase activity;response to fungus;response to wounding;secretory vesicle;transmembrane receptor protein serine/threonine kinase activity;transmembrane receptor protein tyrosine kinase activ…
Q42344.1	Homologous	138	82.9	37.0848	2.97306	O49597.1(149.5);O49596.1(129.2);P93047.1(124.0);	High mobility group B protein 4	chromatin;DNA binding;chromatin binding;DNA-binding transcription factor activity;nucleus;cytoplasm;cytosol;chromatin assembly or disassembly;structural constituent of chromatin;	Q05153.2(51.4);Q9MAT6.1(24.2);Q9LTT3.1(23.6);Q9LG02.2(21.6);Q9SGS2.1(20.2);	ARID DNA-binding domain;ARID DNA-binding domain superfamily;Domain of unknown function DUF1747;FACT complex subunit POB3-like, N-terminal PH domain;High mobility group box domain;High mobility group box domain superfamily;PH-like domain superfamily;SSRP1 domain;SSRP1 domain superfamily;Structure-specific recognition protein;	DNA binding;DNA repair;DNA replication;DNA-binding transcription factor activity;FACT complex;four-way junction DNA binding;glucosinolate metabolic process;histone binding;karyogamy;nuclear chromatin;nuclear euchromatin;nucleosome binding;nucleus;polar nucleus fusion;pollen germination;pollen tube;pollen tube growth;regulation of transcription, DNA-templated;transcription factor binding;transcrip…
Q9SIZ9.1	Homologous	104	2.94416	111.058	2.89644	Q9LV87.1(32.8);	Elicitor peptide 6	innate immune response;	Q9ZR37.1(12.9);	Atypical dual specificity phosphatase;Dual specificity phosphatase, catalytic domain;Dual specificity protein phosphatase domain;Protein-tyrosine phosphatase-like;Tyrosine specific protein phosphatases domain;	calmodulin binding;cytoplasm;nucleus;protein dephosphorylation;protein tyrosine phosphatase activity;protein tyrosine/serine/threonine phosphatase activity;
Q3E8A8.2	Homologous	95	148.078	30.6947	2.85128	B3H5R8.1(137.4);P55852.2(78.7);Q9FLP6.1(72.0);Q9FKC5.1(63.0);Q9FLP5.1(59.0);Q9FKC6.1(50.1);Q8VZI7.1(36.1);	Putative small ubiquitin-related modifier 7	nucleus;cytoplasm;protein sumoylation;protein tag;ubiquitin-like protein ligase binding;	Q8H159.2(36.1);P0CH32.1(32.3);Q3E7T8.2(29.0);Q1EC66.1(28.6);P0CH33.1(24.3);Q9SHE7.3(21.2);Q3E7K8.1(19.5);Q8RUC6.3(18.0);Q39256.1(17.6);Q9FHQ6.1(16.5);	Nedd8-like ubiquitin;Ubiquitin conserved site;Ubiquitin domain;Ubiquitin-like domain;Ubiquitin-like domain superfamily;	cell wall;cellular protein modification process;cytoplasm;cytosol;endoplasmic reticulum;ethylene biosynthetic process;modification-dependent protein catabolic process;nucleolus;nucleus;plasma membrane;plastid;protein neddylation;protein tag;protein ubiquitination;response to UV-B;response to auxin;response to salicylic acid;ubiquitin protein ligase binding;ubiquitin-dependent protein catabolic pr…
Q8GY11.1	Homologous	109	170.439	28.8385	2.73479	Q9FYA2.1(121.7);Q9S763.1(104.0);	Probable WRKY transcription factor 43	DNA-binding transcription factor activity;nucleus;sequence-specific DNA binding;	Q9SZ67.1(113.2);	Leucine-rich repeat 3;Leucine-rich repeat domain superfamily;NB-ARC;P-loop containing nucleoside triphosphate hydrolase;Paired amphipathic helix;Paired amphipathic helix superfamily;Protein kinase domain;Protein kinase-like domain superfamily;Toll/interleukin-1 receptor homology (TIR) domain superfamily;WRKY domain;WRKY domain superfamily;Winged helix DNA-binding domain superfamily;	ADP binding;ATP binding;DNA-binding transcription factor activity;chloroplast envelope;defense response;nucleus;protein serine/threonine kinase activity;sequence-specific DNA binding;transcription regulatory region DNA binding;
Q9M9R9.1	Homologous	73	49.6986	41.5055	2.71899	O64725.1(128.0);	NADH dehydrogenase [ubiquinone] 1 beta subcomplex subunit 3-B	extracellular region;mitochondrial respiratory chain complex I;photorespiration;integral component of membrane;electron transport chain;mitochondrial membrane;mitochondrial respiratory chain complex I assembly;respiratory chain complex I;	Q94A03.1(12.1);Q8VZV7.1(12.1);Q940J9.1(12.0);	Phosphatidate cytidylyltransferase;Putative S-adenosyl-L-methionine-dependent methyltransferase;S-adenosyl-L-methionine-dependent methyltransferase;	CDP-diacylglycerol biosynthetic process;Golgi apparatus;Golgi cis cisterna;Golgi membrane;Golgi trans cisterna;chloroplast membrane;chloroplast thylakoid membrane;cytoplasm;endosome;integral component of membrane;methylation;methyltransferase activity;phosphatidate cytidylyltransferase activity;phosphatidylglycerol biosynthetic process;plant-type cell wall;plastid;trans-Golgi network;vacuolar mem…
Q2V4L5.1	Homologous	98	11.2155	58.598	2.71732	Q9FL73.1(153.1);Q2V2Y6.1(56.4);Q3EBU2.1(54.3);P82792.1(34.8);	Defensin-like protein 68	extracellular region;killing of cells of other organism;defense response to fungus;	Q9SRY6.2(25.3);	Glutathione S-transferase, C-terminal;Glutathione S-transferase, C-terminal domain superfamily;Glutathione S-transferase, C-terminal-like;Glutathione S-transferase, N-terminal;Glutathione S-transferases Phi, C-terminal;Glutathione Transferase family;Thioredoxin-like superfamily;	cytoplasm;cytosol;glutathione binding;glutathione metabolic process;glutathione transferase activity;mitochondrion;toxin catabolic process;
Q9FZK4.1	Homologous	122	52.3452	40.9	2.70423	Q9C7F5.1(213.6);	Nuclear transport factor 2A	nucleus;nuclear envelope;cytoplasm;cytosol;protein import into nucleus;nucleocytoplasmic transport;nuclear pore central transport channel;	Q9FME2.1(50.5);O80396.1(21.8);	NTF2-like domain superfamily;Nuclear transport factor 2;Nuclear transport factor 2, eukaryote;Nucleotide-binding alpha-beta plait domain superfamily;Protein kinase domain;Protein kinase, ATP binding site;Protein kinase-like domain superfamily;RNA recognition motif domain;RNA-binding domain superfamily;Ras GTPase-activating protein-binding protein;Serine/threonine-protein kinase, active site;	ATP binding;MAP kinase activity;MAP kinase kinase activity;abscisic acid-activated signaling pathway;activation of MAPK activity;activation of protein kinase activity;cytoplasm;cytosol;defense response, incompatible interaction;gene silencing by RNA;induced systemic resistance, ethylene mediated signaling pathway;induced systemic resistance, jasmonic acid mediated signaling pathway;mRNA binding;n…
P25863.2	Single-copy	128	20.4957	51.1148	2.69341		Dehydrin Xero 1	cytosol;response to water deprivation;cold acclimation;response to abscisic acid;	P30185.1(93.3);Q96261.1(66.6);P31168.2(64.6);P42759.1(59.3);P42763.1(52.1);	Dehydrin;Dehydrin, conserved site;	actin binding;calcium ion binding;chloroplast;cold acclimation;copper ion binding;cytoplasm;cytosol;defense response to fungus;extrinsic component of membrane;heat acclimation;membrane;mitochondrion;nickel cation binding;nucleus;phosphatidylcholine binding;phosphatidylserine binding;plasma membrane;plasmodesma;protein stabilization;regulation of membrane permeability;regulation of seed germinatio…
Q9LPJ2.2	Homologous	134	8.00474	63.1306	2.6793	Q9SUD3.2(59.9);Q945L0.1(58.6);	Putative cytochrome c oxidase subunit 6b-like	mitochondrion;	Q67XC9.1(12.6);	HAD superfamily;HAD-like superfamily;HAD-superfamily hydrolase, subfamily IIB;Trehalose-phosphatase;	chloroplast;response to osmotic stress;response to oxidative stress;response to salt stress;trehalase activity;trehalose biosynthetic process;trehalose-phosphatase activity;
Q9M2J9.1	Homologous	122	28.4063	47.3451	2.6708	Q94CG2.4(137.8);	Bet1-like SNARE 1-1	nucleus;endoplasmic reticulum membrane;cytosol;plasma membrane;protein transport;vesicle-mediated transport;integral component of Golgi membrane;	Q946Y7.1(31.7);Q9SRV7.1(26.0);P93654.1(14.3);Q8VZU2.1(14.0);	SNARE;Syntaxin 6, N-terminal;Syntaxin, N-terminal domain;Syntaxin/epimorphin, conserved site;Target SNARE coiled-coil homology domain;	Golgi vesicle transport;SNAP receptor activity;SNARE binding;SNARE complex;abscisic acid-activated signaling pathway;amyloplast organization;endomembrane system;exocytosis;integral component of membrane;intracellular protein transport;late endosome membrane;late endosome to vacuole transport;negative gravitropism;plant-type vacuole;plant-type vacuole membrane;plasma membrane;stomatal movement;tra…
Q9LH88.1	Homologous	120	49.3102	41.2301	2.62837	Q9ZU26.1(71.1);Q9M0U1.1(32.3);Q1G3Z6.1(31.0);Q8GWU1.2(30.8);	Putative B3 domain-containing protein At3g28853	DNA binding;nucleus;	Q9SJ07.1(95.7);Q9C6P5.1(33.5);Q9C688.1(31.2);	AP2/ERF domain;AP2/ERF domain superfamily;AP2/ERF transcription factor ERF/PTI6;B3 DNA binding domain;DNA-binding domain superfamily;DNA-binding pseudobarrel domain superfamily;F-box associated domain, type 3;	DNA binding;DNA-binding transcription factor activity;ethylene-activated signaling pathway;nucleus;
P0CW98.1	Homologous	148	40.0226	43.3081	2.59411	Q9LS43.1(108.4);	Protein PLANT CADMIUM RESISTANCE 9	integral component of membrane;	Q8S8T8.1(79.4);Q8L7E9.1(49.4);Q3EBY6.1(46.8);	Adaptor protein Cbl, N-terminal domain superfamily;PLAC8 motif-containing protein;	calcium channel activity;calcium ion transport;carbohydrate homeostasis;cell surface receptor signaling pathway;cellular response to mechanical stimulus;integral component of membrane;integral component of plasma membrane;osmosensory signaling pathway;plasma membrane;post-embryonic root development;
Q9LVC9.1	Homologous	120	10.1952	59.0633	2.55826	Q9SVZ6.1(187.6);Q8LEQ0.2(41.2);O23095.2(39.9);Q8LCW9.2(39.7);Q9SLF7.1(34.2);P51407.2(34.2);Q9LUK2.1(31.9);	60S acidic ribosomal protein P3-2	structural constituent of ribosome;nucleus;cytosol;translational elongation;plastid;cytosolic ribosome;	O65517.1(13.5);Q9SRX2.1(13.3);	60S ribosomal protein L19;Ribosomal protein L19, eukaryotic;Ribosomal protein L19/L19e;Ribosomal protein L19/L19e conserved site;Ribosomal protein L19/L19e superfamily;Ribosomal protein L19/L19e, domain 1;SHI protein family;SHORT INTERNODES, C-terminal;Zinc finger, lateral root primordium type 1;	DNA binding;RNA binding;anther development;auxin biosynthetic process;auxin-activated signaling pathway;cytosol;cytosolic large ribosomal subunit;cytosolic ribosome;extracellular region;mRNA binding;metal ion binding;nucleolus;nucleus;plasma membrane;plasmodesma;pollen development;polysomal ribosome;positive regulation of transcription, DNA-templated;structural constituent of ribosome;translation;
P0C1T5.1	Single-copy	85	13.2596	55.6835	2.55701		Elicitor peptide 7	innate immune response;	P46602.2(15.2);	HD-ZIP protein, N-terminal;Homeobox domain;Homeobox, conserved site;Homeobox-like domain superfamily;Leucine zipper, homeobox-associated;	DNA-binding transcription factor activity;nucleus;sequence-specific DNA binding;
P82750.1	Homologous	78	15.8999	52.5936	2.37277	P82751.2(96.8);P82737.1(89.6);Q9M0F3.1(83.6);P82735.1(75.7);P82739.1(64.4);Q9M0F1.2(61.4);Q9M0F2.2(53.8);P82727.1(37.9);	Putative defensin-like protein 154	extracellular region;killing of cells of other organism;defense response to fungus;	Q8GXA1.3(11.4);	Invertase/pectin methylesterase inhibitor domain superfamily;Pectin lyase fold;Pectin lyase fold/virulence factor;Pectinesterase inhibitor domain;Pectinesterase, Asp active site;Pectinesterase, Tyr active site;Pectinesterase, catalytic;	aspartyl esterase activity;cell wall;cell wall modification;extracellular region;pectin catabolic process;pectinesterase activity;pectinesterase inhibitor activity;pollen tube;
Q2V4C3.1	Homologous	78	17.5031	51.3269	2.34285	Q2V4C4.1(46.3);Q2V2Y6.1(34.8);Q9FL73.1(34.0);	Defensin-like protein 281	extracellular region;killing of cells of other organism;defense response to fungus;	Q9SRY6.2(27.4);	Glutathione S-transferase, C-terminal;Glutathione S-transferase, C-terminal domain superfamily;Glutathione S-transferase, C-terminal-like;Glutathione S-transferase, N-terminal;Glutathione S-transferases Phi, C-terminal;Glutathione Transferase family;Thioredoxin-like superfamily;	cytoplasm;cytosol;glutathione binding;glutathione metabolic process;glutathione transferase activity;mitochondrion;toxin catabolic process;
Q9LV87.1	Homologous	92	3.69214	74.5674	2.26048	Q9LV88.1(82.7);Q9SIZ9.1(32.5);	Elicitor peptide 1	response to wounding;response to ethylene;response to jasmonic acid;innate immune response;	Q9LTK0.1(10.5);	Protein phosphatase inhibitor 2 (IPP-2);	cytoplasm;nucleus;protein phosphatase inhibitor activity;regulation of phosphoprotein phosphatase activity;regulation of signal transduction;
Q9FLB3.1	Homologous	143	93.4721	32.9853	2.25197	Q8LGG0.2(44.5);	Peptidyl-prolyl cis-trans isomerase FKBP15-3	peptidyl-prolyl cis-trans isomerase activity;	F4J9Q6.1(88.9);Q7DMA9.2(68.2);	FKBP-type peptidyl-prolyl cis-trans isomerase domain;Nucleoplasmin-like domain;Peptidyl-prolyl cis-trans isomerase Fpr3/Fpr4-like;Peptidyl-prolyl cis-trans isomerase PASTICCINO1;Tetratricopeptide repeat;Tetratricopeptide repeat-containing domain;Tetratricopeptide-like helical domain superfamily;	auxin-activated signaling pathway;cell differentiation;chaperone-mediated protein folding;cytokinin-activated signaling pathway;cytoplasm;cytosol;embryo development ending in seed dormancy;embryonic pattern specification;endoplasmic reticulum;endoplasmic reticulum membrane;establishment of cell polarity;integral component of membrane;lateral root development;nucleus;peptidyl-prolyl cis-trans isom…
C4B8C4.1	Homologous	107	2.34265	98.3299	2.21248	Q9LFT5.1(51.8);Q9LUH9.1(39.4);Q2V3I3.1(33.5);Q9T068.1(30.6);	EPIDERMAL PATTERNING FACTOR-like protein 3	extracellular region;guard cell differentiation;stomatal complex development;	Q1PEY6.1(81.7);C4B8C5.1(15.0);	EPIDERMAL PATTERNING FACTOR-like protein;	extracellular region;guard cell differentiation;stomatal complex development;
Q9XIR8.1	Homologous	74	25.7148	46.3203	2.20241	Q9FL96.1(115.3);	Protein DELETION OF SUV3 SUPPRESSOR 1(I)	proteasome complex;double-strand break repair via homologous recombination;mRNA export from nucleus;proteasome regulatory particle, lid subcomplex;proteasome assembly;	F4JMJ1.1(16.6);	Heat shock protein 70 family;Heat shock protein 70, conserved site;Heat shock protein 70kD, C-terminal domain superfamily;Heat shock protein 70kD, peptide-binding domain superfamily;	ATP binding;Golgi apparatus;cellular response to hypoxia;cytosol;endoplasmic reticulum;endoplasmic reticulum chaperone complex;endoplasmic reticulum lumen;negative regulation of hypoxia-induced intrinsic apoptotic signaling pathway;secretory vesicle;vacuolar membrane;
Q9FNV8.1	Homologous	139	42.0533	40.7719	2.1463	Q9M157.1(43.8);O22059.1(42.1);B3H4X8.1(42.0);Q9LNI5.1(41.5);Q84RD1.1(39.4);Q8GV05.1(38.2);D3GKW6.1(32.2);	Transcription factor MYB114	DNA-binding transcription factor activity;nucleus;multicellular organism development;response to jasmonic acid;cell differentiation;regulation of anthocyanin biosynthetic process;sequence-specific DNA binding;transcription regulatory region DNA binding;	Q9FE25.1(117.2);Q9ZTC3.1(113.8);Q9FNV9.1(112.7);Q9SEI0.1(98.7);Q96276.1(95.1);Q9LTF7.1(94.9);P27900.2(94.1);Q38850.1(94.0);Q9S9K9.1(86.2);Q9FJA2.1(86.1);	Homeobox-like domain superfamily;Myb domain;Myb-like transcription factor;SANT/Myb domain;	ATP binding;DNA binding;DNA-binding transcription factor activity;anthocyanin-containing compound biosynthetic process;cell differentiation;cell fate commitment;cell fate specification;cinnamic acid biosynthetic process;fatty acid biosynthetic process;flavonoid biosynthetic process;gibberellic acid mediated signaling pathway;jasmonic acid mediated signaling pathway;mucilage biosynthetic process i…
Q9FJX2.1	Homologous	146	41.3323	40.7253	2.10019	P51414.2(247.0);	60S ribosomal protein L26-2	cytoplasmic translation;RNA binding;structural constituent of ribosome;plastid;cytosolic large ribosomal subunit;cytosolic ribosome;ribosomal large subunit biogenesis;polysomal ribosome;	Q9STN3.2(18.2);O80770.2(13.4);	KOW;NGN domain;NGN domain, eukaryotic;NusG, N-terminal;NusG, N-terminal domain superfamily;Ribosomal protein L2, domain 2;Ribosomal protein L24/L26, conserved site;Spt5 transcription elongation factor, N-terminal;Spt5, KOW domain repeat 1;Spt5, KOW domain repeat 2;Spt5, KOW domain repeat 3;Spt5, KOW domain repeat 4;Spt5, KOW domain repeat 5;Spt5, KOW domain repeat 6;Transcription elongation facto…	DSIF complex;mRNA binding;regulation of DNA-templated transcription, elongation;regulation of transcription by RNA polymerase II;ribosome;structural constituent of ribosome;transcription elongation from RNA polymerase II promoter;translation;
Q9M2F1.2	Homologous	86	16.867	50.3244	2.06876	O64650.1(170.4);Q8L953.2(167.9);	40S ribosomal protein S27-2	ribosomal small subunit assembly;RNA binding;structural constituent of ribosome;cell wall;ribosome;translation;plasmodesma;cytosolic ribosome;cytosolic small ribosomal subunit;polysomal ribosome;metal ion binding;	P0C5B6.1(13.0);	AMP-binding enzyme, C-terminal domain;AMP-binding, conserved site;AMP-dependent synthetase-like superfamily;AMP-dependent synthetase/ligase;	ATP binding;ligase activity;peroxisome;
Q8L953.2	Homologous	84	17.044	50.144	2.05761	Q9M2F1.2(167.8);O64650.1(163.7);	40S ribosomal protein S27-3	ribosomal small subunit assembly;RNA binding;structural constituent of ribosome;plasma membrane;translation;plastid;cytosolic ribosome;cytosolic small ribosomal subunit;metal ion binding;	P0C5B6.1(13.0);	AMP-binding enzyme, C-terminal domain;AMP-binding, conserved site;AMP-dependent synthetase-like superfamily;AMP-dependent synthetase/ligase;	ATP binding;ligase activity;peroxisome;
Q9FLM8.1	Homologous	51	20.5039	47.7	1.9907	Q9C8M4.1(62.1);	DNA-directed RNA polymerases II, IV and V subunit 12	RNA polymerase IV complex;RNA polymerase V complex;DNA binding;DNA-directed 5'-3' RNA polymerase activity;RNA polymerase II, core complex;RNA polymerase III complex;RNA polymerase I complex;transcription by RNA polymerase I;transcription by RNA polymerase II;transcription by RNA polymerase III;zinc ion binding;	F4I8S3.1(11.3);	Helicase superfamily 1/2, ATP-binding domain;Helicase, C-terminal;P-loop containing nucleoside triphosphate hydrolase;SNF2-like, N-terminal domain superfamily;SNF2-related, N-terminal domain;	ATP binding;DNA binding;helicase activity;nucleus;positive regulation of RNA interference;
Q9MAB9.1	Homologous	117	140.84	27.2274	1.92817	Q8LCS8.1(175.6);Q8GWJ6.1(118.0);Q9SH14.1(109.7);Q9SW27.1(100.4);Q9LSD8.1(97.4);	Membrane-anchored ubiquitin-fold protein 1	plasma membrane;	Q8H159.2(55.2);P0CH32.1(47.6);Q3E7T8.2(39.8);Q1EC66.1(39.7);P0CH33.1(31.4);Q9FHQ6.1(27.8);Q3E7K8.1(26.8);Q39256.1(24.8);	Ubiquitin conserved site;Ubiquitin domain;Ubiquitin-like domain;Ubiquitin-like domain superfamily;	cell wall;cellular protein modification process;cytoplasm;cytosol;modification-dependent protein catabolic process;nucleolus;nucleus;plasma membrane;plastid;protein tag;protein ubiquitination;response to UV-B;response to salicylic acid;ubiquitin protein ligase binding;ubiquitin-dependent protein catabolic process;vacuolar membrane;vacuole;
Q9LXI8.1	Known MIP	67	116.456	29.1194	1.92096	Q56WL5.1(79.1);F4IG60.1(32.5);Q9LZX5.1(30.0);	Protein LITTLE ZIPPER 3	nucleus;adaxial/abaxial axis specification;regulation of meristem growth;leaf vascular tissue pattern formation;leaf shaping;	Q9ZU11.1(15.8);O04291.1(15.6);Q9SE43.2(14.6);O04292.1(14.5);Q39123.1(12.7);	Homeobox domain;Homeobox-like domain superfamily;MEKHLA;START domain;START-like domain superfamily;	DNA binding;DNA-binding transcription factor activity;adaxial/abaxial axis specification;adaxial/abaxial pattern specification;cell differentiation;determination of bilateral symmetry;embryonic pattern specification;integument development;lipid binding;meristem initiation;nucleus;polarity specification of adaxial/abaxial axis;positive regulation of cell differentiation;positive regulation of cell…
P93293.1	Single-copy	145	106.792	29.9414	1.90976		Uncharacterized mitochondrial protein AtMg00300	mitochondrion;	Q9ZT94.1(43.8);Q94HW2.1(34.5);	GAG-pre-integrase domain;Integrase, catalytic core;Reverse transcriptase, RNA-dependent DNA polymerase;Ribonuclease H superfamily;Ribonuclease H-like superfamily;	DNA integration;DNA recombination;RNA-directed DNA polymerase activity;aspartic-type endopeptidase activity;endonuclease activity;metal ion binding;nucleic acid binding;
Q56WL5.1	Known MIP	72	84.3931	32.3097	1.90341	Q9LXI8.1(83.9);F4IG60.1(31.0);	Protein LITTLE ZIPPER 4		Q9SE43.2(14.4);O04291.1(13.7);O04292.1(13.0);Q9ZU11.1(12.4);	Homeobox domain;Homeobox-like domain superfamily;MEKHLA;START domain;START-like domain superfamily;	DNA binding;DNA-binding transcription factor activity;adaxial/abaxial axis specification;adaxial/abaxial pattern specification;cell differentiation;determination of bilateral symmetry;embryonic pattern specification;integument development;lipid binding;meristem initiation;nucleus;polarity specification of adaxial/abaxial axis;primary shoot apical meristem specification;radial pattern formation;tr…
Q9LZ17.3	Homologous	141	10.6972	54.3355	1.84765	P49205.3(268.5);Q9SJ36.3(265.5);Q9SQZ1.3(235.4);	40S ribosomal protein S17-4	mRNA binding;structural constituent of ribosome;ribosome;plasma membrane;translation;	Q9LSH2.1(12.2);	Glutamate decarboxylase;Pyridoxal phosphate-dependent decarboxylase;Pyridoxal phosphate-dependent transferase;Pyridoxal phosphate-dependent transferase, major domain;	calmodulin binding;cytosol;glutamate catabolic process;glutamate decarboxylase activity;plasmodesma;pyridoxal phosphate binding;
Q9LU15.2	Single-copy	127	18.9669	47.6528	1.83363		Histidine-containing phosphotransfer protein 4	phosphorelay signal transduction system;nucleus;cytoplasm;cytosol;cytokinin-activated signaling pathway;histidine phosphotransfer kinase activity;phosphorylation;protein histidine kinase binding;	P0DI78.1(13.1);P0DI79.1(13.1);	Protein of unknown function DUF677;	integral component of membrane;
Q9SJ36.3	Homologous	140	10.7108	53.7707	1.76515	Q9LZ17.3(265.7);P49205.3(261.7);Q9SQZ1.3(237.0);	40S ribosomal protein S17-2	structural constituent of ribosome;mitochondrion;translation;cytosolic small ribosomal subunit;	Q9LSH2.1(12.1);	Glutamate decarboxylase;Pyridoxal phosphate-dependent decarboxylase;Pyridoxal phosphate-dependent transferase;Pyridoxal phosphate-dependent transferase, major domain;	calmodulin binding;cytosol;glutamate catabolic process;glutamate decarboxylase activity;plasmodesma;pyridoxal phosphate binding;
P51414.2	Homologous	146	41.3323	38.8349	1.75379	Q9FJX2.1(247.3);	60S ribosomal protein L26-1	cytoplasmic translation;RNA binding;mRNA binding;structural constituent of ribosome;nucleus;nucleolus;vacuolar membrane;cytosol;plasma membrane;response to cold;cytosolic large ribosomal subunit;cytosolic ribosome;ribosomal large subunit biogenesis;polysomal ribosome;	Q9STN3.2(18.2);O80770.2(13.4);	KOW;NGN domain;NGN domain, eukaryotic;NusG, N-terminal;NusG, N-terminal domain superfamily;Ribosomal protein L2, domain 2;Ribosomal protein L24/L26, conserved site;Spt5 transcription elongation factor, N-terminal;Spt5, KOW domain repeat 1;Spt5, KOW domain repeat 2;Spt5, KOW domain repeat 3;Spt5, KOW domain repeat 4;Spt5, KOW domain repeat 5;Spt5, KOW domain repeat 6;Transcription elongation facto…	DSIF complex;mRNA binding;regulation of DNA-templated transcription, elongation;regulation of transcription by RNA polymerase II;ribosome;structural constituent of ribosome;transcription elongation from RNA polymerase II promoter;translation;
Q9SVZ6.1	Homologous	119	9.36427	55.2471	1.74306	Q9LVC9.1(186.7);Q8LEQ0.2(39.3);Q8LCW9.2(38.2);O23095.2(37.5);	60S acidic ribosomal protein P3-1	structural constituent of ribosome;nucleus;cytosol;plasma membrane;translational elongation;cytosolic ribosome;polysomal ribosome;	Q9SRX2.1(12.0);O65517.1(11.1);	60S ribosomal protein L19;Ribosomal protein L19, eukaryotic;Ribosomal protein L19/L19e;Ribosomal protein L19/L19e conserved site;Ribosomal protein L19/L19e superfamily;Ribosomal protein L19/L19e, domain 1;SHI protein family;SHORT INTERNODES, C-terminal;Zinc finger, lateral root primordium type 1;	DNA binding;RNA binding;anther development;auxin biosynthetic process;auxin-activated signaling pathway;cytosol;cytosolic large ribosomal subunit;cytosolic ribosome;extracellular region;mRNA binding;metal ion binding;nucleolus;nucleus;plasma membrane;plasmodesma;pollen development;polysomal ribosome;positive regulation of transcription, DNA-templated;structural constituent of ribosome;translation;
Q1G3M2.1	Single-copy	81	68.0786	33.521	1.72815		LYR motif-containing protein At3g19508	cytosol;	Q9SA86.1(14.1);Q9FZC8.1(12.9);Q9SVG7.1(12.7);F4HV09.1(12.3);	Berberine/berberine-like;FAD linked oxidase, N-terminal;FAD-binding domain, PCMH-type;FAD-binding, type PCMH, subdomain 1;FAD-binding, type PCMH-like superfamily;	FAD binding;cell wall;extracellular region;oxidoreductase activity;plant-type cell wall;
Q2V4I8.1	Homologous	81	18.8552	46.8753	1.69877	Q2V3S0.1(57.7);Q2V3D7.1(54.8);Q2V3R9.1(53.7);	Defensin-like protein 32	extracellular region;killing of cells of other organism;defense response to fungus;	Q940G0.1(13.9);	Nonaspanin (TM9SF);	Golgi apparatus;Golgi cis cisterna;Golgi medial cisterna;Golgi membrane;cis-Golgi network;endosome;endosome membrane;extracellular region;integral component of membrane;membrane;protein localization to membrane;trans-Golgi network;
P92557.1	Single-copy	148	38.5968	39.1946	1.69506		Ribosomal protein S7, mitochondrial	ribosomal small subunit assembly;mRNA binding;structural constituent of ribosome;mitochondrial small ribosomal subunit;ribosome;translation;rRNA binding;	Q9CA83.1(14.3);O82191.1(12.6);Q9LYG3.1(12.0);	Malic enzyme, N-terminal domain;Malic enzyme, N-terminal domain superfamily;Malic enzyme, NAD-binding;Malic enzyme, conserved site;Malic oxidoreductase;NAD(P)-binding domain superfamily;	NAD binding;apoplast;cell wall;chloroplast;cobalt ion binding;cytosol;fatty acid biosynthetic process;malate dehydrogenase (decarboxylating) (NAD+) activity;malate dehydrogenase (decarboxylating) (NADP+) activity;malate metabolic process;malic enzyme activity;metal ion binding;mitochondrion;oxaloacetate decarboxylase activity;pentose-phosphate shunt, oxidative branch;plasma membrane;plasmodesma;p…
Q2V468.1	Homologous	86	18.3447	47.1302	1.69152	Q2V467.1(89.3);Q2V466.1(64.4);	Putative defensin-like protein 189	extracellular region;killing of cells of other organism;defense response to fungus;	Q8L7D2.1(12.6);	Cucumisin-like catalytic domain;Peptidase S8 propeptide/proteinase inhibitor I9;Peptidase S8 propeptide/proteinase inhibitor I9 superfamily;Peptidase S8, subtilisin, Ser-active site;Peptidase S8, subtilisin-related;Peptidase S8/S53 domain;Peptidase S8/S53 domain superfamily;Subtilisin-like protease, fibronectin type-III domain;	cytoplasm;extracellular region;nucleus;response to jasmonic acid;serine-type endopeptidase activity;
O48890.1	Single-copy	138	10.7947	53.1065	1.68248		DNA-directed RNA polymerase II subunit 4	nucleotide binding;nuclear-transcribed mRNA catabolic process, deadenylation-dependent decay;P-body;DNA-directed 5'-3' RNA polymerase activity;RNA polymerase II, core complex;transcription by RNA polymerase II;transcription initiation from RNA polymerase II promoter;translation initiation factor binding;mRNA export from nucleus in response to heat stress;recruitment of 3'-end processing factors t…	Q9ZQY6.1(12.6);	Armadillo-like helical;Armadillo-type fold;Protein phosphatase 2A, regulatory B subunit, B56;	cytoplasm;cytosol;nucleolus;nucleus;protein dephosphorylation;protein phosphatase activator activity;protein phosphatase type 2A complex;regulation of protein autophosphorylation;signal transduction;
O65154.1	Single-copy	107	14.3917	49.7188	1.67349		RNA polymerase II transcriptional coactivator KIWI	DNA binding;transcription coactivator activity;nucleus;transcription regulator complex;positive regulation of transcription initiation from RNA polymerase II promoter;	O65155.1(64.8);Q9M1A9.1(12.4);	DEK, C-terminal;F-box associated domain, type 1;F-box associated interaction domain;Jacalin-like lectin domain;Jacalin-like lectin domain superfamily;Putative RNA polymerase II transcriptional coactivator KELP;Transcriptional coactivator p15 (PC4);ssDNA-binding transcriptional regulator;	DNA binding;carbohydrate binding;nucleus;positive regulation of transcription initiation from RNA polymerase II promoter;transcription coactivator activity;transcription regulator complex;
Q9ZU26.1	Homologous	124	27.7066	42.5427	1.6715	Q9LH88.1(70.9);Q1G3Z6.1(33.9);	Putative B3 domain-containing protein At1g51970	DNA binding;nucleus;	Q9SJ07.1(95.8);Q9C6P5.1(24.4);	AP2/ERF domain;AP2/ERF domain superfamily;AP2/ERF transcription factor ERF/PTI6;B3 DNA binding domain;DNA-binding domain superfamily;DNA-binding pseudobarrel domain superfamily;F-box associated domain, type 3;	DNA binding;DNA-binding transcription factor activity;ethylene-activated signaling pathway;nucleus;
Q38805.1	Homologous	77	14.021	49.9338	1.66162	P25860.2(119.7);	Metallothionein-like protein 2B	copper ion binding;	Q9SU91.1(13.6);	Acyl-[acyl-carrier-protein]--UDP-N-acetylglucosamine O-acyltransferase;Hexapeptide repeat;Trimeric LpxA-like superfamily;UDP N-acetylglucosamine O-acyltransferase, C-terminal;UDP-N-acetylglucosamine O-acyltransferase, C-terminal domain superfamily;	acyl-[acyl-carrier-protein]-UDP-N-acetylglucosamine O-acyltransferase activity;lipid A biosynthetic process;lipid X metabolic process;mitochondrion;
Q84WL9.1	Homologous	142	22.8359	44.5162	1.65641	O82201.1(123.1);	AP-2 complex subunit sigma	nucleus;plasma membrane;clathrin-coated pit;endocytosis;protein transport;vesicle-mediated transport;intracellular membrane-bounded organelle;	O22715.1(17.6);Q9SAC9.1(17.4);	AP complex, mu/sigma subunit;AP-2 complex subunit mu, C-terminal superfamily;Clathrin adaptor, mu subunit;Clathrin adaptor, mu subunit, conserved site;Longin-like domain superfamily;Mu homology domain;	Golgi apparatus;clathrin adaptor complex;clathrin-coated vesicle membrane;cytosol;early endosome membrane;intracellular protein transport;nucleus;vesicle-mediated transport;
P49205.3	Homologous	141	10.6345	53.0652	1.65174	Q9LZ17.3(268.5);Q9SJ36.3(261.6);Q9SQZ1.3(232.9);	40S ribosomal protein S17-1	structural constituent of ribosome;nucleolus;mitochondrion;cytosol;plasma membrane;translation;cytosolic small ribosomal subunit;	Q9LSH2.1(12.1);	Glutamate decarboxylase;Pyridoxal phosphate-dependent decarboxylase;Pyridoxal phosphate-dependent transferase;Pyridoxal phosphate-dependent transferase, major domain;	calmodulin binding;cytosol;glutamate catabolic process;glutamate decarboxylase activity;plasmodesma;pyridoxal phosphate binding;
Q9M0U1.1	Homologous	124	23.1212	44.0565	1.60698	B3H469.1(192.0);Q9LH88.1(32.1);	B3 domain-containing protein At4g05630	DNA binding;nucleus;	Q9SJ07.1(36.4);Q9C6M5.1(25.5);	AP2/ERF domain;AP2/ERF domain superfamily;B3 DNA binding domain;DNA-binding domain superfamily;DNA-binding pseudobarrel domain superfamily;F-box associated domain, type 3;	DNA binding;DNA-binding transcription factor activity;cellular response to hypoxia;ethylene-activated signaling pathway;nucleus;photoperiodism, flowering;transcription regulatory region DNA binding;
Q9LKU2.1	Single-copy	147	3.45495	68.5592	1.60324		Sec-independent protein translocase protein TATA, chloroplastic	chloroplast thylakoid membrane;chloroplast envelope;integral component of membrane;TAT protein transport complex;protein transport by the Tat complex;	Q9XH75.1(41.5);	Sec-independent protein translocase protein TatA/B/E;Sec-independent protein translocase protein TatA/E;	TAT protein transport complex;chloroplast;chloroplast envelope;chloroplast thylakoid;chloroplast thylakoid membrane;integral component of membrane;plastid;positive regulation of stomatal opening;protein import into chloroplast thylakoid membrane;protein transport by the Tat complex;proton motive force dependent protein transmembrane transporter activity;regulation of reactive oxygen species biosy…
Q8LGG0.2	Homologous	112	123.377	26.6857	1.6012	Q9FLB3.1(44.1);	Peptidyl-prolyl cis-trans isomerase FKBP12	protein peptidyl-prolyl isomerization;peptidyl-prolyl cis-trans isomerase activity;cytoplasm;cytosol;plastid;chaperone-mediated protein folding;	F4J9Q6.1(88.9);Q7DMA9.2(68.2);	FKBP-type peptidyl-prolyl cis-trans isomerase domain;Nucleoplasmin-like domain;Peptidyl-prolyl cis-trans isomerase Fpr3/Fpr4-like;Peptidyl-prolyl cis-trans isomerase PASTICCINO1;Tetratricopeptide repeat;Tetratricopeptide repeat-containing domain;Tetratricopeptide-like helical domain superfamily;	auxin-activated signaling pathway;cell differentiation;chaperone-mediated protein folding;cytokinin-activated signaling pathway;cytoplasm;cytosol;embryo development ending in seed dormancy;embryonic pattern specification;endoplasmic reticulum;endoplasmic reticulum membrane;establishment of cell polarity;integral component of membrane;lateral root development;nucleus;peptidyl-prolyl cis-trans isom…
Q9FGZ9.1	Single-copy	73	233.323	20.1164	1.57976		Ubiquitin-like protein 5	mRNA splicing, via spliceosome;nucleus;cytoplasm;cellular protein modification process;protein tag;	Q39256.1(37.8);Q8H159.2(37.2);P0CH32.1(33.9);Q3E7T8.2(30.2);Q1EC66.1(30.2);P0CH33.1(25.6);Q3E7K8.1(25.6);Q9SHE7.3(21.4);Q8RUC6.3(21.0);Q9FHQ6.1(19.2);	Nedd8-like ubiquitin;Ubiquitin conserved site;Ubiquitin domain;Ubiquitin-like domain;Ubiquitin-like domain superfamily;	cell wall;cellular protein modification process;cytoplasm;cytosol;endoplasmic reticulum;ethylene biosynthetic process;modification-dependent protein catabolic process;nucleolus;nucleus;plasma membrane;plastid;protein neddylation;protein tag;protein ubiquitination;response to UV-B;response to auxin;response to salicylic acid;ubiquitin protein ligase binding;ubiquitin-dependent protein catabolic pr…
Q9LRQ1.1	Single-copy	87	37.7427	38.6115	1.56756		Putative BTB/POZ domain-containing protein At3g29740	protein ubiquitination;	Q9LYL9.1(34.3);Q9SZI3.1(13.2);	Ankyrin repeat;Ankyrin repeat-containing domain;Ankyrin repeat-containing domain superfamily;BPM, C-terminal;BTB/POZ domain;NPR1/NIM1-like, C-terminal;Regulatory protein NPR, central domain;SKP1/BTB/POZ domain superfamily;	cytoplasm;defense response to bacterium;defense response to fungus;nucleus;protein ubiquitination;regulation of jasmonic acid mediated signaling pathway;response to chitin;
Q9LXJ2.1	Single-copy	72	19.6264	45.1196	1.50536		Cytochrome b-c1 complex subunit 9, mitochondrial	mitochondrion;mitochondrial respiratory chain complex III;cytosol;mitochondrial electron transport, ubiquinol to cytochrome c;integral component of membrane;	Q9SAV1.1(13.4);	Jacalin-like lectin domain;Jacalin-like lectin domain superfamily;Jacalin-like lectin domain, plant;	carbohydrate binding;cell adhesion;defense response;flower development;response to wounding;thioglucosidase binding;thioglucosidase complex;
Q9ZSJ6.2	Homologous	116	20.5278	44.6302	1.50481	Q9SL15.1(146.1);	Glycine-rich protein 3 short isoform	extracellular region;mitochondrion;	Q8VZT0.1(15.6);O80770.2(12.7);	H/ACA RNP complex subunit Gar1/Naf1, Cbf5-binding domain;H/ACA ribonucleoprotein complex, subunit Gar1/Naf1;KOW;NGN domain;NGN domain, eukaryotic;NusG, N-terminal;NusG, N-terminal domain superfamily;Ribosomal protein L2, domain 2;Ribosomal protein L24/L26, conserved site;Spt5 transcription elongation factor, N-terminal;Spt5, KOW domain repeat 1;Spt5, KOW domain repeat 2;Spt5, KOW domain repeat 3;…	DSIF complex;box H/ACA snoRNA binding;box H/ACA snoRNP complex;chloroplast thylakoid membrane;mRNA binding;nucleolus;regulation of DNA-templated transcription, elongation;regulation of transcription by RNA polymerase II;ribosome;snoRNA guided rRNA pseudouridine synthesis;structural constituent of ribosome;transcription elongation from RNA polymerase II promoter;translation;
A9JTY4.2	Single-copy	144	9.57525	53.1722	1.50071		Protection of telomeres protein 1c	telomere maintenance;nuclear chromosome, telomeric region;single-stranded telomeric DNA binding;	Q9FLA2.1(13.2);	F-box domain;F-box-like domain superfamily;FBD domain;Leucine-rich repeat 2;Leucine-rich repeat domain superfamily;
Q9SGE2.1	Homologous	111	1.88351	81.8369	1.44203	Q9LZ60.1(33.3);	Cyclin-dependent protein kinase inhibitor SMR2	protein kinase inhibitor activity;nucleus;cell cycle;regulation of DNA endoreduplication;negative regulation of cell cycle;negative regulation of mitotic nuclear division;	Q9ZV27.1(40.7);O80930.1(32.9);Q9LTJ2.1(24.3);	Cyclin-dependent protein kinase inhibitor SMR;	cell cycle;negative regulation of cell cycle;negative regulation of mitotic nuclear division;nucleus;protein kinase inhibitor activity;regulation of DNA endoreduplication;
P92517.1	Single-copy	109	9.42717	52.856	1.43852		Uncharacterized mitochondrial protein AtMg00760	mitochondrion;	Q5BPL5.1(13.9);	Etoposide-induced 2.4;	endoplasmic reticulum;integral component of membrane;macroautophagy;
Q6NMS3.1	Homologous	91	31.6013	39.4769	1.42579	Q8L7G7.1(88.5);Q94AZ8.1(55.3);P82794.1(53.2);	Defensin-like protein 95	extracellular region;killing of cells of other organism;defense response to fungus;	Q9SR93.2(13.0);Q9M028.1(13.0);	LMBR1-like membrane protein;	cytosol;integral component of membrane;plasma membrane;plasmodesma;
Q570U6.1	Homologous	114	16.5818	46.3	1.41756	Q94BS8.1(195.7);Q8S8F5.1(131.6);O04211.1(64.4);O80877.1(61.5);	Protein ELF4-LIKE 4	nucleus;photoperiodism;entrainment of circadian clock;positive regulation of circadian rhythm;protein homodimerization activity;rhythmic process;	Q93VH6.1(14.0);Q9C615.1(12.7);Q9MAL9.1(12.1);	Late embryogenesis abundant protein, LEA_2 subgroup;SNARE;SS18 family;Syntaxin, N-terminal domain;Target SNARE coiled-coil homology domain;	SNAP receptor activity;SNARE binding;SNARE complex;cell division;cell population proliferation;endomembrane system;integral component of membrane;intracellular protein transport;leaf development;nucleus;positive regulation of transcription by RNA polymerase II;positive regulation of transcription, DNA-templated;transcription coactivator activity;vesicle docking;vesicle fusion;
P93291.1	Single-copy	101	12.0418	49.8505	1.41663		Uncharacterized mitochondrial protein AtMg00260	mitochondrion;	B3LF83.1(12.9);	Cytochrome P450;Cytochrome P450 superfamily;Cytochrome P450, E-class, group IV;	chloroplast envelope;fatty acid metabolic process;heme binding;iron ion binding;monooxygenase activity;oxidation-reduction process;oxidoreductase activity;oxidoreductase activity, acting on paired donors, with incorporation or reduction of molecular oxygen;response to wounding;sterol metabolic process;
Q9FL96.1	Homologous	73	25.8029	41.5411	1.41643	Q9XIR8.1(115.2);	Protein DSS1 HOMOLOG ON CHROMOSOME V	proteasome complex;double-strand break repair via homologous recombination;mRNA export from nucleus;proteasome regulatory particle, lid subcomplex;proteasome assembly;	F4JMJ1.1(16.6);	Heat shock protein 70 family;Heat shock protein 70, conserved site;Heat shock protein 70kD, C-terminal domain superfamily;Heat shock protein 70kD, peptide-binding domain superfamily;	ATP binding;Golgi apparatus;cellular response to hypoxia;cytosol;endoplasmic reticulum;endoplasmic reticulum chaperone complex;endoplasmic reticulum lumen;negative regulation of hypoxia-induced intrinsic apoptotic signaling pathway;secretory vesicle;vacuolar membrane;
Q2V3I3.1	Homologous	109	2.03585	77.8917	1.39996	Q9LUH9.1(125.3);C4B8C4.1(35.1);Q1G3V9.1(32.7);	EPIDERMAL PATTERNING FACTOR-like protein 4	extracellular region;guard cell differentiation;stomatal complex development;	Q1PEY6.1(80.2);C4B8C5.1(15.4);	EPIDERMAL PATTERNING FACTOR-like protein;	extracellular region;guard cell differentiation;stomatal complex development;
Q9LX26.1	Homologous	148	50.2395	34.4635	1.39785	Q9LNE7.1(52.2);P0DH95.1(39.1);P0DH96.1(39.1);P0DH97.1(39.0);P0DH98.1(39.0);Q682T9.1(39.0);Q03509.2(38.4);P59220.2(38.1);	Probable calcium-binding protein CML1	calcium ion binding;	Q8RWL2.2(99.6);	EF-Hand 1, calcium-binding site;EF-hand domain;EF-hand domain pair;Protein kinase domain;Protein kinase, ATP binding site;Protein kinase-like domain superfamily;Serine/threonine-protein kinase, active site;	ATP binding;calcium ion binding;calcium-dependent protein serine/threonine kinase activity;calmodulin binding;cytoplasm;defense response to fungus;intracellular signal transduction;mitochondrion;nucleus;peptidyl-serine phosphorylation;plasma membrane;positive regulation of response to salt stress;protein autophosphorylation;
O64650.1	Homologous	84	17.044	45.669	1.37517	Q9M2F1.2(170.4);Q8L953.2(163.8);	40S ribosomal protein S27-1	ribosomal small subunit assembly;RNA binding;mRNA binding;structural constituent of ribosome;nucleolus;cytosol;plasma membrane;translation;plasmodesma;cytosolic ribosome;cytosolic small ribosomal subunit;metal ion binding;	P0C5B6.1(13.0);	AMP-binding enzyme, C-terminal domain;AMP-binding, conserved site;AMP-dependent synthetase-like superfamily;AMP-dependent synthetase/ligase;	ATP binding;ligase activity;peroxisome;
Q9FED2.1	Homologous	116	49.1994	34.4431	1.3662	Q9S760.1(187.7);	HVA22-like protein e	response to cold;response to water deprivation;response to abscisic acid;integral component of membrane;hyperosmotic salinity response;	Q9S7V4.1(117.2);Q682H0.1(113.5);Q9SYX7.2(102.3);Q9S784.1(102.1);Q6NLY8.1(56.8);Q9LR09.2(43.5);Q8LEM6.2(41.3);Q8LE10.2(38.9);Q8GXE9.2(31.6);	TB2/DP1/HVA22-related protein;	hyperosmotic salinity response;integral component of membrane;plasmodesma;response to abscisic acid;response to cold;response to water deprivation;
Q9ZU51.2	Homologous	147	15.7589	46.3905	1.3584	Q9M0R7.1(38.1);Q9SZL4.1(35.2);	E3 ubiquitin-protein ligase RHA2B	ubiquitin-protein transferase activity;nucleus;cytoplasm;abscisic acid-activated signaling pathway;positive regulation of abscisic acid-activated signaling pathway;protein ubiquitination;transcription regulatory region DNA binding;metal ion binding;regulation of response to osmotic stress;ubiquitin protein ligase activity;cellular response to hypoxia;response to karrikin;	Q9C7I1.1(100.3);	Zinc finger, RING-CH-type;Zinc finger, RING-type;Zinc finger, RING/FYVE/PHD-type;	integral component of membrane;protein ubiquitination;transferase activity;zinc ion binding;
Q9CAX6.1	Homologous	150	8.26233	53.492	1.33024	Q9SIH0.1(295.3);P42036.2(293.4);P56802.1(48.2);	40S ribosomal protein S14-2	ribosomal small subunit assembly;maturation of SSU-rRNA from tricistronic rRNA transcript (SSU-rRNA, 5.8S rRNA, LSU-rRNA);mRNA binding;structural constituent of ribosome;nucleolus;cytosol;translation;cytosolic ribosome;cytosolic small ribosomal subunit;polysomal ribosome;mRNA 5'-UTR binding;small ribosomal subunit rRNA binding;	Q8VZT8.1(46.6);	Ribosomal protein S11;Ribosomal protein S11 superfamily;	karyogamy;mRNA 5'-UTR binding;maturation of SSU-rRNA from tricistronic rRNA transcript (SSU-rRNA, 5.8S rRNA, LSU-rRNA);mitochondrial small ribosomal subunit;polar nucleus fusion;ribosomal small subunit assembly;small ribosomal subunit rRNA binding;structural constituent of ribosome;translation;
Q9LIS2.1	Homologous	136	5.75871	57.8051	1.31314	Q9FFZ6.1(82.5);Q9SIX3.2(80.4);	Glycine-rich RNA-binding protein 4, mitochondrial	double-stranded DNA binding;single-stranded DNA binding;RNA binding;nucleus;mitochondrion;cytosol;response to osmotic stress;response to cold;response to water deprivation;response to salt stress;regulation of RNA metabolic process;mitochondrial RNA modification;ribonucleoprotein complex;	Q9LIN3.1(103.4);	Nucleotide-binding alpha-beta plait domain superfamily;RNA recognition motif domain;RNA-binding domain superfamily;Zinc finger, CCHC-type;Zinc finger, CCHC-type superfamily;	DNA binding;RNA binding;cytoplasm;cytosol;mRNA binding;nucleotide binding;nucleus;regulation of RNA metabolic process;response to cold;ribonucleoprotein complex;zinc ion binding;
Q9LYY2.1	Homologous	112	40.9555	35.7287	1.28838	Q9SF33.1(185.6);Q8RV04.1(184.3);	Mitochondrial import inner membrane translocase subunit TIM14-3	PAM complex, Tim23 associated import motor;ATPase activator activity;integral component of membrane;protein import into mitochondrial matrix;	Q94AW8.2(16.5);P42825.2(15.9);Q8RXN4.1(14.9);	Chaperone DnaJ;Chaperone DnaJ, C-terminal;Chaperone J-domain superfamily;ClpP/crotonase-like domain superfamily;DnaJ domain;DnaJ domain, conserved site;Enoyl-CoA hydratase/isomerase, HIBYL-CoA-H type;HSP40/DnaJ peptide-binding;Heat shock protein DnaJ, cysteine-rich domain;Heat shock protein DnaJ, cysteine-rich domain superfamily;	3-hydroxyisobutyryl-CoA hydrolase activity;ATP binding;cell wall;cytosol;heat shock protein binding;metal ion binding;mitochondrion;nucleolus;photoperiodism, flowering;plasma membrane;plasmodesma;plastid;positive regulation of flower development;protein folding;regulation of ATPase activity;response to heat;response to salt stress;unfolded protein binding;
Q1PFS7.1	Single-copy	106	22.3476	41.7925	1.25622		Uncharacterized protein At1g24060		Q9XIE1.3(14.5);	Histone deacetylase interacting domain;Paired amphipathic helix;Paired amphipathic helix superfamily;Sin3, C-terminal;Transcriptional regulatory protein Sin3-like;	chromatin;histone deacetylase complex;histone deacetylation;negative regulation of transcription by RNA polymerase II;transcription corepressor activity;
Q8L5V0.1	Homologous	114	11.5997	48.7675	1.23952	Q6NLH0.1(233.7);	DNA-directed RNA polymerases II, IV and V subunit 9B	RNA polymerase IV complex;RNA polymerase V complex;maintenance of transcriptional fidelity during DNA-templated transcription elongation from RNA polymerase II promoter;nucleic acid binding;DNA-directed 5'-3' RNA polymerase activity;RNA polymerase II, core complex;nucleolus;transcription-coupled nucleotide-excision repair;transcription initiation from RNA polymerase II promoter;mRNA cleavage;zinc…	Q9ZVH8.1(14.9);	TFIIS/LEDGF domain superfamily;Transcription elongation factor S-II, central domain;Transcription elongation factor S-II, central domain superfamily;Transcription elongation factor, IIS-type;Transcription elongation factor, TFIIS;Transcription elongation factor, TFIIS/CRSP70, N-terminal, sub-type;Transcription factor IIS, N-terminal;Zinc finger, TFIIS-type;	negative regulation of flower development;nucleus;regulation of transcription elongation from RNA polymerase II promoter;response to gibberellin;seed dormancy process;seed germination;transcription, DNA-templated;translation elongation factor activity;zinc ion binding;
F4IWB3.1	Homologous	108	1.6237	81.5306	1.23413	Q3ECS5.1(92.4);Q1G3Y4.1(33.2);Q29Q81.1(31.2);	Cyclin-dependent protein kinase inhibitor SMR13	protein kinase inhibitor activity;nucleus;cell cycle;regulation of DNA endoreduplication;negative regulation of cell cycle;negative regulation of mitotic nuclear division;	O80930.1(33.5);Q9ZV27.1(20.8);	Cyclin-dependent protein kinase inhibitor SMR;	cell cycle;negative regulation of cell cycle;negative regulation of mitotic nuclear division;nucleus;protein kinase inhibitor activity;regulation of DNA endoreduplication;
Q9SIH0.1	Homologous	150	8.26233	52.49	1.22217	Q9CAX6.1(295.2);P42036.2(291.0);P56802.1(48.2);	40S ribosomal protein S14-1	ribosomal small subunit assembly;maturation of SSU-rRNA from tricistronic rRNA transcript (SSU-rRNA, 5.8S rRNA, LSU-rRNA);structural constituent of ribosome;vacuolar membrane;endoplasmic reticulum;cytosol;plasma membrane;translation;plasmodesma;cytosolic ribosome;cytosolic small ribosomal subunit;polysomal ribosome;mRNA 5'-UTR binding;small ribosomal subunit rRNA binding;	Q8VZT8.1(46.6);	Ribosomal protein S11;Ribosomal protein S11 superfamily;	karyogamy;mRNA 5'-UTR binding;maturation of SSU-rRNA from tricistronic rRNA transcript (SSU-rRNA, 5.8S rRNA, LSU-rRNA);mitochondrial small ribosomal subunit;polar nucleus fusion;ribosomal small subunit assembly;small ribosomal subunit rRNA binding;structural constituent of ribosome;translation;
O64847.1	Homologous	108	44.8373	34.014	1.19416	Q9C6T7.1(51.3);Q9LJU6.1(46.7);	Protein FATTY ACID EXPORT 7	mitochondrion;membrane;integral component of membrane;	Q94A32.1(101.0);Q93V66.1(63.0);Q8LPG1.1(37.5);Q9ZVH7.2(30.6);	TMEM14 family;	Golgi apparatus;chloroplast;chloroplast envelope;chloroplast inner membrane;chloroplast membrane;cytosol;fatty acid transmembrane transport;fatty acid transmembrane transporter activity;fatty acid transport;integral component of membrane;lipid homeostasis;membrane;mitochondrion;plant-type cell wall assembly;plastid;pollen wall assembly;
Q9SQZ1.3	Homologous	140	10.7741	49.1271	1.1888	Q9SJ36.3(237.2);Q9LZ17.3(235.7);P49205.3(233.2);	40S ribosomal protein S17-3	structural constituent of ribosome;cytosol;translation;cytosolic ribosome;cytosolic small ribosomal subunit;	Q9LSH2.1(12.2);	Glutamate decarboxylase;Pyridoxal phosphate-dependent decarboxylase;Pyridoxal phosphate-dependent transferase;Pyridoxal phosphate-dependent transferase, major domain;	calmodulin binding;cytosol;glutamate catabolic process;glutamate decarboxylase activity;plasmodesma;pyridoxal phosphate binding;
Q2L6T1.1	Single-copy	93	12.1454	47.4689	1.15481		Putative defensin-like protein 283	extracellular region;killing of cells of other organism;defense response to fungus;	Q9LVT8.1(12.9);	Hyaluronan/mRNA-binding protein;RNA binding protein HABP4/SERBP1;Stm1-like, N-terminal;	mRNA binding;nucleus;perinuclear region of cytoplasm;plasma membrane;plastid;
P93304.1	Single-copy	107	18.6438	42.5243	1.12281		Uncharacterized mitochondrial protein AtMg00490	mitochondrion;	P92567.1(52.9);P92543.1(50.6);	RNA-dependent RNA polymerase, mitoviral;	mitochondrion;
Q3E8L0.1	Homologous	97	5.56017	56.1928	1.117	Q3E965.2(33.2);	Protein GLUTAMINE DUMPER 7	amino acid transport;integral component of membrane;regulation of amino acid export;	O81775.1(104.1);Q8S8A0.1(104.1);	Protein glutamine dumper;	amino acid transport;glutamine secretion;integral component of membrane;membrane;nucleus;plasma membrane;regulation of amino acid export;regulation of cellular amino acid metabolic process;
P92526.1	Single-copy	106	2.53786	67.1877	1.09167		Uncharacterized mitochondrial protein AtMg00890	mitochondrion;	Q0WNX9.2(12.4);	Cyclin-dependent kinase inhibitor;	cell cycle arrest;cyclin-dependent protein serine/threonine kinase inhibitor activity;kinase binding;male germ cell nucleus;negative regulation of cyclin-dependent protein serine/threonine kinase activity;nucleoplasm;
Q8GWU1.2	Homologous	101	66.3961	29.0495	1.08771	Q3E7N5.1(37.0);Q1G3Z6.1(36.4);Q9LH88.1(30.4);	B3 domain-containing protein At1g08985	DNA binding;nucleus;	Q9SJ07.1(109.8);Q9LS06.1(26.3);Q9ZWM9.1(25.6);	AP2/ERF domain;AP2/ERF domain superfamily;B3 DNA binding domain;DNA-binding domain superfamily;DNA-binding pseudobarrel domain superfamily;F-box associated domain, type 3;	DNA binding;DNA-binding transcription factor activity;cellular response to hypoxia;ethylene-activated signaling pathway;lateral root development;leaf development;negative regulation of flower development;negative regulation of transcription, DNA-templated;nucleus;response to brassinosteroid;transcription regulatory region DNA binding;
Q56YT7.1	Single-copy	130	2.79685	65.3938	1.08193		Vascular-related unknown protein 3	multidimensional cell growth;xylem development;	Q9C6I7.1(81.9);Q9LSZ3.1(15.2);	VASCULAR-RELATED UNKNOWN PROTEIN;	cytosol;kinase activity;multidimensional cell growth;nucleus;xylem development;
Q9SF33.1	Homologous	112	40.9555	33.9037	1.07912	Q9LYY2.1(185.8);Q8RV04.1(184.7);	Mitochondrial import inner membrane translocase subunit TIM14-2	PAM complex, Tim23 associated import motor;ATPase activator activity;integral component of membrane;protein import into mitochondrial matrix;	Q94AW8.2(16.5);P42825.2(15.9);Q8RXN4.1(14.9);	Chaperone DnaJ;Chaperone DnaJ, C-terminal;Chaperone J-domain superfamily;ClpP/crotonase-like domain superfamily;DnaJ domain;DnaJ domain, conserved site;Enoyl-CoA hydratase/isomerase, HIBYL-CoA-H type;HSP40/DnaJ peptide-binding;Heat shock protein DnaJ, cysteine-rich domain;Heat shock protein DnaJ, cysteine-rich domain superfamily;	3-hydroxyisobutyryl-CoA hydrolase activity;ATP binding;cell wall;cytosol;heat shock protein binding;metal ion binding;mitochondrion;nucleolus;photoperiodism, flowering;plasma membrane;plasmodesma;plastid;positive regulation of flower development;protein folding;regulation of ATPase activity;response to heat;response to salt stress;unfolded protein binding;
Q6NLH0.1	Homologous	114	11.5997	47.1623	1.07269	Q8L5V0.1(233.7);	DNA-directed RNA polymerases II, IV and V subunit 9A	RNA polymerase V complex;maintenance of transcriptional fidelity during DNA-templated transcription elongation from RNA polymerase II promoter;nucleic acid binding;DNA-directed 5'-3' RNA polymerase activity;RNA polymerase II, core complex;nucleolus;transcription-coupled nucleotide-excision repair;transcription initiation from RNA polymerase II promoter;mRNA cleavage;zinc ion binding;	Q9ZVH8.1(14.9);	TFIIS/LEDGF domain superfamily;Transcription elongation factor S-II, central domain;Transcription elongation factor S-II, central domain superfamily;Transcription elongation factor, IIS-type;Transcription elongation factor, TFIIS;Transcription elongation factor, TFIIS/CRSP70, N-terminal, sub-type;Transcription factor IIS, N-terminal;Zinc finger, TFIIS-type;	negative regulation of flower development;nucleus;regulation of transcription elongation from RNA polymerase II promoter;response to gibberellin;seed dormancy process;seed germination;transcription, DNA-templated;translation elongation factor activity;zinc ion binding;
A8MQM2.1	Homologous	81	31.4186	36.3099	1.04555	A8MRD4.1(116.3);A8MRK3.1(69.9);A8MRM1.1(67.0);A8MQ92.1(33.0);A8MQL7.1(31.5);A8MQM7.1(31.5);A8MQP2.1(31.1);A7REE5.1(30.6);	Protein RALF-like 6	hormone activity;cell-cell signaling;calcium-mediated signaling;apoplast;	O80497.1(12.6);O64890.1(12.0);	Glycoside hydrolase family 9;Glycoside hydrolase family 9, His active site;Six-hairpin glycosidase superfamily;Six-hairpin glycosidase-like superfamily;	cell wall organization;cellulase activity;cellulose catabolic process;extracellular region;
Q8LCS8.1	Homologous	124	127.015	21.9194	1.02851	Q9MAB9.1(176.0);Q8GWJ6.1(113.9);Q9SH14.1(112.1);Q9SW27.1(106.0);Q9LSD8.1(103.1);	Membrane-anchored ubiquitin-fold protein 2	plasma membrane;	Q8H159.2(55.2);P0CH32.1(47.6);Q3E7T8.2(39.8);Q1EC66.1(39.7);P0CH33.1(31.4);Q9FHQ6.1(27.8);Q3E7K8.1(26.8);Q39256.1(24.8);	Ubiquitin conserved site;Ubiquitin domain;Ubiquitin-like domain;Ubiquitin-like domain superfamily;	cell wall;cellular protein modification process;cytoplasm;cytosol;modification-dependent protein catabolic process;nucleolus;nucleus;plasma membrane;plastid;protein tag;protein ubiquitination;response to UV-B;response to salicylic acid;ubiquitin protein ligase binding;ubiquitin-dependent protein catabolic process;vacuolar membrane;vacuole;
Q8GY31.1	Single-copy	146	12.5164	45.839	1.02576		Dual specificity phosphatase Cdc25	protein tyrosine phosphatase activity;nucleus;cytoplasm;mitochondrion;protein phosphorylation;cell cycle;arsenate reductase (glutaredoxin) activity;chloroplast;response to arsenic-containing substance;metal ion binding;cell division;	Q9C7X7.1(12.1);	Heat shock protein 70 family;Heat shock protein 70, conserved site;Heat shock protein 70kD, C-terminal domain superfamily;Heat shock protein 70kD, peptide-binding domain superfamily;	ATP binding;ATPase activity;cellular response to unfolded protein;chaperone cofactor-dependent protein refolding;chloroplast envelope;cytoplasm;cytosol;heat shock protein binding;misfolded protein binding;protein folding chaperone;protein refolding;response to cadmium ion;response to heat;response to unfolded protein;unfolded protein binding;
Q8VY77.1	Single-copy	91	15.4635	43.522	1.02252		Protein TRIGALACTOSYLDIACYLGLYCEROL 5, chloroplastic	lipid transporter activity;chloroplast envelope;integral component of membrane;chloroplast membrane;endoplasmic reticulum to chloroplast transport;ER to chloroplast lipid transport;	Q9ZPR7.1(12.3);P42735.1(11.7);	Cadmium-induced protein AS8-like;Ureide permease;Ureide permease, plant;	ATP binding;allantoin transport;allantoin:proton symporter activity;integral component of membrane;membrane;pyrimidine nucleobase salvage;uracil transmembrane transporter activity;uracil transport;uracil:cation symporter activity;
Q94CG2.4	Homologous	130	23.4763	39.09	1.02075	Q9M2J9.1(138.6);	Bet1-like SNARE 1-2	SNAP receptor activity;endoplasmic reticulum membrane;endoplasmic reticulum to Golgi vesicle-mediated transport;protein transport;integral component of Golgi membrane;	Q946Y7.1(31.7);Q9SRV7.1(26.0);P93654.1(14.3);Q8VZU2.1(14.0);	SNARE;Syntaxin 6, N-terminal;Syntaxin, N-terminal domain;Syntaxin/epimorphin, conserved site;Target SNARE coiled-coil homology domain;	Golgi vesicle transport;SNAP receptor activity;SNARE binding;SNARE complex;abscisic acid-activated signaling pathway;amyloplast organization;endomembrane system;exocytosis;integral component of membrane;intracellular protein transport;late endosome membrane;late endosome to vacuole transport;negative gravitropism;plant-type vacuole;plant-type vacuole membrane;plasma membrane;stomatal movement;tra…
Q93VM8.1	Homologous	146	7.00837	52.0988	1.0026	Q8GWP3.1(54.4);Q8SAA5.2(42.3);	Copper transporter 5	copper ion transmembrane transporter activity;cell;late endosome;vacuole;vacuolar membrane;Golgi apparatus;plasma membrane;cellular copper ion homeostasis;plasmodesma;plastid;response to abscisic acid;protein maturation by copper ion transfer;integral component of membrane;	Q9SNB6.1(10.7);	Domain of unknown function DUF1117;E3 ubiquitin-protein ligase RNF126-like, zinc-ribbon;Zinc finger, RING-type;Zinc finger, RING/FYVE/PHD-type;	abscisic acid-activated signaling pathway;cytoplasm;cytosol;metal ion binding;nucleus;protein autoubiquitination;protein ubiquitination;response to abscisic acid;response to chitin;response to water deprivation;ubiquitin protein ligase activity;ubiquitin-protein transferase activity;
Q9FN32.1	Homologous	129	35.0574	34.6426	0.992557	Q9SR97.2(145.4);Q9LY56.1(142.5);Q9C777.1(141.3);Q9T096.2(113.1);Q2V3E2.1(80.3);	Protein yippee-like At5g53940	ubiquitin ligase complex;metal ion binding;	Q7PC83.1(15.5);Q9C8P0.1(12.8);	2-oxo acid dehydrogenase, lipoyl-binding site;2-oxoacid dehydrogenase acyltransferase, catalytic domain;AAA+ ATPase domain;ABC transporter-like;ABC-2 type transporter;ABC-transporter N-terminal domain;ATP-binding cassette transporter, PDR-like subfamily G, domain 2;Biotin/lipoyl attachment;Chloramphenicol acetyltransferase-like domain superfamily;E3-binding domain superfamily;P-loop containing nu…	ATP binding;ATPase activity;ATPase-coupled transmembrane transporter activity;chloroplast;chloroplast envelope;chloroplast stroma;cytosolic ribosome;dihydrolipoyllysine-residue acetyltransferase activity;glycolytic process;integral component of membrane;nucleus;plasma membrane;protein domain specific binding;transmembrane transport;
Q8LE92.1	Homologous	71	16.0533	42.6746	0.980545	Q941C7.1(50.3);	Protein PSY2	extracellular region;growth factor activity;	Q9SIW1.1(11.9);	Homeobox KN domain;Homeobox domain;Homeobox-like domain superfamily;POX domain;	DNA-binding transcription factor activity;nucleus;transcription regulatory region DNA binding;
Q9M9L0.3	Homologous	84	41.0755	32.6917	0.961644	Q940X7.1(63.3);Q9M2B0.1(58.5);	Anaphase-promoting complex subunit 11	ubiquitin-protein transferase activity;anaphase-promoting complex;cytoplasm;cell cycle;metal ion binding;cell division;	Q7X843.2(33.3);Q8LE94.1(31.9);	Hypoxia induced protein, domain;Zinc finger, RING-H2-type;Zinc finger, RING-type;Zinc finger, RING/FYVE/PHD-type;	cytoplasm;integral component of membrane;metal ion binding;protein ubiquitination;transferase activity;ubiquitin protein ligase binding;ubiquitin-protein transferase activity;zinc ion binding;
Q2V3D7.1	Homologous	81	18.8552	40.7272	0.958245	Q2V4I8.1(55.1);Q2V3S0.1(48.0);Q2V3R9.1(43.3);	Putative defensin-like protein 31	extracellular region;killing of cells of other organism;defense response to fungus;	Q940G0.1(13.9);	Nonaspanin (TM9SF);	Golgi apparatus;Golgi cis cisterna;Golgi medial cisterna;Golgi membrane;cis-Golgi network;endosome;endosome membrane;extracellular region;integral component of membrane;membrane;protein localization to membrane;trans-Golgi network;
Q8S8F5.1	Homologous	109	18.0966	40.8881	0.933842	Q570U6.1(131.7);Q94BS8.1(127.9);O04211.1(67.9);O80877.1(64.6);	Protein ELF4-LIKE 3	nucleus;entrainment of circadian clock;positive regulation of circadian rhythm;protein homodimerization activity;rhythmic process;	Q93VH6.1(13.6);Q9C615.1(12.7);Q9MAL9.1(12.1);	Late embryogenesis abundant protein, LEA_2 subgroup;SNARE;SS18 family;Syntaxin, N-terminal domain;Target SNARE coiled-coil homology domain;	SNAP receptor activity;SNARE binding;SNARE complex;cell division;cell population proliferation;endomembrane system;integral component of membrane;intracellular protein transport;leaf development;nucleus;positive regulation of transcription by RNA polymerase II;positive regulation of transcription, DNA-templated;transcription coactivator activity;vesicle docking;vesicle fusion;
Q9SZL4.1	Homologous	145	16.5797	41.7214	0.925765	Q9M0R7.1(40.8);Q9ZU51.2(35.6);	RING-H2 finger protein ATL18	integral component of membrane;protein ubiquitination;transferase activity;anchored component of membrane;ubiquitin protein ligase binding;metal ion binding;	Q9C7I1.1(100.3);	Zinc finger, RING-CH-type;Zinc finger, RING-type;Zinc finger, RING/FYVE/PHD-type;	integral component of membrane;protein ubiquitination;transferase activity;zinc ion binding;
Q9ZV52.2	Homologous	130	51.5797	29.8469	0.913879	Q9M0C2.1(78.5);	EG45-like domain containing protein 2	cell wall;systemic acquired resistance;alternative respiration;apoplast;	Q9SHD1.1(34.1);O22874.1(31.2);Q9LZT4.1(28.2);Q9SVE5.1(27.9);Q9LQ07.1(27.8);O23547.2(27.6);Q9M0I2.2(27.2);Q38864.1(26.3);Q9LZT5.1(25.7);Q9LNU3.1(25.3);	Expansin;Expansin, cellulose-binding-like domain;Expansin, cellulose-binding-like domain superfamily;Expansin/Lol pI;Expansin/pollen allergen, DPBB domain;Major pollen allergen Lol pI;RlpA-like domain superfamily;RlpA-like protein, double-psi beta-barrel domain;	Golgi apparatus;cell wall;cell wall organization;cytosol;extracellular region;integral component of membrane;membrane;plant-type cell wall;plant-type cell wall organization;plasmodesma;primary root development;secretory vesicle;sexual reproduction;syncytium formation;unidimensional cell growth;
Q8S8I4.1	Homologous	104	3.88982	58.0394	0.903129	Q8LC53.1(53.7);Q9LUH9.1(33.8);	Protein EPIDERMAL PATTERNING FACTOR 1	extracellular region;guard cell differentiation;stomatal complex development;stomatal complex patterning;negative regulation of stomatal complex development;	Q1PEY6.1(77.0);C4B8C5.1(55.2);	EPIDERMAL PATTERNING FACTOR-like protein;	extracellular region;guard cell differentiation;stomatal complex development;
Q42340.1	Homologous	146	12.4693	44.276	0.884521	Q9SK22.1(302.1);Q9M8X9.1(267.5);	40S ribosomal protein S16-3	maturation of SSU-rRNA from tricistronic rRNA transcript (SSU-rRNA, 5.8S rRNA, LSU-rRNA);RNA binding;mRNA binding;structural constituent of ribosome;translation;plasmodesma;chloroplast;plastid;small ribosomal subunit;cytosolic small ribosomal subunit;	Q8L6Z4.1(19.7);Q9XJ27.1(16.9);	Ribosomal protein S5 domain 2-type fold;Ribosomal protein S5 domain 2-type fold, subgroup;Ribosomal protein S9;Ribosomal protein S9, bacterial/plastid;Ribosomal protein S9, conserved site;	RNA binding;chloroplast;chloroplast envelope;chloroplast stroma;cytosol;embryo sac central cell differentiation;gametophyte development;mitochondrial small ribosomal subunit;mitochondrion;plastid small ribosomal subunit;pollen development;rRNA binding;small ribosomal subunit;structural constituent of ribosome;translation;
Q9SK22.1	Homologous	146	12.4693	44.276	0.884521	Q42340.1(302.1);Q9M8X9.1(267.2);	40S ribosomal protein S16-1	maturation of SSU-rRNA from tricistronic rRNA transcript (SSU-rRNA, 5.8S rRNA, LSU-rRNA);RNA binding;structural constituent of ribosome;cell wall;mitochondrion;cytosol;translation;plasmodesma;chloroplast;small ribosomal subunit;cytosolic ribosome;cytosolic small ribosomal subunit;polysomal ribosome;	Q8L6Z4.1(19.7);Q9XJ27.1(16.9);	Ribosomal protein S5 domain 2-type fold;Ribosomal protein S5 domain 2-type fold, subgroup;Ribosomal protein S9;Ribosomal protein S9, bacterial/plastid;Ribosomal protein S9, conserved site;	RNA binding;chloroplast;chloroplast envelope;chloroplast stroma;cytosol;embryo sac central cell differentiation;gametophyte development;mitochondrial small ribosomal subunit;mitochondrion;plastid small ribosomal subunit;pollen development;rRNA binding;small ribosomal subunit;structural constituent of ribosome;translation;
O80877.1	Homologous	125	13.6022	43.2968	0.880708	O04211.1(78.0);Q8S8F5.1(64.6);Q570U6.1(61.6);Q94BS8.1(55.5);	Protein ELF4-LIKE 1	nucleus;entrainment of circadian clock;positive regulation of circadian rhythm;protein homodimerization activity;rhythmic process;	Q93VH6.1(13.6);Q9C615.1(12.7);Q9MAL9.1(12.1);	Late embryogenesis abundant protein, LEA_2 subgroup;SNARE;SS18 family;Syntaxin, N-terminal domain;Target SNARE coiled-coil homology domain;	SNAP receptor activity;SNARE binding;SNARE complex;cell division;cell population proliferation;endomembrane system;integral component of membrane;intracellular protein transport;leaf development;nucleus;positive regulation of transcription by RNA polymerase II;positive regulation of transcription, DNA-templated;transcription coactivator activity;vesicle docking;vesicle fusion;
Q9M7I9.1	Single-copy	146	17.7264	40.1685	0.854286		Stress enhanced protein 1, chloroplastic	photosystem II;chloroplast thylakoid membrane;response to wounding;response to high light intensity;photosynthesis;integral component of membrane;chlorophyll binding;cellular response to high light intensity;cellular response to UV-A;	Q9XF91.1(33.9);Q94K66.1(19.5);P93735.1(18.7);O04921.1(16.8);	Chlorophyll A-B binding protein;Chlorophyll a/b binding domain superfamily;Ferrochelatase;Ferrochelatase, C-terminal;Ferrochelatase, N-terminal;Ferrochelatase, active site;	PSII associated light-harvesting complex II;cellular response to UV-A;cellular response to blue light;cellular response to far red light;cellular response to heat;cellular response to high light intensity;cellular response to red light;chlorophyll binding;chloroplast;chloroplast membrane;chloroplast thylakoid;chloroplast thylakoid membrane;ferrochelatase activity;heme biosynthetic process;integra…
P93284.1	Single-copy	116	14.2361	42.4578	0.852017		Uncharacterized mitochondrial protein AtMg00150	integral component of membrane;mitochondrial membrane;	Q9CA71.3(13.5);	Xyloglucan fucosyltransferase;	Golgi apparatus;Golgi cisterna membrane;cell wall organization;galactoside 2-alpha-L-fucosyltransferase activity;integral component of membrane;protein glycosylation;xyloglucan biosynthetic process;
A8MRK3.1	Homologous	79	35.4301	32.9532	0.850924	A8MRD4.1(70.4);A8MQM2.1(70.1);A8MRM1.1(51.8);	Protein RALF-like 35	hormone activity;extracellular region;calcium-mediated signaling;	O64890.1(14.3);O80497.1(13.7);	Glycoside hydrolase family 9;Glycoside hydrolase family 9, His active site;Six-hairpin glycosidase superfamily;Six-hairpin glycosidase-like superfamily;	cell wall organization;cellulase activity;cellulose catabolic process;extracellular region;
P25860.2	Homologous	81	13.4855	42.8827	0.839942	Q38805.1(119.5);	Metallothionein-like protein 2A	copper ion binding;cell;cellular copper ion homeostasis;	Q9SU91.1(13.6);	Acyl-[acyl-carrier-protein]--UDP-N-acetylglucosamine O-acyltransferase;Hexapeptide repeat;Trimeric LpxA-like superfamily;UDP N-acetylglucosamine O-acyltransferase, C-terminal;UDP-N-acetylglucosamine O-acyltransferase, C-terminal domain superfamily;	acyl-[acyl-carrier-protein]-UDP-N-acetylglucosamine O-acyltransferase activity;lipid A biosynthetic process;lipid X metabolic process;mitochondrion;
Q29Q81.1	Homologous	112	1.2128	77.3795	0.820514	Q9LVX6.1(86.4);Q9SAD3.1(79.2);Q1G3Y4.1(63.8);F4IWB3.1(31.0);	Cyclin-dependent protein kinase inhibitor SMR6	protein kinase inhibitor activity;nucleus;cell cycle;regulation of DNA endoreduplication;negative regulation of cell cycle;negative regulation of mitotic nuclear division;	O80930.1(33.8);Q9ZV27.1(22.6);	Cyclin-dependent protein kinase inhibitor SMR;	cell cycle;negative regulation of cell cycle;negative regulation of mitotic nuclear division;nucleus;protein kinase inhibitor activity;regulation of DNA endoreduplication;
P82792.1	Homologous	82	11.7685	43.9732	0.811625	Q9FL73.1(47.8);Q2V2Y6.1(45.2);P82764.1(40.2);Q2V4A5.1(38.4);Q3EBU2.1(35.1);P82763.1(34.9);Q2V4L5.1(34.8);Q4VNZ9.2(31.4);	Putative defensin-like protein 70	extracellular region;killing of cells of other organism;defense response to fungus;	Q9SRY6.2(17.0);	Glutathione S-transferase, C-terminal;Glutathione S-transferase, C-terminal domain superfamily;Glutathione S-transferase, C-terminal-like;Glutathione S-transferase, N-terminal;Glutathione S-transferases Phi, C-terminal;Glutathione Transferase family;Thioredoxin-like superfamily;	cytoplasm;cytosol;glutathione binding;glutathione metabolic process;glutathione transferase activity;mitochondrion;toxin catabolic process;
Q8GXV6.1	Homologous	80	38.4908	31.5775	0.808116	Q2V2Y3.1(101.4);Q2V334.1(33.7);Q2V4G6.1(32.0);P82761.1(31.2);P82791.1(30.6);	Defensin-like protein 85	extracellular region;killing of cells of other organism;defense response to fungus;	Q42601.1(13.5);Q8L4B0.1(12.0);	ATP-grasp fold;Carbamoyl-phosphate synthase large chain, methylglyoxal synthase-like domain;Carbamoyl-phosphate synthase large subunit, CPSase domain;Carbamoyl-phosphate synthase, large subunit;Carbamoyl-phosphate synthetase large subunit-like, ATP-binding domain;Carbamoyl-phosphate synthetase, large subunit oligomerisation domain;Carbamoyl-phosphate synthetase, large subunit oligomerisation doma…	'de novo' UMP biosynthetic process;ATP binding;Golgi membrane;arginine biosynthetic process;carbamoyl-phosphate synthase (glutamine-hydrolyzing) activity;carbamoyl-phosphate synthase complex;cell wall organization;cellular response to phosphate starvation;chloroplast;chloroplast stroma;cytoplasm;glutamine metabolic process;integral component of membrane;metal ion binding;nitrogen compound metabol…
Q945L0.1	Homologous	78	13.9709	42.0923	0.807868	Q9SUD3.2(166.3);Q9LPJ2.2(58.8);	Cytochrome c oxidase subunit 6b-2	mitochondrion;plastid;	Q67XC9.1(12.6);	HAD superfamily;HAD-like superfamily;HAD-superfamily hydrolase, subfamily IIB;Trehalose-phosphatase;	chloroplast;response to osmotic stress;response to oxidative stress;response to salt stress;trehalase activity;trehalose biosynthetic process;trehalose-phosphatase activity;
Q2V2Y6.1	Homologous	83	29.7562	34.1711	0.804713	Q3EBU2.1(121.6);Q9FL73.1(74.9);Q2V4L5.1(56.5);P82792.1(44.9);Q2V4C3.1(34.6);	Putative defensin-like protein 66	extracellular region;killing of cells of other organism;defense response to fungus;	Q9SRY6.2(26.9);Q9LT84.2(12.9);	Glutathione S-transferase, C-terminal;Glutathione S-transferase, C-terminal domain superfamily;Glutathione S-transferase, C-terminal-like;Glutathione S-transferase, N-terminal;Glutathione S-transferases Phi, C-terminal;Glutathione Transferase family;Protein of unknown function DUF677;Thioredoxin-like superfamily;	cytoplasm;cytosol;glutathione binding;glutathione metabolic process;glutathione transferase activity;integral component of membrane;mitochondrion;plasma membrane;toxin catabolic process;
P42036.2	Homologous	150	8.26233	47.5667	0.792573	Q9CAX6.1(293.4);Q9SIH0.1(291.1);P56802.1(48.5);	40S ribosomal protein S14-3	ribosomal small subunit assembly;maturation of SSU-rRNA from tricistronic rRNA transcript (SSU-rRNA, 5.8S rRNA, LSU-rRNA);structural constituent of ribosome;cytosol;ribosome;translation;mRNA 5'-UTR binding;small ribosomal subunit rRNA binding;	Q8VZT8.1(46.6);	Ribosomal protein S11;Ribosomal protein S11 superfamily;	karyogamy;mRNA 5'-UTR binding;maturation of SSU-rRNA from tricistronic rRNA transcript (SSU-rRNA, 5.8S rRNA, LSU-rRNA);mitochondrial small ribosomal subunit;polar nucleus fusion;ribosomal small subunit assembly;small ribosomal subunit rRNA binding;structural constituent of ribosome;translation;
Q2V3S0.1	Homologous	77	15.565	40.5597	0.778557	Q2V3R9.1(124.6);Q2V4I8.1(57.6);Q2V3D7.1(47.6);Q56XC2.2(33.4);	Putative defensin-like protein 30	extracellular region;pathogenesis;sodium channel inhibitor activity;killing of cells of other organism;defense response to fungus;	Q940G0.1(10.9);	Nonaspanin (TM9SF);	Golgi apparatus;Golgi cis cisterna;Golgi medial cisterna;Golgi membrane;cis-Golgi network;endosome;endosome membrane;extracellular region;integral component of membrane;membrane;protein localization to membrane;trans-Golgi network;
Q9ZT16.1	Homologous	135	0.972971	83.4874	0.772464	Q8LG54.2(109.5);Q9SJY7.1(66.7);Q9ZT17.1(45.8);Q9M0S4.1(35.5);	Classical arabinogalactan protein 4	plasma membrane;synergid death;anchored component of membrane;	Q9M2D8.1(11.1);	Remorin, C-terminal;Remorin, N-terminal;	cytosol;plasma membrane;plasmodesma;vacuole;
Q9LZP9.1	Homologous	131	16.2945	39.7954	0.757861	O22914.1(159.3);Q9C9K2.1(68.2);	Calvin cycle protein CP12-2, chloroplastic	copper ion binding;cytosol;response to light stimulus;chloroplast;chloroplast stroma;response to sucrose;nickel cation binding;peptide cross-linking via L-cystine;reductive pentose-phosphate cycle;enzyme binding;protein-macromolecule adaptor activity;protein-containing complex;cellular response to heat;protein-containing complex binding;protein-containing complex assembly;cellular response to col…	P25857.2(23.0);	Domain of unknown function CP12;Glyceraldehyde 3-phosphate dehydrogenase, NAD(P) binding domain;Glyceraldehyde 3-phosphate dehydrogenase, active site;Glyceraldehyde 3-phosphate dehydrogenase, catalytic domain;Glyceraldehyde-3-phosphate dehydrogenase, type I;Glyceraldehyde/Erythrose phosphate dehydrogenase family;NAD(P)-binding domain superfamily;	NAD binding;NADP binding;apoplast;chloroplast;chloroplast envelope;chloroplast membrane;chloroplast stroma;chloroplast thylakoid membrane;glucose metabolic process;glyceraldehyde-3-phosphate dehydrogenase (NAD+) (phosphorylating) activity;glyceraldehyde-3-phosphate dehydrogenase (NADP+) (phosphorylating) activity;nucleus;reductive pentose-phosphate cycle;response to cadmium ion;response to cold;r…
Q8S8N1.1	Homologous	86	19.613	37.7674	0.751175	Q8S8N2.2(34.2);Q8S8N3.1(34.2);	CLAVATA3/ESR (CLE)-related protein 7	extracellular space;multicellular organism development;cell-cell signaling involved in cell fate commitment;apoplast;	O64793.3(13.1);	Bulb-type lectin domain;Bulb-type lectin domain superfamily;PAN/Apple domain;Protein kinase domain;Protein kinase-like domain superfamily;S-receptor-like serine/threonine-protein kinase;Serine-threonine/tyrosine-protein kinase, catalytic domain;Serine/threonine-protein kinase, active site;	ATP binding;calmodulin binding;carbohydrate binding;integral component of membrane;plasma membrane;protein serine/threonine kinase activity;
Q941D1.1	Single-copy	149	21.2778	36.3799	0.712892		High mobility group B protein 12	DNA binding;nucleus;polar nucleus fusion;	Q05153.2(17.0);Q9LTT3.1(13.8);	ARID DNA-binding domain;ARID DNA-binding domain superfamily;Domain of unknown function DUF1747;FACT complex subunit POB3-like, N-terminal PH domain;High mobility group box domain;High mobility group box domain superfamily;PH-like domain superfamily;SSRP1 domain;SSRP1 domain superfamily;Structure-specific recognition protein;	DNA binding;DNA repair;DNA replication;DNA-binding transcription factor activity;FACT complex;histone binding;karyogamy;nuclear chromatin;nuclear euchromatin;nucleosome binding;nucleus;polar nucleus fusion;vegetative to reproductive phase transition of meristem;
P82762.1	Homologous	77	21.1085	35.9792	0.68034	Q2V334.1(41.4);Q2V4G9.1(36.2);	Defensin-like protein 91	extracellular region;killing of cells of other organism;defense response to fungus;	Q42601.1(12.6);	ATP-grasp fold;Carbamoyl-phosphate synthase large chain, methylglyoxal synthase-like domain;Carbamoyl-phosphate synthase large subunit, CPSase domain;Carbamoyl-phosphate synthase, large subunit;Carbamoyl-phosphate synthetase large subunit-like, ATP-binding domain;Carbamoyl-phosphate synthetase, large subunit oligomerisation domain;Carbamoyl-phosphate synthetase, large subunit oligomerisation doma…	'de novo' UMP biosynthetic process;ATP binding;arginine biosynthetic process;carbamoyl-phosphate synthase (glutamine-hydrolyzing) activity;carbamoyl-phosphate synthase complex;cellular response to phosphate starvation;chloroplast;chloroplast stroma;cytoplasm;glutamine metabolic process;metal ion binding;nitrogen compound metabolic process;
Q9M0E0.1	Homologous	129	14.2812	39.9729	0.675554	O82205.1(247.3);P42798.2(138.4);O80646.2(135.9);Q9LX88.3(135.4);	40S ribosomal protein S15a-5	structural constituent of ribosome;mitochondrion;vacuole;translation;cytosolic ribosome;cytosolic small ribosomal subunit;polysomal ribosome;	Q8RWL2.2(14.7);	EF-Hand 1, calcium-binding site;EF-hand domain;EF-hand domain pair;Protein kinase domain;Protein kinase, ATP binding site;Protein kinase-like domain superfamily;Serine/threonine-protein kinase, active site;	ATP binding;calcium ion binding;calcium-dependent protein serine/threonine kinase activity;calmodulin binding;cytoplasm;defense response to fungus;intracellular signal transduction;mitochondrion;nucleus;peptidyl-serine phosphorylation;plasma membrane;positive regulation of response to salt stress;protein autophosphorylation;
P82719.1	Homologous	81	13.0306	40.9247	0.674758	P82729.1(69.9);P82747.2(62.6);Q8S8H3.1(55.5);P82716.1(49.9);P82724.2(42.7);P82748.1(36.1);P82718.1(33.6);P82766.1(31.5);	Putative defensin-like protein 148	extracellular region;killing of cells of other organism;defense response to fungus;	Q0WRW8.1(11.9);	Cytochrome b561 and DOMON domain-containing protein;Cytochrome b561/ferric reductase transmembrane;DOMON domain;	integral component of membrane;metal ion binding;oxidation-reduction process;
Q9SUD3.2	Homologous	78	13.9709	39.9885	0.661855	Q945L0.1(166.3);Q9LPJ2.2(60.1);	Cytochrome c oxidase subunit 6b-3	mitochondrion;plasma membrane;	Q67XC9.1(12.6);	HAD superfamily;HAD-like superfamily;HAD-superfamily hydrolase, subfamily IIB;Trehalose-phosphatase;	chloroplast;response to osmotic stress;response to oxidative stress;response to salt stress;trehalase activity;trehalose biosynthetic process;trehalose-phosphatase activity;
Q1G3K7.1	Single-copy	127	19.6126	36.4134	0.659232		PRA1 family protein C	endoplasmic reticulum;endoplasmic reticulum membrane;integral component of membrane;vesicle-mediated transport;	Q9LIC6.1(76.9);Q9FZ63.1(73.4);Q9C889.1(68.6);Q9LIC7.1(67.3);Q9FRR1.1(61.0);Q9FLB6.1(47.4);P93829.1(46.6);O80915.1(45.2);Q9M012.1(41.2);Q9SIY7.1(41.1);	Prenylated rab acceptor PRA1;	Golgi apparatus;Golgi trans cisterna;cytoplasm;cytosol;endoplasmic reticulum;endoplasmic reticulum membrane;endosome;endosome membrane;integral component of membrane;trans-Golgi network;transport of virus in multicellular host;vacuolar membrane;vesicle-mediated transport;
Q8L9S0.1	Homologous	134	2.74041	58.4679	0.657434	Q8VXX9.1(247.2);	Bet1-like protein At1g29060	Golgi cis cisterna;cell;endoplasmic reticulum membrane;Golgi apparatus;protein transport;vesicle-mediated transport;integral component of Golgi membrane;vacuolar sequestering of sodium ion;regulation of response to osmotic stress;positive regulation of response to salt stress;	Q946Y7.1(16.5);	SNARE;Syntaxin 6, N-terminal;Syntaxin/epimorphin, conserved site;Target SNARE coiled-coil homology domain;	Golgi vesicle transport;SNAP receptor activity;SNARE binding;SNARE complex;abscisic acid-activated signaling pathway;endomembrane system;integral component of membrane;intracellular protein transport;late endosome membrane;trans-Golgi network;vesicle docking;vesicle fusion;
Q9FY84.1	Single-copy	146	8.0889	45.7118	0.65521		Probable gamma-secretase subunit PEN-2	Golgi-associated vesicle;Notch signaling pathway;integral component of membrane;gamma-secretase complex;	Q9MAT6.1(10.1);	ARID DNA-binding domain;ARID DNA-binding domain superfamily;High mobility group box domain;High mobility group box domain superfamily;	DNA-binding transcription factor activity;four-way junction DNA binding;glucosinolate metabolic process;nucleus;pollen germination;pollen tube;pollen tube growth;regulation of transcription, DNA-templated;transcription factor binding;transcription regulatory region DNA binding;
Q9M0C2.1	Homologous	123	64.1728	24.196	0.651149	Q9ZV52.2(77.9);	Putative EG45-like domain containing protein 1	extracellular region;cell wall;cellular response to hypoxia;	Q9SHD1.1(34.1);O22874.1(31.2);Q9LZT4.1(28.2);Q9SVE5.1(27.9);Q9LQ07.1(27.8);O23547.2(27.6);Q9M0I2.2(27.2);Q38864.1(26.3);Q9LZT5.1(25.7);Q9LNU3.1(25.3);	Expansin;Expansin, cellulose-binding-like domain;Expansin, cellulose-binding-like domain superfamily;Expansin/Lol pI;Expansin/pollen allergen, DPBB domain;Major pollen allergen Lol pI;RlpA-like domain superfamily;RlpA-like protein, double-psi beta-barrel domain;	Golgi apparatus;cell wall;cell wall organization;cytosol;extracellular region;integral component of membrane;membrane;plant-type cell wall;plant-type cell wall organization;plasmodesma;primary root development;secretory vesicle;sexual reproduction;syncytium formation;unidimensional cell growth;
Q56XC2.2	Homologous	84	16.8122	37.8131	0.646739	Q2V3S0.1(32.0);Q2V3R9.1(30.3);	Defensin-like protein 37	extracellular region;killing of cells of other organism;defense response to fungus;	Q67Y83.2(14.2);	Alpha/Beta hydrolase fold;Peptidase S10, serine carboxypeptidase;Serine carboxypeptidase, serine active site;	extracellular region;proteolysis involved in cellular protein catabolic process;serine-type carboxypeptidase activity;
Q3ECS5.1	Homologous	116	0.801736	83.9293	0.642238	F4IWB3.1(92.7);Q1G3Y4.1(34.8);	Cyclin-dependent protein kinase inhibitor SMR9	protein kinase inhibitor activity;nucleus;cell cycle;regulation of DNA endoreduplication;negative regulation of cell cycle;negative regulation of mitotic nuclear division;	O80930.1(26.2);Q9ZV27.1(12.4);	Cyclin-dependent protein kinase inhibitor SMR;	cell cycle;negative regulation of cell cycle;negative regulation of mitotic nuclear division;nucleus;protein kinase inhibitor activity;regulation of DNA endoreduplication;
Q944J0.1	Single-copy	92	42.9262	28.086	0.639588		Probable signal peptidase complex subunit 1	signal peptidase complex;signal peptide processing;peptidase activity;integral component of endoplasmic reticulum membrane;protein targeting to ER;	Q9M2L4.1(14.4);O22218.1(13.2);	Calcium-transporting P-type ATPase, N-terminal autoinhibitory domain;Cation-transporting P-type ATPase, C-terminal;Cation-transporting P-type ATPase, N-terminal;HAD superfamily;HAD-like superfamily;P-type ATPase;P-type ATPase, A domain superfamily;P-type ATPase, cytoplasmic domain N;P-type ATPase, phosphorylation site;P-type ATPase, subfamily IIB;P-type ATPase, transmembrane domain superfamily;	ATP binding;ATPase-coupled cation transmembrane transporter activity;Golgi apparatus;anion homeostasis;calcium transmembrane transporter activity, phosphorylative mechanism;calmodulin binding;chloroplast;cytosol;defense response to bacterium;integral component of membrane;intracellular membrane-bounded organelle;metal ion binding;negative regulation of programmed cell death;plant-type vacuole;pla…
Q9M0Z5.1	Homologous	139	7.34986	46.4878	0.639207	Q9ZS91.1(263.7);Q8VY86.1(199.0);O49707.1(198.5);Q84JT6.1(196.2);	Peptide methionine sulfoxide reductase B4	cytosol;response to oxidative stress;protein repair;peptide-methionine (R)-S-oxide reductase activity;metal ion binding;	Q9LMJ3.2(13.1);	GDSL lipase/esterase;GDSL lipase/esterase-like, plant;SGNH hydrolase superfamily;	extracellular region;hydrolase activity, acting on ester bonds;lipid catabolic process;
O22914.1	Homologous	124	17.3973	37.2056	0.631234	Q9LZP9.1(159.4);Q9C9K2.1(68.5);	Calvin cycle protein CP12-1, chloroplastic	copper ion binding;cytosol;chloroplast;chloroplast stroma;response to sucrose;chloroplast envelope;nickel cation binding;reductive pentose-phosphate cycle;protein-containing complex;negative regulation of reductive pentose-phosphate cycle;	P25857.2(23.0);	Domain of unknown function CP12;Glyceraldehyde 3-phosphate dehydrogenase, NAD(P) binding domain;Glyceraldehyde 3-phosphate dehydrogenase, active site;Glyceraldehyde 3-phosphate dehydrogenase, catalytic domain;Glyceraldehyde-3-phosphate dehydrogenase, type I;Glyceraldehyde/Erythrose phosphate dehydrogenase family;NAD(P)-binding domain superfamily;	NAD binding;NADP binding;apoplast;chloroplast;chloroplast envelope;chloroplast membrane;chloroplast stroma;chloroplast thylakoid membrane;glucose metabolic process;glyceraldehyde-3-phosphate dehydrogenase (NAD+) (phosphorylating) activity;glyceraldehyde-3-phosphate dehydrogenase (NADP+) (phosphorylating) activity;nucleus;reductive pentose-phosphate cycle;response to cadmium ion;response to cold;r…
A8MRD4.1	Homologous	81	16.0443	37.9346	0.624447	A8MQM2.1(116.4);A8MRK3.1(70.2);A8MRM1.1(58.5);A8MQL7.1(32.8);A7REE5.1(32.2);A8MQ92.1(32.0);	Protein RALF-like 7	hormone activity;cell-cell signaling;calcium-mediated signaling;apoplast;	O80497.1(12.6);	Glycoside hydrolase family 9;Glycoside hydrolase family 9, His active site;Six-hairpin glycosidase superfamily;Six-hairpin glycosidase-like superfamily;	cell wall organization;cellulase activity;cellulose catabolic process;extracellular region;
Q2V3R9.1	Homologous	79	15.4263	38.0278	0.605803	Q2V3S0.1(124.0);Q2V4I8.1(52.8);Q2V3D7.1(42.8);Q56XC2.2(31.2);	Putative defensin-like protein 29	extracellular region;killing of cells of other organism;defense response to fungus;	Q940G0.1(10.9);	Nonaspanin (TM9SF);	Golgi apparatus;Golgi cis cisterna;Golgi medial cisterna;Golgi membrane;cis-Golgi network;endosome;endosome membrane;extracellular region;integral component of membrane;membrane;protein localization to membrane;trans-Golgi network;
P56802.1	Homologous	138	11.1419	41.421	0.604722	P42036.2(49.7);Q9CAX6.1(49.5);Q9SIH0.1(49.4);	30S ribosomal protein S11, chloroplastic	ribosomal small subunit assembly;maturation of SSU-rRNA from tricistronic rRNA transcript (SSU-rRNA, 5.8S rRNA, LSU-rRNA);structural constituent of ribosome;mitochondrial small ribosomal subunit;translation;chloroplast;plastid;chloroplast stroma;mRNA 5'-UTR binding;small ribosomal subunit rRNA binding;	Q8VZT8.1(46.6);	Ribosomal protein S11;Ribosomal protein S11 superfamily;	karyogamy;mRNA 5'-UTR binding;maturation of SSU-rRNA from tricistronic rRNA transcript (SSU-rRNA, 5.8S rRNA, LSU-rRNA);mitochondrial small ribosomal subunit;polar nucleus fusion;ribosomal small subunit assembly;small ribosomal subunit rRNA binding;structural constituent of ribosome;translation;
Q84JT6.1	Homologous	143	6.94481	46.4986	0.604578	Q8VY86.1(243.8);O49707.1(242.7);Q9ZS91.1(208.9);Q9M0Z5.1(196.1);	Peptide methionine sulfoxide reductase B9	cytosol;response to oxidative stress;protein repair;peptide-methionine (R)-S-oxide reductase activity;metal ion binding;	Q9LMJ3.2(13.1);	GDSL lipase/esterase;GDSL lipase/esterase-like, plant;SGNH hydrolase superfamily;	extracellular region;hydrolase activity, acting on ester bonds;lipid catabolic process;
Q9M8X9.1	Homologous	146	12.4693	40.1884	0.602067	Q42340.1(267.2);Q9SK22.1(266.9);	40S ribosomal protein S16-2	maturation of SSU-rRNA from tricistronic rRNA transcript (SSU-rRNA, 5.8S rRNA, LSU-rRNA);RNA binding;structural constituent of ribosome;nucleolus;cytosol;translation;small ribosomal subunit;cytosolic ribosome;cytosolic small ribosomal subunit;polysomal ribosome;	Q8L6Z4.1(19.7);Q9XJ27.1(16.9);	Ribosomal protein S5 domain 2-type fold;Ribosomal protein S5 domain 2-type fold, subgroup;Ribosomal protein S9;Ribosomal protein S9, bacterial/plastid;Ribosomal protein S9, conserved site;	RNA binding;chloroplast;chloroplast envelope;chloroplast stroma;cytosol;embryo sac central cell differentiation;gametophyte development;mitochondrial small ribosomal subunit;mitochondrion;plastid small ribosomal subunit;pollen development;rRNA binding;small ribosomal subunit;structural constituent of ribosome;translation;
P82747.2	Homologous	83	12.6489	39.9602	0.597616	P82719.1(62.8);Q8S8H3.1(54.5);P82729.1(52.8);P82716.1(43.4);P82724.2(39.5);	Putative defensin-like protein 150	extracellular region;killing of cells of other organism;defense response to fungus;	Q0WRW8.1(11.7);	Cytochrome b561 and DOMON domain-containing protein;Cytochrome b561/ferric reductase transmembrane;DOMON domain;	integral component of membrane;metal ion binding;oxidation-reduction process;
Q43284.2	Single-copy	141	41.0908	27.7085	0.589887		Oleosin 14.9 kDa	extracellular region;monolayer-surrounded lipid storage body;integral component of membrane;lipid storage;sexual reproduction;	Q39165.1(82.5);Q42431.1(80.0);Q9LY09.1(48.3);Q9LHD9.1(12.3);	Oleosin;Protein of unknown function DUF677;	cellular response to water deprivation;cytosol;extracellular matrix;extracellular region;extrinsic component of cytoplasmic side of plasma membrane;extrinsic component of endosome membrane;integral component of membrane;lipid binding;lipid storage;mRNA binding;monolayer-surrounded lipid storage body;pollen coat;pollen hydration;recognition of pollen;response to freezing;seed germination;seed oilb…
Q5PP12.1	Single-copy	69	19.7131	35.1812	0.588083		Arabinogalactan protein 24	plasma membrane;anchored component of membrane;	Q38954.1(13.7);	Phosphate transporter;	chloroplast;chloroplast envelope;chloroplast inner membrane;cytosol;inorganic phosphate transmembrane transporter activity;integral component of plasma membrane;low-affinity phosphate transmembrane transporter activity;phosphate ion transmembrane transport;phosphate ion transport;symporter activity;
Q1G3V9.1	Homologous	99	7.9331	44.6838	0.584441	Q2V3I3.1(30.0);	EPIDERMAL PATTERNING FACTOR-like protein 8	extracellular region;guard cell differentiation;stomatal complex development;	Q1PEY6.1(74.0);Q5XEN5.1(13.4);C4B8C5.1(12.4);	DNA-binding domain superfamily;EPIDERMAL PATTERNING FACTOR-like protein;Methyl-CpG DNA binding;Zinc finger, CW-type;	DNA demethylation;extracellular region;guard cell differentiation;methyl-CpG binding;nucleus;stomatal complex development;zinc ion binding;
Q8VXX9.1	Homologous	137	2.45147	58.2117	0.576739	Q8L9S0.1(247.3);	Bet1-like protein At4g14600	endoplasmic reticulum membrane;plasma membrane;protein transport;vesicle-mediated transport;integral component of Golgi membrane;	Q946Y7.1(16.5);	SNARE;Syntaxin 6, N-terminal;Syntaxin/epimorphin, conserved site;Target SNARE coiled-coil homology domain;	Golgi vesicle transport;SNAP receptor activity;SNARE binding;SNARE complex;abscisic acid-activated signaling pathway;endomembrane system;integral component of membrane;intracellular protein transport;late endosome membrane;trans-Golgi network;vesicle docking;vesicle fusion;
P82637.1	Homologous	97	16.2383	36.8403	0.568787	P82636.1(156.9);P82638.1(149.6);P82640.2(38.3);P82639.1(37.0);P82647.2(35.5);	Putative defensin-like protein 240	extracellular region;signal transduction;killing of cells of other organism;defense response to fungus;	Q9LXE8.1(12.4);	DYW domain;Pentatricopeptide repeat;Tetratricopeptide-like helical domain superfamily;	RNA modification;intracellular membrane-bounded organelle;mitochondrion;zinc ion binding;
Q9S760.1	Homologous	135	27.2031	31.3556	0.558853	Q9FED2.1(187.8);	HVA22-like protein d	response to cold;response to water deprivation;pollen development;response to abscisic acid;flower development;negative regulation of autophagy;integral component of membrane;hyperosmotic salinity response;	Q9S7V4.1(117.2);Q9S784.1(102.1);Q6NLY8.1(56.8);Q9LR09.2(43.5);Q8LEM6.2(41.3);Q8LE10.2(38.9);Q8GXE9.2(31.6);	TB2/DP1/HVA22-related protein;	hyperosmotic salinity response;integral component of membrane;plasmodesma;response to abscisic acid;response to cold;response to water deprivation;
Q9ZS91.1	Homologous	139	7.34986	44.9971	0.557399	Q9M0Z5.1(263.7);Q8VY86.1(211.5);O49707.1(211.3);Q84JT6.1(209.0);	Peptide methionine sulfoxide reductase B5	cytosol;response to oxidative stress;protein repair;peptide-methionine (R)-S-oxide reductase activity;metal ion binding;	Q9LMJ3.2(13.1);	GDSL lipase/esterase;GDSL lipase/esterase-like, plant;SGNH hydrolase superfamily;	extracellular region;hydrolase activity, acting on ester bonds;lipid catabolic process;
Q9FHX8.1	Single-copy	92	3.53953	53.187	0.555432		Mediator-associated protein 3	transcription coactivator activity;nucleus;transcription regulator complex;mediator complex;positive regulation of transcription initiation from RNA polymerase II promoter;	O65155.1(36.6);	DEK, C-terminal;Putative RNA polymerase II transcriptional coactivator KELP;Transcriptional coactivator p15 (PC4);ssDNA-binding transcriptional regulator;	DNA binding;nucleus;positive regulation of transcription initiation from RNA polymerase II promoter;transcription coactivator activity;transcription regulator complex;
Q2V4N2.1	Single-copy	78	16.1545	36.2064	0.532241		Defensin-like protein 201	extracellular region;killing of cells of other organism;defense response to fungus;	Q9LIS1.1(13.7);	Chloramphenicol acetyltransferase-like domain superfamily;Transferase;	cell wall organization;chloroplast thylakoid membrane;pollen development;transferase activity, transferring acyl groups other than amino-acyl groups;very long-chain fatty acid biosynthetic process;
B3H469.1	Homologous	127	8.80647	41.7213	0.491721	Q9M0U1.1(192.8);	Putative B3 domain-containing protein At4g12617	DNA binding;nucleus;	Q9C6M5.1(13.5);	AP2/ERF domain;AP2/ERF domain superfamily;B3 DNA binding domain;DNA-binding domain superfamily;DNA-binding pseudobarrel domain superfamily;	DNA-binding transcription factor activity;cellular response to hypoxia;ethylene-activated signaling pathway;nucleus;photoperiodism, flowering;transcription regulatory region DNA binding;
Q941C7.1	Homologous	75	15.688	35.5253	0.483888	Q8LE92.1(50.2);	Protein PSY1	extracellular region;growth factor activity;chloroplast organization;regulation of cell population proliferation;	Q9SIW1.1(11.9);	Homeobox KN domain;Homeobox domain;Homeobox-like domain superfamily;POX domain;	DNA-binding transcription factor activity;nucleus;transcription regulatory region DNA binding;
Q9LX88.3	Homologous	130	14.1907	36.4878	0.480427	P42798.2(261.1);O80646.2(240.8);Q9M0E0.1(135.5);O82205.1(130.4);	40S ribosomal protein S15a-4	structural constituent of ribosome;cytosol;translation;cytosolic ribosome;cytosolic small ribosomal subunit;polysomal ribosome;	Q8RWL2.2(14.7);	EF-Hand 1, calcium-binding site;EF-hand domain;EF-hand domain pair;Protein kinase domain;Protein kinase, ATP binding site;Protein kinase-like domain superfamily;Serine/threonine-protein kinase, active site;	ATP binding;calcium ion binding;calcium-dependent protein serine/threonine kinase activity;calmodulin binding;cytoplasm;defense response to fungus;intracellular signal transduction;mitochondrion;nucleus;peptidyl-serine phosphorylation;plasma membrane;positive regulation of response to salt stress;protein autophosphorylation;
P59259.2	Single-copy	103	5.99331	45.3505	0.469588		Histone H4	nucleosome;DNA binding;extracellular region;nucleolus;vacuole;vacuolar membrane;peroxisome;cytosol;plasma membrane;nucleosome assembly;response to water deprivation;plasmodesma;chloroplast;plastid;thylakoid;protein heterodimerization activity;	Q9FI55.1(13.3);	CENP-S/Mhf1;Histone-fold;	DNA binding;FANCM-MHF complex;Fanconi anaemia nuclear complex;chromatin binding;interstrand cross-link repair;mitotic recombination;protein heterodimerization activity;reciprocal meiotic recombination;replication fork processing;resolution of meiotic recombination intermediates;synapsis;
O82499.2	Single-copy	141	8.8542	40.9362	0.458992		Translation initiation factor IF-1, chloroplastic	translation initiation factor activity;cytosol;chloroplast;ribosome binding;	Q9SK87.1(15.0);	Alcohol dehydrogenase, C-terminal;Alcohol dehydrogenase, N-terminal;Alcohol dehydrogenase, zinc-type, conserved site;GroES-like superfamily;NAD(P)-binding domain superfamily;	S-(hydroxymethyl)glutathione dehydrogenase activity;alcohol dehydrogenase activity, zinc-dependent;cytosol;formaldehyde catabolic process;zinc ion binding;
Q9SIN5.1	Homologous	141	24.1049	30.5305	0.45673	Q42512.1(184.0);	Protein COLD-REGULATED 15B, chloroplastic	galactose binding;cytosol;lipid binding;response to cold;chloroplast;chloroplast stroma;cold acclimation;response to abscisic acid;chloroplast envelope;leaf senescence;defense response to fungus;	Q9SKP0.1(19.7);Q9LF88.1(12.9);	Late embryogenesis abundant protein, LEA_4 subgroup;	cytosol;floral organ abscission;
P42798.2	Homologous	130	14.1907	35.8347	0.451019	Q9LX88.3(261.0);O80646.2(242.8);Q9M0E0.1(138.5);O82205.1(133.4);	40S ribosomal protein S15a-1	structural constituent of ribosome;cell wall;vacuolar membrane;cytosol;plasma membrane;translation;plasmodesma;cytosolic ribosome;cytosolic small ribosomal subunit;polysomal ribosome;	Q8RWL2.2(14.7);	EF-Hand 1, calcium-binding site;EF-hand domain;EF-hand domain pair;Protein kinase domain;Protein kinase, ATP binding site;Protein kinase-like domain superfamily;Serine/threonine-protein kinase, active site;	ATP binding;calcium ion binding;calcium-dependent protein serine/threonine kinase activity;calmodulin binding;cytoplasm;defense response to fungus;intracellular signal transduction;mitochondrion;nucleus;peptidyl-serine phosphorylation;plasma membrane;positive regulation of response to salt stress;protein autophosphorylation;
Q9SJU8.1	Homologous	98	7.76486	41.9469	0.442893	O80439.1(35.8);	30S ribosomal protein S31, mitochondrial	mitochondrion;ribosome;plastid;plastid translation;	Q9SAI5.1(15.7);	Ribosomal protein L30, N-terminal;Ribosomal protein L30, central domain, archaeal type;Ribosomal protein L30, ferredoxin-like fold domain;Ribosomal protein L30, ferredoxin-like fold domain superfamily;Ribosomal protein L7, eukaryotic;Ribosomal protein L7, eukaryotic/archaeal;Ribosomal protein L7/L30;	RNA binding;cytosol;cytosolic large ribosomal subunit;maturation of LSU-rRNA from tricistronic rRNA transcript (SSU-rRNA, 5.8S rRNA, LSU-rRNA);nucleolus;structural constituent of ribosome;
Q9LUH9.1	Homologous	107	2.76303	53.3103	0.438109	Q2V3I3.1(125.2);C4B8C4.1(38.3);Q9T068.1(33.7);Q8S8I4.1(32.5);	EPIDERMAL PATTERNING FACTOR-like protein 5	extracellular region;guard cell differentiation;stomatal complex development;	Q1PEY6.1(86.7);C4B8C5.1(31.0);	EPIDERMAL PATTERNING FACTOR-like protein;	extracellular region;guard cell differentiation;stomatal complex development;
Q9LJU6.1	Homologous	119	32.3229	27.1186	0.437795	Q9C6T7.1(186.7);O64847.1(47.0);	Protein FATTY ACID EXPORT 6	nucleus;cytoplasm;endomembrane system;membrane;integral component of membrane;	Q94A32.1(101.0);Q93V66.1(63.0);Q8LPG1.1(37.5);Q9ZVH7.2(30.6);	TMEM14 family;	Golgi apparatus;chloroplast;chloroplast envelope;chloroplast inner membrane;chloroplast membrane;cytosol;fatty acid transmembrane transport;fatty acid transmembrane transporter activity;fatty acid transport;integral component of membrane;lipid homeostasis;membrane;mitochondrion;plant-type cell wall assembly;plastid;pollen wall assembly;
Q9FIC3.1	Single-copy	93	6.52946	43.5043	0.431046		Protein BOLA2	nucleus;cytoplasm;cytosol;plasma membrane;response to oxidative stress;response to iron ion;	Q682I1.1(29.7);Q9LF68.1(24.5);	BolA protein;BolA-like superfamily;	2 iron, 2 sulfur cluster binding;chloroplast;metal ion binding;mitochondrion;plastid;
Q0WMV8.1	Homologous	110	10.4873	38.4246	0.427834	P0DI19.1(240.0);	PHD finger-like domain-containing protein 5B	mRNA splicing, via spliceosome;	O64862.2(13.5);	Cytoplasmic tRNA 2-thiolation protein 1;Cytoplasmic tRNA 2-thiolation protein 1, C-terminal;Rossmann-like alpha/beta/alpha sandwich fold;tRNA thiolation protein, TtcA/Ctu1 type;tRNA(Ile)-lysidine/2-thiocytidine synthase, N-terminal;	cytosolic tRNA wobble base thiouridylase complex;nucleotidyltransferase activity;protein urmylation;tRNA binding;tRNA wobble position uridine thiolation;
P0DI19.1	Homologous	110	10.4873	38.4246	0.427834	Q0WMV8.1(240.0);	PHD finger-like domain-containing protein 5A	mRNA splicing, via spliceosome;	O64862.2(13.5);	Cytoplasmic tRNA 2-thiolation protein 1;Cytoplasmic tRNA 2-thiolation protein 1, C-terminal;Rossmann-like alpha/beta/alpha sandwich fold;tRNA thiolation protein, TtcA/Ctu1 type;tRNA(Ile)-lysidine/2-thiocytidine synthase, N-terminal;	cytosolic tRNA wobble base thiouridylase complex;nucleotidyltransferase activity;protein urmylation;tRNA binding;tRNA wobble position uridine thiolation;
P34893.1	Single-copy	98	22.8695	30.3908	0.427422		10 kDa chaperonin, mitochondrial	copper ion binding;ATP binding;extracellular region;mitochondrion;mitochondrial matrix;cytosol;response to heat;metal ion binding;unfolded protein binding;chaperone cofactor-dependent protein refolding;chaperone binding;	O65282.2(84.4);	Chaperonin Cpn20;Chaperonin GroES, conserved site;GroES chaperonin family;GroES chaperonin superfamily;GroES-like superfamily;	ATP binding;apoplast;chaperone binding;chaperone cofactor-dependent protein refolding;chloroplast;chloroplast envelope;chloroplast stroma;chloroplast thylakoid membrane;copper ion binding;metal ion binding;mitochondrial matrix;mitochondrion;negative regulation of abscisic acid-activated signaling pathway;plastid;positive regulation of superoxide dismutase activity;protein heterotetramerization;re…
P0CAX9.1	Homologous	94	9.2501	39.3436	0.412065	Q2V2S1.1(168.2);Q2V391.1(37.2);Q2V392.1(35.0);	Defensin-like protein 21	extracellular region;killing of cells of other organism;defense response to fungus;	Q9FMY5.1(12.8);	Nucleotide-binding alpha-beta plait domain superfamily;RNA recognition motif domain;RNA recognition motif domain, eukaryote;RNA-binding domain superfamily;U2 auxiliary factor small subunit;Zinc finger, CCCH-type;	DNA binding;U2AF;mRNA splicing, via spliceosome;metal ion binding;nuclear speck;nucleus;photoperiodism, flowering;pre-mRNA 3'-splice site binding;spliceosomal complex;
Q9SIW5.3	Homologous	109	9.11138	39.4972	0.411885	Q8GYL5.2(195.5);Q9T029.1(191.1);Q9SIK2.1(190.3);	40S ribosomal protein S25-1	ribosome;	Q9C7T4.1(13.2);	ACT domain;Helix-loop-helix DNA-binding domain superfamily;Myc-type, basic helix-loop-helix (bHLH) domain;	DNA binding;DNA-binding transcription factor activity;nucleus;protein dimerization activity;
Q9LVX6.1	Homologous	99	3.15796	50.8889	0.406922	Q29Q81.1(85.2);Q9SAD3.1(51.8);Q1G3Y4.1(37.6);	Cyclin-dependent protein kinase inhibitor SMR7	protein kinase inhibitor activity;nucleus;cellular response to DNA damage stimulus;cell cycle;regulation of DNA endoreduplication;negative regulation of cell cycle;negative regulation of mitotic nuclear division;	O80930.1(32.3);Q9ZV27.1(24.2);	Cyclin-dependent protein kinase inhibitor SMR;	cell cycle;negative regulation of cell cycle;negative regulation of mitotic nuclear division;nucleus;protein kinase inhibitor activity;regulation of DNA endoreduplication;
O82201.1	Homologous	143	22.5999	29.9993	0.406459	Q84WL9.1(121.5);	AP-4 complex subunit sigma	trans-Golgi network;clathrin-coated pit;protein transport;vesicle-mediated transport;AP-4 adaptor complex;intracellular membrane-bounded organelle;	O22715.1(17.6);Q9SAC9.1(17.4);	AP complex, mu/sigma subunit;AP-2 complex subunit mu, C-terminal superfamily;Clathrin adaptor, mu subunit;Clathrin adaptor, mu subunit, conserved site;Longin-like domain superfamily;Mu homology domain;	Golgi apparatus;clathrin adaptor complex;clathrin-coated vesicle membrane;cytosol;early endosome membrane;intracellular protein transport;nucleus;vesicle-mediated transport;
Q41906.2	Homologous	125	6.74289	42.5328	0.406409	Q945Q1.2(89.9);Q41916.2(54.4);Q84WT8.2(50.9);Q8L5T9.2(44.8);	Cysteine proteinase inhibitor 3	cysteine-type endopeptidase inhibitor activity;extracellular region;defense response;hyperosmotic response;response to oxidative stress;response to cold;response to water deprivation;	Q9SIU9.1(18.5);	Protein MS5;
Q9SLF7.1	Homologous	115	6.15647	43.4913	0.405929	P51407.2(195.2);Q9LXM8.1(134.6);Q9LUK2.1(96.3);Q9LH85.1(92.7);O23095.2(44.9);Q8LEQ0.2(43.1);Q8LCW9.2(41.8);Q9LVC9.1(30.7);	60S acidic ribosomal protein P2-2	structural constituent of ribosome;nucleus;nucleolus;peroxisome;cytosol;plasma membrane;translational elongation;response to cold;chloroplast;cytosolic ribosome;polysomal ribosome;secretory vesicle;	Q9SKZ1.2(10.0);	Purine-rich element binding protein family;	DNA-binding transcription repressor activity, RNA polymerase II-specific;RNA polymerase II regulatory region sequence-specific DNA binding;cytoplasm;double-stranded DNA binding;mRNA binding;nucleus;peroxisome;purine-rich negative regulatory element binding;response to cadmium ion;sequence-specific DNA binding;
Q93V47.1	Homologous	100	8.79478	39.542	0.399276	Q9FDX9.1(89.1);	Guanine nucleotide-binding protein subunit gamma 2	heterotrimeric G-protein complex;plasma membrane;G protein-coupled receptor signaling pathway;seed germination;basipetal auxin transport;protein prenylation;protein palmitoylation;lateral root development;	P42774.2(10.9);	Basic-leucine zipper domain;G-box binding protein, multifunctional mosaic region;	DNA-binding transcription factor activity;cytoplasm;nucleus;regulation of transcription, DNA-templated;sequence-specific DNA binding;transcription regulatory region DNA binding;
P82638.1	Homologous	98	17.6896	32.2735	0.397561	P82637.1(149.7);P82636.1(135.1);P82640.2(36.0);P82639.1(33.6);	Defensin-like protein 241	extracellular region;signal transduction;killing of cells of other organism;defense response to fungus;	Q9LXE8.1(13.8);	DYW domain;Pentatricopeptide repeat;Tetratricopeptide-like helical domain superfamily;	RNA modification;intracellular membrane-bounded organelle;mitochondrion;zinc ion binding;
O64818.1	Single-copy	78	12.1516	36.1	0.396256		Uncharacterized protein At2g23090		Q9LZR5.2(13.2);	Nucleoplasmin-like domain;Zinc finger C2H2-type;	chromatin organization;hydrolase activity;metal ion binding;negative regulation of transcription, DNA-templated;nucleolus;plasma membrane;response to abscisic acid;response to salt stress;response to water deprivation;seed dormancy process;transcription regulatory region DNA binding;
Q8GYL5.2	Homologous	108	9.23311	38.8852	0.393664	Q9T029.1(201.8);Q9SIK2.1(201.1);Q9SIW5.3(195.7);	40S ribosomal protein S25-3	structural constituent of ribosome;plasma membrane;cytosolic small ribosomal subunit;	Q9C7T4.1(13.2);	ACT domain;Helix-loop-helix DNA-binding domain superfamily;Myc-type, basic helix-loop-helix (bHLH) domain;	DNA binding;DNA-binding transcription factor activity;nucleus;protein dimerization activity;
Q9SL15.1	Homologous	145	17.4439	32.1855	0.388683	Q9ZSJ6.2(118.5);	Glycine-rich protein 3	extracellular region;mitochondrion;regulation of cell size;response to desiccation;response to ethylene;response to abscisic acid;response to salicylic acid;unidimensional cell growth;response to aluminum ion;root development;	Q8VZT0.1(15.6);O80770.2(12.7);	H/ACA RNP complex subunit Gar1/Naf1, Cbf5-binding domain;H/ACA ribonucleoprotein complex, subunit Gar1/Naf1;KOW;NGN domain;NGN domain, eukaryotic;NusG, N-terminal;NusG, N-terminal domain superfamily;Ribosomal protein L2, domain 2;Ribosomal protein L24/L26, conserved site;Spt5 transcription elongation factor, N-terminal;Spt5, KOW domain repeat 1;Spt5, KOW domain repeat 2;Spt5, KOW domain repeat 3;…	DSIF complex;box H/ACA snoRNA binding;box H/ACA snoRNP complex;chloroplast thylakoid membrane;mRNA binding;nucleolus;regulation of DNA-templated transcription, elongation;regulation of transcription by RNA polymerase II;ribosome;snoRNA guided rRNA pseudouridine synthesis;structural constituent of ribosome;transcription elongation from RNA polymerase II promoter;translation;
O80439.1	Homologous	118	4.68	45.8407	0.3836	Q9SJU8.1(36.1);	30S ribosomal protein S31, chloroplastic	endoplasmic reticulum;ribosome;chloroplast;plastid;chloroplast stroma;chloroplast envelope;plastid translation;	Q9SAI5.1(15.7);	Ribosomal protein L30, N-terminal;Ribosomal protein L30, central domain, archaeal type;Ribosomal protein L30, ferredoxin-like fold domain;Ribosomal protein L30, ferredoxin-like fold domain superfamily;Ribosomal protein L7, eukaryotic;Ribosomal protein L7, eukaryotic/archaeal;Ribosomal protein L7/L30;	RNA binding;cytosol;cytosolic large ribosomal subunit;maturation of LSU-rRNA from tricistronic rRNA transcript (SSU-rRNA, 5.8S rRNA, LSU-rRNA);nucleolus;structural constituent of ribosome;
O80646.2	Homologous	130	14.1907	33.9147	0.374307	P42798.2(242.6);Q9LX88.3(240.5);Q9M0E0.1(135.9);O82205.1(130.4);	40S ribosomal protein S15a-3	structural constituent of ribosome;ribosome;translation;	Q8RWL2.2(14.7);	EF-Hand 1, calcium-binding site;EF-hand domain;EF-hand domain pair;Protein kinase domain;Protein kinase, ATP binding site;Protein kinase-like domain superfamily;Serine/threonine-protein kinase, active site;	ATP binding;calcium ion binding;calcium-dependent protein serine/threonine kinase activity;calmodulin binding;cytoplasm;defense response to fungus;intracellular signal transduction;mitochondrion;nucleus;peptidyl-serine phosphorylation;plasma membrane;positive regulation of response to salt stress;protein autophosphorylation;
Q9LZ60.1	Homologous	115	1.01479	64.2904	0.366355	Q9LZ78.1(34.7);Q9SGE2.1(34.3);	Cyclin-dependent protein kinase inhibitor SMR3	protein kinase inhibitor activity;nucleus;cell cycle;regulation of DNA endoreduplication;negative regulation of cell cycle;negative regulation of mitotic nuclear division;	Q9ZV27.1(41.2);O80930.1(31.2);	Cyclin-dependent protein kinase inhibitor SMR;	cell cycle;negative regulation of cell cycle;negative regulation of mitotic nuclear division;nucleus;protein kinase inhibitor activity;regulation of DNA endoreduplication;
Q2V467.1	Homologous	93	17.8701	31.3141	0.36563	Q2V468.1(88.9);Q2V466.1(55.8);	Putative defensin-like protein 190	extracellular region;killing of cells of other organism;defense response to fungus;	Q8L7D2.1(12.6);	Cucumisin-like catalytic domain;Peptidase S8 propeptide/proteinase inhibitor I9;Peptidase S8 propeptide/proteinase inhibitor I9 superfamily;Peptidase S8, subtilisin, Ser-active site;Peptidase S8, subtilisin-related;Peptidase S8/S53 domain;Peptidase S8/S53 domain superfamily;Subtilisin-like protease, fibronectin type-III domain;	cytoplasm;extracellular region;nucleus;response to jasmonic acid;serine-type endopeptidase activity;
Q9FDX9.1	Homologous	98	9.00608	38.3235	0.363857	Q93V47.1(89.7);	Guanine nucleotide-binding protein subunit gamma 1	Golgi membrane;GTP binding;cytoplasm;Golgi apparatus;heterotrimeric G-protein complex;plasma membrane;G protein-coupled receptor signaling pathway;defense response to fungus, incompatible interaction;seed germination;acropetal auxin transport;protein prenylation;protein palmitoylation;lateral root development;	P42774.2(10.9);	Basic-leucine zipper domain;G-box binding protein, multifunctional mosaic region;	DNA-binding transcription factor activity;cytoplasm;nucleus;regulation of transcription, DNA-templated;sequence-specific DNA binding;transcription regulatory region DNA binding;
Q9SL42.1	Single-copy	119	8.86972	37.9563	0.345933		Peptidyl-prolyl cis-trans isomerase Pin1	peptidyl-prolyl cis-trans isomerase activity;nucleus;mitochondrion;endoplasmic reticulum;cytosol;plasma membrane;plasmodesma;gravitropism;regulation of flower development;regulation of protein localization;regulation of cell cycle;	Q93WI0.1(19.8);	Peptidyl-prolyl cis-trans isomerase, PpiC-type;Rhodanese-like domain;Rhodanese-like domain superfamily;	chloroplast;peptidyl-prolyl cis-trans isomerase activity;
P82636.1	Homologous	98	16.1647	31.6408	0.34149	P82637.1(157.2);P82638.1(134.6);P82640.2(36.1);P82647.2(32.5);P82639.1(31.4);	Putative defensin-like protein 239	extracellular region;signal transduction;killing of cells of other organism;defense response to fungus;	Q9LXE8.1(12.4);	DYW domain;Pentatricopeptide repeat;Tetratricopeptide-like helical domain superfamily;	RNA modification;intracellular membrane-bounded organelle;mitochondrion;zinc ion binding;
O49707.1	Homologous	143	6.94481	40.1685	0.334692	Q8VY86.1(296.5);Q84JT6.1(243.0);Q9ZS91.1(211.8);Q9M0Z5.1(199.0);	Peptide methionine sulfoxide reductase B8	cytosol;response to oxidative stress;protein repair;peptide-methionine (R)-S-oxide reductase activity;metal ion binding;	Q9LMJ3.2(13.1);	GDSL lipase/esterase;GDSL lipase/esterase-like, plant;SGNH hydrolase superfamily;	extracellular region;hydrolase activity, acting on ester bonds;lipid catabolic process;
Q9LN05.1	Single-copy	125	1.55771	56.7648	0.327482		Cyclin-dependent protein kinase inhibitor SMR16	protein kinase inhibitor activity;cell cycle;	Q941D5.1(12.7);	Snf7 family;	ESCRT III complex;endosome transport via multivesicular body sorting pathway;late endosome to vacuole transport;multivesicular body;protein transport;
Q8VY86.1	Homologous	144	6.84455	39.959	0.323344	O49707.1(296.9);Q84JT6.1(244.3);Q9ZS91.1(212.0);Q9M0Z5.1(199.5);	Peptide methionine sulfoxide reductase B7	response to singlet oxygen;cytosol;protein repair;peptide-methionine (R)-S-oxide reductase activity;metal ion binding;	Q9LMJ3.2(13.1);	GDSL lipase/esterase;GDSL lipase/esterase-like, plant;SGNH hydrolase superfamily;	extracellular region;hydrolase activity, acting on ester bonds;lipid catabolic process;
Q6ID76.1	Homologous	110	9.82551	35.6009	0.30529	Q6DSU1.1(78.9);	Root meristem growth factor 3	extracellular space;growth factor activity;positive regulation of cell population proliferation;regulation of root meristem growth;positive regulation of gene expression;cell differentiation;	Q9FL16.1(14.3);	Haem peroxidase;Haem peroxidase superfamily;Peroxidase, active site;Peroxidases heam-ligand binding site;Plant peroxidase;Secretory peroxidase;	extracellular region;heme binding;hydrogen peroxide catabolic process;metal ion binding;peroxidase activity;response to oxidative stress;
Q8GYU0.1	Homologous	111	18.8995	28.7631	0.30101	Q1G3Y0.1(31.6);	CRIB domain-containing protein RIC2	plasma membrane;pollen tube growth;regulation of growth;	Q9CAX8.1(22.8);	CRIB domain;CRIB domain superfamily;Rho GTPase activation protein;Rho GTPase-activating protein domain;	GTPase activator activity;response to anoxia;signal transduction;
Q9T029.1	Homologous	108	9.23311	35.9722	0.297387	Q9SIK2.1(205.5);Q8GYL5.2(201.9);Q9SIW5.3(191.5);	40S ribosomal protein S25-4	structural constituent of ribosome;plasma membrane;cytosolic ribosome;cytosolic small ribosomal subunit;	Q9C7T4.1(13.2);	ACT domain;Helix-loop-helix DNA-binding domain superfamily;Myc-type, basic helix-loop-helix (bHLH) domain;	DNA binding;DNA-binding transcription factor activity;nucleus;protein dimerization activity;
Q3EBU2.1	Homologous	83	15.1408	30.8277	0.295367	Q2V2Y6.1(123.9);Q9FL73.1(64.3);Q2V4L5.1(56.6);P82792.1(36.6);	Putative defensin-like protein 67	extracellular region;killing of cells of other organism;defense response to fungus;	Q9SRY6.2(25.3);	Glutathione S-transferase, C-terminal;Glutathione S-transferase, C-terminal domain superfamily;Glutathione S-transferase, C-terminal-like;Glutathione S-transferase, N-terminal;Glutathione S-transferases Phi, C-terminal;Glutathione Transferase family;Thioredoxin-like superfamily;	cytoplasm;cytosol;glutathione binding;glutathione metabolic process;glutathione transferase activity;mitochondrion;toxin catabolic process;
Q94BS8.1	Homologous	119	15.1162	30.6798	0.290641	Q570U6.1(195.9);Q8S8F5.1(128.1);O04211.1(66.6);O80877.1(55.5);	Protein ELF4-LIKE 2	nucleus;photoperiodism;entrainment of circadian clock;positive regulation of circadian rhythm;protein homodimerization activity;rhythmic process;	Q93VH6.1(13.6);Q9C615.1(12.7);Q9MAL9.1(12.1);	Late embryogenesis abundant protein, LEA_2 subgroup;SNARE;SS18 family;Syntaxin, N-terminal domain;Target SNARE coiled-coil homology domain;	SNAP receptor activity;SNARE binding;SNARE complex;cell division;cell population proliferation;endomembrane system;integral component of membrane;intracellular protein transport;leaf development;nucleus;positive regulation of transcription by RNA polymerase II;positive regulation of transcription, DNA-templated;transcription coactivator activity;vesicle docking;vesicle fusion;
P82749.1	Homologous	85	15.607	30.1188	0.284004	P82717.2(38.6);P82729.1(35.4);P82716.1(34.2);Q8S8H3.1(32.8);Q2V3K0.1(31.1);Q8S8H9.1(30.2);P82748.1(30.1);	Putative defensin-like protein 142	extracellular region;killing of cells of other organism;defense response to fungus;	Q8GXA1.3(11.6);	Invertase/pectin methylesterase inhibitor domain superfamily;Pectin lyase fold;Pectin lyase fold/virulence factor;Pectinesterase inhibitor domain;Pectinesterase, Asp active site;Pectinesterase, Tyr active site;Pectinesterase, catalytic;	aspartyl esterase activity;cell wall;cell wall modification;extracellular region;pectin catabolic process;pectinesterase activity;pectinesterase inhibitor activity;pollen tube;
Q9C6T7.1	Homologous	119	32.3229	22.5547	0.278757	Q9LJU6.1(186.0);O64847.1(51.2);	Protein FATTY ACID EXPORT 5	membrane;integral component of membrane;cellular response to hypoxia;	Q94A32.1(101.0);Q93V66.1(63.0);Q8LPG1.1(37.5);Q9ZVH7.2(30.6);	TMEM14 family;	Golgi apparatus;chloroplast;chloroplast envelope;chloroplast inner membrane;chloroplast membrane;cytosol;fatty acid transmembrane transport;fatty acid transmembrane transporter activity;fatty acid transport;integral component of membrane;lipid homeostasis;membrane;mitochondrion;plant-type cell wall assembly;plastid;pollen wall assembly;
Q2V3E2.1	Homologous	105	38.3972	20.7648	0.277264	Q9T096.2(108.0);Q9C777.1(82.9);Q9SR97.2(82.5);Q9FN32.1(79.3);Q9LY56.1(71.9);	Protein yippee-like At4g27740	plasma membrane;metal ion binding;	Q7PC83.1(15.5);Q9C8P0.1(12.8);	2-oxo acid dehydrogenase, lipoyl-binding site;2-oxoacid dehydrogenase acyltransferase, catalytic domain;AAA+ ATPase domain;ABC transporter-like;ABC-2 type transporter;ABC-transporter N-terminal domain;ATP-binding cassette transporter, PDR-like subfamily G, domain 2;Biotin/lipoyl attachment;Chloramphenicol acetyltransferase-like domain superfamily;E3-binding domain superfamily;P-loop containing nu…	ATP binding;ATPase activity;ATPase-coupled transmembrane transporter activity;chloroplast;chloroplast envelope;chloroplast stroma;cytosolic ribosome;dihydrolipoyllysine-residue acetyltransferase activity;glycolytic process;integral component of membrane;nucleus;plasma membrane;protein domain specific binding;transmembrane transport;
Q9SIK2.1	Homologous	108	9.23311	35.1861	0.275576	Q9T029.1(205.5);Q8GYL5.2(201.1);Q9SIW5.3(190.7);	40S ribosomal protein S25-2	structural constituent of ribosome;vacuole;vacuolar membrane;plasmodesma;cytosolic ribosome;cytosolic small ribosomal subunit;polysomal ribosome;	Q9C7T4.1(13.2);	ACT domain;Helix-loop-helix DNA-binding domain superfamily;Myc-type, basic helix-loop-helix (bHLH) domain;	DNA binding;DNA-binding transcription factor activity;nucleus;protein dimerization activity;
Q2V466.1	Homologous	82	18.62	27.922	0.272985	Q2V468.1(63.9);Q2V467.1(55.3);	Putative defensin-like protein 191	extracellular region;killing of cells of other organism;defense response to fungus;	Q8L7D2.1(12.6);	Cucumisin-like catalytic domain;Peptidase S8 propeptide/proteinase inhibitor I9;Peptidase S8 propeptide/proteinase inhibitor I9 superfamily;Peptidase S8, subtilisin, Ser-active site;Peptidase S8, subtilisin-related;Peptidase S8/S53 domain;Peptidase S8/S53 domain superfamily;Subtilisin-like protease, fibronectin type-III domain;	cytoplasm;extracellular region;nucleus;response to jasmonic acid;serine-type endopeptidase activity;
Q66GI2.1	Single-copy	125	35.5525	21.3361	0.271701		Dirigent protein 22	apoplast;	Q9SS03.1(116.1);F4J4N3.1(109.2);Q9FIG7.1(105.2);Q9FIG6.1(99.1);Q67YM6.1(89.3);Q9SKQ2.1(84.7);F4JUF8.1(83.2);Q9SH66.1(40.5);Q7Y225.1(38.9);Q9T0H8.1(37.4);	Dirigent protein;	(-)-pinoresinol biosynthetic process;apoplast;cell wall;extracellular region;guiding stereospecific synthesis activity;
O80594.2	Single-copy	129	13.4112	30.9102	0.263749		Ergosterol biosynthetic protein 28	endoplasmic reticulum membrane;integral component of membrane;sterol biosynthetic process;protein-macromolecule adaptor activity;	Q8S8S2.1(13.4);	EF-Hand 1, calcium-binding site;EF-hand domain;EF-hand domain pair;Phospholipid/glycerol acyltransferase;	1-alkenylglycerophosphocholine O-acyltransferase activity;calcium ion binding;integral component of membrane;lysophosphatidylethanolamine acyltransferase activity;phospholipid biosynthetic process;phospholipid metabolic process;plasmalogen synthase activity;very long-chain fatty acid metabolic process;
Q9FE62.1	Single-copy	142	13.8578	29.9972	0.24918		Thioredoxin-like protein YLS8	mRNA splicing, via spliceosome;nucleus;U5 snRNP;cytoplasm;U4/U6 x U5 tri-snRNP complex;	Q9FF55.1(13.9);	Disulphide isomerase;Protein disulphide isomerase;Thioredoxin domain;Thioredoxin, conserved site;Thioredoxin-like superfamily;	cell;cell redox homeostasis;cell wall;endoplasmic reticulum;endoplasmic reticulum lumen;extracellular region;mitochondrion;nucleus;plastid;protein disulfide isomerase activity;protein folding;response to endoplasmic reticulum stress;response to oxidative stress;secretory vesicle;vacuolar membrane;
Q8LC53.1	Homologous	120	0.892127	59.8975	0.238136	Q8S8I4.1(53.4);	Protein EPIDERMAL PATTERNING FACTOR 2	extracellular region;guard cell differentiation;stomatal complex development;protein kinase binding;plant epidermis morphogenesis;negative regulation of stomatal complex development;	C4B8C5.1(73.5);	EPIDERMAL PATTERNING FACTOR-like protein;	extracellular region;guard cell differentiation;stomatal complex development;
Q8RV04.1	Homologous	112	40.9555	18.5206	0.236633	Q9SF33.1(184.2);Q9LYY2.1(184.0);	Mitochondrial import inner membrane translocase subunit TIM14-1	PAM complex, Tim23 associated import motor;ATPase activator activity;integral component of membrane;protein import into mitochondrial matrix;	Q94AW8.2(16.5);P42825.2(15.9);Q8RXN4.1(14.9);	Chaperone DnaJ;Chaperone DnaJ, C-terminal;Chaperone J-domain superfamily;ClpP/crotonase-like domain superfamily;DnaJ domain;DnaJ domain, conserved site;Enoyl-CoA hydratase/isomerase, HIBYL-CoA-H type;HSP40/DnaJ peptide-binding;Heat shock protein DnaJ, cysteine-rich domain;Heat shock protein DnaJ, cysteine-rich domain superfamily;	3-hydroxyisobutyryl-CoA hydrolase activity;ATP binding;cell wall;cytosol;heat shock protein binding;metal ion binding;mitochondrion;nucleolus;photoperiodism, flowering;plasma membrane;plasmodesma;plastid;positive regulation of flower development;protein folding;regulation of ATPase activity;response to heat;response to salt stress;unfolded protein binding;
Q9T096.2	Homologous	106	38.2543	18.6887	0.22475	Q9C777.1(112.1);Q9FN32.1(112.0);Q9SR97.2(108.7);Q2V3E2.1(108.1);Q9LY56.1(104.7);	Protein yippee-like At4g27745	metal ion binding;	Q7PC83.1(15.5);Q9C8P0.1(12.8);	2-oxo acid dehydrogenase, lipoyl-binding site;2-oxoacid dehydrogenase acyltransferase, catalytic domain;AAA+ ATPase domain;ABC transporter-like;ABC-2 type transporter;ABC-transporter N-terminal domain;ATP-binding cassette transporter, PDR-like subfamily G, domain 2;Biotin/lipoyl attachment;Chloramphenicol acetyltransferase-like domain superfamily;E3-binding domain superfamily;P-loop containing nu…	ATP binding;ATPase activity;ATPase-coupled transmembrane transporter activity;chloroplast;chloroplast envelope;chloroplast stroma;cytosolic ribosome;dihydrolipoyllysine-residue acetyltransferase activity;glycolytic process;integral component of membrane;nucleus;plasma membrane;protein domain specific binding;transmembrane transport;
Q9LUK2.1	Homologous	114	2.55737	46.2623	0.217875	Q9LH85.1(151.6);P51407.2(95.2);Q9SLF7.1(94.9);Q9LXM8.1(91.4);Q8LEQ0.2(35.1);Q8LCW9.2(32.2);	60S acidic ribosomal protein P2-5	structural constituent of ribosome;cytosol;translational elongation;cytosolic ribosome;	P82873.2(13.1);	Plant specific mitochondrial import receptor subunit TOM20;Tetratricopeptide-like helical domain superfamily;	P-P-bond-hydrolysis-driven protein transmembrane transporter activity;TIM23 mitochondrial import inner membrane translocase complex;cytosolic ribosome;integral component of membrane;metal ion binding;mitochondrial inner membrane;mitochondrial outer membrane;mitochondrial outer membrane translocase complex;mitochondrion;nucleus;protein insertion into mitochondrial outer membrane;protein targeting …
O82205.1	Homologous	129	14.2812	28.093	0.212933	Q9M0E0.1(247.0);P42798.2(133.0);O80646.2(130.1);Q9LX88.3(129.9);	40S ribosomal protein S15a-2	structural constituent of ribosome;translation;cytosolic small ribosomal subunit;	Q8RWL2.2(14.7);	EF-Hand 1, calcium-binding site;EF-hand domain;EF-hand domain pair;Protein kinase domain;Protein kinase, ATP binding site;Protein kinase-like domain superfamily;Serine/threonine-protein kinase, active site;	ATP binding;calcium ion binding;calcium-dependent protein serine/threonine kinase activity;calmodulin binding;cytoplasm;defense response to fungus;intracellular signal transduction;mitochondrion;nucleus;peptidyl-serine phosphorylation;plasma membrane;positive regulation of response to salt stress;protein autophosphorylation;
Q42512.1	Homologous	139	24.5303	22.613	0.212778	Q9SIN5.1(184.6);	Protein COLD-REGULATED 15A, chloroplastic	galactose binding;cytosol;response to osmotic stress;circadian rhythm;lipid binding;response to cold;response to water deprivation;response to light stimulus;chloroplast;chloroplast stroma;cold acclimation;response to high light intensity;response to salt stress;plastid inner membrane organization;response to abscisic acid;drought recovery;chloroplast envelope;red or far-red light signaling pathw…	Q9SKP0.1(19.7);Q9LF88.1(12.9);	Late embryogenesis abundant protein, LEA_4 subgroup;	cytosol;floral organ abscission;
Q9XF04.2	Single-copy	96	16.932	26.301	0.211557		Protein CLAVATA 3	extracellular space;multicellular organism development;regulation of meristem structural organization;maintenance of meristem identity;receptor serine/threonine kinase binding;innate immune response;cell-cell signaling involved in cell fate commitment;apoplast;meristem development;	Q9FMN1.1(11.9);	WEB family;	cell;chloroplast accumulation movement;chloroplast avoidance movement;cytosol;
Q9LM92.1	Homologous	131	12.1038	29.5641	0.208577	Q9S7E6.1(212.7);F4K4E3.1(58.4);Q9SY09.1(50.5);Q9SSF1.1(48.2);	Small nuclear ribonucleoprotein SmD3b	commitment complex;spliceosomal snRNP assembly;mRNA splicing, via spliceosome;RNA binding;U5 snRNP;U1 snRNP;U2 snRNP;U4 snRNP;U12-type spliceosomal complex;nucleolus;cytosol;pICln-Sm protein complex;SMN-Sm protein complex;developmental growth;precatalytic spliceosome;catalytic step 2 spliceosome;spliceosomal tri-snRNP complex;	Q9ZVN4.1(11.9);O80567.2(10.1);	Atypical dual-specificity phosphatase Siw14-like;Atypical dual-specificity phosphatase Siw14-like, plant and fungi;La-type HTH domain;Lupus La protein;Nucleotide-binding alpha-beta plait domain superfamily;Plant La-related protein, RNA recognition motif;Protein-tyrosine phosphatase, active site;Protein-tyrosine phosphatase-like;RNA-binding domain superfamily;Winged helix DNA-binding domain superf…	RNA processing;cytoplasm;mRNA binding;nucleus;phosphatase activity;protein tyrosine phosphatase activity;ribonucleoprotein complex;
Q2V2Y0.1	Single-copy	93	16.4326	26.0645	0.200576		Putative defensin-like protein 282	extracellular region;killing of cells of other organism;defense response to fungus;	Q680I5.1(12.8);	Gamma-glutamyltranspeptidase;Nucleophile aminohydrolases, N-terminal;	apoplast;glutathione catabolic process;glutathione gamma-glutamylcysteinyltransferase activity;glutathione hydrolase activity;glutathione transmembrane transport;hypoglycin A gamma-glutamyl transpeptidase activity;leukotriene C4 gamma-glutamyl transferase activity;peptidyltransferase activity;plasma membrane;
Q9S7E6.1	Homologous	128	12.477	28.6109	0.195766	Q9LM92.1(213.0);F4K4E3.1(57.8);Q9SY09.1(46.5);Q9SSF1.1(45.5);	Small nuclear ribonucleoprotein SmD3a	commitment complex;spliceosomal snRNP assembly;mRNA splicing, via spliceosome;RNA binding;nucleus;U5 snRNP;U1 snRNP;U2 snRNP;U4 snRNP;U12-type spliceosomal complex;nucleolus;cytosol;nuclear body;pICln-Sm protein complex;SMN-Sm protein complex;precatalytic spliceosome;catalytic step 2 spliceosome;spliceosomal tri-snRNP complex;	Q9ZVN4.1(11.9);O80567.2(10.1);	Atypical dual-specificity phosphatase Siw14-like;Atypical dual-specificity phosphatase Siw14-like, plant and fungi;La-type HTH domain;Lupus La protein;Nucleotide-binding alpha-beta plait domain superfamily;Plant La-related protein, RNA recognition motif;Protein-tyrosine phosphatase, active site;Protein-tyrosine phosphatase-like;RNA-binding domain superfamily;Winged helix DNA-binding domain superf…	RNA processing;cytoplasm;mRNA binding;nucleus;phosphatase activity;protein tyrosine phosphatase activity;ribonucleoprotein complex;
Q9SV72.1	Single-copy	102	0.842726	57.8804	0.193283		EPIDERMAL PATTERNING FACTOR-like protein 9	signaling receptor binding;cell-cell signaling;guard cell differentiation;stomatal complex development;stomatal complex patterning;protein kinase binding;receptor serine/threonine kinase binding;apoplast;regulation of stomatal complex development;positive regulation of stomatal complex development;	Q1PEY6.1(12.3);	EPIDERMAL PATTERNING FACTOR-like protein;	extracellular region;guard cell differentiation;stomatal complex development;
Q8LEQ4.1	Single-copy	89	13.2352	27.4921	0.18599		Dolichol-phosphate mannose synthase subunit 3	endoplasmic reticulum;endoplasmic reticulum membrane;protein glycosylation;GPI anchor biosynthetic process;integral component of membrane;dolichol-phosphate-mannose synthase complex;mannosylation;	F4JPW1.1(12.1);	Bile acid:sodium symporter;Bile acid:sodium symporter/arsenical resistance protein Acr3;Sodium/solute symporter superfamily;	chloroplast envelope;glucosinolate biosynthetic process;glucosinolate biosynthetic process from homomethionine;integral component of membrane;monocarboxylic acid transmembrane transporter activity;plastid;response to jasmonic acid;response to wounding;
Q3EA33.1	Homologous	125	11.517	28.6504	0.181407	Q9STJ9.1(93.7);	Putative zinc finger A20 and AN1 domain-containing stress-associated protein 8	DNA binding;zinc ion binding;	Q94B40.2(114.1);Q8H0X0.2(109.6);Q8VZ42.1(18.9);Q9SCM4.1(15.2);	AN1-like Zinc finger;Zinc finger C2H2-type;Zinc finger, A20-type;Zinc finger, AN1-type;	DNA binding;cellular response to hypoxia;cytoplasm;nucleic acid binding;nucleus;response to abscisic acid;response to chitin;response to salt stress;stress response to metal ion;transcription regulatory region DNA binding;zinc ion binding;
Q9ZVR3.1	Single-copy	144	6.8619	33.4223	0.172519		Putative protein PHLOEM PROTEIN 2-LIKE B4	carbohydrate binding;	Q9ZVR1.1(53.5);	F-box-like domain superfamily;Phloem protein 2-like;	carbohydrate binding;
Q8L5T9.2	Homologous	147	3.81049	39.3714	0.170198	Q41906.2(42.3);Q41916.2(36.1);Q84WT8.2(32.8);	Cysteine proteinase inhibitor 2	cysteine-type endopeptidase inhibitor activity;extracellular region;defense response;	Q9SIU9.1(18.2);	Protein MS5;
Q8GWP3.1	Homologous	145	7.08838	32.7469	0.166848	Q8SAA5.2(116.2);Q93VM8.1(57.8);	Copper transporter 6	copper ion transmembrane transporter activity;cell;vacuole;plasma membrane;cellular copper ion homeostasis;integral component of membrane;	Q9SNB6.1(10.7);	Domain of unknown function DUF1117;E3 ubiquitin-protein ligase RNF126-like, zinc-ribbon;Zinc finger, RING-type;Zinc finger, RING/FYVE/PHD-type;	abscisic acid-activated signaling pathway;cytoplasm;cytosol;metal ion binding;nucleus;protein autoubiquitination;protein ubiquitination;response to abscisic acid;response to chitin;response to water deprivation;ubiquitin protein ligase activity;ubiquitin-protein transferase activity;
Q9SR97.2	Homologous	128	35.1931	16.4969	0.166261	Q9LY56.1(164.9);Q9C777.1(163.1);Q9FN32.1(145.3);Q9T096.2(109.8);Q2V3E2.1(83.7);	Protein yippee-like At3g08990	ubiquitin ligase complex;metal ion binding;	Q7PC83.1(15.5);Q9C8P0.1(12.8);	2-oxo acid dehydrogenase, lipoyl-binding site;2-oxoacid dehydrogenase acyltransferase, catalytic domain;AAA+ ATPase domain;ABC transporter-like;ABC-2 type transporter;ABC-transporter N-terminal domain;ATP-binding cassette transporter, PDR-like subfamily G, domain 2;Biotin/lipoyl attachment;Chloramphenicol acetyltransferase-like domain superfamily;E3-binding domain superfamily;P-loop containing nu…	ATP binding;ATPase activity;ATPase-coupled transmembrane transporter activity;chloroplast;chloroplast envelope;chloroplast stroma;cytosolic ribosome;dihydrolipoyllysine-residue acetyltransferase activity;glycolytic process;integral component of membrane;nucleus;plasma membrane;protein domain specific binding;transmembrane transport;
F4K4E3.1	Homologous	129	26.4169	19.3101	0.165091	Q9S7E6.1(66.1);Q9LM92.1(62.4);Q9SSF1.1(48.0);Q9SY09.1(45.0);Q1H595.1(31.1);	Sm-like protein LSM4	spliceosomal snRNP assembly;P-body;nuclear-transcribed mRNA catabolic process;RNA binding;spliceosomal complex;U6 snRNP;cytosol;plastid;U6 snRNA binding;cytoplasmic mRNA processing body assembly;spliceosomal tri-snRNP complex;	Q94AM9.1(12.1);Q8L793.1(12.0);	Ataxin 2, SM domain;Ataxin-2, C-terminal;LsmAD domain;	RNA binding;cytoplasmic stress granule;mRNA binding;regulation of cytoplasmic mRNA processing body assembly;stress granule assembly;
Q9SA42.1	Single-copy	150	5.96517	34.1447	0.160905		Mediator of RNA polymerase II transcription subunit 22a	transcription coregulator activity;regulation of transcription by RNA polymerase II;mediator complex;	Q9STX0.1(13.1);	WRKY domain;WRKY domain superfamily;Zn-cluster domain;	DNA-binding transcription factor activity;calmodulin binding;nucleus;sequence-specific DNA binding;transcription regulatory region DNA binding;
Q9M1C2.1	Homologous	138	4.59658	36.1384	0.15045	O80504.1(198.1);	10 kDa chaperonin 1, chloroplastic	mitochondrial matrix;cytosol;chloroplast;plastid;metal ion binding;unfolded protein binding;chaperone cofactor-dependent protein refolding;chaperone binding;	O65282.2(50.0);	Chaperonin Cpn20;Chaperonin GroES, conserved site;GroES chaperonin family;GroES chaperonin superfamily;GroES-like superfamily;	ATP binding;apoplast;chaperone binding;chaperone cofactor-dependent protein refolding;chloroplast;chloroplast envelope;chloroplast stroma;chloroplast thylakoid membrane;copper ion binding;metal ion binding;mitochondrial matrix;mitochondrion;negative regulation of abscisic acid-activated signaling pathway;plastid;positive regulation of superoxide dismutase activity;protein heterotetramerization;re…
Q9SLJ2.1	Single-copy	98	8.15631	30.2092	0.149745		Dehydrin HIRD11	copper ion binding;nucleus;cytoplasm;cytosol;zinc ion binding;negative regulation of hydrogen peroxide biosynthetic process;nickel cation binding;cobalt ion binding;	P42759.1(14.4);	Dehydrin;Dehydrin, conserved site;	actin binding;cold acclimation;copper ion binding;cytoplasm;cytosol;extrinsic component of membrane;membrane;nickel cation binding;nucleus;phosphatidylcholine binding;phosphatidylserine binding;plasmodesma;protein stabilization;regulation of membrane permeability;regulation of seed germination;response to abscisic acid;response to cold;response to water deprivation;
Q8LFD5.1	Single-copy	120	34.8566	15.5367	0.14966		Uncharacterized protein At4g13230	cytosol;	Q9SKP0.1(21.5);Q9LF88.1(20.3);	Late embryogenesis abundant protein, LEA_4 subgroup;	cytosol;floral organ abscission;
Q9SIM4.1	Homologous	134	15.6219	23.5776	0.149097	Q9T043.1(244.5);	60S ribosomal protein L14-1	RNA binding;structural constituent of ribosome;mitochondrion;vacuole;endoplasmic reticulum;translation;plasmodesma;cytosolic large ribosomal subunit;ribosomal large subunit biogenesis;	F4JMJ1.1(11.8);	Heat shock protein 70 family;Heat shock protein 70, conserved site;Heat shock protein 70kD, C-terminal domain superfamily;Heat shock protein 70kD, peptide-binding domain superfamily;	ATP binding;Golgi apparatus;cellular response to hypoxia;cytosol;endoplasmic reticulum;endoplasmic reticulum chaperone complex;endoplasmic reticulum lumen;negative regulation of hypoxia-induced intrinsic apoptotic signaling pathway;secretory vesicle;vacuolar membrane;
A1XJK0.3	Single-copy	142	2.49481	42.343	0.147707		Mitochondrial import inner membrane translocase subunit TIM22-4	protein transmembrane transporter activity;integral component of membrane;mitochondrion targeting sequence binding;TIM22 mitochondrial import inner membrane insertion complex;protein insertion into mitochondrial inner membrane;	Q94EH2.1(46.4);Q6NKU9.1(46.3);Q38820.1(18.3);	Mitochondrial import inner membrane translocase subunit TIM22;Mitochondrial inner membrane translocase complex, subunit Tim23;	P-P-bond-hydrolysis-driven protein transmembrane transporter activity;TIM22 mitochondrial import inner membrane insertion complex;TIM23 mitochondrial import inner membrane translocase complex;chloroplast;chloroplast envelope;chloroplast outer membrane;integral component of membrane;integral component of mitochondrial inner membrane;mitochondrial inner membrane;mitochondrion;protein homodimerizati…
Q9SAD3.1	Homologous	110	1.43222	48.1664	0.145019	Q1G3Y4.1(112.9);Q29Q81.1(79.1);Q9LVX6.1(51.2);Q9LNX4.1(31.7);	Cyclin-dependent protein kinase inhibitor SMR8	protein kinase inhibitor activity;nucleus;cell cycle;regulation of DNA endoreduplication;negative regulation of cell cycle;negative regulation of mitotic nuclear division;	O80930.1(36.1);Q9ZV27.1(22.8);	Cyclin-dependent protein kinase inhibitor SMR;	cell cycle;negative regulation of cell cycle;negative regulation of mitotic nuclear division;nucleus;protein kinase inhibitor activity;regulation of DNA endoreduplication;
Q84WT8.2	Homologous	117	7.99447	29.9641	0.143284	Q41916.2(82.5);Q41906.2(50.7);Q945Q1.2(46.4);Q8L5T9.2(34.7);	Cysteine proteinase inhibitor 4	cysteine-type endopeptidase inhibitor activity;extracellular region;cell wall;vacuole;cytosol;defense response;plasmodesma;secretory vesicle;	Q9SIU9.1(18.5);	Protein MS5;
Q9FFZ6.1	Homologous	146	3.61082	37.4753	0.134461	Q9LIS2.1(81.0);Q9SIX3.2(59.2);	Small RNA-binding protein 11, chloroplastic	RNA binding;nucleus;chloroplast;regulation of RNA metabolic process;positive regulation of response to salt stress;ribonucleoprotein complex;	Q9LIN3.1(103.4);	Nucleotide-binding alpha-beta plait domain superfamily;RNA recognition motif domain;RNA-binding domain superfamily;Zinc finger, CCHC-type;Zinc finger, CCHC-type superfamily;	DNA binding;RNA binding;cytoplasm;cytosol;mRNA binding;nucleotide binding;nucleus;regulation of RNA metabolic process;response to cold;ribonucleoprotein complex;zinc ion binding;
O80504.1	Homologous	139	4.41711	35.0935	0.130656	Q9M1C2.1(198.6);	10 kDa chaperonin 2, chloroplastic	mitochondrial matrix;cytosol;protein folding;chloroplast;plastid;chloroplast stroma;chloroplast envelope;protein domain specific binding;metal ion binding;unfolded protein binding;chaperone cofactor-dependent protein refolding;chaperone binding;	O65282.2(50.0);	Chaperonin Cpn20;Chaperonin GroES, conserved site;GroES chaperonin family;GroES chaperonin superfamily;GroES-like superfamily;	ATP binding;apoplast;chaperone binding;chaperone cofactor-dependent protein refolding;chloroplast;chloroplast envelope;chloroplast stroma;chloroplast thylakoid membrane;copper ion binding;metal ion binding;mitochondrial matrix;mitochondrion;negative regulation of abscisic acid-activated signaling pathway;plastid;positive regulation of superoxide dismutase activity;protein heterotetramerization;re…
Q9C777.1	Homologous	129	35.0574	13.9891	0.12902	Q9SR97.2(162.8);Q9LY56.1(159.9);Q9FN32.1(140.5);Q9T096.2(112.5);Q2V3E2.1(83.5);	Protein yippee-like At3g11230	ubiquitin ligase complex;metal ion binding;	Q7PC83.1(15.5);Q9C8P0.1(12.8);	2-oxo acid dehydrogenase, lipoyl-binding site;2-oxoacid dehydrogenase acyltransferase, catalytic domain;AAA+ ATPase domain;ABC transporter-like;ABC-2 type transporter;ABC-transporter N-terminal domain;ATP-binding cassette transporter, PDR-like subfamily G, domain 2;Biotin/lipoyl attachment;Chloramphenicol acetyltransferase-like domain superfamily;E3-binding domain superfamily;P-loop containing nu…	ATP binding;ATPase activity;ATPase-coupled transmembrane transporter activity;chloroplast;chloroplast envelope;chloroplast stroma;cytosolic ribosome;dihydrolipoyllysine-residue acetyltransferase activity;glycolytic process;integral component of membrane;nucleus;plasma membrane;protein domain specific binding;transmembrane transport;
Q3E7N5.1	Homologous	126	36.2909	13.6159	0.128684	Q1G3Z6.1(152.8);Q8GWU1.2(37.0);	B3 domain-containing protein At5g54067	DNA binding;nucleus;	Q9SJ07.1(115.9);Q9LS06.1(19.9);Q9ZWM9.1(17.9);	AP2/ERF domain;AP2/ERF domain superfamily;B3 DNA binding domain;DNA-binding domain superfamily;DNA-binding pseudobarrel domain superfamily;F-box associated domain, type 3;	DNA binding;DNA-binding transcription factor activity;cellular response to hypoxia;ethylene-activated signaling pathway;lateral root development;leaf development;negative regulation of flower development;negative regulation of transcription, DNA-templated;nucleus;response to brassinosteroid;transcription regulatory region DNA binding;
Q6DSU1.1	Homologous	109	9.95382	26.455	0.126273	Q6ID76.1(78.6);	Root meristem growth factor 2	extracellular space;growth factor activity;positive regulation of cell population proliferation;regulation of root meristem growth;positive regulation of gene expression;cell differentiation;	Q9FL16.1(14.3);	Haem peroxidase;Haem peroxidase superfamily;Peroxidase, active site;Peroxidases heam-ligand binding site;Plant peroxidase;Secretory peroxidase;	extracellular region;heme binding;hydrogen peroxide catabolic process;metal ion binding;peroxidase activity;response to oxidative stress;
Q9LY56.1	Homologous	121	36.1511	13.1289	0.122116	Q9SR97.2(163.9);Q9C777.1(159.4);Q9FN32.1(141.5);Q9T096.2(104.8);Q2V3E2.1(72.2);	Protein yippee-like At3g55890	ubiquitin ligase complex;metal ion binding;	Q7PC83.1(15.5);Q9C8P0.1(12.8);	2-oxo acid dehydrogenase, lipoyl-binding site;2-oxoacid dehydrogenase acyltransferase, catalytic domain;AAA+ ATPase domain;ABC transporter-like;ABC-2 type transporter;ABC-transporter N-terminal domain;ATP-binding cassette transporter, PDR-like subfamily G, domain 2;Biotin/lipoyl attachment;Chloramphenicol acetyltransferase-like domain superfamily;E3-binding domain superfamily;P-loop containing nu…	ATP binding;ATPase activity;ATPase-coupled transmembrane transporter activity;chloroplast;chloroplast envelope;chloroplast stroma;cytosolic ribosome;dihydrolipoyllysine-residue acetyltransferase activity;glycolytic process;integral component of membrane;nucleus;plasma membrane;protein domain specific binding;transmembrane transport;
Q9SIX3.2	Homologous	149	3.11783	37.602	0.117527	Q9LIS2.1(69.3);Q9FFZ6.1(60.6);	Probable glycine-rich RNA-binding protein 1	RNA binding;response to cold;	Q9LIN3.1(103.4);	Nucleotide-binding alpha-beta plait domain superfamily;RNA recognition motif domain;RNA-binding domain superfamily;Zinc finger, CCHC-type;Zinc finger, CCHC-type superfamily;	DNA binding;RNA binding;cytoplasm;cytosol;mRNA binding;nucleotide binding;nucleus;regulation of RNA metabolic process;response to cold;ribonucleoprotein complex;zinc ion binding;
Q9ZSP6.1	Homologous	108	5.41197	31.4102	0.111778	Q9S7I2.1(181.4);Q8RW93.1(86.6);	Putative lipid-binding protein AIR1B	extracellular region;	Q9SU35.1(118.8);Q9SU34.1(118.6);	Bifunctional inhibitor/plant lipid transfer protein/seed storage helical domain;Bifunctional inhibitor/plant lipid transfer protein/seed storage helical domain superfamily;Hydrophobic seed protein domain;	apoplast;cell wall;cellular response to cold;chloroplast outer membrane;cold acclimation;defense response to fungus;endoplasmic reticulum;extracellular region;induced systemic resistance;plant-type hypersensitive response;plasmodesma;protein self-association;systemic acquired resistance;
Q9CA23.1	Single-copy	93	10.8878	23.0699	0.098817		Ubiquitin-fold modifier 1	nucleus;cytoplasm;cytosol;protein K69-linked ufmylation;	Q94K71.1(12.9);	HAD hydrolase, subfamily IA;HAD superfamily;HAD-like superfamily;Haloacid dehalogenase-like hydrolase;Phosphoglycolate phosphatase-like, domain 2;	chloroplast;chloroplast envelope;chloroplast stroma;cytosol;hydrolase activity;metal ion binding;
Q6NQ54.1	Single-copy	115	17.8375	18.0826	0.098669		Transcription and mRNA export factor ENY2	SAGA complex;chromatin binding;transcription coactivator activity;nuclear pore;nucleoplasm;regulation of transcription by RNA polymerase II;transcription elongation from RNA polymerase II promoter;histone deubiquitination;poly(A)+ mRNA export from nucleus;positive regulation of transcription, DNA-templated;transcription export complex 2;DUBm complex;	Q9FPS2.1(14.8);	Papain-like cysteine peptidase superfamily;Peptidase C19, ubiquitin carboxyl-terminal hydrolase;Ubiquitin specific protease domain;Ubiquitin specific protease, conserved site;	cysteine-type endopeptidase activity;protein deubiquitination;thiol-dependent ubiquitin-specific protease activity;ubiquitin-dependent protein catabolic process;
Q41916.2	Homologous	122	7.20178	26.9869	0.096285	Q84WT8.2(83.2);Q41906.2(54.6);Q945Q1.2(43.0);Q8L5T9.2(38.7);	Cysteine proteinase inhibitor 5	cysteine-type endopeptidase inhibitor activity;extracellular region;cell wall;defense response;positive regulation of seed germination;cellular response to heat;	Q9SIU9.1(18.5);	Protein MS5;
Q9FLY6.1	Homologous	132	0.837307	49.5561	0.095972	Q9FIV3.1(95.4);Q1G373.1(79.1);Q8GX02.1(71.7);Q9LW22.1(47.1);B3H4B5.1(45.6);B3H6H8.1(42.7);Q9FF19.1(40.5);B3H453.1(39.2);	S-protein homolog 15	extracellular region;rejection of self pollen;	Q9FJ04.1(61.5);	Plant self-incompatibility S1;	extracellular region;rejection of self pollen;
Q9LXM8.1	Homologous	111	2.86312	36.2514	0.094742	P51407.2(139.1);Q9SLF7.1(133.4);Q9LUK2.1(92.1);Q9LH85.1(85.4);Q8LCW9.2(45.2);O23095.2(42.0);Q8LEQ0.2(41.8);	60S acidic ribosomal protein P2-4	structural constituent of ribosome;nucleus;cytosol;translational elongation;cytosolic ribosome;secretory vesicle;	Q9SRX2.1(10.9);	60S ribosomal protein L19;Ribosomal protein L19, eukaryotic;Ribosomal protein L19/L19e;Ribosomal protein L19/L19e conserved site;Ribosomal protein L19/L19e superfamily;Ribosomal protein L19/L19e, domain 1;	RNA binding;cytosol;cytosolic large ribosomal subunit;cytosolic ribosome;extracellular region;mRNA binding;nucleolus;plasma membrane;plasmodesma;polysomal ribosome;structural constituent of ribosome;translation;
Q8RW93.1	Homologous	128	0.955145	47.6812	0.092577	Q9S7I2.1(94.4);Q9ZSP6.1(84.6);	Putative lipid-binding protein At4g00165	extracellular region;	Q9SU34.1(118.6);	Bifunctional inhibitor/plant lipid transfer protein/seed storage helical domain;Bifunctional inhibitor/plant lipid transfer protein/seed storage helical domain superfamily;Hydrophobic seed protein domain;	cell wall;chloroplast outer membrane;defense response to fungus;endoplasmic reticulum;extracellular region;plasmodesma;
Q9LH85.1	Homologous	115	2.56108	36.8	0.08936	Q9LUK2.1(151.6);Q9SLF7.1(91.4);P51407.2(91.0);Q9LXM8.1(84.8);	60S acidic ribosomal protein P2-3	structural constituent of ribosome;cytosol;plasma membrane;translational elongation;cytosolic ribosome;polysomal ribosome;	P82873.2(14.4);	Plant specific mitochondrial import receptor subunit TOM20;Tetratricopeptide-like helical domain superfamily;	P-P-bond-hydrolysis-driven protein transmembrane transporter activity;TIM23 mitochondrial import inner membrane translocase complex;cytosolic ribosome;integral component of membrane;metal ion binding;mitochondrial inner membrane;mitochondrial outer membrane;mitochondrial outer membrane translocase complex;mitochondrion;nucleus;protein insertion into mitochondrial outer membrane;protein targeting …
Q9T043.1	Homologous	134	15.6219	18.3	0.088302	Q9SIM4.1(244.2);	60S ribosomal protein L14-2	RNA binding;mRNA binding;structural constituent of ribosome;nucleolus;vacuole;vacuolar membrane;endoplasmic reticulum;cytosol;translation;plasmodesma;cytosolic large ribosomal subunit;cytosolic ribosome;ribosomal large subunit biogenesis;polysomal ribosome;	F4JMJ1.1(11.8);	Heat shock protein 70 family;Heat shock protein 70, conserved site;Heat shock protein 70kD, C-terminal domain superfamily;Heat shock protein 70kD, peptide-binding domain superfamily;	ATP binding;Golgi apparatus;cellular response to hypoxia;cytosol;endoplasmic reticulum;endoplasmic reticulum chaperone complex;endoplasmic reticulum lumen;negative regulation of hypoxia-induced intrinsic apoptotic signaling pathway;secretory vesicle;vacuolar membrane;
Q9SRK6.1	Homologous	92	3.14788	33.6467	0.080893	Q8RXU5.1(165.5);	Putative 60S ribosomal protein L37a-1	structural constituent of ribosome;cytosol;translation;cytosolic large ribosomal subunit;metal ion binding;	Q8GWS0.1(15.8);	Glutaredoxin;Glutaredoxin subgroup;Glutaredoxin, eukaryotic/virial;Thioredoxin-like superfamily;	cell;cell redox homeostasis;cellular response to oxidative stress;chloroplast;cytoplasm;electron transfer activity;glutathione-disulfide reductase activity;iron-sulfur cluster assembly;protein disulfide oxidoreductase activity;
Q945Q1.2	Homologous	101	8.96207	22.9584	0.080446	Q41906.2(90.0);Q84WT8.2(46.8);Q41916.2(42.9);	Cysteine proteinase inhibitor 1	cysteine-type endopeptidase inhibitor activity;vacuolar membrane;endoplasmic reticulum;cytosol;plasma membrane;defense response;plastid;response to wounding;cellular response to heat;cellular response to water deprivation;cellular response to cold;	Q9SIU9.1(14.0);	Protein MS5;
Q9LZH8.1	Homologous	136	14.0675	17.2206	0.071421	Q9ZV24.1(36.7);	Outer envelope pore protein 16-4, chloroplastic	ion transport;protein transmembrane transporter activity;plastid outer membrane;chloroplast outer membrane;porin activity;mitochondrion targeting sequence binding;TIM22 mitochondrial import inner membrane insertion complex;protein homodimerization activity;protein insertion into mitochondrial inner membrane;pore complex;	Q6NKU9.1(19.3);Q94EH2.1(18.2);Q9SK50.1(12.0);	Mitochondrial import inner membrane translocase subunit TIM22;Pheophorbide a oxygenase;Rieske [2Fe-2S] iron-sulphur domain;Rieske [2Fe-2S] iron-sulphur domain superfamily;	2 iron, 2 sulfur cluster binding;TIM22 mitochondrial import inner membrane insertion complex;chlorophyllide a oxygenase [overall] activity;chloroplast;chloroplast envelope;chloroplast inner membrane;chloroplast outer membrane;integral component of membrane;metal ion binding;mitochondrion;protein homodimerization activity;protein insertion into mitochondrial inner membrane;protein targeting to chl…
Q9S7I2.1	Homologous	111	4.37503	27.9261	0.064168	Q9ZSP6.1(180.3);Q8RW93.1(95.1);	Putative lipid-binding protein AIR1	extracellular region;response to auxin;lateral root morphogenesis;	Q9SU35.1(118.8);Q9SU34.1(118.7);	Bifunctional inhibitor/plant lipid transfer protein/seed storage helical domain;Bifunctional inhibitor/plant lipid transfer protein/seed storage helical domain superfamily;Hydrophobic seed protein domain;	apoplast;cell wall;cellular response to cold;chloroplast outer membrane;cold acclimation;defense response to fungus;endoplasmic reticulum;extracellular region;induced systemic resistance;plant-type hypersensitive response;plasmodesma;protein self-association;systemic acquired resistance;
A8MS78.1	Single-copy	127	1.14367	41.0961	0.060192		Uncharacterized protein At1g05835	cell fate determination;	Q1G3T1.1(38.9);Q6TLJ2.1(30.4);	Tapetum determinant 1;	anther development;cell fate determination;response to heat;
P41568.2	Homologous	113	1.63399	35.8513	0.052016	Q94JV4.1(218.3);	Protein translation factor SUI1 homolog 1	RNA binding;translation initiation factor activity;cytosol;	Q9C514.1(13.1);	Ribosomal protein S7e;	cell wall;cytosol;cytosolic ribosome;cytosolic small ribosomal subunit;mRNA binding;nucleus;plasma membrane;polysomal ribosome;rRNA processing;ribosomal small subunit biogenesis;small-subunit processome;structural constituent of ribosome;translation;
F4JWS8.1	Homologous	122	0.836977	42.7959	0.051708	Q9SUU5.1(201.9);	Cytochrome b-c1 complex subunit 7-2, mitochondrial	mitochondrion;mitochondrial respiratory chain complex III;mitochondrial electron transport, ubiquinol to cytochrome c;aerobic respiration;plastid;mitochondrial respiratory chain complex III assembly;	Q9LSQ1.1(14.4);	LURP-one-related;LURP-one-related superfamily;Tubby-like, C-terminal;
Q1G3Z6.1	Homologous	112	23.8879	7.67589	0.046841	Q3E7N5.1(153.1);Q8GWU1.2(36.6);Q9ZU26.1(33.4);Q9LH88.1(30.7);	B3 domain-containing protein At1g43171	DNA binding;nucleus;	Q9SJ07.1(109.0);	B3 DNA binding domain;DNA-binding pseudobarrel domain superfamily;F-box associated domain, type 3;	DNA binding;nucleus;
Q9SSF1.1	Homologous	114	14.5292	11.1851	0.040433	Q9SY09.1(204.9);Q9LM92.1(47.8);F4K4E3.1(47.1);Q9S7E6.1(43.1);	Small nuclear ribonucleoprotein SmD1a	commitment complex;spliceosomal snRNP assembly;RNA binding;nucleus;U5 snRNP;U1 snRNP;U2 snRNP;U4 snRNP;U12-type spliceosomal complex;nucleolus;vacuolar membrane;cytosol;nuclear speck;pICln-Sm protein complex;SMN-Sm protein complex;posttranscriptional gene silencing by RNA;precatalytic spliceosome;catalytic step 2 spliceosome;spliceosomal tri-snRNP complex;	Q9ZVN4.1(11.9);O80567.2(10.1);	Atypical dual-specificity phosphatase Siw14-like;Atypical dual-specificity phosphatase Siw14-like, plant and fungi;La-type HTH domain;Lupus La protein;Nucleotide-binding alpha-beta plait domain superfamily;Plant La-related protein, RNA recognition motif;Protein-tyrosine phosphatase, active site;Protein-tyrosine phosphatase-like;RNA-binding domain superfamily;Winged helix DNA-binding domain superf…	RNA processing;cytoplasm;mRNA binding;nucleus;phosphatase activity;protein tyrosine phosphatase activity;ribonucleoprotein complex;
Q8RXU5.1	Homologous	92	3.14788	25.8804	0.037731	Q9SRK6.1(165.7);	60S ribosomal protein L37a-2	structural constituent of ribosome;cytosol;translation;cytosolic large ribosomal subunit;metal ion binding;	Q8GWS0.1(15.8);	Glutaredoxin;Glutaredoxin subgroup;Glutaredoxin, eukaryotic/virial;Thioredoxin-like superfamily;	cell;cell redox homeostasis;cellular response to oxidative stress;chloroplast;cytoplasm;electron transfer activity;glutathione-disulfide reductase activity;iron-sulfur cluster assembly;protein disulfide oxidoreductase activity;
Q8SAA5.2	Homologous	145	7.08838	17.3166	0.036333	Q8GWP3.1(116.3);Q93VM8.1(47.0);	Copper transporter 4	copper ion transmembrane transporter activity;cell;plasma membrane;cellular copper ion homeostasis;integral component of membrane;	Q9SNB6.1(10.7);	Domain of unknown function DUF1117;E3 ubiquitin-protein ligase RNF126-like, zinc-ribbon;Zinc finger, RING-type;Zinc finger, RING/FYVE/PHD-type;	abscisic acid-activated signaling pathway;cytoplasm;cytosol;metal ion binding;nucleus;protein autoubiquitination;protein ubiquitination;response to abscisic acid;response to chitin;response to water deprivation;ubiquitin protein ligase activity;ubiquitin-protein transferase activity;
P56792.1	Homologous	122	2.98771	25.6967	0.035167	P49690.3(54.7);	50S ribosomal protein L14, chloroplastic	structural constituent of ribosome;mitochondrial large ribosomal subunit;translation;chloroplast;chloroplast thylakoid;chloroplast stroma;large ribosomal subunit rRNA binding;	Q93Z17.1(75.3);Q84JG5.1(63.2);	Ribosomal protein L14 superfamily;Ribosomal protein L14P;Ribosomal protein L14P, conserved site;Ribosomal protein L14P, bacterial-type;	embryo sac development;integument development;large ribosomal subunit rRNA binding;mitochondrial large ribosomal subunit;mitochondrion;negative regulation of cell death;plant ovule development;response to brassinosteroid;structural constituent of ribosome;translation;
Q9ZV24.1	Homologous	148	12.1562	11.3433	0.034367	Q9LZH8.1(35.9);	Outer envelope pore protein 16-1, chloroplastic	vacuole;peroxisome;response to cold;chloroplast;plastid outer membrane;plastid;response to wounding;chloroplast outer membrane;response to sucrose;response to glucose;response to jasmonic acid;chloroplast envelope;amino acid transmembrane transporter activity;porin activity;protein domain specific binding;etioplast membrane;protein homodimerization activity;protein import into chloroplast stroma;…	Q6NKU9.1(19.3);Q94EH2.1(18.2);Q9SK50.1(12.0);	Mitochondrial import inner membrane translocase subunit TIM22;Pheophorbide a oxygenase;Rieske [2Fe-2S] iron-sulphur domain;Rieske [2Fe-2S] iron-sulphur domain superfamily;	2 iron, 2 sulfur cluster binding;TIM22 mitochondrial import inner membrane insertion complex;chlorophyllide a oxygenase [overall] activity;chloroplast;chloroplast envelope;chloroplast inner membrane;chloroplast outer membrane;integral component of membrane;metal ion binding;mitochondrion;protein homodimerization activity;protein insertion into mitochondrial inner membrane;protein targeting to chl…
Q94JV4.1	Homologous	113	1.63399	31.4894	0.034011	P41568.2(218.3);	Protein translation factor SUI1 homolog 2	RNA binding;translation initiation factor activity;nucleus;cytosol;	Q9C514.1(13.1);	Ribosomal protein S7e;	cell wall;cytosol;cytosolic ribosome;cytosolic small ribosomal subunit;mRNA binding;nucleus;plasma membrane;polysomal ribosome;rRNA processing;ribosomal small subunit biogenesis;small-subunit processome;structural constituent of ribosome;translation;
Q9SUU5.1	Homologous	122	0.836977	38.0238	0.032856	F4JWS8.1(201.6);	Cytochrome b-c1 complex subunit 7-1, mitochondrial	mitochondrion;mitochondrial respiratory chain complex III;vacuolar membrane;plasma membrane;mitochondrial electron transport, ubiquinol to cytochrome c;aerobic respiration;plastid;mitochondrial respiratory chain complex III assembly;	Q9LSQ1.1(14.4);	LURP-one-related;LURP-one-related superfamily;Tubby-like, C-terminal;
Q1G3Y4.1	Homologous	106	1.90312	29.4934	0.032568	Q9SAD3.1(113.2);Q29Q81.1(63.6);Q9LVX6.1(37.5);Q1JPP8.1(34.2);Q3ECS5.1(33.4);F4IWB3.1(32.5);Q9LNX4.1(31.9);	Cyclin-dependent protein kinase inhibitor SMR15	protein kinase inhibitor activity;nucleus;cell cycle;regulation of DNA endoreduplication;negative regulation of cell cycle;negative regulation of mitotic nuclear division;	O80930.1(35.1);Q9ZV27.1(20.9);	Cyclin-dependent protein kinase inhibitor SMR;	cell cycle;negative regulation of cell cycle;negative regulation of mitotic nuclear division;nucleus;protein kinase inhibitor activity;regulation of DNA endoreduplication;
Q8LG89.2	Single-copy	129	15.1692	8.13178	0.031129		Basic blue protein	electron transfer activity;pollination;extracellular matrix;anchored component of plasma membrane;metal ion binding;apoplast;anther development;secretory vesicle;	Q9SK27.2(45.6);Q8LC95.2(37.7);Q9T076.1(31.1);	Cupredoxin;Early nodulin-like protein domain;Phytocyanin;Phytocyanin domain;	anchored component of membrane;anchored component of plasma membrane;apoplast;chloroplast;cytosol;electron transfer activity;plasma membrane;plasmodesma;plastid;secretory vesicle;vacuole;
B3H730.1	Homologous	134	0.607395	37.444	0.02255	Q3E9W6.1(212.3);B3H7A6.1(188.7);O23020.1(81.7);Q9FMQ4.1(77.5);P0DN93.1(60.3);F2Q9V4.2(37.7);P0DN92.1(36.6);	S-protein homolog 18	extracellular region;rejection of self pollen;	Q9FJ04.1(32.7);	Plant self-incompatibility S1;	extracellular region;rejection of self pollen;
Q9SF53.1	Homologous	123	0.505775	38.4667	0.020717	Q9LZ41.1(211.7);O80626.1(208.5);Q9M3D2.1(208.3);	60S ribosomal protein L35-1	maturation of LSU-rRNA from tricistronic rRNA transcript (SSU-rRNA, 5.8S rRNA, LSU-rRNA);mRNA binding;structural constituent of ribosome;nucleolus;cytosol;translation;plasmodesma;cytosolic large ribosomal subunit;	Q9FJP3.1(18.9);	Ribosomal protein L29/L35;Ribosomal protein L29/L35 superfamily;	chloroplast;chloroplast envelope;chloroplast nucleoid;chloroplast stroma;plastid;ribosome;structural constituent of ribosome;translation;
Q9LZ41.1	Homologous	123	0.505775	37.2447	0.01842	O80626.1(212.1);Q9SF53.1(211.4);Q9M3D2.1(205.5);	60S ribosomal protein L35-4	maturation of LSU-rRNA from tricistronic rRNA transcript (SSU-rRNA, 5.8S rRNA, LSU-rRNA);mRNA binding;structural constituent of ribosome;translation;cytosolic large ribosomal subunit;	Q9FJP3.1(18.9);	Ribosomal protein L29/L35;Ribosomal protein L29/L35 superfamily;	chloroplast;chloroplast envelope;chloroplast nucleoid;chloroplast stroma;plastid;ribosome;structural constituent of ribosome;translation;
Q9LYG1.1	Homologous	133	4.4129	15.0564	0.018062	A1XJK0.3(30.2);	Mitochondrial import inner membrane translocase subunit TIM17-3	TIM23 mitochondrial import inner membrane translocase complex;protein import into mitochondrial matrix;integral component of mitochondrial inner membrane;	Q6NKU9.1(53.8);Q94EH2.1(53.1);Q38820.1(22.4);	Mitochondrial import inner membrane translocase subunit TIM22;Mitochondrial inner membrane translocase complex, subunit Tim23;	P-P-bond-hydrolysis-driven protein transmembrane transporter activity;TIM22 mitochondrial import inner membrane insertion complex;TIM23 mitochondrial import inner membrane translocase complex;chloroplast;chloroplast envelope;chloroplast outer membrane;integral component of membrane;integral component of mitochondrial inner membrane;mitochondrial inner membrane;mitochondrion;protein homodimerizati…
B3H7A6.1	Homologous	132	0.681018	33.3795	0.017051	Q3E9W6.1(233.4);B3H730.1(188.7);O23020.1(91.2);Q9FMQ4.1(73.6);P0DN93.1(65.9);P0DN92.1(39.6);F2Q9V4.2(37.3);Q9FI83.1(34.7);	S-protein homolog 19	extracellular region;rejection of self pollen;	Q9FJ04.1(31.0);	Plant self-incompatibility S1;	extracellular region;rejection of self pollen;
Q96273.1	Homologous	97	1.37953	25.401	0.01577	Q39138.1(61.8);	Late embryogenesis abundant protein 18	cytosol;response to osmotic stress;response to water deprivation;embryo development ending in seed dormancy;seed development;pollen tube development;	Q9FG31.1(15.0);	Late embryogenesis abundant protein, LEA_1 subgroup;	cytosol;embryo development ending in seed dormancy;response to cold;response to osmotic stress;response to water deprivation;seed development;
Q9M3D2.1	Homologous	123	0.505775	35.126	0.015008	Q9SF53.1(208.0);Q9LZ41.1(205.5);O80626.1(204.8);	60S ribosomal protein L35-3	maturation of LSU-rRNA from tricistronic rRNA transcript (SSU-rRNA, 5.8S rRNA, LSU-rRNA);mRNA binding;structural constituent of ribosome;translation;cytosolic large ribosomal subunit;	Q9FJP3.1(18.9);	Ribosomal protein L29/L35;Ribosomal protein L29/L35 superfamily;	chloroplast;chloroplast envelope;chloroplast nucleoid;chloroplast stroma;plastid;ribosome;structural constituent of ribosome;translation;
O80626.1	Homologous	123	0.505775	33.6415	0.012991	Q9LZ41.1(212.0);Q9SF53.1(208.2);Q9M3D2.1(204.7);	60S ribosomal protein L35-2	maturation of LSU-rRNA from tricistronic rRNA transcript (SSU-rRNA, 5.8S rRNA, LSU-rRNA);mRNA binding;structural constituent of ribosome;Golgi apparatus;translation;cytosolic large ribosomal subunit;cytosolic ribosome;	Q9FJP3.1(18.9);	Ribosomal protein L29/L35;Ribosomal protein L29/L35 superfamily;	chloroplast;chloroplast envelope;chloroplast nucleoid;chloroplast stroma;plastid;ribosome;structural constituent of ribosome;translation;
P49690.3	Homologous	140	0.686613	29.3071	0.011537	P56792.1(54.1);	60S ribosomal protein L23	structural constituent of ribosome;extracellular region;nucleolus;endoplasmic reticulum;cytosol;translation;cytosolic large ribosomal subunit;large ribosomal subunit rRNA binding;	Q84JG5.1(63.2);	Ribosomal protein L14 superfamily;Ribosomal protein L14P;Ribosomal protein L14P, conserved site;	embryo sac development;integument development;large ribosomal subunit rRNA binding;mitochondrial large ribosomal subunit;mitochondrion;negative regulation of cell death;plant ovule development;response to brassinosteroid;structural constituent of ribosome;translation;
Q3E9W6.1	Homologous	135	0.560177	26.4163	0.007079	B3H7A6.1(232.3);B3H730.1(211.4);O23020.1(90.2);Q9FMQ4.1(79.6);P0DN93.1(66.7);P0DN92.1(42.1);F2Q9V4.2(40.2);Q9FI83.1(37.6);	S-protein homolog 20	extracellular region;rejection of self pollen;	Q9FJ04.1(31.0);	Plant self-incompatibility S1;	extracellular region;rejection of self pollen;
Q9SY09.1	Homologous	116	2.53691	1.77414	0.002759	Q9SSF1.1(204.9);Q9LM92.1(50.3);Q9S7E6.1(46.3);F4K4E3.1(38.0);	Small nuclear ribonucleoprotein SmD1b	commitment complex;spliceosomal snRNP assembly;RNA binding;mRNA binding;U5 snRNP;U1 snRNP;U2 snRNP;U4 snRNP;U12-type spliceosomal complex;nucleolus;vacuolar membrane;RNA splicing;nuclear speck;pICln-Sm protein complex;SMN-Sm protein complex;posttranscriptional gene silencing by RNA;regulation of RNA splicing;precatalytic spliceosome;catalytic step 2 spliceosome;spliceosomal tri-snRNP complex;	Q9ZVN4.1(12.1);	Atypical dual-specificity phosphatase Siw14-like;Atypical dual-specificity phosphatase Siw14-like, plant and fungi;Protein-tyrosine phosphatase, active site;Protein-tyrosine phosphatase-like;	cytoplasm;phosphatase activity;protein tyrosine phosphatase activity;
