# Supplementary material
Source: publisher figshare collection journal article supplement (https://gsajournals.figshare.com/ndownloader/files/22752644)
Supplement: Supplementary file 1 [file 22752644 › Supplementary_information_2_All_cmiPs.xlsx]

## Sheet: rice_cmips
ACCESSION_NAME	MIP_TYPE	LENGTH	SCORE	INSTABILITY_INDEX	INSTABILITY*SCORE	HOMOLOGUES	DESCRIPTION	INTERPRO_DOMAINS	GENE_ONTOLOGY	ANCESTORS	ANCESTOR_INTERPRO_DOMAINS	ANCESTOR_GO_DOMAINS
A0A0P0XV63.1	Single-copy	134	889.887	91.5478	797.441		ABC transporter domain-containing protein			Q8GU75.1(80.9);A0A0P0V3N1.1(79.7);B9FZ43.1(76.0);Q6YUU5.1(71.1);A0A0P0WQF3.1(70.9);B9F3S3.1(69.5);A0A0P0V6W6.1(68.9);Q8GU81.1(68.0);Q8GU64.1(64.4);Q7EZL2.1(64.3);	AAA+ ATPase domain;ABC transporter type 1, transmembrane domain;ABC transporter type 1, transmembrane domain superfamily;ABC transporter, conserved site;ABC transporter-like;P-loop containing nucleoside triphosphate hydrolase;Type I protein exporter;
A0A0P0X5D2.1	Homologous	75	874.698	84.664	710.7	Q0IML6.1(32.8);	Pkinase_Tyr domain-containing protein			A0A0P0YBU6.1(111.4);Q0DE32.2(109.6);Q67W58.1(109.0);Q6Z2V3.1(58.0);Q7XPL1.2(56.3);Q0DDD4.1(55.7);Q10RG4.1(54.8);Q337Y0.1(53.1);A0A0P0VJX9.1(52.0);	PB1 domain;Protein kinase domain;Protein kinase, ATP binding site;Protein kinase-like domain superfamily;Serine-threonine/tyrosine-protein kinase, catalytic domain;Serine/threonine-protein kinase CTR1;Serine/threonine-protein kinase, active site;
A0A0N7KNL2.1	Homologous	96	1020.13	76.1031	661.056	A0A0P0YCZ3.1(51.5);A0A0P0VGB8.1(44.8);A0A0P0Y4D1.1(34.4);	Protein kinase domain-containing protein	Protein kinase-like domain superfamily;Protein kinase domain;Serine-threonine/tyrosine-protein kinase, catalytic domain;		A0A0P0WF90.1(118.6);Q8LQN6.1(117.7);Q6F328.1(116.0);Q7Y1P1.1(115.9);Q7EZ33.1(115.8);Q0J9T7.1(115.3);A0A0P0WFH6.1(114.5);A0A0P0WF87.1(113.8);	Bulb-type lectin domain;Bulb-type lectin domain superfamily;Gnk2-homologous domain;Gnk2-homologous domain superfamily;PAN/Apple domain;Protein kinase domain;Protein kinase, ATP binding site;Protein kinase-like domain superfamily;S-locus glycoprotein domain;S-locus receptor kinase, C-terminal;S-receptor-like serine/threonine-protein kinase;Serine-threonine/tyrosine-protein kinase, catalytic domain…
A0A0P0Y859.1	Single-copy	106	832.799	80.5925	618.392		Methyltransferase	Putative S-adenosyl-L-methionine-dependent methyltransferase;S-adenosyl-L-methionine-dependent methyltransferase;		Q0IU48.2(119.8);Q0JH49.1(115.9);Q5Z5X8.1(110.0);Q5QLT2.1(93.0);Q6ATW5.1(90.6);Q8H8N4.1(79.1);Q65XH2.1(73.1);Q9AV02.1(69.9);Q941U5.1(68.5);Q653G1.1(64.4);	Putative S-adenosyl-L-methionine-dependent methyltransferase;S-adenosyl-L-methionine-dependent methyltransferase;Twin-arginine translocation pathway, signal sequence;
A0A0P0VZC8.1	Homologous	91	590.429	87.7484	504.851	A0A0P0VBW5.1(96.7);A0A0P0W7R6.1(45.7);	Os03g0413850 protein			A0A0P0XVD7.1(106.7);Q6K937.1(84.6);Q7XM95.1(74.7);Q10RY0.1(72.3);Q6K8E9.1(69.4);A0A0P0Y7Y6.1(62.3);A0A0P0V5S3.1(26.4);A0A0P0W5W4.1(20.4);	Casparian strip membrane protein domain;VWA-Hint protein, Vwaint domain;Zinc finger, C3HC4 RING-type;Zinc finger, RING-type;Zinc finger, RING/FYVE/PHD-type;von Willebrand factor A-like domain superfamily;von Willebrand factor, type A;
B9G3X4.1	Single-copy	124	762.988	74.571	467.197		Os09g0447825 protein			Q7XPV3.1(82.2);Q60EW9.1(81.8);Q7XKA3.2(77.1);Q69T22.2(75.0);Q5TKJ0.1(73.3);Q0JCF9.1(72.1);Q8H2Q5.1(71.8);Q6K6B6.1(70.6);Q6EUH5.1(58.5);Q7XID7.1(50.3);	C2 domain;C2 domain superfamily;Phosphoribosyltransferase C-terminal;
A0A0N7KCC6.1	Single-copy	101	933.899	70.0049	467.065		Pkinase_Tyr domain-containing protein	Protein kinase-like domain superfamily;Serine-threonine/tyrosine-protein kinase, catalytic domain;		Q9LGI5.1(118.1);A0A0P0Y2E2.1(98.6);Q6YUZ6.1(93.0);Q5QMC8.1(91.5);A0A0P0Y3G5.1(86.3);Q6K7X0.1(83.1);Q2R2D8.1(83.0);Q655V6.1(82.6);	Leucine rich repeat 4;Leucine-rich repeat;Leucine-rich repeat domain superfamily;Leucine-rich repeat, typical subtype;Leucine-rich repeat-containing N-terminal, plant-type;Protein kinase domain;Protein kinase, ATP binding site;Protein kinase-like domain superfamily;Serine-threonine/tyrosine-protein kinase, catalytic domain;Serine/threonine-protein kinase, active site;
A0A0P0VM47.1	Homologous	75	598.03	81.7027	456.413	A0A0P0XGA4.1(45.9);	SANT domain-containing protein	Homeobox-like domain superfamily;Myb-like transcription factor;SANT/Myb domain;		Q6ES55.1(119.4);Q75LP7.1(119.1);Q7X8X3.1(117.6);B9G9P9.1(117.5);Q6Z2J9.1(117.1);Q2QYC1.1(115.9);Q2RB26.1(115.8);Q9FP39.1(115.6);J9PDC7.1(115.3);Q0JK18.1(112.8);	Homeobox-like domain superfamily;Myb domain;Myb-like transcription factor;SANT/Myb domain;
A0A0P0WVL3.1	Single-copy	137	435.601	98.8387	412.533		Os06g0301201 protein			Q655V6.1(56.0);A0A0N7KMC1.1(39.1);A0A0P0XTU7.1(37.1);Q2R0X3.1(36.7);Q6H845.1(36.6);A3A397.1(34.9);Q2R0Y6.1(33.8);B9F819.1(33.6);Q5QMC8.1(33.5);Q53P83.1(33.4);	Leucine rich repeat 4;Leucine-rich repeat;Leucine-rich repeat domain superfamily;Leucine-rich repeat, typical subtype;Leucine-rich repeat-containing N-terminal, plant-type;Protein kinase domain;Protein kinase, ATP binding site;Protein kinase-like domain superfamily;Serine-threonine/tyrosine-protein kinase, catalytic domain;Serine/threonine-protein kinase, active site;
A0A0P0W8D1.1	Homologous	75	684.722	70.956	358.713	A0A0P0Y0I3.1(77.7);	Os04g0219550 protein			Q53P15.1(116.7);Q6YUT7.1(64.0);Q8W2U9.1(58.9);Q84ZM1.1(55.2);Q7XB93.1(52.2);Q652D6.1(47.9);Q9AYH9.2(43.6);Q2QV19.1(42.2);	Leucine-rich repeat;Leucine-rich repeat domain superfamily;NB-ARC;P-loop containing nucleoside triphosphate hydrolase;Rx, N-terminal;Virus X resistance protein-like, coiled-coil domain;
A0A0P0VBW5.1	Homologous	78	639.741	70.3936	326.165	A0A0P0VZC8.1(96.7);A0A0P0W7R6.1(39.9);	Os01g0909051 protein			A0A0P0XVD7.1(106.7);Q6K937.1(84.6);Q7XM95.1(74.7);Q10RY0.1(72.3);Q6K8E9.1(69.4);A0A0P0Y7Y6.1(62.3);A0A0P0V5S3.1(26.4);A0A0P0W5W4.1(20.4);	Casparian strip membrane protein domain;VWA-Hint protein, Vwaint domain;Zinc finger, C3HC4 RING-type;Zinc finger, RING-type;Zinc finger, RING/FYVE/PHD-type;von Willebrand factor A-like domain superfamily;von Willebrand factor, type A;
A0A0P0WCG4.1	Single-copy	112	349.145	93.7938	319.552		Os04g0503200 protein	Protein kinase-like domain superfamily;		P53684.2(62.4);P53682.2(49.2);Q9FXQ3.1(43.3);Q8LPZ7.1(41.9);Q6I5I8.1(41.4);Q0DYK7.1(40.5);Q6F3A6.1(40.3);Q84SL0.2(39.0);Q69IM9.1(37.1);	EF-Hand 1, calcium-binding site;EF-hand domain;EF-hand domain pair;Protein kinase domain;Protein kinase, ATP binding site;Protein kinase-like domain superfamily;Serine/threonine-protein kinase, active site;
C7IYH8.1	Single-copy	148	679.049	67.95	304.844		Os02g0318600 protein			Q8GU86.2(77.2);Q8GU89.1(58.3);Q7PC80.1(52.7);Q8GU87.3(51.1);Q8GU92.1(50.2);Q0JLC5.1(49.9);Q5Z9S8.1(49.1);Q6YW62.2(46.4);Q8GU88.1(42.3);Q7FMW4.1(39.3);	AAA+ ATPase domain;ABC transporter-like;ABC-2 type transporter;ABC-transporter N-terminal domain;ATP-binding cassette transporter, PDR-like subfamily G, domain 1;ATP-binding cassette transporter, PDR-like subfamily G, domain 2;P-loop containing nucleoside triphosphate hydrolase;Plant PDR ABC transporter associated;
A0A0P0W6N1.1	Homologous	47	639.494	68.534	296.352	A0A0P0W7C9.1(59.7);A0A0P0VH44.1(54.1);A0A0P0VH48.1(53.1);A0A0N7KEZ6.1(52.1);A0A0P0W9H3.1(42.6);Q0JNL7.1(39.0);Q6F332.3(38.8);Q0JNS6.2(38.7);A0A0P0VGE2.1(32.7);	Os04g0143932 protein			B9FKW9.1(99.9);Q6F3A6.1(96.1);Q6K968.1(95.2);Q7XSQ5.2(95.0);Q6I587.1(94.7);	EF-Hand 1, calcium-binding site;EF-hand domain;EF-hand domain pair;Protein kinase domain;Protein kinase, ATP binding site;Protein kinase-like domain superfamily;Serine/threonine-protein kinase, active site;
A0A0P0WH32.1	Single-copy	139	404.708	79.4705	291.601		Os04g0693300 protein			Q9FTG6.1(85.1);Q656J6.1(61.0);Q0DIJ5.1(45.9);B9FGJ2.1(45.0);Q0DL71.2(44.3);G9I8W9.1(41.6);Q8S1S3.1(40.5);Q8H8V7.1(39.1);Q6YW62.2(25.9);Q8GU85.2(23.1);	AAA+ ATPase domain;ABC transporter, conserved site;ABC transporter-like;ABC-2 type transporter;ABC-transporter N-terminal domain;ATP-binding cassette transporter, PDR-like subfamily G, domain 1;ATP-binding cassette transporter, PDR-like subfamily G, domain 2;P-loop containing nucleoside triphosphate hydrolase;Plant PDR ABC transporter associated;
Q0IML6.1	Homologous	75	874.698	61.852	268.417	A0A0P0X5D2.1(33.1);	Pkinase_Tyr domain-containing protein			A0A0P0YBU6.1(111.4);Q0DE32.2(109.6);Q67W58.1(109.0);Q6Z2V3.1(58.0);Q7XPL1.2(56.3);Q0DDD4.1(55.7);Q10RG4.1(54.8);Q337Y0.1(53.1);A0A0P0VJX9.1(52.0);	PB1 domain;Protein kinase domain;Protein kinase, ATP binding site;Protein kinase-like domain superfamily;Serine-threonine/tyrosine-protein kinase, catalytic domain;Serine/threonine-protein kinase CTR1;Serine/threonine-protein kinase, active site;
C0L8H3.1	Homologous	99	855.48	61.9061	263.505	Q5VNU7.1(45.5);	Lipoxygenase domain-containing protein			Q7G794.1(119.1);Q6H7Q6.1(113.4);Q0DJB6.1(91.0);Q0IS17.1(84.9);Q7XV13.2(79.8);P38419.2(79.7);Q84YK8.1(78.3);Q8H016.2(62.0);Q2QY04.1(10.9);	Lipoxigenase, C-terminal domain superfamily;Lipoxygenase;Lipoxygenase, C-terminal;Lipoxygenase, conserved site;Lipoxygenase, domain 3;Lipoxygenase, iron binding site;Lipoxygenase, plant;PLAT/LH2 domain;PLAT/LH2 domain superfamily;Plant lipoxygenase, PLAT/LH2 domain;TAP42/TAP46-like superfamily;TAP46-like protein;
A0A0P0UX31.1	Single-copy	88	575.038	68.3091	263.268		Kinesin motor domain-containing protein			Q9AWM8.1(94.9);Q6Z9D2.2(75.2);Q651Z7.1(74.5);Q7X7H4.2(74.3);Q6H638.1(67.7);Q9FW70.2(50.9);	Kinesin motor domain;Kinesin motor domain superfamily;Kinesin motor domain, conserved site;Kinesin-like protein;NPK1-activating kinesin-like protein, C-terminal;P-loop containing nucleoside triphosphate hydrolase;Zinc finger, RING-type;Zinc finger, RING/FYVE/PHD-type;
A0A0N7KIG3.1	Homologous	71	559.915	68.7044	261.847	A0A0P0V2A4.1(46.3);Q0JN60.1(46.2);A0A0P0VD47.1(40.5);	PEROXIDASE_4 domain-containing protein	Haem peroxidase;Haem peroxidase superfamily;Peroxidase, active site;		Q9AS12.1(109.1);Q5U1S8.1(101.5);Q654S1.1(100.2);Q75IS1.1(93.1);Q94DM2.1(86.0);Q8LMR6.1(82.6);Q8W2X2.1(81.3);Q5JMS4.1(79.8);	Haem peroxidase;Haem peroxidase superfamily;Peroxidase, active site;Peroxidases heam-ligand binding site;Plant peroxidase;Secretory peroxidase;Twin-arginine translocation pathway, signal sequence;
A0A0P0X1S0.1	Single-copy	115	393.893	76.5661	259.378		Plastocyanin-like domain-containing protein	Multicopper oxidase, type 2;Cupredoxin;		Q655H5.1(83.7);Q7XSQ1.2(74.9);Q942J6.1(68.7);Q655L8.1(66.9);Q9LX04.1(65.0);Q84ZL7.1(59.9);Q0J0J1.1(18.0);Q2QZ80.1(17.2);Q0DHL5.2(17.2);	Ascorbate oxidase homologue, first cupredoxin domain;Cupredoxin;L-ascorbate oxidase, plants;Laccase;Laccase, first cupredoxin domain;Laccase, second cupredoxin domain;Laccase, third cupredoxin domain;Multicopper oxidase, copper-binding site;Multicopper oxidase, type 1;Multicopper oxidase, type 2;Multicopper oxidase, type 3;Multicopper oxidases, conserved site;
A0A0P0UYI3.1	Homologous	126	466.425	71.7833	253.953	C7J989.1(37.6);Q0JB93.1(37.5);	Os01g0133900 protein			Q7XHW7.1(106.7);Q10LW3.1(104.8);Q5ZBN0.1(99.4);Q75GM0.1(94.7);Q8H811.1(92.2);Q6MWE1.1(91.4);	Leucine-rich repeat;Leucine-rich repeat domain superfamily;Leucine-rich repeat, typical subtype;Leucine-rich repeat-containing N-terminal, plant-type;Protein kinase domain;Protein kinase, ATP binding site;Protein kinase-like domain superfamily;
A0A0P0XHB1.1	Single-copy	90	246.184	110.444	241.946		Os08g0486933 protein			Q2QLL1.1(49.7);Q0ILL8.1(29.7);Q6AVV6.1(21.0);Q6Z4I4.1(20.7);Q5Z6P7.1(17.8);A0A0P0XQZ1.1(17.6);Q0DTN6.1(17.6);Q0IZB5.1(17.5);Q339C7.1(17.2);	MFS transporter superfamily;PTR2 family proton/oligopeptide symporter, conserved site;Proton-dependent oligopeptide transporter family;
A0A0P0W2X2.1	Homologous	147	566.239	66.9687	240.534	A0A0P0Y785.1(34.6);	Os03g0741950 protein	Leucine-rich repeat domain superfamily;		Q8H609.1(116.7);Q2R2F1.1(115.6);A0A0P0Y1X0.1(115.5);A0A0P0UYE3.1(115.2);A0A0P0Y814.1(114.7);B7ECP2.1(113.9);A0A0N7KNE6.1(113.4);	Leucine-rich repeat;Leucine-rich repeat domain superfamily;Leucine-rich repeat, typical subtype;Leucine-rich repeat-containing N-terminal, plant-type;Protein kinase domain;Protein kinase, ATP binding site;Protein kinase-like domain superfamily;Serine/threonine-protein kinase, active site;
A0A0P0XVR1.1	Single-copy	93	381.582	75.1688	239.03		Os10g0481100 protein	Aquaporin-like;Aquaporin transporter;Major intrinsic protein;		Q8GRI8.1(119.2);Q8GRT8.1(115.2);Q7XUA6.1(111.7);Q8H5N9.1(109.6);Q6K215.1(105.2);Q7XLR1.2(101.6);Q651D5.2(92.7);Q7Y1E6.1(86.6);Q6EU94.1(82.1);Q7XSQ9.3(75.7);	Aquaporin transporter;Aquaporin-like;Major intrinsic protein;Major intrinsic protein, conserved site;
A0A0P0WIZ2.1	Single-copy	98	256.058	93.5633	233.892		Os05g0201900 protein			Q69XK5.1(76.0);Q5JN63.1(22.1);Q9AV71.1(21.3);Q69P51.1(17.1);Q6YVM4.1(17.0);Q8W3F9.1(16.1);Q9LHZ7.1(16.0);	Cellulose synthase;Cellulose synthase, RING-type zinc finger;Nucleotide-diphospho-sugar transferases;Zinc finger, RING-type;Zinc finger, RING/FYVE/PHD-type;
B9G5F5.1	Single-copy	101	242.742	100.25	231.501		Os10g0374300 protein	Protein of unknown function DUF1677, Oryza sativa;		Q6YX78.1(101.6);Q6Z2Z2.1(51.9);Q6YXV4.1(49.4);Q6Z2Y4.1(49.1);Q6Z2Z1.1(47.4);Q6YXV7.1(44.8);Q0E436.1(44.8);Q0D638.1(41.3);	Protein of unknown function DUF1677, Oryza sativa;
B9FJP0.1	Single-copy	132	309.047	79.878	225.188		Apple domain-containing protein	PAN/Apple domain;		A0A0P0UZX5.1(86.2);A0A0N7KDE3.1(37.9);Q5ZBQ1.1(34.9);Q5N9Y5.1(32.5);Q7XMH0.1(32.3);Q8LQH1.1(29.7);Q6ZF83.1(29.0);Q7XUM4.1(28.6);	Bulb-type lectin domain;Bulb-type lectin domain superfamily;PAN/Apple domain;Protein kinase domain;Protein kinase, ATP binding site;Protein kinase-like domain superfamily;S-locus glycoprotein domain;S-locus-specific glycoprotein/EP1;S-receptor-like serine/threonine-protein kinase;Serine/threonine-protein kinase, active site;
A0A0P0VT24.1	Homologous	97	905.474	58.4103	216.277	A0A0N7KPJ0.1(74.3);Q6Z8F9.1(47.8);	DYW_deaminase domain-containing protein			C7JA50.1(119.0);A0A0P0XPC3.1(119.0);Q10BI4.1(118.2);Q8H8N2.1(117.1);Q0IZE8.1(116.0);Q84TA9.1(115.3);Q5ZDP1.1(115.0);Q6ETD1.1(114.9);	DYW domain;Pentatricopeptide repeat;Tetratricopeptide-like helical domain superfamily;
A0A0P0VGY9.1	Homologous	113	330.796	75.8035	212.089	A0A0P0W449.1(40.9);	Os02g0237801 protein			Q852M2.1(71.5);Q852M1.1(70.2);Q7XH05.1(51.4);Q6Z351.1(43.4);	2Fe-2S ferredoxin, iron-sulphur binding site;2Fe-2S ferredoxin-like superfamily;2Fe-2S ferredoxin-type iron-sulfur binding domain;Aldehyde oxidase/xanthine dehydrogenase;Aldehyde oxidase/xanthine dehydrogenase, a/b hammerhead;Aldehyde oxidase/xanthine dehydrogenase, a/b hammerhead superfamily;Aldehyde oxidase/xanthine dehydrogenase, molybdopterin binding;Aldehyde oxidase/xanthine dehydrogenase, m…
A0A0P0X0P2.1	Homologous	87	431.475	69.5402	210.779	A0A0P0VHK4.1(35.9);A0A0P0WW43.1(32.9);	XET_C domain-containing protein			Q5Z6H3.1(113.8);Q5Z6G7.1(111.9);Q5Z6H0.1(100.8);Q0JAD6.1(98.4);Q2R336.1(94.9);Q7XTP9.2(91.3);A0A0N7KPI2.1(90.9);A0A0P0XEA0.1(90.9);Q7XNY6.1(90.0);A3AX59.1(88.0);	Beta-glucanase;Concanavalin A-like lectin/glucanase domain superfamily;Glycoside hydrolase family 16;Glycoside hydrolase, family 16, active site;Xyloglucan endo-transglycosylase, C-terminal;Xyloglucan endotransglucosylase/hydrolase;
A0A0P0XC58.1	Single-copy	102	233.602	92.1186	210.548		Os08g0165501 protein	Protein of unknown function DUF604;		Q10SF6.1(82.6);Q8LN26.1(63.6);Q6EPN2.1(56.6);Q7XQ75.1(53.9);Q6ZJW6.1(17.8);	Protein of unknown function DUF604;
A0A0P0VZV1.1	Single-copy	80	229.454	92.9425	208.436		Os03g0588950 protein			Q0DIV1.1(31.6);B7F956.1(25.1);Q5N7Z8.1(24.4);A0A0P0V0F6.1(23.6);A0A0P0WUZ0.1(17.9);Q68Y41.1(17.8);Q6ZD83.1(16.2);Q6ZJM5.1(15.8);Q6Z9D5.1(15.4);	Cytochrome P450;Cytochrome P450 superfamily;Cytochrome P450, E-class, group I;Cytochrome P450, conserved site;
A0A0P0YAQ7.1	Single-copy	90	278.026	80.5033	205.972		Os12g0533100 protein			A0A0P0XQJ7.1(54.1);A0A0P0XQ91.1(25.9);A0A0P0XQ32.1(25.6);Q7Y1P1.1(23.1);A0A0N7KR84.1(22.8);Q7XQT8.2(22.7);A0A0P0XRC3.1(22.6);A0A0N7KJS0.1(22.5);	Bulb-type lectin domain;Bulb-type lectin domain superfamily;EGF-like domain;PAN/Apple domain;Protein kinase domain;Protein kinase, ATP binding site;Protein kinase-like domain superfamily;S-locus glycoprotein domain;S-receptor-like serine/threonine-protein kinase;Serine-threonine/tyrosine-protein kinase, catalytic domain;Serine/threonine-protein kinase, active site;
A0A0P0XT38.1	Homologous	116	220.094	89.7638	193.307	Q652S6.1(76.7);	HTH myb-type domain-containing protein	Homeobox-like domain superfamily;Myb-like transcription factor;Myb domain;SANT/Myb domain;		Q6Z5L1.1(84.9);Q0J3I9.1(56.0);A0A0P0Y8F4.1(53.0);Q0JHU7.1(52.7);A0A0N7KRM8.1(50.3);Q67WF6.1(49.6);Q6ZHS5.1(48.7);Q84SF0.1(46.0);A0A0P0VAQ0.1(42.5);	Homeobox-like domain superfamily;Myb domain;Myb-like domain;Myb-like transcription factor;SANT/Myb domain;
A0A0P0W4V3.1	Single-copy	28	205.969	94.0107	188.854		Os03g0797300 protein			Q7Y1J1.1(41.2);Q7Y1I9.1(38.9);Q7Y1H9.1(34.8);Q6ZL61.1(29.5);	Aldolase-type TIM barrel;Ribulose-phosphate binding barrel;Tryptophan synthase, alpha chain;Tryptophan synthase, alpha chain, active site;
A0A0P0X441.1	Single-copy	71	219.445	88.0056	188.332		Os07g0234900 protein	Protein of unknown function DUF1677, Oryza sativa;		Q8GRW9.1(94.5);Q10PF3.1(29.5);Q2QLX8.1(21.7);A0A0P0VJH1.1(20.1);Q8H3Z2.1(17.9);A0A0P0VUL6.1(13.9);A0A0N7KHP3.1(12.9);	Adenylyl-sulfate kinase;P-loop containing nucleoside triphosphate hydrolase;Protein of unknown function DUF1677, Oryza sativa;Quinoprotein amine dehydrogenase, beta chain-like;
A0A0P0WCS3.1	Single-copy	99	286.284	76.4303	187.641		Os04g0528000 protein			Q8LNT2.1(94.0);Q5ZC54.1(74.7);Q656E5.1(73.9);Q5QND0.1(73.4);B9FWE5.1(71.8);Q10B37.1(39.3);B9FDA0.1(38.1);	Protein of unknown function DUF789;
A0A0P0WDN5.1	Homologous	74	293.563	75.6135	186.93	Q0IYZ2.1(37.2);	Os04g0576600 protein	Osmotin/thaumatin-like superfamily;Thaumatin family;		Q10P75.1(102.2);Q69JY6.1(68.8);Q10P77.1(64.5);Q69JY8.1(56.0);A0A0P0VV61.1(54.8);Q7F267.1(51.6);Q654Y4.1(49.8);	Osmotin/thaumatin-like superfamily;Thaumatin family;Thaumatin, conserved site;
A0A0P0WPQ2.1	Single-copy	84	240.267	81.9583	184.473		Os05g0521400 protein	F-box-like domain superfamily;		Q6Z7F7.1(62.0);Q5SNM6.1(34.6);A0A0P0WTL0.1(33.2);A0A0P0X4I7.1(32.5);Q7XC13.1(26.0);A0A0P0WVT0.1(23.0);	F-box associated domain, type 3;F-box associated interaction domain;F-box domain;F-box-like domain superfamily;Fumarate lyase, conserved site;
A0A0P0YB18.1	Single-copy	149	207.382	90.8591	184.471		Os12g0542300 protein			Q10EK0.1(78.4);Q0J9Q5.1(32.7);Q7EZR6.1(31.8);Q5ZCG0.1(31.5);Q2RBA9.1(26.3);Q2QM90.2(26.3);Q2QYI7.1(25.5);	BTB/POZ domain;NPH3 domain;SKP1/BTB/POZ domain superfamily;
A0A0P0X7T6.1	Homologous	103	930.796	55.7058	179.82	C7J989.1(38.9);A0A0P0WTA9.1(35.2);A0A0P0XRU9.1(32.7);A0A0P0X7E8.1(30.2);	Protein kinase domain-containing protein			Q6EUQ1.1(112.2);Q2R2P4.1(111.5);Q8GSC2.1(110.9);Q6YUU3.1(108.3);Q7XHL0.1(108.2);A0A0P0XT91.1(107.9);Q0D5R2.1(106.4);A0A0N7KCU3.1(104.8);Q7F1L6.1(104.8);	Gnk2-homologous domain;Gnk2-homologous domain superfamily;Leucine-rich repeat;Leucine-rich repeat domain superfamily;Leucine-rich repeat, typical subtype;Leucine-rich repeat-containing N-terminal, plant-type;Protein kinase domain;Protein kinase, ATP binding site;Protein kinase-like domain superfamily;Serine-threonine/tyrosine-protein kinase, catalytic domain;Serine/threonine-protein kinase, activ…
A0A0P0XS29.1	Single-copy	117	186.823	97.7154	175.822		Os10g0169400 protein			Q8LRC7.1(112.4);Q6EUK7.1(32.6);A0A0P0XFL3.1(25.2);Q6H4P2.1(22.3);	Armadillo;Armadillo-like helical;Armadillo-type fold;U box domain;Zinc finger, RING/FYVE/PHD-type;
A0A0P0VHS8.1	Single-copy	95	213.197	83.4632	169.177		Os02g0289500 protein			Q6K714.1(64.7);A0A0P0VJ33.1(33.5);Q6K2J2.1(33.3);Q7X7V6.2(32.6);Q6K807.1(24.4);Q5VP60.1(20.4);Q6YYV8.1(18.6);Q5VP55.1(17.1);	Chloramphenicol acetyltransferase-like domain superfamily;Transferase;
Q6K9T0.1	Homologous	131	542.836	61.9405	167.602	Q2HWH1.1(178.4);Q6H468.1(177.1);Q2HWG1.1(119.0);Q2HWG0.1(118.1);Q8GVV6.1(114.1);Q7XN30.2(32.1);	Two-component response regulator ORR3	CheY-like superfamily;Signal transduction response regulator, receiver domain;		Q10N34.1(80.4);Q0D3B6.1(80.0);Q689G6.1(75.7);Q5N6V8.2(73.0);Q5SML5.1(72.1);Q8H7S7.1(68.2);Q6K8X6.1(67.9);Q6H805.1(66.6);Q67W50.1(66.3);	CCT domain;CheY-like superfamily;Homeobox-like domain superfamily;Myb domain;Myb domain, plants;Response regulator B-type, plant;SANT/Myb domain;Signal transduction response regulator, receiver domain;
Q6ER22.1	Homologous	113	274.375	73.7106	162.352	Q2RB28.1(69.8);B9GBM3.1(67.9);Q0J5F8.2(67.5);	Mini zinc finger protein 2	ZF-HD homeobox protein, Cys/His-rich dimerisation domain;		Q688U3.1(99.0);Q6YXH5.1(95.5);Q6ZB90.1(91.4);Q2QW44.3(88.6);Q8S3Q9.1(86.3);Q6Z528.1(84.5);Q53N87.2(82.3);Q6ER21.2(79.4);Q5VM82.1(74.9);Q10DV5.1(65.0);	Homeobox domain;Homeobox-like domain superfamily;Homeodomain, ZF-HD class;ZF-HD homeobox protein, Cys/His-rich dimerisation domain;
A0A0N7KIV4.1	Single-copy	98	404.075	65.8817	161.013		Terpene_synth_C domain-containing protein			A0A0P0W963.1(116.8);A0A0P0W9G0.1(108.7);A0A0P0VY91.1(94.0);A0A0P0VYI4.1(90.3);A0F0B7.1(74.0);	Isoprenoid synthase domain superfamily;Terpene cyclase-like 1, C-terminal domain;Terpene synthase, N-terminal domain;Terpene synthase, N-terminal domain superfamily;Terpene synthase, metal-binding domain;Terpenoid cyclases/protein prenyltransferase alpha-alpha toroid;
A0A0P0UXH8.1	Single-copy	111	269.47	73.6027	158.746		Os01g0115751 protein			Q5ZE77.1(110.5);A0A0P0UX91.1(96.1);Q657F3.1(76.8);	Protein kinase domain;Protein kinase, ATP binding site;Protein kinase-like domain superfamily;Serine/threonine-protein kinase, active site;Wall-associated receptor kinase, galacturonan-binding domain;
A0A0P0Y660.1	Homologous	86	253.69	75.057	158.251	B9G3X6.1(36.5);	Neprosin_AP domain-containing protein	Neprosin activation peptide;		Q69Y39.1(43.9);A0A0P0WIV0.1(40.8);Q6ZIY2.1(36.8);A0A0N7KEH6.1(36.6);Q6ZL19.1(36.0);Q84M37.1(33.8);Q5JK80.1(33.4);Q0J3L1.1(22.1);	Neprosin;Neprosin activation peptide;
A0A0P0Y5Y3.1	Single-copy	129	687.335	57.9047	157.939		Os11g0689400 protein			Q5N7W4.2(111.3);Q6YS30.1(84.9);Q0E2Z7.2(83.9);A0A0P0XCD9.1(83.8);Q0J7Y8.2(83.0);Q0DB53.2(81.3);Q10MH8.1(81.3);Q53RK8.1(79.7);Q84UQ1.1(77.7);Q0E3X4.2(65.5);	ATP-dependent RNA helicase DEAD-box, conserved site;DEAD/DEAH box helicase domain;Helicase superfamily 1/2, ATP-binding domain;Helicase, C-terminal;P-loop containing nucleoside triphosphate hydrolase;RNA helicase, DEAD-box type, Q motif;Zinc finger, CCHC-type;Zinc finger, CCHC-type superfamily;Zinc finger, HIT-type;
A0A0P0XZG4.1	Homologous	126	1203.65	51.081	157.711	A0A0N7KSI1.1(114.6);A0A0P0Y3H3.1(65.8);A0A0P0WY54.1(47.4);A0A0P0WTA9.1(34.7);	Pkinase_Tyr domain-containing protein	Protein kinase-like domain superfamily;Serine-threonine/tyrosine-protein kinase, catalytic domain;		Q69KC4.1(120.0);Q2R0X3.1(119.5);A0A0N7KEX1.1(118.1);A0A0P0WYI2.1(117.8);A3BD37.1(117.0);Q2R2D5.1(116.5);B9FTY2.1(116.4);Q9LGI5.1(114.7);Q5VPA8.1(114.4);	Leucine rich repeat 4;Leucine-rich repeat;Leucine-rich repeat domain superfamily;Leucine-rich repeat, typical subtype;Leucine-rich repeat-containing N-terminal, plant-type;Protein kinase domain;Protein kinase, ATP binding site;Protein kinase-like domain superfamily;Serine-threonine/tyrosine-protein kinase, catalytic domain;Serine/threonine-protein kinase, active site;
A0A0P0W0H8.1	Single-copy	98	231.499	77.5408	157.435		Os03g0591900 protein			Q67WW1.1(38.2);Q6ZIH6.1(28.9);A0A0P0WZ65.1(28.1);Q6ZII0.1(26.3);Q6ZIG1.1(26.0);Q6ZIH2.1(26.0);A0A0P0V315.1(25.7);Q6ZIG2.1(25.3);Q75KW3.1(24.4);	Cytochrome P450;Cytochrome P450 superfamily;Cytochrome P450, E-class, group I;Cytochrome P450, conserved site;
A0A0P0V5S9.1	Single-copy	84	874.879	54.8262	157.345		Os01g0642801 protein			A0A0P0VBE8.1(94.7);A0A0N7KKS6.1(91.1);Q6ZF83.1(84.9);Q7XQX5.1(78.7);Q7XMR2.2(78.6);Q8LMB0.1(75.7);Q7XUM4.1(75.7);Q8LQH1.1(75.5);Q943Q1.1(74.5);	Bulb-type lectin domain;Bulb-type lectin domain superfamily;PAN/Apple domain;Protein kinase domain;Protein kinase, ATP binding site;Protein kinase-like domain superfamily;S-locus glycoprotein domain;S-receptor-like serine/threonine-protein kinase;Serine/threonine-protein kinase, active site;
A0A0P0YAI3.1	Single-copy	96	270.548	73.1708	156.543		Rx_N domain-containing protein	Rx, N-terminal;		Q53RK5.1(57.5);Q651T2.1(27.6);Q84QL4.1(25.1);A0A0P0V3N2.1(24.3);Q9MBF2.1(23.8);Q2QRB9.1(23.3);A0A0N7KLL0.1(23.0);Q9LWW7.1(22.4);	Leucine-rich repeat domain superfamily;NB-ARC;P-loop containing nucleoside triphosphate hydrolase;Rx, N-terminal;Virus X resistance protein-like, coiled-coil domain;
A0A0P0VJN9.1	Homologous	74	428.271	63.8311	150.104	A0A0P0XWZ4.1(50.4);	Os02g0517150 protein	Fringe-like;		Q10NG1.1(79.0);A0A0P0VVX1.1(65.3);Q10SF6.1(58.7);Q7XQ75.1(55.7);Q6EPN2.1(54.9);Q8LN26.1(52.9);A0A0P0XX76.1(44.2);Q6ZJW6.1(21.7);	Protein of unknown function DUF604;
A0A0N7KTR0.1	Homologous	76	336.79	67.5697	148.033	Q0IRM2.1(34.1);	Os12g0210000 protein			B9FES9.1(75.7);B9GCC0.1(75.1);Q6K655.1(73.7);Q2QPZ2.1(45.7);	Leucine-rich repeat domain superfamily;NB-ARC;P-loop containing nucleoside triphosphate hydrolase;Rx, N-terminal;
Q650U2.1	Homologous	116	187.858	83.0862	147.897	Q2QXM2.1(41.1);Q0JDE1.1(31.9);Q6H751.1(30.7);	Os09g0520500 protein	Protein LITTLE ZIPPER;		Q2QM96.1(32.5);Q6TAQ6.1(29.8);Q6AST1.1(28.4);Q9AV49.1(26.8);Q84NC5.2(18.6);Q5QMZ9.2(15.5);Q6K498.1(12.5);Q0JNL3.1(12.0);Q5Z6F6.1(11.3);	Basic-leucine zipper domain;Helix-turn-helix motif;Homeobox domain;Homeobox, conserved site;Homeobox-like domain superfamily;Leucine zipper, homeobox-associated;MADS MEF2-like;MEKHLA;START domain;START-like domain superfamily;Transcription factor TGA like domain;Transcription factor, K-box;Transcription factor, MADS-box;Transcription factor, MADS-box superfamily;
A0A0P0VVB0.1	Single-copy	107	201.597	79.5113	145.42		HALZ domain-containing protein			Q7G737.1(72.1);Q7XC54.1(66.1);Q0JB92.1(65.8);Q67UE2.1(63.9);Q5VPE3.1(60.2);Q6YPD0.1(58.7);Q5Z6F6.1(55.5);Q0JKX1.1(54.5);Q5VPE5.1(47.1);Q0E0A6.1(39.5);	HD-ZIP protein, N-terminal;Helix-turn-helix motif;Homeobox domain;Homeobox, conserved site;Homeobox-like domain superfamily;Leucine zipper, homeobox-associated;
A0A0P0XGN5.1	Single-copy	36	149.943	104.486	145.323		Os08g0455700 protein			Q69P90.1(49.7);Q6K647.1(23.1);Q7XVB9.2(19.1);	Cullin repeat-like-containing domain superfamily;Exocyst complex component Exo70;
Q0IR70.1	Single-copy	115	199.314	79.8722	145.208		Os11g0672200 protein			Q6F328.1(30.2);Q6ER42.1(29.4);B7EJR3.1(29.0);Q60EJ2.1(28.4);A0A0P0XRC1.1(28.4);Q0JIQ1.1(27.5);A0A0P0V3S2.1(27.2);	Bulb-type lectin domain;Bulb-type lectin domain superfamily;EGF-like domain;Gnk2-homologous domain;Gnk2-homologous domain superfamily;Leucine-rich repeat domain superfamily;PAN/Apple domain;Protein kinase domain;Protein kinase, ATP binding site;Protein kinase-like domain superfamily;S-locus glycoprotein domain;S-locus receptor kinase, C-terminal;S-receptor-like serine/threonine-protein kinase;Ser…
A0A0P0Y2C3.1	Homologous	92	237.999	74.3902	144.71	Q0JEC9.1(56.3);Q0ISZ5.1(48.6);	Os11g0439100 protein	NAD(P)-binding domain superfamily;Short-chain dehydrogenase/reductase SDR;		A0A0P0Y501.1(102.5);A0A0P0Y590.1(99.5);Q10NH4.1(95.5);Q10NH7.1(93.1);Q942W0.1(92.1);Q84JJ3.1(65.5);Q6ZF50.1(32.0);A0A0N7KN00.1(30.3);Q7XDQ8.1(29.9);Q69X86.1(29.8);	NAD(P)-binding domain superfamily;Short-chain dehydrogenase/reductase SDR;Short-chain dehydrogenase/reductase, conserved site;
A0A0P0V586.1	Single-copy	121	354.094	66.305	144.704		TPR_REGION domain-containing protein	Tetratricopeptide repeat-containing domain;Tetratricopeptide-like helical domain superfamily;Tetratricopeptide repeat;		Q5QNE5.1(118.6);Q6H660.1(103.9);A0A0P0VJ70.1(60.6);Q5WA76.1(53.1);Q0DL11.1(47.1);Q5VMW9.1(43.8);B9FDQ8.1(37.3);	Heat shock chaperonin-binding;O-GlcNAc transferase, C-terminal;Protein kinase domain;Protein kinase, ATP binding site;Protein kinase-like domain superfamily;RNA-polymerase II-associated protein 3-like, C-terminal domain;STI1 domain;Serine/threonine-protein kinase, active site;Tetratricopeptide repeat;Tetratricopeptide repeat 1;Tetratricopeptide repeat 2;Tetratricopeptide repeat-containing domain;…
A0A0P0WJM2.1	Single-copy	72	431.09	63.15	144.478		Os05g0239767 protein			Q7F8U2.1(81.0);Q69QR7.1(75.3);Q6Z661.1(37.6);Q6ZCZ7.1(34.2);Q5N8J4.1(33.2);A0A0P0VIJ6.1(26.2);Q65X38.1(25.0);Q6Z6I5.1(22.3);A0A0P0X5P6.1(16.2);	CRAL-TRIO lipid binding domain;CRAL-TRIO lipid binding domain superfamily;CRAL/TRIO, N-terminal domain;CRAL/TRIO, N-terminal domain superfamily;
A0A0P0W8A3.1	Single-copy	64	204.053	77.3703	138.01		Os04g0291000 protein			Q0JED2.1(48.8);A0A0P0XXH2.1(32.7);Q94LU0.1(29.6);Q0IZG6.1(27.9);Q53ML7.1(26.2);Q9LGI8.1(24.9);Q0IU69.1(23.4);	NAD(P)-binding domain superfamily;Short-chain dehydrogenase/reductase SDR;
C7IZ18.1	Single-copy	104	183.357	80.6038	136.191		Os02g0742050 protein			Q6Z7R3.1(117.1);A0A0P0XP28.1(15.9);	Bromo adjacent homology (BAH) domain;Osmotin/thaumatin-like superfamily;TFIIS/LEDGF domain superfamily;Thaumatin family;Thaumatin, conserved site;Transcription elongation factor, TFIIS/CRSP70, N-terminal, sub-type;Transcription factor IIS, N-terminal;
A0A0P0WTS0.1	Homologous	63	444.203	61.8162	135.974	A0A0P0WTI2.1(61.7);	Os06g0176850 protein			Q6ES21.1(95.5);Q8H618.1(91.1);Q8H620.1(85.0);Q9XIW9.1(49.0);Q7XR83.1(46.1);Q7XUN0.2(43.4);Q7XR84.1(40.5);Q942Y0.1(40.5);	Isopenicillin N synthase-like;Non-haem dioxygenase N-terminal domain;Oxoglutarate/iron-dependent dioxygenase;
A0A0P0VVI2.1	Single-copy	144	175.975	82.0639	135.441		Os03g0241001 protein	Homeobox-like domain superfamily;Myb domain, plants;		Q7Y0B7.1(75.4);Q7XIF1.1(73.6);Q5VRW2.2(62.6);Q6Z869.1(59.2);Q5Z811.1(38.0);Q6YXZ4.1(35.1);Q10LZ1.1(34.5);Q5Z5I4.1(32.3);Q94DH3.1(29.7);A0A0P0XY89.1(29.1);	Homeobox-like domain superfamily;MYB-CC type transcription factor, LHEQLE-containing domain;Myb domain;Myb domain, plants;SANT/Myb domain;
Q0J5F8.2	Homologous	124	220.445	74.1202	132.614	Q2RB28.1(87.1);B9GBM3.1(84.2);Q6ER22.1(75.5);	Mini zinc finger protein 4	ZF-HD homeobox protein, Cys/His-rich dimerisation domain;		Q688U3.1(99.0);Q6YXH5.1(95.5);Q6ZB90.1(91.4);Q2QW44.3(88.6);Q8S3Q9.1(86.3);Q6Z528.1(84.5);Q53N87.2(82.3);Q6ER21.2(79.4);Q5VM82.1(74.9);Q10DV5.1(65.0);	Homeobox domain;Homeobox-like domain superfamily;Homeodomain, ZF-HD class;ZF-HD homeobox protein, Cys/His-rich dimerisation domain;
A0A0P0Y252.1	Single-copy	95	270.462	69.1148	129.25		FAR1 domain-containing protein	FAR1 DNA binding domain;		C7J599.1(50.2);Q8H344.1(47.9);Q10QV7.1(40.4);A0A0P0W939.1(37.8);A0A0P0V1C5.1(37.7);	FAR1 DNA binding domain;FHY3/FAR1 family;MULE transposase domain;Zinc finger, GATA-type;Zinc finger, NHR/GATA-type;Zinc finger, PMZ-type;Zinc finger, SWIM-type;
Q6Z727.1	Homologous	147	345.774	64.5748	127.107	Q655G7.1(112.4);Q8LQQ2.1(97.0);Q8RYJ8.1(41.0);Q6F332.3(37.2);Q2QYW1.1(37.2);Q0JNL7.1(37.1);Q0JNS6.2(37.1);	EF-hand domain-containing protein	EF-hand domain pair;EF-Hand 1, calcium-binding site;EF-hand domain;		Q5VQQ5.1(118.1);Q6F3A6.1(117.9);Q53P85.1(115.8);Q2QX45.1(113.4);Q7XIM0.1(111.1);Q0DYK7.1(107.6);	EF-Hand 1, calcium-binding site;EF-hand domain;EF-hand domain pair;Protein kinase domain;Protein kinase, ATP binding site;Protein kinase-like domain superfamily;Serine/threonine-protein kinase, active site;
A0A0P0WMW0.1	Homologous	138	542.019	57.9601	125.08	Q6Z159.1(66.5);Q851N0.1(61.2);Q9AX11.1(48.3);B7F194.1(33.8);A0A0P0WEK1.1(32.3);	Inhibitor I9 domain-containing protein			Q0E256.1(94.6);A0A0P0VHD8.1(92.9);Q6EPJ5.1(92.2);A0A0P0W6P0.1(91.1);Q8RVA0.1(86.3);Q0JIK5.1(85.8);Q5ZBR8.1(81.1);Q7XT44.2(80.8);	Cucumisin-like catalytic domain;Peptidase S8 propeptide/proteinase inhibitor I9;Peptidase S8 propeptide/proteinase inhibitor I9 superfamily;Peptidase S8, subtilisin, His-active site;Peptidase S8, subtilisin, Ser-active site;Peptidase S8, subtilisin-related;Peptidase S8/S53 domain;Peptidase S8/S53 domain superfamily;Subtilisin-like protease, fibronectin type-III domain;
A0A0P0XGA4.1	Homologous	88	550.595	57.7295	124.819	A0A0P0VX49.1(56.6);A0A0P0YCS2.1(52.4);A0A0P0VM47.1(43.5);A0A0P0V076.1(43.0);Q2QYJ8.1(42.1);B9FCD6.1(40.4);Q10P69.1(40.4);A0A0P0YBD3.1(33.8);A0A0P0XAN8.1(32.5);	Os08g0433400 protein	Homeobox-like domain superfamily;Myb-like transcription factor;Myb domain;SANT/Myb domain;		Q6H7S0.1(120.0);Q0DH57.1(119.9);Q9FP39.1(119.3);J9PDC7.1(117.3);Q7F0R0.1(117.1);A3AWY9.1(116.4);Q0D6F7.1(115.8);A0A0P0WYS8.1(115.6);Q0JIC2.1(115.6);Q2QZJ8.1(115.3);	Homeobox-like domain superfamily;Myb domain;Myb-like domain;Myb-like transcription factor;SANT/Myb domain;Transcription factor GAMYB-like;
A0A0N7KPJ0.1	Homologous	104	858.785	52.1779	123.691	Q6Z8F9.1(75.5);A0A0P0VT24.1(74.2);	DYW_deaminase domain-containing protein			C7JA50.1(119.0);A0A0P0XPC3.1(119.0);Q10BI4.1(118.2);Q8H8N2.1(117.1);Q0IZE8.1(116.0);Q84TA9.1(115.3);Q5ZDP1.1(115.0);Q6ETD1.1(114.9);	DYW domain;Pentatricopeptide repeat;Tetratricopeptide-like helical domain superfamily;
A0A0P0XN39.1	Homologous	61	540.376	57.7016	122.239	A3CGM8.1(40.6);A0A0P0WWA7.1(35.1);	MADS-box domain-containing protein			Q9SAR1.1(119.1);Q9XJ66.1(117.7);Q2QQA3.2(116.2);Q944S9.2(115.0);A0A0P0VDS5.1(113.1);Q40702.1(112.3);Q655V4.1(112.0);Q5K4R0.3(111.0);A0A0P0WS55.1(106.7);	MADS MEF2-like;Transcription factor, K-box;Transcription factor, MADS-box;Transcription factor, MADS-box superfamily;
A0A0P0X9D8.1	Single-copy	131	212.535	73.0069	122.125		Homeobox domain-containing protein	Homeobox-like domain superfamily;Homeobox domain;		Q7Y0V9.2(28.9);Q6EPF0.1(25.7);Q69T58.2(25.2);Q6YWR4.1(22.1);A3BPF2.1(22.0);Q6ZAR0.1(21.9);Q7Y0V7.2(21.9);Q6ZA74.1(21.6);Q336P2.1(21.5);	Helix-turn-helix motif;Homeobox domain;Homeobox, conserved site;Homeobox-leucine zipper protein GLABRA2/ANL2/PDF2/ATML1-like;Homeobox-like domain superfamily;Leucine zipper, homeobox-associated;START domain;START-like domain superfamily;
A0A0P0WJZ9.1	Homologous	113	412.218	60.969	118.89	B7EDI5.1(140.4);A0A0P0WJU3.1(136.1);A0A0P0WEZ8.1(88.9);Q0J7D7.1(72.6);	Os05g0258200 protein			A0A0P0WET4.1(111.5);A0A0N7KJP8.1(94.1);Q6EUF7.1(40.7);A0A0P0WKH3.1(26.9);Q6EQG8.1(25.9);Q10LZ2.1(17.0);Q6EUQ1.1(15.0);A0A0P0Y0Y5.1(12.0);	Leucine-rich repeat;Leucine-rich repeat domain superfamily;Leucine-rich repeat, typical subtype;Leucine-rich repeat-containing N-terminal, plant-type;Malectin domain;Protein kinase domain;Protein kinase, ATP binding site;Protein kinase-like domain superfamily;Serine-threonine/tyrosine-protein kinase, catalytic domain;Serine/threonine-protein kinase, active site;
A0A0P0V932.1	Single-copy	133	433.146	60.1797	118.028		Os01g0784500 protein			Q8LQN6.1(93.5);Q60EJ2.1(51.4);Q0JIQ1.1(45.4);Q7Y1P1.1(41.7);A0A0P0X7Q1.1(39.0);Q84S65.1(38.9);Q7EZ33.1(38.0);Q654J4.1(36.8);Q6ZFY2.1(36.4);Q5ZAV5.1(32.2);	Bulb-type lectin domain;Bulb-type lectin domain superfamily;EGF-like domain;Gnk2-homologous domain;Gnk2-homologous domain superfamily;PAN/Apple domain;Protein kinase domain;Protein kinase, ATP binding site;Protein kinase-like domain superfamily;S-locus glycoprotein domain;S-locus receptor kinase, C-terminal;S-locus, receptor kinase;S-receptor-like serine/threonine-protein kinase;Serine-threonine/…
A0A0P0VFI9.1	Homologous	113	209.668	72.5133	117.939	A2ZQ01.1(94.6);A3BD90.1(91.1);Q7FAP3.1(83.5);Q5N9F0.1(69.4);	Os02g0173401 protein			Q67WW1.1(96.3);Q0DZS4.1(39.1);Q6ZIH6.1(33.0);Q6H763.1(31.6);A0A0P0VFT7.1(29.1);Q6ZIH2.1(28.8);Q6ZII0.1(27.8);A3A871.1(27.1);	Cytochrome P450;Cytochrome P450 superfamily;Cytochrome P450, E-class, group I;Cytochrome P450, conserved site;
A0A0P0WHY1.1	Single-copy	96	122.445	99.8156	116.536		Os05g0149600 protein			Q5ZC88.1(81.4);Q93VL5.1(25.1);	Cullin homology domain;Cullin homology domain superfamily;Cullin protein, neddylation domain;Cullin repeat-like-containing domain superfamily;Cullin, N-terminal;Cullin, conserved site;Winged helix DNA-binding domain superfamily;Winged helix-like DNA-binding domain superfamily;
A0A0P0XS34.1	Homologous	76	931.045	50.5475	116.448	C7J804.1(48.2);A0A0P0WKV1.1(33.8);	Os10g0111100 protein	Proton-dependent oligopeptide transporter family;		Q10PF8.1(118.9);Q69LA3.1(118.2);A0A0P0XQZ1.1(111.0);Q6ZGY3.1(107.3);Q6ZGW7.1(104.6);Q7G761.1(98.3);Q5N747.1(97.1);A0A0P0WML3.1(93.7);Q6YVW2.1(92.2);	MFS transporter superfamily;PTR2 family proton/oligopeptide symporter, conserved site;Proton-dependent oligopeptide transporter family;
Q652S6.1	Homologous	142	155.476	80.7007	115.769	A0A0P0XT38.1(74.3);	HTH myb-type domain-containing protein	Homeobox-like domain superfamily;Myb-like transcription factor;Myb domain;SANT/Myb domain;		Q6Z5L1.1(84.9);Q0J3I9.1(56.0);A0A0P0Y8F4.1(53.0);Q0JHU7.1(52.7);Q67WF6.1(49.6);Q6ZHS5.1(48.7);Q84SF0.1(46.0);A0A0P0VAQ0.1(42.5);	Homeobox-like domain superfamily;Myb domain;Myb-like transcription factor;SANT/Myb domain;
A0A0P0WLI0.1	Single-copy	99	259.024	67.7798	115.194		Os05g0370100 protein			A0A0P0WFD5.1(29.7);Q0DB68.1(29.5);A0A0P0V1C5.1(28.3);A0A0P0W939.1(28.3);A0A0P0VAC7.1(28.1);A0A0P0X6C4.1(26.2);Q0DZN8.1(25.7);A0A0N7KSR8.1(25.5);	FAR1 DNA binding domain;FHY3/FAR1 family;MULE transposase domain;Zinc finger, PMZ-type;Zinc finger, SWIM-type;
A0A0P0VY52.1	Homologous	91	751.925	52.8265	114.452	A0A0P0X6H7.1(138.5);Q6K906.1(33.5);	Rx_N domain-containing protein	Virus X resistance protein-like, coiled-coil domain;Rx, N-terminal;		Q0ITC8.1(87.9);Q84YX3.1(83.0);Q2R8W6.1(75.8);Q2R8Y8.1(61.5);Q5VN81.1(56.0);C7J3D2.1(54.7);Q5VP50.1(52.8);Q2QR00.1(52.5);Q94J89.1(51.9);A0A0P0WZD4.1(51.8);	Leucine-rich repeat;Leucine-rich repeat domain superfamily;NB-ARC;P-loop containing nucleoside triphosphate hydrolase;Rx, N-terminal;Virus X resistance protein-like, coiled-coil domain;
A0A0P0WE69.1	Homologous	139	466.916	58.5684	112.873	C7J804.1(56.6);A0A0P0WGM7.1(46.5);A0A0P0WKV1.1(44.6);Q5N735.1(39.0);	Os04g0597400 protein	MFS transporter superfamily;Proton-dependent oligopeptide transporter family;		Q5N734.1(118.4);Q0JHC1.2(117.7);Q5N733.1(116.6);A0A0P0VAW9.1(115.7);Q10PF8.1(114.5);A0A0P0VAX0.1(114.3);Q6YVW2.1(113.6);A0A0P0XQZ1.1(112.2);Q6ZGY3.1(110.4);Q6ZGW7.1(107.9);	MFS transporter superfamily;Proton-dependent oligopeptide transporter family;
A0A0P0VZD3.1	Single-copy	144	122.209	94.4556	112.461		Os03g0402600 protein	Chloramphenicol acetyltransferase-like domain superfamily;		Q8LND6.1(85.0);A0A0N7KCS7.1(34.6);Q5VP55.1(20.9);Q5VP60.1(20.0);A0A0P0WFA1.1(19.2);A0A0P0XCH6.1(18.8);A0A0P0WSB6.1(18.7);	Chloramphenicol acetyltransferase-like domain superfamily;Transferase;
A0A0P0Y5D0.1	Single-copy	42	286.8	65.6048	112.384		Os11g0685400 protein			Q2QZJ7.1(51.0);A0A0P0Y630.1(45.8);A0A0N7KTD1.1(40.6);Q109S4.1(20.0);Q654T3.1(12.4);	Leucine-rich repeat domain superfamily;NB-ARC;P-loop containing nucleoside triphosphate hydrolase;Rx, N-terminal;Virus X resistance protein-like, coiled-coil domain;
A0A0P0V2R2.1	Single-copy	81	196.983	72.5199	110.835		MATH domain-containing protein			Q2R115.1(34.2);Q7F0Z3.1(31.2);Q7XEG1.1(30.9);A0A0P0XDJ3.1(30.5);A0A0P0XE17.1(30.5);A3A605.1(30.0);B9G7V2.1(27.7);Q337Y6.2(26.9);	BPM, C-terminal;BTB/POZ domain;MATH/TRAF domain;SKP1/BTB/POZ domain superfamily;TRAF-like;
A0A0P0VG66.1	Single-copy	71	229.39	69.2479	110.384		RRM domain-containing protein	Nucleotide-binding alpha-beta plait domain superfamily;RNA-binding domain superfamily;RNA recognition motif domain;		Q6YYV1.1(49.4);Q6Z050.1(47.6);Q10N87.1(41.3);A0A0P0WGS4.1(32.5);	Nucleotide-binding alpha-beta plait domain superfamily;PABC (PABP) domain;Polyadenylate binding protein, human types 1, 2, 3, 4;Polyadenylate-binding protein/Hyperplastic disc protein;RNA recognition motif domain;RNA recognition motif domain, eukaryote;RNA-binding domain superfamily;
A0A0P0XVM7.1	Homologous	57	118.337	96.1053	110.235	A0A0P0VTJ2.1(72.3);	Os10g0491250 protein			P12331.2(51.2);P12330.2(48.4);Q8W0E6.1(45.3);	Chlorophyll A-B binding protein;Chlorophyll A-B binding protein, plant;Chlorophyll a/b binding domain superfamily;
A0A0P0XXM4.1	Single-copy	89	129.014	87.291	109.572		Os10g0557650 protein			A0A0P0WCW9.1(113.8);	WPP domain-associated protein;
A0A0P0YCS2.1	Homologous	108	403.197	60.1417	109.563	A0A0P0XGA4.1(54.0);Q2QYJ8.1(41.9);B9FCD6.1(40.1);Q10P69.1(38.1);	Os12g0633501 protein	Homeobox-like domain superfamily;Myb-like transcription factor;		Q69JE8.1(117.9);Q0DF64.1(117.0);B9G9P9.1(115.0);A3AWY9.1(111.2);Q67VZ4.1(110.1);Q6Z414.1(106.5);Q652E6.1(106.0);Q688D6.1(105.9);Q69SH8.1(105.4);Q9AQV2.1(104.6);	Homeobox-like domain superfamily;Myb domain;Myb-like transcription factor;SANT/Myb domain;
A0A0P0UYK4.1	Single-copy	89	370.502	61.2022	108.64		WAK_assoc domain-containing protein	Wall-associated receptor kinase, C-terminal;		A0A0P0UY09.1(67.9);Q5ZC55.1(59.0);A0A0P0UXQ9.1(56.2);Q5ZC57.1(53.7);Q5ZC67.1(50.3);Q0JQU7.1(46.7);Q5ZC64.1(30.7);A0A0P0WPZ5.1(30.2);	Protein kinase domain;Protein kinase, ATP binding site;Protein kinase-like domain superfamily;Serine-threonine/tyrosine-protein kinase, catalytic domain;Serine/threonine-protein kinase, active site;Wall-associated receptor kinase, C-terminal;Wall-associated receptor kinase, galacturonan-binding domain;
C7J414.1	Single-copy	68	295.644	64.4838	108.055		Os06g0339500 protein			A0A0P0Y2E2.1(27.8);B9F819.1(25.6);Q2R915.1(24.9);Q2R9X8.1(22.3);A0A0P0XZM1.1(21.2);A0A0P0VDQ9.1(21.1);Q5QMC8.1(19.7);A0A0N7KEX1.1(19.5);	Leucine-rich repeat;Leucine-rich repeat domain superfamily;Leucine-rich repeat, typical subtype;Leucine-rich repeat-containing N-terminal, plant-type;Protein kinase domain;Protein kinase, ATP binding site;Protein kinase-like domain superfamily;Serine/threonine-protein kinase, active site;
A0A0P0XRC5.1	Homologous	109	703.839	52.7587	106.519	A0A0P0W6L0.1(96.3);A0A0P0W6I1.1(57.9);A0A0P0W6I7.1(37.9);	Os10g0129732 protein	Protein kinase-like domain superfamily;		Q6YX21.1(98.0);Q94DZ6.1(97.0);B7F8F0.1(92.1);Q6ZFB7.1(91.9);A0A0N7KP76.1(91.8);Q2QMD1.1(90.4);Q2QMD5.1(89.6);Q53KU9.1(89.6);	Concanavalin A-like lectin/glucanase domain superfamily;Gnk2-homologous domain;Gnk2-homologous domain superfamily;Legume lectin domain;Legume lectin, alpha chain, conserved site;Legume lectin, beta chain, Mn/Ca-binding site;Protein kinase domain;Protein kinase, ATP binding site;Protein kinase-like domain superfamily;S-receptor-like serine/threonine-protein kinase;Serine-threonine/tyrosine-protein…
A0A0P0X890.1	Single-copy	150	120.436	90.2433	106.385		Os07g0594966 protein			Q69P73.1(28.5);Q69P77.1(28.1);A3BWN0.1(27.4);Q67TM1.1(24.4);B9G3V1.1(24.4);Q6Z0Q6.1(22.8);A0A0P0XMS3.1(19.5);A0A0P0VFR0.1(18.1);Q2QUC5.1(15.8);Q7EZR4.1(12.8);	Cytochrome P450;Cytochrome P450 superfamily;Cytochrome P450, E-class, group I;Cytochrome P450, conserved site;
A0A0P0V2U0.1	Single-copy	80	633.204	53.9988	106.356		Os01g0360100 protein			Q0JMU6.1(104.5);Q6L4D9.1(67.0);Q10AL3.1(59.4);Q6L4D7.1(45.7);A0A0P0XRB6.1(43.4);B9G7D8.1(39.3);Q0J403.1(30.4);Q2QR00.1(27.3);	Leucine-rich repeat domain superfamily;Leucine-rich repeat, typical subtype;NB-ARC;P-loop containing nucleoside triphosphate hydrolase;Rx, N-terminal;Virus X resistance protein-like, coiled-coil domain;
Q2QYW1.1	Homologous	149	260.573	66.2523	106.155	Q8RYJ8.1(146.8);Q6F332.3(75.7);Q0JNL7.1(75.5);Q0JNS6.2(75.5);Q2RAN7.1(44.4);Q84VG0.1(40.5);Q6YYX3.1(38.7);	Probable calcium-binding protein CML25/26	EF-hand domain pair;EF-Hand 1, calcium-binding site;EF-hand domain;EF-hand domain pair protein CML-like;		Q0DYK7.1(117.1);Q8LPZ7.1(100.6);Q6I5I8.1(100.1);A2ZVI7.1(99.4);Q6I587.1(98.9);	EF-Hand 1, calcium-binding site;EF-hand domain;EF-hand domain pair;Protein kinase domain;Protein kinase, ATP binding site;Protein kinase-like domain superfamily;Serine/threonine-protein kinase, active site;
A0A0P0Y177.1	Single-copy	127	119.459	89.4449	104.508		Os11g0274300 protein			B9EY47.1(45.8);Q6ZLB6.1(22.2);Q8L4G8.1(20.2);Q75G55.1(16.7);Q5NAK4.1(14.4);	Voltage-dependent anion channel;Voltage-dependent anion channel superfamily;
A0A0P0VPF7.1	Single-copy	71	112.955	93.7975	103.384		Os02g0745800 protein			B9FLA1.1(36.0);B7F980.1(32.5);Q5Z993.1(20.8);	Protein of unknown function DUF616;
Q6EPR3.1	Single-copy	99	150.157	77.4152	101.706		Os09g0284500 protein	Homeobox-like domain superfamily;		A0A0P0WIG3.1(37.2);Q0JQJ6.1(34.7);B9F1T8.1(28.1);Q5VS69.1(26.1);Q0JQS2.1(21.7);Q5N9B7.1(21.6);Q7XC51.1(20.4);Q5Z5B9.1(20.3);Q0J7W9.1(19.5);Q5SNG6.1(19.3);	Homeobox-like domain superfamily;Myb domain;Myb domain, plants;Myb-like domain;SANT/Myb domain;Zinc finger, CCHC-type;
A0A0P0WNG0.1	Homologous	134	247.178	66.2776	100.849	A0A0N7KHM3.1(59.0);	Os05g0454800 protein			Q5JLQ9.1(44.2);Q9LWM4.1(44.0);Q60EY8.1(43.9);Q5W736.1(39.7);Q0JI49.1(36.3);Q6ERS4.1(35.1);Q7X996.1(34.9);Q5QNM6.1(34.5);Q5JLS2.1(34.5);Q6H7U5.1(34.1);	NAF domain;NAF/FISL domain;Protein kinase domain;Protein kinase, ATP binding site;Protein kinase-like domain superfamily;Serine/threonine-protein kinase, active site;
B9G3X6.1	Homologous	85	256.229	65.6354	100.592	A0A0P0Y660.1(37.1);	Neprosin_AP domain-containing protein	Neprosin activation peptide;		Q69Y39.1(43.9);A0A0P0WIV0.1(40.8);Q6ZIY2.1(36.8);A0A0N7KEH6.1(36.6);Q6ZL19.1(36.0);Q84M37.1(33.8);Q5JK80.1(33.4);Q0J3L1.1(22.1);	Neprosin;Neprosin activation peptide;
B9GDI5.1	Homologous	96	277.88	64.2865	100.294	A3CI25.1(190.9);A0A0P0VHY3.1(57.6);A0A0P0X4D4.1(30.9);	Os12g0535000 protein	F-box-like domain superfamily;		Q2QQE3.1(74.3);Q8GVM0.1(69.0);Q8GVM3.1(68.5);Q7XSL8.2(62.5);Q0JES4.1(51.9);	F-box domain;F-box-like domain superfamily;FBD domain;Leucine-rich repeat 2;Leucine-rich repeat domain superfamily;
A0A0P0XTA3.1	Single-copy	83	138.94	78.9795	98.7208		Os10g0365632 protein			Q339E0.1(101.3);Q65XL3.1(17.9);	Protein of unknown function DUF3615;
A0A0P0VV53.1	Single-copy	45	218.784	67.8956	97.924		Os03g0237401 protein			P0DH88.1(52.4);P0DH89.1(52.4);Q7XH85.2(51.0);Q5VSA8.1(36.7);	GAGA-binding transcriptional activator;
Q0D8Q7.1	Single-copy	73	247.336	65.3452	95.3943		Os07g0137000 protein			Q0JHU7.1(39.9);Q0DHL1.1(34.9);A0A0P0WYS8.1(30.5);A0A0P0Y8F4.1(30.3);Q8RUI9.1(26.0);Q69JE8.1(24.9);Q5TKI8.1(24.6);B9G9P9.1(24.2);Q0JR06.1(24.0);	Homeobox-like domain superfamily;Myb domain;Myb-like domain;Myb-like transcription factor;SANT/Myb domain;
A0A0P0X6H7.1	Homologous	119	703.11	51.4681	95.2703	A0A0P0VY52.1(138.4);Q6K906.1(33.4);A0A0N7KJG5.1(30.1);	Rx_N domain-containing protein	Virus X resistance protein-like, coiled-coil domain;Rx, N-terminal;		A2ZU51.1(90.7);Q0ITC8.1(84.8);Q84YX3.1(79.8);Q2R8W6.1(76.3);Q5VP50.1(66.4);Q2R8Y8.1(65.8);Q5VN81.1(65.3);C7J3D2.1(61.9);Q2QZF1.1(60.7);Q94J89.1(59.6);	Leucine-rich repeat;Leucine-rich repeat domain superfamily;NB-ARC;P-loop containing nucleoside triphosphate hydrolase;Rx, N-terminal;Virus X resistance protein-like, coiled-coil domain;
A0A0N7KH78.1	Single-copy	37	96.3027	114.651	95.2076		Os03g0333500 protein			Q10LV1.1(67.6);	AGC-kinase, C-terminal;Protein kinase domain;Protein kinase, ATP binding site;Protein kinase, C-terminal;Protein kinase-like domain superfamily;Serine/threonine-protein kinase, active site;
A0A0P0Y0C7.1	Single-copy	74	101.069	97.8622	95.1994		Os11g0222560 protein			Q5QM88.1(17.7);A2ZWV5.1(17.1);Q2R917.1(15.8);Q8W0E9.1(15.0);Q0DG23.1(12.6);Q67IY2.1(11.4);	Aspartic peptidase A1 family;Aspartic peptidase domain superfamily;Aspartic peptidase, active site;Bulb-type lectin domain;Bulb-type lectin domain superfamily;CND41-like;PAN/Apple domain;Pepsin-like domain, plant;Peptidase family A1 domain;Protein kinase, ATP binding site;Protein kinase-like domain superfamily;Protein of unknown function DUF761, plant;S-locus glycoprotein domain;Xylanase inhibito…
A0A0P0YAD1.1	Single-copy	77	97.8998	103.299	94.5163		Os12g0492600 protein			Q9FP29.1(14.8);Q8L570.1(14.5);Q6K739.1(14.5);Q8S222.1(12.9);Q5Z9P4.1(12.3);B7FA58.1(11.1);	Alpha/Beta hydrolase fold;Bile acid:sodium symporter;Bile acid:sodium symporter/arsenical resistance protein Acr3;Chloramphenicol acetyltransferase-like domain superfamily;ELK domain;Fungal lipase-like domain;Homeobox KN domain;Homeobox domain;Homeobox, conserved site;Homeobox-like domain superfamily;KNOX1;KNOX2;Magnesium transporter NIPA;Mono-/di-acylglycerol lipase, N-terminal;Protein kinase do…
A0A0N7KL68.1	Homologous	83	203.638	68.5361	94.3799	Q2R2H2.1(32.4);	Os05g0547200 protein	Nitrate regulatory gene2 protein;		A0A0P0VMF1.1(97.1);Q9AQW1.1(46.1);A0A0P0XQP5.1(18.4);Q0JLN8.1(13.3);	Domain of unknown function DUF630;Domain of unknown function DUF632;Nitrate regulatory gene2 protein;
A0A0P0WMU8.1	Homologous	86	275.461	63.4733	94.3143	Q0JHH7.1(66.5);B9FI64.1(44.7);B9F6T8.1(34.9);Q0DFN8.1(34.6);A0A0P0X597.1(33.6);B9FLS2.1(33.3);Q0JL02.1(32.8);A0A0P0V5P4.1(32.3);Q75IQ0.1(31.5);A2ZW92.1(30.6);	Myb-like domain-containing protein	Homeobox-like domain superfamily;Myb-like domain;SANT/Myb domain;		Q6F2M6.1(113.4);Q60EH1.1(92.3);Q5N9B7.1(87.5);Q0JQS2.1(82.5);Q8LH59.1(79.8);Q84PV0.1(54.3);Q6K786.1(39.8);A0A0P0VAQ0.1(31.7);	Homeobox-like domain superfamily;Myb domain;Myb domain, plants;Myb-like domain;Myb-like transcription factor;SANT/Myb domain;
A0A0P0W9E0.1	Single-copy	104	199.871	68.8587	94.2388		F-box domain-containing protein	F-box-like domain superfamily;F-box domain;		A0A0N7KQ54.1(61.9);A0A0P0XP42.1(48.3);A0A0P0XNK5.1(45.7);Q7XC13.1(44.3);Q2QXA0.2(42.6);A0A0P0XVE1.1(40.3);	F-box associated domain, type 1;F-box associated domain, type 3;F-box associated interaction domain;F-box domain;F-box-like domain superfamily;Galactose oxidase/kelch, beta-propeller;
C7J2E3.1	Single-copy	133	95.2815	112.995	94.0054		J domain-containing protein	DnaJ domain;Chaperone J-domain superfamily;		Q9XFD9.2(31.9);Q9FTT4.1(30.9);Q688X8.1(30.5);Q84SD3.1(29.2);Q6Z6Z5.1(26.1);B9FHF3.1(20.1);Q8S0V9.1(19.7);Q0DYZ8.1(17.0);	Chaperone DnaJ;Chaperone DnaJ, C-terminal;Chaperone J-domain superfamily;DnaJ domain;DnaJ domain, conserved site;Domain of unknown function DUF1977, DnaJ-like;HSP40/DnaJ peptide-binding;Heat shock protein DnaJ, cysteine-rich domain;Heat shock protein DnaJ, cysteine-rich domain superfamily;
A0A0P0WTH7.1	Single-copy	85	439.354	56.9224	93.5214		Os06g0169600 protein			Q43594.2(59.1);P37832.2(59.1);Q76FS3.1(59.1);Q8H7U1.1(59.1);P46265.1(59.1);Q40665.2(59.1);P45960.1(59.1);Q76FS2.1(59.0);O49068.1(21.5);	Beta tubulin;Beta tubulin, autoregulation binding site;Gamma tubulin;Tubulin;Tubulin, C-terminal;Tubulin, conserved site;Tubulin/FtsZ, 2-layer sandwich domain;Tubulin/FtsZ, C-terminal;Tubulin/FtsZ, C-terminal domain superfamily;Tubulin/FtsZ, GTPase domain;Tubulin/FtsZ, GTPase domain superfamily;
A0A0P0X7C1.1	Homologous	123	206.848	68.0489	93.3662	A0A0P0VLE0.1(70.5);A0A0P0WZR8.1(61.3);	Os07g0554400 protein			A0A0P0XH65.1(76.8);A0A0P0X8A8.1(62.2);Q6YYW9.1(61.5);Q2R3L6.1(61.0);Q5Z5G1.1(61.0);Q7F0Z6.1(60.2);Q0JEE5.1(59.7);	Myb-like domain;No apical meristem-associated, C-terminal domain;
A0A0P0YAC6.1	Single-copy	101	118.648	82.8733	92.984		Os12g0493300 protein			Q2QQI2.1(92.0);Q2QQI5.1(18.6);Q10NR6.1(18.3);Q6Z8T5.1(15.2);Q6Z8T4.1(14.7);	F-box associated domain, type 1;F-box associated interaction domain;F-box domain;F-box-like domain superfamily;The fantastic four family;
A0A0P0Y308.1	Single-copy	55	256.877	64.3002	92.7943		USP domain-containing protein			Q33AW7.1(44.3);A0A0P0X2E4.1(26.6);A0A0N7KQM0.1(24.3);A0A0P0XPE6.1(20.4);Q6ZJC2.1(19.6);Q0DGV1.1(18.9);Q6K8Z3.1(17.2);	DUSP-like superfamily;Papain-like cysteine peptidase superfamily;Peptidase C19, ubiquitin carboxyl-terminal hydrolase;Peptidase C19, ubiquitin-specific peptidase, DUSP domain;Ubiquitin specific protease domain;Ubiquitin specific protease, conserved site;Zinc finger, MYND-type;
Q0DKH9.1	Single-copy	126	672.449	51.669	92.7105		Os05g0162500 protein			Q10N60.1(86.2);Q10SF5.1(74.8);Q75IG6.1(72.2);A0A0P0WKX1.1(70.5);Q94EF4.1(70.0);Q10DI4.1(69.3);Q336X4.1(68.7);Q10LW0.1(66.8);Q8H651.1(65.6);	Malectin-like domain;Protein kinase domain;Protein kinase, ATP binding site;Protein kinase-like domain superfamily;Serine-threonine/tyrosine-protein kinase, catalytic domain;Serine/threonine-protein kinase, active site;
A0A0N7KCV7.1	Single-copy	99	137.454	77.2172	92.5044		Os01g0328101 protein			Q6Z0Z0.1(79.8);Q7XVN6.1(14.3);Q53NA8.1(12.4);	Armadillo-type fold;DNA polymerase V/Myb-binding protein 1A;F-box domain;F-box-like domain superfamily;Kelch repeat type 1;Kelch-type beta propeller;NAD(P)-binding domain superfamily;Short-chain dehydrogenase/reductase SDR;Short-chain dehydrogenase/reductase, conserved site;
Q2HWH1.1	Homologous	134	531.588	54.35	91.9277	Q6H468.1(217.9);Q6K9T0.1(177.9);Q2HWG0.1(117.0);Q8GVV6.1(114.4);Q2HWG1.1(113.6);Q7XN30.2(38.2);	Two-component response regulator ORR5	CheY-like superfamily;Signal transduction response regulator, receiver domain;		Q10N34.1(80.4);Q0D3B6.1(80.0);Q689G6.1(75.7);Q5N6V8.2(73.0);Q5SML5.1(72.1);Q8H7S7.1(68.2);Q6K8X6.1(67.9);Q6H805.1(66.6);Q67W50.1(66.3);	CCT domain;CheY-like superfamily;Homeobox-like domain superfamily;Myb domain;Myb domain, plants;Response regulator B-type, plant;SANT/Myb domain;Signal transduction response regulator, receiver domain;
A0A0P0UYT6.1	Homologous	129	1030.74	46.7543	91.8477	A0A0P0VEV5.1(37.5);C7J946.1(32.2);	LRRNT_2 domain-containing protein	Leucine-rich repeat domain superfamily;Leucine-rich repeat-containing N-terminal, plant-type;		Q75J19.1(118.6);A0A0P0Y5V7.1(118.2);Q6K7X3.1(117.9);Q6K8K0.1(117.9);A0A0P0Y3K7.1(117.6);Q5JKV7.1(117.1);Q8L3T4.1(116.4);Q2R2H0.1(115.9);Q5Z9N5.1(114.9);	Leucine rich repeat 4;Leucine-rich repeat;Leucine-rich repeat domain superfamily;Leucine-rich repeat, typical subtype;Leucine-rich repeat-containing N-terminal, plant-type;Protein kinase domain;Protein kinase, ATP binding site;Protein kinase-like domain superfamily;Serine-threonine/tyrosine-protein kinase, catalytic domain;Serine/threonine-protein kinase, active site;
Q7F0Z7.1	Single-copy	109	148.996	74.7046	91.7061		Os08g0225700 protein			A0A0P0XE17.1(36.2);A0A0P0XDJ3.1(35.4);Q7F0Z3.1(30.8);B9F591.1(29.1);Q8H4G1.1(26.9);Q7XEG4.1(21.2);A0A0P0XUU8.1(20.7);Q2R115.1(19.4);Q8H3E5.1(18.1);	BPM, C-terminal;BTB/POZ domain;MATH/TRAF domain;SKP1/BTB/POZ domain superfamily;TRAF-like;
A0A0P0XE35.1	Homologous	126	140.861	76.1111	91.305	A3A073.1(51.6);	Os08g0274775 protein			Q6I5E0.1(68.6);Q6K881.1(42.1);Q5Z885.1(41.4);Q6Z1Z0.1(14.4);Q5Z978.1(12.6);Q942W3.1(12.2);	Molybdate transporter 1/2;Phosphatidylinositol 3-/4-kinase, catalytic domain;Protein kinase-like domain superfamily;Protein of unknown function DUF241, plant;Protein of unknown function DUF761, plant;Ubiquitin domain;Ubiquitin-like domain superfamily;
A0A0P0W6I7.1	Homologous	86	824.682	49.1581	91.2456	A0A0P0W6I1.1(53.9);A0A0P0W6L0.1(47.5);A0A0P0XRC5.1(38.1);	Os04g0140400 protein			Q6YX21.1(98.0);Q94DZ6.1(97.0);B7F8F0.1(92.1);Q6ZFB7.1(91.9);A0A0N7KP76.1(91.8);Q2QMD1.1(90.4);Q2QMD5.1(89.6);Q53KU9.1(89.6);	Concanavalin A-like lectin/glucanase domain superfamily;Gnk2-homologous domain;Gnk2-homologous domain superfamily;Legume lectin domain;Legume lectin, alpha chain, conserved site;Legume lectin, beta chain, Mn/Ca-binding site;Protein kinase domain;Protein kinase, ATP binding site;Protein kinase-like domain superfamily;S-receptor-like serine/threonine-protein kinase;Serine-threonine/tyrosine-protein…
A0A0P0VYD2.1	Single-copy	132	161.335	72.6174	91.1648		PEROXIDASE_4 domain-containing protein	Haem peroxidase;Haem peroxidase superfamily;Peroxidases heam-ligand binding site;		Q7X8H7.1(112.4);Q67VC4.1(53.3);Q6Z7S2.1(48.8);Q0J459.1(37.5);Q8W2X2.1(37.0);Q10SI9.1(36.3);Q0J9F3.1(35.2);Q8GVP1.1(35.1);Q5Z8H5.1(35.0);Q6AVZ3.1(34.5);	Haem peroxidase;Haem peroxidase superfamily;Peroxidase, active site;Peroxidases heam-ligand binding site;Plant peroxidase;Secretory peroxidase;
A0A0P0W204.1	Homologous	145	202.667	67.9324	90.8948	Q6K8D1.1(62.6);	BTB domain-containing protein	BTB/POZ domain;SKP1/BTB/POZ domain superfamily;		Q2R115.1(119.4);Q7XEG0.1(119.1);Q7F1J2.1(118.5);Q0J9Y3.1(113.4);A0A0P0XUU8.1(112.6);Q6Z0V7.1(111.9);A0A0P0WEY4.1(110.2);Q7XEG4.1(108.8);	BPM, C-terminal;BTB/POZ domain;MATH/TRAF domain;SKP1/BTB/POZ domain superfamily;TRAF-like;
B9FCD6.1	Homologous	97	456.206	55.9103	89.5974	Q10P69.1(199.7);Q2QYJ8.1(194.5);A0A0N7KEU4.1(45.8);A0A0P0XGA4.1(41.0);A0A0P0YCS2.1(40.1);	HTH myb-type domain-containing protein	Homeobox-like domain superfamily;Myb-like transcription factor;Myb domain;		Q69JE8.1(119.4);Q0DF64.1(116.7);B9G9P9.1(116.6);A3AWY9.1(112.9);Q67VZ4.1(109.7);Q652E6.1(108.1);Q6Z414.1(106.5);Q688D6.1(105.6);Q69SH8.1(105.6);Q7XDC7.1(105.2);	Homeobox-like domain superfamily;Myb domain;Myb-like transcription factor;SANT/Myb domain;
A0A0P0XVD9.1	Homologous	75	425.818	56.74	89.3458	A0A0P0X5V7.1(32.6);	Os10g0458600 protein			A0A0P0X5X9.1(73.7);A0A0P0X6A0.1(65.0);Q0J5U5.1(58.6);Q6EPK9.1(45.3);A0A0P0XLJ7.1(43.7);Q0J2I9.1(42.6);A0A0P0XL82.1(35.3);A0A0P0XK79.1(34.0);A0A0P0XZN9.1(33.5);	Ankyrin repeat;Ankyrin repeat-containing domain;Ankyrin repeat-containing domain superfamily;PGG domain;
Q653R4.1	Homologous	102	313.57	60.7461	89.0102	Q6Z4I3.1(50.8);Q851R5.1(50.5);Q0D840.1(38.5);	Thioredoxin domain-containing protein	Thioredoxin-like superfamily;Thioredoxin domain;		Q2QTV8.1(91.9);Q75M08.2(82.7);Q942L2.1(81.5);Q67UF5.1(81.3);Q53LQ0.1(67.3);	Disulphide isomerase;Endoplasmic reticulum resident protein 29, C-terminal;Endoplasmic reticulum resident protein 29, C-terminal domain superfamily;Leucine-rich repeat domain superfamily;NB-ARC;P-loop containing nucleoside triphosphate hydrolase;Protein disulphide isomerase;Rx, N-terminal;Thioredoxin domain;Thioredoxin, conserved site;Thioredoxin-like superfamily;
A0A0P0Y2K8.1	Single-copy	99	93.4658	98.8434	88.5184		Os11g0524051 protein			Q94GL5.1(17.5);Q8S0V9.1(15.8);Q2QZH3.1(14.2);Q5ZC77.1(14.1);Q53LV0.1(13.7);Q6YPG4.1(13.4);Q7XGI7.1(13.4);	Chaperone J-domain superfamily;DnaJ domain;DnaJ domain, conserved site;Domain of unknown function DUF1977, DnaJ-like;Glycosyl transferase, family 14;Helix-turn-helix motif;Homeobox domain;Homeobox, conserved site;Homeobox-like domain superfamily;Leucine zipper, homeobox-associated;Protein arginine methyltransferase NDUFAF7;Protein arginine methyltransferase NDUFAF7 superfamily;RGS1-HXK1-interacti…
A0A0P0XIN9.1	Single-copy	145	424.667	56.571	87.9206		Os08g0527800 protein	Papain-like cysteine peptidase superfamily;		Q6ZIC7.1(101.4);Q0J492.1(92.5);Q0J4A0.1(90.7);Q6ZKX9.1(69.8);Q0J0M6.1(65.5);Q6K8Z3.1(16.3);A0A0P0X2E4.1(14.8);	Papain-like cysteine peptidase superfamily;Peptidase C19, ubiquitin carboxyl-terminal hydrolase;Ubiquitin specific protease domain;Ubiquitin specific protease, conserved site;Zinc finger, RING/FYVE/PHD-type;Zinc finger, UBP-type;
Q53MU8.1	Homologous	73	785.462	49.2767	87.8269	A0A0P0VEQ6.1(93.8);	Lupeol synthase, putative	Terpenoid cyclases/protein prenyltransferase alpha-alpha toroid;		Q0IS49.1(120.0);Q0IT98.1(119.9);Q2R712.1(111.2);H2KWF1.1(103.3);Q6Z2X6.1(83.2);Q0J778.2(72.6);Q10NC7.1(12.5);	Oxysterol-binding protein;Oxysterol-binding protein superfamily;Oxysterol-binding protein, conserved site;Squalene cyclase;Squalene cyclase, C-terminal;Squalene cyclase, N-terminal;Terpene synthase, conserved site;Terpenoid cyclases/protein prenyltransferase alpha-alpha toroid;
A0A0P0W448.1	Single-copy	108	99.8605	89.0583	86.9336		Os03g0791200 protein			Q852M1.1(19.5);Q852M2.1(19.4);Q7XH05.1(18.3);Q67V39.1(10.0);	2Fe-2S ferredoxin, iron-sulphur binding site;2Fe-2S ferredoxin-like superfamily;2Fe-2S ferredoxin-type iron-sulfur binding domain;Aldehyde oxidase/xanthine dehydrogenase;Aldehyde oxidase/xanthine dehydrogenase, a/b hammerhead;Aldehyde oxidase/xanthine dehydrogenase, a/b hammerhead superfamily;Aldehyde oxidase/xanthine dehydrogenase, molybdopterin binding;Aldehyde oxidase/xanthine dehydrogenase, m…
A0A0P0XSD4.1	Single-copy	80	96.0014	91.9137	86.3506		zinc_ribbon_9 domain-containing protein	E3 ubiquitin-protein ligase RNF126-like, zinc-ribbon;		Q84Q81.1(27.7);Q65XW6.1(23.8);Q5JME3.1(22.6);Q7XD81.1(20.7);Q6AVN2.1(17.5);	Domain of unknown function DUF1117;E3 ubiquitin-protein ligase RNF126-like, zinc-ribbon;E3 ubiquitin-protein ligase SIRP1;RNA polymerase subunit RPABC4/transcription elongation factor Spt4;Zinc finger, RING-type;Zinc finger, RING/FYVE/PHD-type;
A0A0P0Y544.1	Homologous	128	742.477	49.6781	86.0268	A0A0P0XRU9.1(34.0);A0A0P0XLA2.1(32.9);C7J989.1(31.7);	Protein kinase domain-containing protein			Q6EQK1.1(118.9);A0A0P0XKH9.1(116.4);A0A0P0YBK6.1(112.4);A0A0P0WPP1.1(112.1);Q65X96.1(111.0);A0A0P0X6D5.1(108.3);B7FAC9.1(107.1);	Leucine-rich repeat;Leucine-rich repeat domain superfamily;Malectin-like domain;Protein kinase domain;Protein kinase, ATP binding site;Protein kinase-like domain superfamily;Serine-threonine/tyrosine-protein kinase, catalytic domain;Serine/threonine-protein kinase, active site;
A0A0P0XAN8.1	Homologous	47	843.419	48.2426	85.9864	A0A0P0VX49.1(42.6);A0A0P0XGA4.1(33.9);	Os08g0102050 protein			Q7XBH4.2(117.5);Q67VZ4.1(117.3);Q7X8X3.1(114.8);Q2QYC1.1(110.0);Q6K1S6.1(109.9);Q2RB26.1(109.8);Q652E6.1(109.3);Q75LP7.1(106.4);Q8RUI9.1(105.6);	Homeobox-like domain superfamily;Myb domain;Myb-like transcription factor;SANT/Myb domain;
A0A0P0VTH2.1	Single-copy	78	259.225	62.959	85.7783		RRM domain-containing protein			Q69IL3.1(40.6);Q6YVX9.2(30.4);Q0JKK3.1(28.4);Q7XQI1.2(27.8);Q6AUG0.1(27.7);Q9ZQW8.1(26.7);Q8L460.1(24.8);Q2QZL4.2(23.0);A0A0N7KSQ1.1(20.6);	G-patch domain;GYF domain 2;GYF-like domain superfamily;Nucleotide-binding alpha-beta plait domain superfamily;RNA recognition motif domain;RNA recognition motif domain, eukaryote;RNA-binding domain superfamily;Spen paralogue and orthologue SPOC, C-terminal;Splicing factor 45;TatSF1-like;TatSF1-like, RNA recognition motif 1;U2 auxiliary factor small subunit;U2 snRNP auxilliary factor, large subun…
A0A0P0V0E1.1	Single-copy	97	174.839	69.6	85.6714		Os01g0249000 protein			Q8H067.1(51.0);B9G9U6.1(18.3);Q0DZM7.2(18.0);Q6ZCZ2.1(16.1);A0A0P0XZM1.1(15.4);A0A0N7KSI2.1(14.7);	AAA+ ATPase domain;Leucine-rich repeat;Leucine-rich repeat domain superfamily;Leucine-rich repeat, typical subtype;Leucine-rich repeat-containing N-terminal, plant-type;NB-ARC;P-loop containing nucleoside triphosphate hydrolase;Protein kinase domain;Protein kinase, ATP binding site;Protein kinase-like domain superfamily;Serine/threonine-protein kinase, active site;
A0A0P0WMF3.1	Single-copy	122	139.035	74.6803	85.4953		Os05g0416801 protein			Q7XI25.1(21.2);Q8LQH1.1(20.6);Q5ZBQ1.1(19.2);Q6ZF83.1(18.3);A0A0P0WAE2.1(16.6);Q7XUM4.1(15.4);	Bulb-type lectin domain;Bulb-type lectin domain superfamily;PAN/Apple domain;Protein kinase domain;Protein kinase, ATP binding site;Protein kinase-like domain superfamily;S-locus glycoprotein domain;S-receptor-like serine/threonine-protein kinase;Serine/threonine-protein kinase, active site;
Q10N71.1	Homologous	78	105.516	83.7641	84.2452	Q943N1.1(94.6);Q6L4Z7.1(88.7);	Os03g0280400 protein	Conserved hypothetical protein CHP01589, plant;		Q0E447.1(57.4);Q5Z8V1.1(47.9);Q6H680.1(22.5);Q6Z0V7.1(14.0);	BPM, C-terminal;BTB/POZ domain;Conserved hypothetical protein CHP01589, plant;MATH/TRAF domain;SKP1/BTB/POZ domain superfamily;TRAF-like;
Q0E2T8.1	Single-copy	140	144.531	73.3379	84.2153		Os02g0215100 protein			C7J0P7.1(90.3);Q6K2P5.1(88.7);	DYW domain;Pentatricopeptide repeat;Tetratricopeptide-like helical domain superfamily;
A0A0P0VXC3.1	Single-copy	93	211.906	65.6742	83.3871		Os03g0343200 protein	Protein of unknown function DUF868, plant;		Q6Z9I5.1(96.2);Q65X22.1(48.7);A0A0P0Y6Z9.1(47.4);A0A0P0WT63.1(45.9);Q84M57.1(44.1);Q5N869.1(37.2);Q6YTU4.1(31.3);	Protein of unknown function DUF868, plant;
A0A0P0WL68.1	Homologous	130	526.69	53.2731	83.2516	A0A0P0WGM7.1(35.8);A0A0P0WKV1.1(32.1);C7J804.1(31.9);	Os05g0338933 protein	MFS transporter superfamily;Proton-dependent oligopeptide transporter family;		Q10PF8.1(118.9);A0A0P0WML3.1(117.6);Q5N733.1(110.8);Q6I5V4.1(108.6);Q6ZGY3.1(108.5);A0A0P0XQZ1.1(106.1);Q6ZGW7.1(101.7);Q7G761.1(98.3);A0A0P0VBU6.1(96.9);	MFS transporter superfamily;PTR2 family proton/oligopeptide symporter, conserved site;Proton-dependent oligopeptide transporter family;
B9G9L3.1	Single-copy	90	84.3366	110.657	82.9145		Os11g0169501 protein			B9FWE5.1(26.4);Q10B37.1(17.2);Q5ZA34.1(15.6);A0A0P0V5S3.1(15.0);Q6Z0Z4.1(13.0);	39S ribosomal protein L46, mitochondrial;Casparian strip membrane protein domain;Glycosyltransferase 61;Protein of unknown function DUF789;VWA-Hint protein, Vwaint domain;von Willebrand factor A-like domain superfamily;von Willebrand factor, type A;
A0A0P0WUL8.1	Single-copy	89	101.251	84.9809	82.7515		Os06g0220701 protein			Q336V3.1(20.9);Q0JJ01.1(20.5);Q10N64.1(19.1);Q0D402.1(18.0);Q4JHE0.1(17.6);Q6EPA2.1(16.9);	Ankyrin repeat;Ankyrin repeat-containing domain;Ankyrin repeat-containing domain superfamily;BKI1/Probable membrane-associated kinase regulator 1/3/4;BTB/POZ domain;Cytochrome P450;Cytochrome P450 superfamily;Cytochrome P450, E-class, group I;Cytochrome P450, conserved site;NPR1/NIM1-like, C-terminal;Plastid division protein PDV1/PDV2;Regulatory protein NPR, central domain;S-adenosyl-L-methionine…
A0A0P0X6L7.1	Single-copy	85	412.874	56.0259	81.8428		Os07g0517500 protein			A0A0P0WRK9.1(79.9);Q5ZDA1.1(77.0);A0A0P0V5Q6.1(73.2);Q69S65.1(53.5);Q94IX9.1(53.1);Q2QLK2.2(52.0);Q2QR70.1(51.9);	AAA+ ATPase domain;AAA-type ATPase, N-terminal domain;ATPase, AAA-type, conserved site;ATPase, AAA-type, core;P-loop containing nucleoside triphosphate hydrolase;
B9FHW9.1	Homologous	110	228.653	64.13	81.703	A0A0P0XXH9.1(82.2);	Os05g0558500 protein	Protein of unknown function DUF3615;		Q8H7J8.1(108.6);Q336W6.1(86.0);Q7XCM6.1(63.0);Q5VNV6.1(60.4);A0A0P0Y4T1.1(49.0);A0A0P0XTE5.1(44.9);Q5VNV5.1(43.6);B7F9T8.1(43.6);Q5VNU1.1(40.9);	Protein of unknown function DUF3615;
A0A0P0WJU3.1	Homologous	115	408.496	55.8904	80.0992	B7EDI5.1(151.6);A0A0P0WJZ9.1(134.9);A0A0P0WEZ8.1(95.0);Q0J7D7.1(86.5);	Os05g0253200 protein			A0A0P0WET4.1(111.5);A0A0N7KJP8.1(94.1);Q6EUF7.1(40.7);A0A0P0WKH3.1(26.9);Q6EQG8.1(25.9);Q10LZ2.1(17.0);Q6EUQ1.1(15.0);A0A0P0Y0Y5.1(12.0);	Leucine-rich repeat;Leucine-rich repeat domain superfamily;Leucine-rich repeat, typical subtype;Leucine-rich repeat-containing N-terminal, plant-type;Malectin domain;Protein kinase domain;Protein kinase, ATP binding site;Protein kinase-like domain superfamily;Serine-threonine/tyrosine-protein kinase, catalytic domain;Serine/threonine-protein kinase, active site;
A0A0P0XS58.1	Single-copy	86	242.35	62.6907	78.7614		Os10g0173400 protein	SAM dependent carboxyl methyltransferase;S-adenosyl-L-methionine-dependent methyltransferase;		Q7XPJ6.1(36.1);Q5Z4A0.1(32.8);Q7XPJ8.1(31.1);Q69UX7.1(30.0);A0A0N7KJW0.1(28.0);Q9FW31.2(27.8);A0A0P0WG49.1(27.4);Q5N8J5.1(26.7);A0A0P0WW24.1(26.5);Q6ZI02.1(26.1);	Methyltransferase, alpha-helical capping domain;S-adenosyl-L-methionine-dependent methyltransferase;SAM dependent carboxyl methyltransferase;
A0A0P0W624.1	Single-copy	87	89.6534	89.4471	78.435		Os04g0111301 protein			Q6YW99.1(14.8);Q0JF76.1(13.3);Q2QMG1.1(13.2);Q94GN4.1(13.1);Q5VQM7.1(11.0);	Leucine-rich repeat;Leucine-rich repeat domain superfamily;Leucine-rich repeat, typical subtype;Leucine-rich repeat-containing N-terminal, plant-type;Protein kinase domain;Protein kinase, ATP binding site;Protein kinase-like domain superfamily;Serine-threonine/tyrosine-protein kinase, catalytic domain;Serine/threonine-protein kinase, active site;
Q0J512.1	Single-copy	149	244.801	62.4577	78.312		DUF547 domain-containing protein			Q5Z809.1(87.3);Q5Z663.1(78.8);B9G4C3.1(61.7);Q7EZ88.1(55.7);Q108Y5.1(51.4);Q67UI1.1(44.2);	DEP domain;Domain of unknown function DUF547;Glutaredoxin;Ternary complex factor MIP1, leucine-zipper;Thioredoxin-like superfamily;Winged helix DNA-binding domain superfamily;Winged helix-like DNA-binding domain superfamily;
Q0IW18.1	Single-copy	96	85.2157	93.7875	77.9888		Os10g0540000 protein			Q75LP7.1(20.0);B9GBN8.1(18.1);A0A0P0XYD9.1(17.4);A0A0P0XBW5.1(16.7);Q0DUU3.1(16.6);A0A0P0X5W0.1(16.5);A0A0P0VQ82.1(16.0);	E3 ubiquitin-protein ligase RNF126-like, zinc-ribbon;Homeobox-like domain superfamily;Mpv17/PMP22;Myb domain;Myb domain, plants;Myb-like transcription factor;Protein of unknown function DUF620;Rx, N-terminal;SANT/Myb domain;Virus X resistance protein-like, coiled-coil domain;Zinc finger, RING-type;Zinc finger, RING/FYVE/PHD-type;
Q10P69.1	Homologous	97	456.206	54.1598	77.6585	B9FCD6.1(199.7);Q2QYJ8.1(194.5);A0A0N7KEU4.1(45.2);A0A0P0XGA4.1(41.0);A0A0P0YCS2.1(38.1);	HTH myb-type domain-containing protein	Homeobox-like domain superfamily;Myb-like transcription factor;Myb domain;		Q69JE8.1(119.4);Q0DF64.1(116.7);B9G9P9.1(116.6);A3AWY9.1(112.9);Q67VZ4.1(109.7);Q652E6.1(108.1);Q6Z414.1(106.5);Q688D6.1(105.6);Q69SH8.1(105.6);Q7XDC7.1(105.2);	Homeobox-like domain superfamily;Myb domain;Myb-like transcription factor;SANT/Myb domain;
Q2QYJ8.1	Homologous	97	456.206	54.1598	77.6585	Q10P69.1(194.4);B9FCD6.1(194.4);A0A0N7KEU4.1(48.0);A0A0P0XGA4.1(42.6);A0A0P0YCS2.1(41.7);	HTH myb-type domain-containing protein	Homeobox-like domain superfamily;Myb-like transcription factor;Myb domain;		Q69JE8.1(119.4);Q0DF64.1(116.7);B9G9P9.1(116.6);A3AWY9.1(112.9);Q67VZ4.1(109.7);Q652E6.1(108.1);Q6Z414.1(106.5);Q688D6.1(105.6);Q69SH8.1(105.6);Q7XDC7.1(105.2);	Homeobox-like domain superfamily;Myb domain;Myb-like transcription factor;SANT/Myb domain;
Q6K906.1	Homologous	120	638.917	50.1875	77.4275	Q2R8Y1.1(73.4);A0A0P0WK81.1(45.0);A0A0P0X6H7.1(33.1);A0A0P0VY52.1(33.1);	Rx_N domain-containing protein	Virus X resistance protein-like, coiled-coil domain;Rx, N-terminal;		Q2R8W6.1(106.1);Q2R8Y8.1(91.7);Q0ITC8.1(79.3);Q84YX3.1(73.0);A0A0P0WZD4.1(68.1);Q2QR00.1(58.9);Q5VN81.1(56.2);A0A0P0VZG5.1(55.2);Q5VP50.1(54.4);	Leucine-rich repeat;Leucine-rich repeat domain superfamily;NB-ARC;P-loop containing nucleoside triphosphate hydrolase;Rx, N-terminal;Virus X resistance protein-like, coiled-coil domain;
A0A0P0X1D6.1	Homologous	126	265.403	61.0492	76.9836	A0A0P0V2S1.1(56.5);	PEROXIDASE_4 domain-containing protein			Q7XIX1.1(119.9);Q7F1U0.1(119.1);Q10ET8.1(118.9);Q0D3N0.1(118.1);Q5Z9B2.1(117.6);Q6ER51.1(117.5);Q5JMS4.1(116.2);Q67VC4.1(115.1);Q6AVZ8.1(114.4);	Haem peroxidase;Haem peroxidase superfamily;Peroxidase, active site;Peroxidases heam-ligand binding site;Plant peroxidase;Secretory peroxidase;Twin-arginine translocation pathway, signal sequence;
A0A0P0WNU2.1	Single-copy	143	85.3816	91.5909	76.5459		Os05g0477800 protein			Q8LR58.1(61.6);Q942E2.1(19.2);Q0J9H5.1(14.7);Q75IR0.1(14.3);	ACT domain;Helix-loop-helix DNA-binding domain superfamily;Myc-type, basic helix-loop-helix (bHLH) domain;SLC26A/SulP transporter;SLC26A/SulP transporter domain;STAS domain;STAS domain superfamily;Sulfate transporter 3.5;Sulphate anion transporter, conserved site;
A0A0P0XEL4.1	Single-copy	98	467.913	53.6745	76.4949		TPR_REGION domain-containing protein	Tetratricopeptide repeat-containing domain;Tetratricopeptide-like helical domain superfamily;		Q6K4H9.1(114.6);Q6K5N5.1(110.6);Q2QML3.1(102.0);Q6K268.1(101.0);A0A0P0XJZ6.1(100.6);A0A0P0W1A9.1(93.6);Q75M28.1(89.7);A0A0N7KHU0.1(87.1);	Ankyrin repeat;Ankyrin repeat-containing domain;Ankyrin repeat-containing domain superfamily;Tetratricopeptide repeat;Tetratricopeptide repeat 2;Tetratricopeptide repeat-containing domain;Tetratricopeptide-like helical domain superfamily;
A0A0P0V7W9.1	Single-copy	110	354.686	57.0509	76.2656		Os01g0734333 protein			Q65XC8.1(61.5);Q69LJ7.1(56.3);Q5ZAJ0.1(50.6);Q2QP56.1(40.7);Q8S1T0.1(40.5);Q0DHH6.1(40.3);	Cytochrome b245, heavy chain;EF-Hand 1, calcium-binding site;EF-hand domain;EF-hand domain pair;FAD-binding 8;FAD-binding domain, ferredoxin reductase-type;Ferredoxin-NADP reductase (FNR), nucleotide-binding domain;Ferric reductase transmembrane component-like domain;Ferric reductase, NAD binding domain;NADPH oxidase Respiratory burst;Respiratory burst oxidase homologue protein B;Riboflavin synth…
A0A0P0XZL5.1	Single-copy	141	166.116	68.3469	76.2085		XRN_N domain-containing protein	5'-3' exoribonuclease;Putative 5-3 exonuclease;		Q6K2K4.1(57.5);Q5N739.1(50.3);Q6F378.1(46.5);	5'-3' exoribonuclease;5'-3' exoribonuclease type 2;Putative 5-3 exonuclease;Xrn1, helical domain;Zinc finger, CCHC-type;Zinc finger, CCHC-type superfamily;
Q6YXY9.1	Single-copy	77	82.5245	94.3779	75.8948		Os02g0138700 protein			Q6YXX3.1(77.8);	Nucleolar protein 8, RNA recognition motif;Nucleotide-binding alpha-beta plait domain superfamily;RNA recognition motif domain;RNA-binding domain superfamily;
A0A0P0Y1U8.1	Single-copy	89	125.201	74.273	75.7752		Os11g0435500 protein	Glycosyl hydrolases 36;		Q8W2G5.2(69.9);Q6ZLJ9.1(17.3);Q6ATP6.1(15.2);	Aldolase-type TIM barrel;Glycoside hydrolase superfamily;Glycosyl hydrolases 36;
A0A0P0VD47.1	Homologous	87	434.747	54.3725	75.3212	A0A0P0V2A4.1(57.6);Q0JN60.1(53.5);A0A0N7KS49.1(42.5);A0A0N7KIG3.1(40.4);	PEROXIDASE_4 domain-containing protein	Haem peroxidase;Haem peroxidase superfamily;Plant peroxidase;Peroxidase, active site;		Q9AS12.1(103.8);Q654S1.1(98.9);Q5U1S8.1(97.1);Q75IS1.1(90.5);Q94DM2.1(89.5);Q8LMR6.1(85.0);Q8W2X2.1(84.8);Q10SI9.1(83.4);	Haem peroxidase;Haem peroxidase superfamily;Peroxidase, active site;Peroxidases heam-ligand binding site;Plant peroxidase;Secretory peroxidase;
A0A0P0YBD3.1	Homologous	113	257.896	61.1062	75.1091	A0A0P0WQG0.1(46.0);A0A0P0XGA4.1(35.7);A0A0P0VX49.1(31.0);	Myb-like domain-containing protein	Homeobox-like domain superfamily;Myb-like domain;SANT/Myb domain;		Q7XUV5.2(106.1);Q6Z414.1(94.9);Q7XBH4.2(92.5);Q2QZJ8.1(88.1);Q6K1S6.1(87.0);A0A0P0XHA2.1(86.4);Q67VZ4.1(85.9);Q6H7S0.1(84.4);Q75LP7.1(83.8);	Homeobox-like domain superfamily;Myb domain;Myb-like transcription factor;SANT/Myb domain;
B9FM06.1	Single-copy	82	97.4453	81.7561	74.4635		Os05g0104750 protein			Q65XJ2.1(33.7);Q6K8K0.1(24.8);Q0DLF7.1(15.6);A0A0P0WPJ7.1(15.3);A0A0P0WV71.1(13.1);	Leucine rich repeat 4;Leucine-rich repeat;Leucine-rich repeat domain superfamily;Leucine-rich repeat, typical subtype;Leucine-rich repeat-containing N-terminal, plant-type;Malectin-like domain;
A0A0P0X403.1	Single-copy	122	206.095	64.2271	74.103		Os07g0233500 protein	Protein of unknown function DUF1677, Oryza sativa;		Q8GRW9.1(63.6);Q10PF3.1(53.0);A0A0P0XDY3.1(47.3);A0A0P0WA48.1(46.0);A0A0P0WA44.1(40.1);A0A0N7KHP3.1(39.6);Q8H3Z2.1(39.0);Q5N884.1(35.7);	Protein of unknown function DUF1677, Oryza sativa;Quinoprotein amine dehydrogenase, beta chain-like;
A0A0P0X6S1.1	Single-copy	120	201.043	64.605	74.0449		Os07g0503400 protein			Q336V9.2(94.7);Q8S7N5.1(55.5);Q10BA8.1(45.4);B9FDE0.1(42.3);Q60EZ1.1(26.9);Q6K958.1(22.4);A0A0P0VQA6.1(16.4);	Protein kinase domain;Protein kinase, ATP binding site;Protein kinase-like domain superfamily;Serine-threonine/tyrosine-protein kinase, catalytic domain;Serine/threonine-protein kinase, active site;Tetratricopeptide repeat-containing domain;Tetratricopeptide-like helical domain superfamily;
A0A0P0X6C3.1	Single-copy	100	74.312	125.685	74.0295		Os07g0515366 protein			Q0JF82.2(45.1);Q6Z6D8.1(13.2);	ADF-H/Gelsolin-like domain superfamily;Agenet domain, plant type;Agenet-like domain;ENT domain;ENT domain-like superfamily;Gelsolin-like domain superfamily;Sec23/Sec24 beta-sandwich;Sec23/Sec24 helical domain superfamily;Sec23/Sec24, helical domain;Sec23/Sec24, trunk domain;Sec24-like, trunk domain;Zinc finger, Sec23/Sec24-type;Zinc finger, Sec23/Sec24-type superfamily;von Willebrand factor A-lik…
A0A0P0Y104.1	Homologous	116	100.487	80.2612	73.9748	A0A0P0WMM0.1(32.1);	Os11g0263200 protein			A0A0N7KIZ3.1(108.0);A0A0P0WA03.1(98.8);Q9LDC2.1(59.8);Q9FWC4.1(18.0);	BRD4-interacting chromatin-remodeling complex-associated protein;Protein PHYTOCHROME KINASE SUBSTRATE;Protein PHYTOCHROME KINASE SUBSTRATE 4;Thioredoxin-like superfamily;UAS;UBA-like superfamily;UBX domain;Ubiquitin-like domain superfamily;
C7J6U9.1	Single-copy	105	267.768	60.3648	73.9505		Os09g0392400 protein			Q8S628.1(99.3);Q5Z9S8.1(19.9);B9GDE5.2(16.7);Q2QV81.3(15.7);Q7FMW4.1(13.5);Q8GU83.1(13.1);	AAA+ ATPase domain;ABC transporter-like;ABC-2 type transporter;ABC-transporter N-terminal domain;ATP-binding cassette transporter, PDR-like subfamily G, domain 1;ATP-binding cassette transporter, PDR-like subfamily G, domain 2;P-loop containing nucleoside triphosphate hydrolase;Plant PDR ABC transporter associated;
A0A0P0W6S2.1	Single-copy	108	161.008	68.3648	73.9366		Os04g0162533 protein	Purine permease, plant;		Q6K5E9.1(89.1);Q6YXG6.1(49.8);Q8H7P2.1(22.7);Q7X6H1.2(19.8);Q6ZGZ0.1(19.5);Q5QLF2.1(17.0);Q6I609.1(16.7);Q7X7S4.2(16.1);	Purine permease, plant;
A0A0P0WVX3.1	Single-copy	90	257.506	60.8789	73.7929		Os06g0299600 protein			Q5ZA47.1(72.7);Q5ZA49.1(69.9);Q5ZA50.1(65.9);A0A0P0WVX6.1(46.3);Q5ZA41.1(45.4);Q7XT17.2(42.8);Q2R5M5.1(29.9);Q7XQF8.2(29.7);Q6K689.1(10.2);	NAD(P)-binding domain superfamily;Pheophorbide a oxygenase;Rieske [2Fe-2S] iron-sulphur domain;Rieske [2Fe-2S] iron-sulphur domain superfamily;Short-chain dehydrogenase/reductase SDR;Short-chain dehydrogenase/reductase, conserved site;
B7F194.1	Homologous	129	588.921	50.514	73.4417	A0A0P0WMW0.1(34.2);Q6Z159.1(30.0);	Inhibitor I9 domain-containing protein	Peptidase S8 propeptide/proteinase inhibitor I9;Peptidase S8 propeptide/proteinase inhibitor I9 superfamily;		A0A0P0W6P0.1(96.6);Q0E256.1(95.2);A0A0P0VHD8.1(94.1);Q6EPJ5.1(92.1);Q8RVA0.1(87.6);Q7XT44.2(85.8);Q0JIK5.1(84.6);Q5ZBR8.1(84.0);	Cucumisin-like catalytic domain;Peptidase S8 propeptide/proteinase inhibitor I9;Peptidase S8 propeptide/proteinase inhibitor I9 superfamily;Peptidase S8, subtilisin, His-active site;Peptidase S8, subtilisin, Ser-active site;Peptidase S8, subtilisin-related;Peptidase S8/S53 domain;Peptidase S8/S53 domain superfamily;Subtilisin-like protease, fibronectin type-III domain;
A0A0P0Y4M9.1	Single-copy	128	77.6452	97.0898	72.7966		Os11g0637900 protein			Q6H6S3.1(17.2);A0A0P0V678.1(17.1);Q10LA2.1(16.8);Q6H530.1(16.0);A0A0P0V4H2.1(15.6);Q0DWE8.1(14.1);	Cytochrome P450;Cytochrome P450 superfamily;Cytochrome P450, E-class, group I;Cytochrome P450, conserved site;G-protein beta WD-40 repeat;Helix-turn-helix motif;Homeobox domain;Homeobox, conserved site;Homeobox-like domain superfamily;Leucine zipper, homeobox-associated;PRP4-like superfamily;Pre-mRNA processing factor 4 (PRP4)-like;Protein CHUP1-like;Protein of unknown function DUF1677, plant;Vac…
A0A0P0XV49.1	Single-copy	104	245.427	61.3404	72.6698		Os10g0435100 protein	MATH/TRAF domain;TRAF-like;		B9G5V7.1(57.4);B9G5V6.1(53.8);Q7XE71.1(52.0);Q7XEG1.1(47.2);A3C513.1(45.3);Q6Z0V7.1(35.5);Q2R115.1(34.1);Q2R0V3.1(33.0);Q7XEA4.1(33.0);	BPM, C-terminal;BTB/POZ domain;MATH/TRAF domain;SKP1/BTB/POZ domain superfamily;TRAF-like;
A0A0P0Y8H3.1	Single-copy	108	85.5092	87.0704	72.3794		Os12g0228600 protein			Q8S0V9.1(18.1);Q10LA2.1(17.9);C7IWJ0.1(16.7);Q5JKR3.1(14.4);B9FI63.1(12.9);Q8LIX0.1(10.6);Q850Z8.1(10.6);	Chaperone J-domain superfamily;Chloride channel, core;Chloride channel, voltage gated;DnaJ domain;DnaJ domain, conserved site;Domain of unknown function DUF1977, DnaJ-like;Era-type guanine nucleotide-binding (G) domain;G-protein beta WD-40 repeat;GTP binding domain;GTP-binding protein Era;K Homology domain, type 2;K homology domain superfamily, prokaryotic type;K homology domain-like, alpha/beta;…
A0A0N7KJF4.1	Single-copy	141	615.603	49.8369	72.3338		Tr-type G domain-containing protein			Q5JMX4.1(79.3);Q6KA61.1(76.2);Q53KX3.1(73.8);Q6ESY0.1(66.7);Q6H4L2.1(65.8);Q7XTK1.2(65.7);Q5JKU5.1(64.9);Q8W0C4.1(62.3);B9F2U5.1(61.8);Q5VQ69.1(60.1);	BipA, domain V;EF-G domain III/V-like;Elongation Factor G, domain II;Elongation factor 4;Elongation factor 4, domain IV;Elongation factor EFG, domain V-like;GTP-binding protein LepA, C-terminal;GTP-binding protein TypA;GTP-binding protein TypA/BipA, C-terminal;LepA, C-terminal domain superfamily;P-loop containing nucleoside triphosphate hydrolase;Ribosomal protein S5 domain 2-type fold;Ribosomal …
Q69IW6.1	Single-copy	91	251.275	60.9154	72.1949		Os08g0311850 protein			A0A0P0WIJ8.1(82.7);Q75HS1.1(50.1);Q5WMS2.1(34.0);Q7X880.1(28.7);Q5Z9G3.1(23.7);Q7EZ34.1(23.2);Q10A61.1(15.0);B9G599.1(14.6);	Chloramphenicol acetyltransferase-like domain superfamily;Transferase;
A0A0P0VVT7.1	Homologous	120	354.524	56.3542	72.1443	A0A0P0YA24.1(152.8);Q2QUF0.1(36.3);	BED-type domain-containing protein	Zinc finger, BED-type;		A0A0P0XUB7.1(112.6);Q0J9W3.1(51.3);A0A0P0XD22.1(38.5);Q75HY5.1(37.4);Q0JMB2.3(36.4);Q6AVI0.1(35.5);B9FJG3.1(33.9);	HAT, C-terminal dimerisation domain;Ribonuclease H-like superfamily;Zinc finger C2H2 superfamily;Zinc finger, BED-type;hAT-like transposase, RNase-H fold;
A0A0P0X095.1	Homologous	106	73.6568	106.104	71.7174	Q0DHU6.1(185.1);	Os06g0669100 protein			Q336P5.1(56.4);Q6H400.1(12.7);	Helix-loop-helix DNA-binding domain superfamily;Malonyl-CoA decarboxylase;Malonyl-CoA decarboxylase, C-terminal;Malonyl-CoA decarboxylase, C-terminal domain superfamily;Malonyl-CoA decarboxylase, N-terminal;Malonyl-CoA decarboxylase, N-terminal domain superfamily;Myc-type, basic helix-loop-helix (bHLH) domain;Transcription factor MYC/MYB N-terminal;
A0A0N7KLY7.1	Single-copy	132	74.8503	101.161	71.6732		Os06g0294775 protein			Q2QZH3.1(16.5);Q6YV37.1(14.2);Q67V82.1(13.6);Q653H7.1(13.0);Q5ZC77.1(12.3);Q2R2L4.1(10.1);	AAA+ ATPase domain;ATPase family AAA domain-containing protein 3;ATPase family AAA domain-containing protein 3, domain of unknown function DUF3523;ATPase, AAA-type, conserved site;ATPase, AAA-type, core;Auxin response factor;B3 DNA binding domain;DNA-binding pseudobarrel domain superfamily;Leucine-rich repeat;Leucine-rich repeat domain superfamily;Leucine-rich repeat, typical subtype;Leucine-rich…
Q5Z8X3.1	Homologous	61	192.718	64.7475	71.6189	A0A0P0VER5.1(34.7);	Os06g0702000 protein			Q69LJ9.1(70.7);Q7XPF1.2(66.0);Q5JKG8.1(63.3);Q6K613.1(54.6);Q7XM22.2(53.0);Q6H664.1(52.1);Q0JBE8.1(47.9);B7F8P5.1(36.0);A0A0P0VWA3.1(24.6);	Small auxin-up RNA;
A0A0P0XTU5.1	Single-copy	108	71.9505	115.121	71.1694		Os10g0381800 protein			Q6YZD8.1(15.2);Q69IX0.1(14.8);A0A0P0VFB8.1(13.7);Q7XC47.2(12.4);Q5Z6E5.1(12.0);Q6H7M7.2(11.4);	Bacterial surface antigen (D15);Cellulose synthase;Cyclin-like superfamily;Domain of unknown function DUF630;Domain of unknown function DUF632;Nitrate regulatory gene2 protein;Nucleotide-diphospho-sugar transferases;POTRA domain;POTRA domain, BamA/TamA-like;Protein BRANCHLESS TRICHOME;Retrieval of early ER protein Rer1;Surface antigen D15-like;Transcription factor TFIIB;
A0A0P0X5F6.1	Single-copy	120	393.726	54.75	70.3693		Os07g0403800 protein			Q6AVV6.1(112.3);Q6Z4I4.1(73.5);Q69LA3.1(55.2);Q9FU86.1(50.9);Q5N7W6.1(50.7);Q5Z6P7.1(46.9);Q6ZGW7.1(46.8);Q7XBS8.1(44.5);	MFS transporter superfamily;PTR2 family proton/oligopeptide symporter, conserved site;Proton-dependent oligopeptide transporter family;
A0A0P0WST9.1	Single-copy	69	388.312	54.8886	70.1948		HTH myb-type domain-containing protein			Q8S282.1(55.6);Q0DHL1.1(46.2);Q84SF0.1(44.8);Q8LLP3.1(42.0);Q0J3I9.1(41.2);A0A0P0XGE9.1(40.9);Q0JHU7.1(40.6);Q5NBM8.2(40.3);A0A0P0VAQ0.1(39.7);Q2R933.1(38.5);	Homeobox-like domain superfamily;Myb domain;Myb-like transcription factor;SANT/Myb domain;
Q6H468.1	Homologous	147	585.686	50.0068	69.8573	Q2HWH1.1(217.9);Q6K9T0.1(176.6);Q2HWG0.1(116.7);Q8GVV6.1(116.2);Q2HWG1.1(115.7);Q7XN30.2(33.9);Q75KW7.1(31.0);	Two-component response regulator ORR11	CheY-like superfamily;Signal transduction response regulator, receiver domain;		A1A698.1(88.9);Q0D3B6.1(87.6);Q10N34.1(85.2);A1A699.1(82.3);Q5SML5.1(79.5);Q5N6V8.2(78.8);Q67W50.1(78.1);Q689G6.1(77.6);Q6K8X6.1(76.3);	CCT domain;CHASE domain;CheY-like superfamily;Histidine kinase domain;Histidine kinase/HSP90-like ATPase;Histidine kinase/HSP90-like ATPase superfamily;Homeobox-like domain superfamily;Myb domain;Myb domain, plants;Response regulator B-type, plant;SANT/Myb domain;Signal transduction histidine kinase, dimerisation/phosphoacceptor domain;Signal transduction histidine kinase, dimerisation/phosphoacc…
Q2QR43.1	Single-copy	146	183.837	65.1007	69.8414		Os12g0473700 protein			Q2QTX9.1(105.5);Q10RP4.2(25.7);Q5N712.1(14.8);	JmjC domain;JmjN domain;Zinc finger C2H2 superfamily;Zinc finger C2H2-type;
A0A0P0VYU6.1	Homologous	105	600.526	49.7181	69.826	A0A0N7KQ49.1(46.8);	Os03g0379000 protein			Q69PR8.1(90.5);Q6ZIQ9.1(82.9);Q0DY65.1(77.0);Q5VNF2.1(68.1);Q6L4L2.1(58.3);Q7XSW3.2(53.6);A0A0P0YAB3.1(52.5);A0A0N7KQF2.1(51.9);Q53KU9.1(49.1);	Concanavalin A-like lectin/glucanase domain superfamily;Legume lectin domain;Legume lectin, beta chain, Mn/Ca-binding site;Protein kinase domain;Protein kinase, ATP binding site;Protein kinase-like domain superfamily;S-receptor-like serine/threonine-protein kinase;Serine-threonine/tyrosine-protein kinase, catalytic domain;Serine/threonine-protein kinase, active site;
A0A0P0WML9.1	Single-copy	76	70.704	112.354	69.6952		Os05g0429050 protein			Q10NY1.1(14.4);Q7G761.1(14.3);Q0IVV9.1(13.6);Q6AT64.1(13.2);Q5ZEM4.1(12.1);	Ankyrin repeat;Ankyrin repeat-containing domain;Ankyrin repeat-containing domain superfamily;Chorismate synthase;Chorismate synthase AroC superfamily;Chorismate synthase, conserved site;Immunoglobulin-like fold;MFS transporter superfamily;Major sperm protein (MSP) domain;PTR2 family proton/oligopeptide symporter, conserved site;PapD-like superfamily;Pectinacetylesterase/NOTUM;Protein of unknown f…
A0A0P0WGM7.1	Homologous	129	574.514	50.1674	69.5002	A0A0P0WKV1.1(73.7);Q5N735.1(70.9);C7J804.1(68.6);A0A0P0WE69.1(46.5);A0A0P0WL68.1(36.1);	Os04g0691366 protein	MFS transporter superfamily;Proton-dependent oligopeptide transporter family;		Q9FU86.1(118.4);A0A0P0WML3.1(116.5);Q6I5V4.1(115.3);Q5N747.1(115.2);Q5N734.1(114.3);Q6YVW2.1(114.2);Q10PF8.1(114.0);Q0JHC1.2(113.8);Q5N733.1(112.7);A0A0P0VAX0.1(111.1);	MFS transporter superfamily;PTR2 family proton/oligopeptide symporter, conserved site;Proton-dependent oligopeptide transporter family;
A0A0N7KLN6.1	Single-copy	86	91.212	81.5791	69.408		Os06g0186600 protein			Q0E3X4.2(21.0);Q67V82.1(18.5);Q0D3S3.1(18.1);Q7EZC8.1(15.5);A0A0P0V413.1(15.2);	Agenet domain, plant type;Agenet-like domain;DEAD/DEAH box helicase domain;GTP binding domain;GTP-binding protein OBG, C-terminal;GTP-binding protein OBG, C-terminal domain superfamily;GTP-binding protein Obg/CgtA;GTP1/OBG domain;GTP1/OBG domain superfamily;GTP1/OBG, conserved site;Helicase superfamily 1/2, ATP-binding domain;Helicase, C-terminal;OBG-type guanine nucleotide-binding (G) domain;P-l…
A0A0P0VHY3.1	Homologous	150	108.533	75.6867	69.2932	B9GDI5.1(57.9);A3CI25.1(55.2);A0A0P0X4D4.1(37.2);A0A0P0XZS4.1(32.7);A0A0P0XBZ2.1(31.0);B9FCI9.1(30.5);	F-box domain-containing protein	F-box-like domain superfamily;F-box domain;Leucine-rich repeat domain superfamily;		Q2QQE3.1(82.9);Q8GVM0.1(71.0);Q7XSL8.2(70.8);	F-box domain;F-box-like domain superfamily;FBD domain;Leucine-rich repeat domain superfamily;
B9FZA5.1	Homologous	96	700.757	47.8521	68.9755	A0A0P0Y4B2.1(62.8);A0A0P0Y8W7.1(34.0);	Rx_N domain-containing protein	Virus X resistance protein-like, coiled-coil domain;Rx, N-terminal;Mitochondrial import inner membrane translocase subunit Tim8/13;		Q2QNU4.1(118.5);Q2QPV5.1(118.3);A0A0N7KNA1.1(117.9);A0A0P0XR33.1(117.7);Q2R1X5.1(113.5);Q2QNU7.1(110.2);	Leucine-rich repeat domain superfamily;NB-ARC;P-loop containing nucleoside triphosphate hydrolase;Rx, N-terminal;Virus X resistance protein-like, coiled-coil domain;
A0A0P0XZP2.1	Single-copy	149	92.56	80.5174	68.5971		PI3K/PI4K domain-containing protein			Q5Z885.1(36.4);A0A0P0V079.1(34.7);Q6K881.1(33.2);Q6I5E0.1(31.4);	Phosphatidylinositol 3-/4-kinase, catalytic domain;Protein kinase-like domain superfamily;Ubiquitin domain;Ubiquitin-like domain superfamily;
A0A0N7KKB1.1	Single-copy	127	155.342	67.6362	68.5337		Os05g0202000 protein			Q69XK5.1(23.8);Q6YVM4.1(19.3);Q69V23.1(19.0);Q851L8.1(18.5);Q9AV71.1(17.5);Q5JN63.1(17.0);	Cellulose synthase;Cellulose synthase, RING-type zinc finger;Nucleotide-diphospho-sugar transferases;Zinc finger, RING-type;Zinc finger, RING/FYVE/PHD-type;
A0A0P0XCN1.1	Single-copy	119	80.0194	87.837	68.5089		Os08g0186800 protein			A0A0N7KG46.1(118.3);Q7XGT7.1(31.6);Q337L5.1(19.1);Q5N734.1(15.6);A0A0P0WML3.1(12.5);	MFS transporter superfamily;PTR2 family proton/oligopeptide symporter, conserved site;Proton-dependent oligopeptide transporter family;
B9FFJ7.1	Homologous	75	473.878	52.2	68.382	A0A0P0WWA7.1(86.1);A0A0P0VBS2.1(62.2);A0A0P0W5T9.1(61.7);A3CGM8.1(45.5);A0A0N7KIY8.1(33.1);	MADS-box domain-containing protein	MADS MEF2-like;Transcription factor, MADS-box;Transcription factor, MADS-box superfamily;		Q40704.1(119.4);Q8RU31.1(119.4);Q2V0P1.1(118.7);Q2QW53.2(109.3);Q9XJ60.1(109.1);Q6Q9H6.2(106.8);Q5K4R0.3(104.6);Q6H711.1(104.5);Q6EU39.1(104.5);P0C5B2.1(102.6);	MADS MEF2-like;Protein TRANSPARENT TESTA 16-like;Transcription factor, K-box;Transcription factor, MADS-box;Transcription factor, MADS-box superfamily;
Q0DA26.1	Single-copy	91	120.425	72.6879	68.2566		C3H1-type domain-containing protein	Zinc finger, CCCH-type;Zinc finger, CCCH-type superfamily;		Q84UQ3.1(38.3);Q69XQ3.1(34.3);Q7F8R0.1(30.5);Q0DYP5.2(17.0);A0A0N7KJC3.1(13.7);Q1EHT7.1(11.8);	AAA+ ATPase domain;DEAD/DEAH box helicase domain;E3 ligase, CCCH-type zinc finger;G-protein beta WD-40 repeat;Helicase superfamily 1/2, ATP-binding domain;Helicase, C-terminal;K Homology domain;K Homology domain, type 1;K Homology domain, type 1 superfamily;P-loop containing nucleoside triphosphate hydrolase;Ssl1-like;TFIIH C1-like domain;TFIIH subunit Ssl1/p44;WD40 repeat;WD40 repeat, conserved …
A3BQY7.1	Homologous	113	185.633	64.5558	68.1566	Q338X5.1(199.1);	Os08g0236000 protein	Protein of unknown function DUF3475;		Q65XG5.1(77.7);Q10AB4.1(49.8);Q5Z9P3.1(38.0);Q5TKI6.1(29.8);Q7XUZ4.2(27.1);	Protein of unknown function DUF3475;Protein of unknown function DUF668;
A0A0P0Y7V8.1	Single-copy	90	73.1187	95.7233	67.9316		Os12g0191901 protein			Q7XC54.1(14.8);Q0JCU7.1(13.1);Q2QV94.1(12.9);Q6YTR7.1(12.7);Q5NBR9.1(12.4);	DNA-binding domain superfamily;Exocyst complex component EXOC5/Sec10;Exocyst complex component Sec10-like;FAD-binding domain;FAD/NAD(P)-binding domain superfamily;Forkhead-associated (FHA) domain;HD-ZIP protein, N-terminal;Homeobox domain;Homeobox, conserved site;Homeobox-like domain superfamily;Leucine zipper, homeobox-associated;Leucine-rich repeat;Leucine-rich repeat domain superfamily;Leucine…
A0A0P0X7M6.1	Single-copy	107	552.02	50.3355	67.7719		Os07g0567200 protein	Cytochrome P450;Cytochrome P450, conserved site;Cytochrome P450, E-class, group IV;Cytochrome P450 superfamily;		A0A0P0WME8.1(115.7);A0A0P0WMF4.1(104.8);Q6Z6U3.1(104.7);Q6ZH24.1(97.8);Q2R3E2.1(96.2);A0A0P0X842.1(95.6);Q8GTY5.1(93.3);A0A0P0WZ62.1(39.2);Q69NG7.1(38.1);	Cytochrome P450;Cytochrome P450 superfamily;Cytochrome P450, E-class, group I;Cytochrome P450, E-class, group IV;Cytochrome P450, conserved site;
Q0JB93.1	Homologous	150	482.27	51.8733	67.6702	A0A0P0UYI3.1(37.3);	Protein kinase domain-containing protein			Q8H811.1(117.2);Q6MWE1.1(111.2);Q0J1Z3.1(102.7);Q9ASD8.1(87.7);A0A0P0WZK4.1(81.7);A0A0N7KQF2.1(80.7);Q2QLL2.1(79.4);Q6AUA1.1(76.5);	Concanavalin A-like lectin/glucanase domain superfamily;LRR receptor-like serine/threonine-protein kinase FEI1/2;Legume lectin domain;Leucine-rich repeat;Leucine-rich repeat domain superfamily;Leucine-rich repeat-containing N-terminal, plant-type;Protein kinase domain;Protein kinase, ATP binding site;Protein kinase-like domain superfamily;Serine-threonine/tyrosine-protein kinase, catalytic domain…
A0A0P0XS63.1	Single-copy	71	120.993	72.372	67.6379		Os10g0131750 protein			Q8H7U1.1(21.4);Q76FS2.1(20.2);P46265.1(19.8);P45960.1(19.7);Q76FS3.1(19.7);	Beta tubulin;Beta tubulin, autoregulation binding site;Tubulin;Tubulin, C-terminal;Tubulin, conserved site;Tubulin/FtsZ, 2-layer sandwich domain;Tubulin/FtsZ, C-terminal;Tubulin/FtsZ, C-terminal domain superfamily;Tubulin/FtsZ, GTPase domain;Tubulin/FtsZ, GTPase domain superfamily;
A0A0P0W7C9.1	Homologous	52	612.446	49.0365	67.0337	Q0JNL7.1(74.3);Q0JNS6.2(74.0);Q6F332.3(73.1);A0A0P0VH48.1(69.6);A0A0N7KEZ6.1(62.9);A0A0P0VH44.1(60.6);A0A0P0W6N1.1(59.1);A0A0P0W9H3.1(45.7);A0A0P0VGE2.1(39.9);	Os04g0205000 protein			B9FKW9.1(99.9);Q6F3A6.1(96.1);Q6K968.1(95.2);Q7XSQ5.2(95.0);Q6I587.1(94.7);	EF-Hand 1, calcium-binding site;EF-hand domain;EF-hand domain pair;Protein kinase domain;Protein kinase, ATP binding site;Protein kinase-like domain superfamily;Serine/threonine-protein kinase, active site;
A0A0P0WT65.1	Single-copy	80	67.7425	114.55	66.9644		Os06g0184834 protein			Q67U60.1(16.4);Q852F6.1(16.3);Q7XXN2.1(13.5);P0C132.1(10.4);	ACT domain;AUX/IAA domain;AUX/IAA protein;Alpha/Beta hydrolase fold;Lecithin:cholesterol/phospholipid:diacylglycerol acyltransferase;PB1 domain;Protein kinase domain;Protein kinase-like domain superfamily;Serine-threonine/tyrosine-protein kinase, catalytic domain;Serine/threonine-protein kinase, active site;Zinc/iron permease;
A0A0P0XL60.1	Single-copy	118	77.2662	88.5305	66.7955		Os09g0334401 protein	Purine permease, plant;		Q7X7S4.2(106.0);Q7X6H1.2(26.5);Q6ZGZ0.1(15.7);	Purine permease, plant;
Q0DHU6.1	Homologous	106	73.6568	92.7566	66.795	A0A0P0X095.1(184.1);	Os05g0439100 protein			Q336P5.1(56.4);Q6H400.1(12.7);	Helix-loop-helix DNA-binding domain superfamily;Malonyl-CoA decarboxylase;Malonyl-CoA decarboxylase, C-terminal;Malonyl-CoA decarboxylase, C-terminal domain superfamily;Malonyl-CoA decarboxylase, N-terminal;Malonyl-CoA decarboxylase, N-terminal domain superfamily;Myc-type, basic helix-loop-helix (bHLH) domain;Transcription factor MYC/MYB N-terminal;
A3CBE1.1	Single-copy	147	318.352	56.7327	66.7584		Rx_N domain-containing protein	Rx, N-terminal;		A0A0P0W0G4.1(70.5);Q5QLX2.1(44.3);A3BIJ9.1(41.7);A0A0P0XJZ1.1(38.4);Q10M36.1(29.7);A0A0P0W5F4.1(26.5);Q7XVK6.2(26.1);Q0J400.1(25.6);	Leucine-rich repeat domain superfamily;NB-ARC;P-loop containing nucleoside triphosphate hydrolase;Rx, N-terminal;Virus X resistance protein-like, coiled-coil domain;
A0A0N7KNQ8.1	Single-copy	72	109.441	74.4681	66.7459		Os07g0576600 protein			A0A0P0WQK6.1(99.9);	WEB family;
A0A0P0XWZ2.1	Single-copy	91	86.4285	82.1989	66.7266		Os10g0521801 protein			A0A0P0Y813.1(20.2);Q5ZC77.1(13.1);Q8W342.1(11.6);Q6ZKI7.1(11.0);Q2QZH3.1(10.8);	DYW domain;HAT, C-terminal dimerisation domain;Pentatricopeptide repeat;Protein arginine methyltransferase NDUFAF7;Protein arginine methyltransferase NDUFAF7 superfamily;Ribonuclease H-like superfamily;S-adenosyl-L-methionine-dependent methyltransferase;Tetratricopeptide-like helical domain superfamily;VWA-Hint protein, Vwaint domain;Zinc finger, FYVE/PHD-type;Zinc finger, PHD-finger;Zinc finger,…
B9G494.1	Homologous	95	745.027	46.7547	66.3909	A0A0P0WV25.1(165.1);	Os09g0485700 protein			Q69NA4.1(68.4);Q6K4P7.1(68.3);A0A0P0XNE5.1(66.9);A0A0P0XLY5.1(66.7);Q69KK7.1(65.5);Q69KL0.1(63.9);Q69L07.1(62.2);Q69L11.1(58.4);B9G3Q7.1(57.7);A0A0N7KLP1.1(53.6);	GPCR, family 3;Ionotropic glutamate receptor;Ionotropic glutamate receptor, plant;Leucine-binding protein domain;Periplasmic binding protein-like I;Receptor, ligand binding region;Solute-binding protein family 3/N-terminal domain of MltF;
Q0JHK5.1	Single-copy	107	513.628	50.8458	65.936		Os01g0858200 protein			Q6I5X9.1(111.7);Q5Z9X4.1(59.9);Q7XIR8.1(55.7);Q69TI6.1(53.2);Q10MC6.1(49.1);Q5QNI3.1(45.3);Q2R6C2.1(39.1);Q6Z742.1(34.4);	AAA+ ATPase domain;DEAD/DEAH box helicase domain;DNA/RNA helicase, ATP-dependent, DEAH-box type, conserved site;Domain of unknown function DUF1605;Helicase superfamily 1/2, ATP-binding domain;Helicase, C-terminal;Helicase-associated domain;Nucleic acid-binding, OB-fold;P-loop containing nucleoside triphosphate hydrolase;RNA-binding domain, S1;S1 domain;
C7J5J8.1	Single-copy	61	214.143	61.882	65.8502		RNA_pol_Rpb1_4 domain-containing protein			A0A0P0WI29.1(50.3);Q7X881.2(36.4);Q9LWK1.1(17.2);Q84SZ1.1(15.7);Q69WS1.1(15.5);Q10RB1.1(15.0);Q69SJ1.1(12.8);	DNA-directed RNA polymerase III subunit RPC1, C-terminal;DNA-directed RNA polymerase III subunit RPC1, N-terminal;Longin domain;Longin-like domain superfamily;RNA polymerase II, heptapeptide repeat, eukaryotic;RNA polymerase Rpb1, domain 1;RNA polymerase Rpb1, domain 3;RNA polymerase Rpb1, domain 3 superfamily;RNA polymerase Rpb1, domain 4;RNA polymerase Rpb1, domain 5;RNA polymerase Rpb1, domain…
A0A0P0Y325.1	Single-copy	110	465.579	51.9618	65.8267		Chal_sti_synt_C domain-containing protein	Chalcone/stilbene synthase, C-terminal;Polyketide synthase, type III;Thiolase-like;		A0A0P0XSB0.1(118.6);A0A0P0WJ73.1(118.4);Q7XGM8.1(118.0);Q0DJY7.1(117.2);Q6L4H9.1(116.6);Q6ZIJ3.1(112.1);Q8LIL0.2(111.6);Q2R3A8.1(109.8);	Chalcone/stilbene synthase, C-terminal;Chalcone/stilbene synthase, N-terminal;Polyketide synthase, type III;Thiolase-like;
A0A0P0VEC0.1	Single-copy	63	143.161	68.227	65.2516		eIF-3c_N domain-containing protein			Q84LG6.1(98.8);	Eukaryotic translation initiation factor 3 subunit C;Eukaryotic translation initiation factor 3 subunit C, N-terminal domain;Proteasome component (PCI) domain;Winged helix DNA-binding domain superfamily;Winged helix-like DNA-binding domain superfamily;
B9FXN6.1	Single-copy	94	223.592	61.1309	65.2323		Gnk2-homologous domain-containing protein	Gnk2-homologous domain;		Q84S65.1(30.0);A0A0P0X777.1(29.1);Q7F1L6.1(25.5);Q0D4F7.1(24.2);A0A0P0X6S6.1(24.1);Q0D5T4.1(24.1);Q5Z8B7.1(22.3);	Gnk2-homologous domain;Gnk2-homologous domain superfamily;Protein kinase domain;Protein kinase, ATP binding site;Protein kinase-like domain superfamily;Serine-threonine/tyrosine-protein kinase, catalytic domain;Serine/threonine-protein kinase, active site;
A0A0P0VPU3.1	Single-copy	138	65.3606	112.994	64.4851		Os02g0759600 protein			Q6AT72.1(23.0);Q53LV0.1(17.8);Q2QQE3.1(15.7);Q6YUS6.1(14.9);Q7XQQ1.1(14.8);	ACT domain;F-box domain;F-box-like domain superfamily;FBD domain;Leucine-rich repeat domain superfamily;Magnesium transporter MRS2-like;PDZ domain;PDZ superfamily;Peptidase S1, PA clan;Peptidase S1C;Protease Do-like, PDZ domain;Protein kinase domain;Protein kinase-like domain superfamily;Serine-threonine/tyrosine-protein kinase, catalytic domain;Serine/threonine-protein kinase, active site;The fa…
A0A0P0WMM0.1	Homologous	138	71.1347	91.9652	64.0167	A0A0P0Y104.1(31.5);	Os05g0431200 protein			A0A0N7KIZ3.1(108.0);A0A0P0WA03.1(98.8);Q9LDC2.1(59.8);Q9FWC4.1(18.0);	BRD4-interacting chromatin-remodeling complex-associated protein;Protein PHYTOCHROME KINASE SUBSTRATE;Protein PHYTOCHROME KINASE SUBSTRATE 4;Thioredoxin-like superfamily;UAS;UBA-like superfamily;UBX domain;Ubiquitin-like domain superfamily;
A0A0P0X4Z8.1	Single-copy	140	92.187	78.14	63.882		Os07g0239734 protein			A0A0P0XHH9.1(68.4);A0A0P0XPI1.1(49.6);Q338Z7.1(16.9);Q6YVY6.1(15.9);A0A0P0XL91.1(14.5);	Cupin-like domain 8;Ethylene-responsive binding factor-associated repression;Homeobox domain;Homeobox, conserved site;Homeobox-like domain superfamily;Jas TPL-binding domain;JmjC domain;Leucine zipper, homeobox-associated;Leucine-rich repeat domain superfamily;NB-ARC;Ninja family;P-loop containing nucleoside triphosphate hydrolase;Putative nuclear localisation signal;VQ;
A0A0P0V2K0.1	Single-copy	112	123.171	70.7384	63.858		Os01g0358900 protein			Q852M0.1(89.0);Q6H3Y7.1(66.0);Q33E23.1(64.2);	Glutamate dehydrogenase;Glutamate/phenylalanine/leucine/valine dehydrogenase;Glutamate/phenylalanine/leucine/valine dehydrogenase, C-terminal;Glutamate/phenylalanine/leucine/valine dehydrogenase, dimerisation domain;Leu/Phe/Val dehydrogenases active site;NAD(P) binding domain of glutamate dehydrogenase;NAD(P)-binding domain superfamily;
C7J3K3.1	Homologous	84	855.726	44.794	63.6891	C7J804.1(35.1);	Os06g0324150 protein	Proton-dependent oligopeptide transporter family;		Q93VE2.1(106.7);A0A0P0X150.1(106.3);C7J4D2.1(104.8);Q5Z8U7.1(103.7);Q6ZGY3.1(103.4);A0A0P0X0M0.1(100.5);Q0DTN6.1(97.6);Q10PF8.1(95.6);Q6ZGW7.1(95.0);Q9FU86.1(92.6);	MFS transporter superfamily;PTR2 family proton/oligopeptide symporter, conserved site;Proton-dependent oligopeptide transporter family;
A0A0P0V103.1	Single-copy	65	111.778	72.7723	63.5871		Os01g0278100 protein			Q5SND9.1(15.6);A0A0P0WMZ6.1(14.6);A0A0P0VM16.1(14.5);Q7XC57.1(14.1);A0A0P0WFD5.1(13.7);Q6ZDM0.1(13.4);Q10HP5.1(11.5);	FHY3/FAR1 family;Homeobox-like domain superfamily;Myb domain;Myb domain, plants;SANT/Myb domain;Zinc finger, CCHC-type;Zinc finger, PMZ-type;Zinc finger, SWIM-type;
A3C255.1	Single-copy	146	101.625	74.9959	63.2474		Os10g0124600 protein	Chaperone J-domain superfamily;		Q94H83.1(40.9);Q6K2F0.1(27.1);Q8RYF9.1(22.2);Q67VC1.1(17.3);	Armadillo;Armadillo-like helical;Armadillo-type fold;Chaperone J-domain superfamily;DnaJ domain;DnaJ domain, conserved site;Domain of unknown function DUF3444;U box domain;Zinc finger, RING/FYVE/PHD-type;
A0A0N7KJG6.1	Homologous	129	95.0783	76.7629	63.0283	A0A0P0V996.1(104.2);A0A0P0UYJ4.1(83.0);	Os04g0549000 protein	Chloramphenicol acetyltransferase-like domain superfamily;		Q8LND6.1(114.7);A0A0P0WSB6.1(17.5);A0A0P0WFM9.1(14.9);Q0J9P7.1(13.9);Q5VP55.1(13.8);A0A0P0W0F4.1(13.1);	Chloramphenicol acetyltransferase-like domain superfamily;Late embryogenesis abundant protein At5g17165-like;Transferase;
A0A0P0XWZ4.1	Homologous	147	200.673	62.185	63.0108	A0A0P0VJN9.1(49.8);	Os10g0551000 protein			Q10NG1.1(79.0);A0A0P0VVX1.1(65.3);Q10SF6.1(58.7);Q7XQ75.1(55.7);Q6EPN2.1(54.9);Q8LN26.1(52.9);A0A0P0XX76.1(44.2);Q6ZJW6.1(21.7);	Protein of unknown function DUF604;
A0A0P0UYJ4.1	Homologous	119	62.7592	139.947	62.7017	A0A0N7KJG6.1(83.8);	Os01g0169600 protein			Q8LND6.1(119.3);	Chloramphenicol acetyltransferase-like domain superfamily;Transferase;
A0A0P0WJI7.1	Homologous	102	569.233	49.1069	62.6952	A0A0P0VIS7.1(44.7);A0A0P0YA24.1(30.1);	Os05g0223100 protein	Zinc finger BED domain;		A0A0P0WJI1.1(119.0);A0A0P0VZA9.1(95.0);Q0JK40.1(70.5);A0A0P0X6L2.1(58.4);A0A0P0XUP5.1(57.6);A0A0P0VJT3.1(57.5);Q6AVI0.1(52.9);B9FJG3.1(52.7);	HAT, C-terminal dimerisation domain;Ribonuclease H-like superfamily;Zinc finger C2H2 superfamily;Zinc finger, BED-type;hAT-like transposase, RNase-H fold;
A0A0P0XEG1.1	Homologous	71	531.366	49.7239	61.8163	A0A0P0VCL8.1(34.1);	Inhibitor I9 domain-containing protein	Peptidase S8 propeptide/proteinase inhibitor I9;		A0A0P0VYZ5.1(63.6);Q0D3H9.1(62.4);Q8RVC2.1(40.7);Q8H047.1(39.5);Q10RX3.1(34.0);Q7XPR8.2(33.3);B9GCW9.1(28.6);Q9LJ20.1(25.3);Q6ESH8.1(24.7);Q7XPR9.2(24.2);	Cucumisin-like catalytic domain;PA domain;Peptidase S8 propeptide/proteinase inhibitor I9;Peptidase S8 propeptide/proteinase inhibitor I9 superfamily;Peptidase S8, subtilisin, Asp-active site;Peptidase S8, subtilisin, Ser-active site;Peptidase S8, subtilisin-related;Peptidase S8/S53 domain;Peptidase S8/S53 domain superfamily;Subtilisin-like protease, fibronectin type-III domain;
A0A0P0YBC2.1	Single-copy	73	84.6848	79.9411	61.8114		Os12g0562650 protein			Q5W727.1(17.3);Q75IT7.1(14.5);Q7X7L3.2(13.1);Q6Z248.1(12.9);Q5SMV5.1(12.8);	Acyl-CoA N-acyltransferase;Alpha/Beta hydrolase fold;ELP3/YhcC;Elongator complex protein 3-like;Elp3/MiaB/NifB;F-box protein EID1-like;F-box-like domain superfamily;GNAT domain;Helix-turn-helix motif;Homeobox domain;Homeobox, conserved site;Homeobox-like domain superfamily;Leucine zipper, homeobox-associated;Peptidase S10, serine carboxypeptidase;Radical SAM;Radical SAM, C-terminal extension;Radi…
A0A0P0VFL6.1	Single-copy	86	232.701	59.7791	61.5773		Os02g0182600 protein			Q60EZ1.1(58.0);Q688N0.1(56.1);Q6Z3X8.1(39.1);Q10QT7.1(39.1);Q84VG3.1(38.6);	Leucine-rich repeat;Leucine-rich repeat domain superfamily;Leucine-rich repeat, typical subtype;Leucine-rich repeat-containing N-terminal, plant-type;Protein kinase domain;Protein kinase, ATP binding site;Protein kinase-like domain superfamily;Serine-threonine/tyrosine-protein kinase, catalytic domain;Serine/threonine-protein kinase, active site;
Q0J3J0.1	Single-copy	68	155.611	65.4779	60.5071		RRM domain-containing protein			A0A0P0WGS4.1(42.8);A0A0N7KSQ1.1(29.2);Q33B10.1(25.1);Q2R134.1(22.4);	Nucleotide-binding alpha-beta plait domain superfamily;RNA recognition motif domain;RNA recognition motif domain, eukaryote;RNA-binding domain superfamily;
A0A0P0W3T1.1	Single-copy	148	114.235	71.1676	60.4483		G domain-containing protein	GTP binding domain;P-loop containing nucleoside triphosphate hydrolase;		Q6Z1J6.1(23.7);Q8S694.1(22.4);Q5ZCV4.1(19.4);Q6ZJ99.1(19.2);Q7XI68.1(18.3);Q851Q6.1(17.2);Q0D3S3.1(15.7);Q2QZ37.1(15.6);	AAA+ ATPase domain;ABC transporter, conserved site;ABC transporter-like;Beta-grasp domain superfamily;Circularly permuted (CP)-type guanine nucleotide-binding (G) domain;Era-type guanine nucleotide-binding (G) domain;GTP binding domain;GTP binding protein, second domain;GTP-binding protein Era;GTP-binding protein OBG, C-terminal;GTP-binding protein OBG, C-terminal domain superfamily;GTP-binding p…
Q0J1H2.1	Homologous	65	233.641	59.4462	60.3244	A0A0P0X0H8.1(87.0);A0A0P0W440.1(56.9);A0A0P0UXQ6.1(55.4);A0A0P0Y6J7.1(33.9);A0A0P0VIS2.1(31.8);A0A0N7KK07.1(31.3);A0A0P0VEX3.1(30.7);	Os09g0440000 protein			A0A0P0UX91.1(89.4);A0A0P0XD22.1(86.1);	HAT, C-terminal dimerisation domain;Protein kinase domain;Protein kinase, ATP binding site;Protein kinase-like domain superfamily;Ribonuclease H-like superfamily;Serine/threonine-protein kinase, active site;Wall-associated receptor kinase, galacturonan-binding domain;Zinc finger C2H2 superfamily;Zinc finger, BED-type;hAT-like transposase, RNase-H fold;
A0A0P0W1Y5.1	Single-copy	130	315.515	55.5147	60.0196		RSN1_TM domain-containing protein	Calcium permeable stress-gated cation channel 1, N-terminal transmembrane domain;		Q75GI5.1(111.4);Q5JKX1.1(59.5);Q5TKG1.1(35.7);Q5JLH8.1(34.4);Q2QN15.1(31.9);Q6AU79.1(29.0);Q7XBT3.1(26.6);	10TM putative phosphate transporter, cytosolic domain;Calcium permeable stress-gated cation channel 1, N-terminal transmembrane domain;Calcium-dependent channel, 7TM region, putative phosphate;
Q0J072.1	Single-copy	149	144.827	66.5376	60.0008		RRM domain-containing protein	Nucleotide-binding alpha-beta plait domain superfamily;RNA-binding domain superfamily;RNA recognition motif domain;		A0A0P0WGS4.1(65.1);Q6K271.1(34.1);A0A0N7KSQ1.1(32.7);Q6YYV1.1(32.6);	Nucleotide-binding alpha-beta plait domain superfamily;PABC (PABP) domain;Paraneoplastic encephalomyelitis antigen;Polyadenylate binding protein, human types 1, 2, 3, 4;Polyadenylate-binding protein/Hyperplastic disc protein;RNA recognition motif domain;RNA recognition motif domain, eukaryote;RNA-binding domain superfamily;WW domain;WW domain superfamily;
Q10RG2.1	Homologous	94	94.0764	75.6309	59.9423	Q337Z8.1(145.9);A0A0N7KHS5.1(114.7);A0A0P0WPD5.1(100.3);Q94GP7.1(87.3);Q69K56.1(61.4);A0A0P0WPW4.1(52.1);	Expressed protein	Protein of unknown function DUF1677, plant;		Q5QN00.1(114.6);Q6H530.1(114.2);A0A0P0UZB5.1(96.7);A0A0P0WXZ6.1(90.8);Q84MQ2.1(89.6);	Protein of unknown function DUF1677, plant;
A0A0P0V1S7.1	Single-copy	139	67.986	89.9525	59.848		CCHC-type domain-containing protein			Q6YUR8.1(35.4);Q84UR8.1(26.3);Q65XV7.1(20.1);A0A0P0WDK4.1(16.7);Q2QNI2.2(15.7);Q75LJ7.1(15.1);	Cold shock domain;Cold-shock (CSD) domain;Cold-shock protein, DNA-binding;NFACT protein, C-terminal;NFACT, RNA-binding domain;Nucleic acid-binding, OB-fold;Nucleotide-binding alpha-beta plait domain superfamily;OB-fold nucleic acid binding domain, AA-tRNA synthetase-type;RNA recognition motif domain;RNA-binding domain superfamily;Replication factor A protein 1;Replication factor A, C-terminal;Rep…
A0A0N7KKY8.1	Single-copy	126	459.154	51.0151	59.8182		Protein kinase domain-containing protein	Protein kinase-like domain superfamily;Protein kinase domain;Protein kinase, ATP binding site;		Q75L42.1(118.5);Q6ETM9.1(115.3);Q852Q2.1(112.7);Q5Z6X0.1(107.8);Q2QMI0.2(106.2);Q852Q0.1(103.2);Q852Q1.1(103.2);Q75GK4.1(99.6);	KA1 domain/Ssp2, C-terminal;Kinase associated domain 1 (KA1);NAF domain;NAF/FISL domain;Protein kinase domain;Protein kinase, ATP binding site;Protein kinase-like domain superfamily;Serine/threonine-protein kinase, active site;Ubiquitin-associated domain;
A0A0P0W6B4.1	Single-copy	136	307.762	55.7728	59.7783		Os04g0120350 protein	Peptidase S8/S53 domain superfamily;		A0A0P0W6Q2.1(74.1);Q7XT44.2(70.8);A0A0P0W6P0.1(68.0);Q6EPJ5.1(37.4);Q0E251.1(34.6);A0A0P0VHD8.1(31.8);Q8RVA0.1(30.2);	Cucumisin-like catalytic domain;Peptidase S8 propeptide/proteinase inhibitor I9;Peptidase S8 propeptide/proteinase inhibitor I9 superfamily;Peptidase S8, subtilisin, His-active site;Peptidase S8, subtilisin, Ser-active site;Peptidase S8, subtilisin-related;Peptidase S8/S53 domain;Peptidase S8/S53 domain superfamily;Subtilisin-like protease, fibronectin type-III domain;
A0A0P0X2H5.1	Single-copy	54	321.013	55.2519	59.7764		Skp1 domain-containing protein			Q6PL11.1(79.4);Q651E8.1(79.0);Q8H5C3.1(69.9);Q6H5Q3.1(68.7);Q6H4D4.1(68.6);Q7XE44.1(68.3);Q6H5Q8.1(67.1);A0A0P0XN22.1(66.4);Q8H5C9.1(66.3);Q6ZDJ1.1(66.1);	S-phase kinase-associated protein 1;S-phase kinase-associated protein 1-like;SKP1 component, POZ domain;SKP1 component, dimerisation;SKP1-like, dimerisation domain superfamily;SKP1/BTB/POZ domain superfamily;
A0A0N7KIS3.1	Single-copy	88	60.3716	111.103	59.3974		Os04g0290750 protein			Q0DHC5.1(20.1);Q6EPA2.1(18.6);Q6AT72.1(17.8);	PDZ domain;PDZ superfamily;Peptidase S1, PA clan;Peptidase S1C;Plastid division protein PDV1/PDV2;Protease Do-like, PDZ domain;WEB family;
B7ER93.1	Single-copy	133	65.6487	92.3045	59.2775		Expressed protein			Q8H903.1(27.3);Q10RW9.1(27.0);Q5TKQ5.1(19.1);	Chaperonin Cpn60;Chaperonin Cpn60, conserved site;Chaperonin Cpn60/TCP-1 family;GroEL-like apical domain superfamily;GroEL-like equatorial domain superfamily;TCP-1-like chaperonin intermediate domain superfamily;
A0A0P0XTR2.1	Single-copy	144	106.99	72.0965	59.0822		Os10g0397466 protein			Q9LDF0.1(40.1);Q9LE72.1(35.1);A0A0P0UZQ2.1(34.0);Q6L4I8.1(16.0);Q0J185.1(13.6);Q2QN17.1(12.1);	Cytochrome P450;Cytochrome P450 superfamily;Cytochrome P450, E-class, group I;Cytochrome P450, E-class, group IV;Cytochrome P450, conserved site;
A0A0P0V4D3.1	Single-copy	122	225.06	59.6664	59.0631		BHLH domain-containing protein			Q7XPS3.2(95.7);B7F427.1(90.8);A0A0P0Y0X8.1(69.6);Q336P5.1(49.6);	Helix-loop-helix DNA-binding domain superfamily;Myc-type, basic helix-loop-helix (bHLH) domain;Transcription factor MYC/MYB N-terminal;
A0A0P0Y6B3.1	Single-copy	108	372.551	53.2824	58.9338		Os12g0123600 protein	Nucleoside phosphatase GDA1/CD39;		Q2QYE1.2(89.2);A0A0P0XYD2.1(88.0);A0A0N7KSD1.1(82.1);Q53KM3.1(71.3);A0A0P0Y1M2.1(69.9);Q6Z4P2.1(52.3);Q8H7L6.1(51.8);Q6Z543.1(25.8);Q10KM6.1(18.3);	Nucleoside phosphatase GDA1/CD39;
A0A0P0WY54.1	Homologous	111	1257.67	39.8342	58.7114	A0A0P0XZG4.1(46.8);A0A0P0Y3H3.1(44.7);A0A0P0WTA9.1(37.1);	Os06g0585966 protein	Protein kinase-like domain superfamily;		A0A0P0WYQ5.1(120.0);A0A0N7KEX1.1(119.1);A0A0P0W7S1.1(117.9);Q6H845.1(117.8);A0A0P0WTB4.1(117.0);Q6YUZ6.1(115.8);Q2R2D5.1(115.4);Q2R0X3.1(114.6);Q6H8C5.1(114.3);	Leucine-rich repeat;Leucine-rich repeat domain superfamily;Leucine-rich repeat, typical subtype;Leucine-rich repeat-containing N-terminal, plant-type;Protein kinase domain;Protein kinase, ATP binding site;Protein kinase-like domain superfamily;Serine-threonine/tyrosine-protein kinase, catalytic domain;Serine/threonine-protein kinase, active site;
A0A0P0Y9F1.1	Single-copy	91	60.2475	106.21	58.6775		Os12g0404760 protein			Q6YVJ0.1(32.7);Q5MBR6.1(17.5);	Carotenoid oxygenase;
A0A0P0W103.1	Single-copy	91	58.5974	132.757	58.4873		Os03g0659500 protein			A0A0N7KQW3.1(14.7);Q10DG8.1(13.1);Q7GCH3.1(12.7);A0A0P0XI87.1(12.3);	26S proteasome regulatory subunit P45-like;AAA ATPase, AAA+ lid domain;AAA+ ATPase domain;AAA-type ATPase, N-terminal domain;ATPase, AAA-type, conserved site;ATPase, AAA-type, core;Alpha/Beta hydrolase fold;BPM, C-terminal;BTB/POZ domain;Lecithin:cholesterol/phospholipid:diacylglycerol acyltransferase;MATH/TRAF domain;P-loop containing nucleoside triphosphate hydrolase;Proteasomal ATPase OB C-ter…
A0A0P0V3I6.1	Single-copy	107	59.2859	111.634	58.3778		Os01g0505866 protein			A0A0P0Y5Z6.1(16.4);Q84NW7.1(15.6);C7IW64.2(13.8);Q0DJX6.1(12.5);Q69NN6.1(10.9);	DNA glycosylase;Demeter, RRM-fold domain;Endonuclease III-like, iron-sulphur cluster loop motif;Helix-turn-helix, base-excision DNA repair, C-terminal;HhH-GPD domain;LSM domain superfamily;Mechanosensitive ion channel MscS;Mechanosensitive ion channel MscS domain superfamily;Mechanosensitive ion channel MscS-like, plants/fungi;NTF2-like domain superfamily;Permuted single zf-CXXC unit;Protein of u…
A0A0P0WN69.1	Single-copy	108	60.9033	101.394	58.375		Os05g0447400 protein			A0A0P0XP47.1(20.8);Q0DWE8.1(13.2);Q2QMW1.1(12.7);Q2QWD6.1(12.6);	Cyclin;Cyclin, C-terminal domain;Cyclin, N-terminal;Cyclin-like;Cyclin-like superfamily;Cytochrome P450;Cytochrome P450 superfamily;Cytochrome P450, E-class, group I;Cytochrome P450, conserved site;Leucine-rich repeat domain superfamily;NB-ARC;P-loop containing nucleoside triphosphate hydrolase;Rx, N-terminal;Virus X resistance protein-like, coiled-coil domain;
Q655G7.1	Homologous	125	181.007	62.5232	58.1625	Q8LQQ2.1(122.8);Q6Z727.1(111.1);Q6F332.3(36.8);Q0JNS6.2(36.8);Q0JNL7.1(36.6);	EF-hand domain-containing protein	EF-hand domain pair;EF-Hand 1, calcium-binding site;EF-hand domain;		Q6I587.1(98.6);A2ZVI7.1(96.5);B9FKW9.1(90.6);	EF-Hand 1, calcium-binding site;EF-hand domain;EF-hand domain pair;Protein kinase domain;Protein kinase, ATP binding site;Protein kinase-like domain superfamily;Serine/threonine-protein kinase, active site;
A0A0P0Y3V4.1	Single-copy	85	63.7496	93.4082	58.1525		Os11g0544833 protein			Q6H6S3.1(16.8);Q6AWY6.2(16.3);Q84UQ3.1(14.8);Q9FYQ0.1(14.7);Q84M51.1(14.1);	E3 ligase, CCCH-type zinc finger;Glutamine-Leucine-Glutamine, QLQ;Growth-regulating factor;Helix-turn-helix motif;Homeobox domain;Homeobox, conserved site;Homeobox-like domain superfamily;Leucine zipper, homeobox-associated;Myb/SANT-like domain;PLAC8 motif-containing protein;Ubiquitin domain;Ubiquitin-like domain superfamily;WRC domain;Zinc finger, CCCH-type;Zinc finger, CCCH-type superfamily;
A0A0P0XWS4.1	Homologous	146	434.521	51.3192	58.1231	A0A0P0XBR4.1(105.5);Q0DAN9.1(38.9);	Os10g0511250 protein	Cytochrome P450;Cytochrome P450, conserved site;Cytochrome P450, E-class, group IV;Cytochrome P450 superfamily;		Q2R0R2.1(118.7);Q9FW91.1(116.9);Q6ZIG1.1(116.5);Q6ZD83.1(116.3);Q7EY63.1(116.0);Q7XP33.2(112.0);A0A0P0V315.1(111.5);A0A0P0WZJ2.1(109.4);Q0DAP2.2(108.6);	Cytochrome P450;Cytochrome P450 superfamily;Cytochrome P450, E-class, group I;Cytochrome P450, conserved site;
A0A0P0WHE8.1	Single-copy	91	107.409	71.6066	58.0091		Os05g0116500 protein			B9FM60.1(82.3);	DUF3741-associated sequence motif;Domain of unknown function DUF3741;Domain of unknown function DUF4378;
A0A0P0X5C2.1	Single-copy	87	110.656	70.9254	57.8864		Os07g0444000 protein			Q7XDG7.2(83.5);	Beta-glucosidase GBA2-type;Glycosyl-hydrolase family 116, N-terminal;Glycosyl-hydrolase family 116, catalytic region;Six-hairpin glycosidase superfamily;
A0A0P0XJY2.1	Homologous	97	186.987	61.9103	57.6126	A0A0P0XK64.1(43.6);	Os09g0320600 protein			A0A0P0XKR2.1(33.0);Q0J5U5.1(27.6);A0A0P0Y935.1(23.3);Q0J2H4.1(22.6);A0A0P0Y4J8.1(17.8);A0A0P0XKI1.1(15.5);B9G305.1(13.9);Q53N04.1(13.2);	Ankyrin repeat;Ankyrin repeat-containing domain;Ankyrin repeat-containing domain superfamily;BPM, C-terminal;BTB/POZ domain;MATH/TRAF domain;PGG domain;SKP1/BTB/POZ domain superfamily;TRAF-like;
A0A0P0XT05.1	Single-copy	132	151.466	65.0735	57.4464		Os10g0162500 protein			Q9LGF6.1(56.7);Q0DKA5.1(48.9);Q69UD7.1(30.2);Q69UE6.1(22.1);Q7XHC4.1(16.3);Q9LGQ6.1(16.2);Q7XPK7.1(15.0);A0A0P0X0M7.1(14.9);Q5JNT2.1(14.8);Q7XXN4.1(14.5);	Chloramphenicol acetyltransferase-like domain superfamily;Transferase;
A0A0P0Y4P4.1	Single-copy	112	359.734	53.3304	57.1364		Os11g0639100 protein	Leucine-rich repeat domain superfamily;		Q2R0M5.1(66.3);A0A0P0WC06.1(63.7);Q94J89.1(50.6);A0A0N7KN90.1(46.6);A0A0P0Y076.1(45.7);	B3 DNA binding domain;DNA-binding pseudobarrel domain superfamily;Leucine-rich repeat;Leucine-rich repeat domain superfamily;Leucine-rich repeat, typical subtype;NB-ARC;P-loop containing nucleoside triphosphate hydrolase;Rx, N-terminal;Virus X resistance protein-like, coiled-coil domain;
A0A0P0XIU6.1	Single-copy	62	216.376	59.7371	57.0808		Os08g0560800 protein			Q7Y140.1(99.2);Q9SLY8.2(82.3);Q7XV86.1(22.8);	Calreticulin;Calreticulin/calnexin;Calreticulin/calnexin, P domain superfamily;Calreticulin/calnexin, conserved site;Concanavalin A-like lectin/glucanase domain superfamily;
A0A0P0XW15.1	Single-copy	128	135.131	66.8633	57.0549		Os10g0506950 protein			Q336P5.1(108.6);B7F427.1(16.0);Q0JP90.1(14.7);Q7XD82.1(13.5);Q6H6Q9.1(11.1);	BRCT domain superfamily;DNA repair Nbs1, C-terminal;Forkhead-associated (FHA) domain;Helix-loop-helix DNA-binding domain superfamily;Myc-type, basic helix-loop-helix (bHLH) domain;Nibrin-related;SMAD/FHA domain superfamily;Transcription factor MYC/MYB N-terminal;Uncharacterized protein At4g22758-like;
A0A0P0VZ77.1	Single-copy	96	259.772	57.3115	57.008		Os03g0393375 protein	Alpha/Beta hydrolase fold;Peptidase S10, serine carboxypeptidase;		Q10K80.1(108.8);Q6YYX5.1(95.4);Q75HY2.1(20.0);Q5SMV5.1(19.0);Q75I01.1(17.4);Q5W6C5.1(17.0);Q9FP87.1(16.6);Q5W727.1(14.0);	Alpha/Beta hydrolase fold;Peptidase S10, serine carboxypeptidase;Serine carboxypeptidase, serine active site;Serine carboxypeptidases, histidine active site;
A0A0P0XDQ1.1	Single-copy	116	65.8594	88.3138	56.7659		Os08g0235183 protein			Q2QNE1.1(98.8);Q2QND6.1(63.5);Q2QND8.1(56.6);Q2QZ50.1(37.6);Q53NM4.1(27.1);Q69JY6.1(23.7);Q69JY8.1(19.1);Q10P77.1(18.9);Q654Y4.1(15.5);	Osmotin/thaumatin-like superfamily;Thaumatin family;Thaumatin, conserved site;
A0A0P0WMG8.1	Single-copy	46	162.056	63.787	56.6363		Os05g0422900 protein			B9FFT7.1(43.2);A0A0P0VQJ4.1(21.5);Q5WN04.1(20.7);Q7XHW1.1(17.3);	ATP-dependent DNA helicase RecQ, zinc-binding domain;DEAD/DEAH box helicase domain;DNA helicase, ATP-dependent, RecQ type;HRDC domain;HRDC-like superfamily;Helicase Helix-turn-helix domain;Helicase superfamily 1/2, ATP-binding domain;Helicase, C-terminal;P-loop containing nucleoside triphosphate hydrolase;RQC domain;Ubiquitin-associated domain;Winged helix DNA-binding domain superfamily;Winged he…
A0A0P0XDE4.1	Homologous	71	462.003	50.3056	56.572	A0A0P0XD89.1(38.0);	Os08g0227500 protein	TRAF-like;		Q7F0Z3.1(74.6);A0A0P0XE17.1(67.5);A0A0P0XDJ3.1(64.0);Q8LI88.1(61.6);A0A0P0WEY4.1(60.8);Q8H3E5.1(59.2);Q10C73.1(58.1);Q8H4G2.1(47.7);Q69L94.1(46.1);	BPM, C-terminal;BTB/POZ domain;MATH/TRAF domain;SKP1/BTB/POZ domain superfamily;TRAF-like;
A0A0P0V1C1.1	Single-copy	79	59.7359	98.8139	56.565		Os01g0287100 protein			Q5VNJ2.1(14.6);B7EZ59.1(13.1);Q7XDH8.2(12.6);Q0JIF2.2(11.2);Q0E4F6.1(10.7);	At1g75730-like;Cyclin;Cyclin, C-terminal domain;Cyclin, N-terminal;Cyclin-dependent kinase inhibitor;Cyclin-like;Cyclin-like superfamily;Integrator complex subunit 7;Protein DMP;
C7IZ14.1	Single-copy	131	85.7348	76.6076	56.5363		Os02g0702700 protein			Q6L8F9.1(71.9);A3BI11.1(17.9);Q6L8G0.1(16.3);Q0DHE3.3(15.1);Q6L8F7.1(13.4);Q5Z653.2(13.0);Q6L8G1.1(11.9);	Zinc/iron permease;Zinc/iron permease, fungal/plant;
A0A0P0Y7G5.1	Homologous	99	76.9197	80.1646	56.4809	A0A0P0Y8C8.1(199.5);	Os12g0169200 protein			Q53NS7.1(32.1);A0A0P0X7F2.1(29.9);A5HBA7.1(23.0);	Harbinger transposase-derived protein;
Q5QLQ9.1	Homologous	133	104.85	71.4941	56.3341	Q69MM2.1(71.8);Q6ESQ0.1(71.1);Q7XQK2.2(40.8);	HMG box domain-containing protein	High mobility group box domain;High mobility group box domain superfamily;		Q9LGR0.1(44.8);Q65WY8.1(39.6);Q6K7A1.1(32.9);A0A0P0XPV0.1(28.6);	ARID DNA-binding domain;ARID DNA-binding domain superfamily;Domain of unknown function DUF1747;FACT complex subunit POB3-like, N-terminal PH domain;High mobility group box domain;High mobility group box domain superfamily;PH-like domain superfamily;SSRP1 domain;SSRP1 domain superfamily;Structure-specific recognition protein;
A0A0N7KLF4.1	Single-copy	100	200.808	60.563	56.257		HTH myb-type domain-containing protein			Q0JIC2.1(60.1);Q655P0.1(56.2);Q7X8X3.1(53.2);Q84PW8.1(52.8);Q53NK6.1(52.3);A3AWY9.1(52.2);Q2R2L6.1(51.9);	Homeobox-like domain superfamily;Myb domain;Myb-like transcription factor;Phosphoglycerate/bisphosphoglycerate mutase, active site;SANT/Myb domain;Transcription factor GAMYB-like;
A0A0P0WLT7.1	Single-copy	93	136.531	66.4441	56.2547		Os05g0383750 protein			Q8S1N5.1(65.3);Q6AV12.1(57.8);A0A0P0VAW6.1(28.0);	Aspartic peptidase A1 family;Aspartic peptidase domain superfamily;Pepsin-like domain, plant;Peptidase family A1 domain;Xylanase inhibitor, C-terminal;Xylanase inhibitor, N-terminal;
A0A0P0V855.1	Single-copy	97	176.539	62.3392	56.0208		Os01g0747300 protein			Q65X09.1(99.0);A0A0P0Y1W3.1(30.7);Q8LQF7.1(27.7);Q7XEK8.1(27.6);Q8H7Y9.1(24.7);Q5JL24.1(23.0);A0A0P0VNW3.1(22.4);Q10C31.1(21.8);A0A0P0VB70.1(20.8);B7EKS3.1(20.0);	Protein of unknown function PDDEXK-like;
A0A0P0Y2Z2.1	Single-copy	44	611.006	47.0636	55.9995		FAD_binding_8 domain-containing protein			Q0DHH6.1(55.0);Q8S1T0.1(54.6);Q65XC8.1(54.0);Q69LJ7.1(50.0);A0A0P0XGC6.1(49.4);Q5ZAJ0.1(49.3);Q2QP56.1(40.6);Q0JCX7.1(20.5);	Cytochrome b245, heavy chain;EF-Hand 1, calcium-binding site;EF-hand domain;EF-hand domain pair;FAD-binding 8;FAD-binding domain, ferredoxin reductase-type;Ferredoxin-NADP reductase (FNR), nucleotide-binding domain;Ferric reductase transmembrane component-like domain;Ferric reductase, NAD binding domain;NADPH oxidase Respiratory burst;Respiratory burst oxidase homologue protein B;Riboflavin synth…
A0A0P0W6H5.1	Single-copy	115	629.67	46.6949	55.8059		MULE domain-containing protein			A0A0P0V514.1(120.0);Q10QV7.1(114.8);Q8H344.1(107.5);C7J599.1(107.2);Q0E2Z0.1(93.7);A0A0P0VHJ2.1(87.0);	FAR1 DNA binding domain;FHY3/FAR1 family;MULE transposase domain;Papain-like cysteine peptidase superfamily;Ulp1 protease family, C-terminal catalytic domain;Zinc finger, GATA-type;Zinc finger, NHR/GATA-type;Zinc finger, PMZ-type;Zinc finger, SWIM-type;
A0A0N7KH49.1	Single-copy	75	80.3887	78.052	55.5555		Os03g0307500 protein			A0A0P0XI87.1(15.1);Q84Q81.1(14.1);Q60DV9.1(14.0);Q84SZ7.1(12.7);Q10QK1.1(12.6);	AAA+ ATPase domain;AAA-type ATPase, N-terminal domain;ATPase, AAA-type, conserved site;ATPase, AAA-type, core;Armadillo-like helical;Armadillo-type fold;BPM, C-terminal;BTB/POZ domain;Domain of unknown function DUF1117;E3 ubiquitin-protein ligase RNF126-like, zinc-ribbon;GDSL lipase/esterase;GDSL lipase/esterase-like, plant;MATH/TRAF domain;P-loop containing nucleoside triphosphate hydrolase;Pumi…
Q0D6K7.1	Single-copy	96	74.6442	80.6521	55.5117		Os07g0470400 protein			Q0J0M8.1(19.0);Q5N6V3.1(17.5);Q9XHL5.2(16.0);Q84QP9.1(13.6);	BPM, C-terminal;BTB/POZ domain;Cullin repeat-like-containing domain superfamily;Exocyst complex component Exo70;Hydroxymethylglutaryl-CoA reductase, N-terminal;Hydroxymethylglutaryl-CoA reductase, class I/II;Hydroxymethylglutaryl-CoA reductase, class I/II, NAD/NADP-binding domain superfamily;Hydroxymethylglutaryl-CoA reductase, class I/II, catalytic domain superfamily;Hydroxymethylglutaryl-CoA re…
A0A0P0VRK4.1	Homologous	146	348.938	53.3486	55.5068	A0A0P0XCU2.1(72.3);	Dimer_Tnp_hAT domain-containing protein			Q0J9W3.1(110.7);A0A0P0V2M6.1(107.7);A0A0P0XUP5.1(103.2);A0A0P0VJT3.1(103.2);Q6AVI0.1(100.2);	HAT, C-terminal dimerisation domain;Ribonuclease H-like superfamily;Zinc finger C2H2 superfamily;Zinc finger, BED-type;hAT-like transposase, RNase-H fold;
Q0J478.1	Single-copy	126	181.405	61.7731	55.3635		Os08g0530100 protein			Q8RUF2.1(117.5);Q0DYK5.1(116.1);A0A0P0WE02.1(115.6);A0A0N7KEB3.1(112.6);Q6AVG5.1(66.7);	Nucleotide-diphospho-sugar transferase;Nucleotide-diphospho-sugar transferases;
A0A0P0X4D4.1	Homologous	133	192.3	60.8699	55.0719	A0A0P0VHY3.1(37.1);B9GDI5.1(30.1);	Os07g0277066 protein	F-box-like domain superfamily;		Q2QQE3.1(71.9);Q8GVM0.1(67.1);Q8GVM3.1(66.2);Q7XSL8.2(62.9);Q0JES4.1(53.2);	F-box domain;F-box-like domain superfamily;FBD domain;Leucine-rich repeat 2;Leucine-rich repeat domain superfamily;
Q69U86.1	Single-copy	137	55.7649	112.407	54.9735		Os06g0616900 protein			Q6EPA2.1(25.9);Q6Z2Z1.1(18.3);Q6Z2Y4.1(18.3);Q2QN91.1(15.4);Q6H7B2.1(13.4);Q7EZC8.1(13.3);	Concanavalin A-like lectin/glucanase domain superfamily;Legume lectin domain;Legume lectin, beta chain, Mn/Ca-binding site;Plastid division protein PDV1/PDV2;Protein kinase domain;Protein kinase, ATP binding site;Protein kinase-like domain superfamily;Protein of unknown function DUF1677, Oryza sativa;Serine/threonine-protein kinase, active site;Tetraspanin/Peripherin;WD40 repeat;WD40 repeat, cons…
C7J989.1	Homologous	99	822.233	43.5808	54.6693	A0A0P0UYI3.1(38.4);A0A0P0X7T6.1(38.3);A0A0P0X7E8.1(36.5);A0A0P0XLA2.1(32.2);A0A0P0WTA9.1(31.6);A0A0P0Y544.1(31.3);	Protein kinase domain-containing protein			Q6Z5A3.1(119.0);Q7XHW7.1(116.1);B9GB71.1(115.4);A0A0P0X7K2.1(114.0);Q2R2M9.1(113.9);A0A0N7KQM4.1(113.8);Q10LW3.1(113.5);A0A0P0XKJ4.1(112.7);Q7F1I0.1(112.6);	Gnk2-homologous domain;Gnk2-homologous domain superfamily;Leucine-rich repeat;Leucine-rich repeat domain superfamily;Leucine-rich repeat-containing N-terminal, plant-type;Malectin-like domain;Protein kinase domain;Protein kinase, ATP binding site;Protein kinase-like domain superfamily;Serine-threonine/tyrosine-protein kinase, catalytic domain;Serine/threonine-protein kinase, active site;Tyrosine-…
A0A0P0X7Q5.1	Single-copy	74	66.8548	84.9203	54.5791		Os07g0565200 protein			Q0E3C3.2(21.6);Q6AVT7.1(15.4);Q69IX0.1(13.7);Q2QN11.1(13.0);A3AD50.1(13.0);	Aspartic peptidase A1 family;Aspartic peptidase domain superfamily;CAAX prenyl protease 2;ELK domain;Homeobox KN domain;Homeobox domain;Homeobox-like domain superfamily;KNOX1;KNOX2;Pepsin-like domain, plant;Peptidase family A1 domain;Retrieval of early ER protein Rer1;Ribosomal protein L7/L12;Ribosomal protein L7/L12, C-terminal;Ribosomal protein L7/L12, C-terminal/adaptor protein ClpS-like;Ribos…
A0A0P0WWL7.1	Single-copy	145	59.8576	93.3455	54.5721		Os06g0346000 protein			C7J0V5.1(15.5);Q5ZB59.1(15.3);Q653G1.1(15.2);Q5Z480.1(14.7);Q6AUV3.1(13.7);Q5VRL4.1(13.6);	F-box domain;F-box-like domain superfamily;FBD domain;Leucine-rich repeat domain superfamily;NEMP family;Protein SCAI;Protein SCAI, metazoan/viridiplantae;Putative S-adenosyl-L-methionine-dependent methyltransferase;Ribonuclease CAF1;Ribonuclease H superfamily;Ribonuclease H-like superfamily;S-adenosyl-L-methionine-dependent methyltransferase;SNARE;Syntaxin, N-terminal domain;Syntaxin/epimorphin,…
A0A0P0XYN9.1	Single-copy	82	55.4099	110.46	54.4573		Os11g0127951 protein			Q10PS7.1(17.9);B7F8F5.1(13.1);Q5VRL4.1(13.0);	Armadillo-like helical;Armadillo-type fold;Cytochrome P450;Cytochrome P450 superfamily;Cytochrome P450, E-class, group I;Cytochrome P450, conserved site;Nucleic acid binding NABP;Pumilio RNA-binding repeat;Pumilio homology domain;Pumilio, RNA binding domain;SNARE;Syntaxin, N-terminal domain;Syntaxin/epimorphin, conserved site;Target SNARE coiled-coil homology domain;
B9FP10.1	Single-copy	89	60.169	92.5011	54.4325		Os05g0346000 protein			Q84YJ6.1(48.6);Q7XUV4.2(13.4);	Bromodomain;Bromodomain-like superfamily;Homeobox-like domain superfamily;Myb-like domain;PSRP-3/Ycf65 superfamily;Ribosomal protein PSRP-3/Ycf65;SANT/Myb domain;
A0A0P0V5K4.1	Single-copy	94	72.7963	80.35	53.7153		Os01g0632550 protein			Q0J3J6.1(62.0);Q6K8A9.1(16.4);Q0J7T6.2(15.6);	GLABROUS1 enhancer-binding protein family;RNA polymerase sigma factor, region 2;RNA polymerase sigma factor, region 3/4-like;RNA polymerase sigma-70;RNA polymerase sigma-70 like domain;RNA polymerase sigma-70 region 2;RNA polymerase sigma-70 region 3;RNA polymerase sigma-70 region 4;Winged helix-like DNA-binding domain superfamily;
A0A0P0Y3H3.1	Homologous	134	1161.31	39.7351	53.7028	A0A0P0XZG4.1(65.7);A0A0P0WTA9.1(52.7);A0A0P0WY54.1(43.9);A0A0N7KSI1.1(34.7);	Os11g0568750 protein	Protein kinase-like domain superfamily;		Q69KC4.1(120.0);Q2R0X3.1(119.5);A0A0N7KEX1.1(118.1);A0A0P0WYI2.1(117.8);A3BD37.1(117.0);Q2R2D5.1(116.5);B9FTY2.1(116.4);Q9LGI5.1(114.7);Q5VPA8.1(114.4);	Leucine rich repeat 4;Leucine-rich repeat;Leucine-rich repeat domain superfamily;Leucine-rich repeat, typical subtype;Leucine-rich repeat-containing N-terminal, plant-type;Protein kinase domain;Protein kinase, ATP binding site;Protein kinase-like domain superfamily;Serine-threonine/tyrosine-protein kinase, catalytic domain;Serine/threonine-protein kinase, active site;
Q0D4Q6.2	Single-copy	138	153.677	63.7304	53.5106		Os07g0613000 protein			Q67UU0.1(102.0);Q7XAP4.1(93.3);	HD/PDEase domain;RelA/SpoT;
A0A0P0WFX6.1	Single-copy	113	62.9444	87.246	53.4222		Os04g0662000 protein			Q7XXN2.1(21.6);Q84ZM2.2(15.9);Q69IM9.1(15.2);A0A0P0VMM0.1(15.1);	ACT domain;Class I-like SAM-dependent O-methyltransferase;EF-Hand 1, calcium-binding site;EF-hand domain;EF-hand domain pair;Homeobox-like domain superfamily;Myb-like domain;Protein kinase domain;Protein kinase, ATP binding site;Protein kinase-like domain superfamily;S-adenosyl-L-methionine-dependent methyltransferase;SANT/Myb domain;Serine-threonine/tyrosine-protein kinase, catalytic domain;Seri…
A0A0P0VH99.1	Single-copy	49	59.9596	90.7918	53.2959		Os02g0255900 protein			Q10LH4.1(12.8);Q10LH5.1(12.8);Q10LF8.1(12.4);	Helix hairpin bin domain superfamily;NOP5, N-terminal;NOSIC;Nop domain;Nop domain superfamily;Nop, C-terminal domain;
A3AQ98.1	Single-copy	114	251.752	56.8352	53.2214		Os04g0115100 protein			Q5WMM8.1(32.0);Q8LQR8.1(27.8);Q8LQR6.1(27.7);A0A0P0V926.1(27.2);A0A0N7KT26.1(25.8);Q8LQR9.1(19.5);A0A0N7KTM5.1(18.8);A0A0P0XTQ5.1(17.2);	Leucine-rich repeat domain superfamily;NB-ARC;P-loop containing nucleoside triphosphate hydrolase;Rx, N-terminal;Virus X resistance protein-like, coiled-coil domain;
A0A0P0XDY8.1	Single-copy	112	543.71	47.7751	53.147		Transmembrane 9 superfamily member	Nonaspanin (TM9SF);		Q0J3T4.1(115.9);B7FAI5.1(115.9);Q67UQ9.1(103.9);Q69R01.1(72.4);Q60DU0.1(55.3);Q6Z656.1(48.4);Q9XGQ5.1(46.2);Q6Z2C9.1(40.6);	MFS transporter superfamily;Nonaspanin (TM9SF);
A0A0P0XTS1.1	Single-copy	103	73.3145	79.6699	53.1178		Os10g0395601 protein			Q84VG3.1(15.7);Q2QZH3.1(15.6);A0A0P0Y813.1(14.0);A0A0P0WTL7.1(11.7);	HAT, C-terminal dimerisation domain;Leucine-rich repeat;Leucine-rich repeat domain superfamily;Leucine-rich repeat, typical subtype;Leucine-rich repeat-containing N-terminal, plant-type;Protein kinase domain;Protein kinase, ATP binding site;Protein kinase-like domain superfamily;Ribonuclease H-like superfamily;Serine-threonine/tyrosine-protein kinase, catalytic domain;Serine/threonine-protein kin…
Q8H571.1	Single-copy	71	73.4574	79.5507	53.0461		Os07g0175200 protein	Cysteine alpha-hairpin motif superfamily;		Q7XXN2.1(15.2);Q5VPE9.1(14.5);Q10LT2.1(13.8);Q69Q33.1(11.1);	AAA+ ATPase domain;ABC transporter-like;ABC-2 type transporter;ACT domain;Leucine carboxyl methyltransferase 1;Methyltransferase Ppm1/Ppm2/Tcmp;P-loop containing nucleoside triphosphate hydrolase;Pentacotripeptide-repeat region of PRORP;Pentatricopeptide repeat;Protein kinase domain;Protein kinase-like domain superfamily;S-adenosyl-L-methionine-dependent methyltransferase;Serine-threonine/tyrosin…
A0A0P0YA24.1	Homologous	136	417.192	50.7007	52.8827	A0A0P0VVT7.1(152.8);A0A0P0WJI7.1(30.5);	Os12g0467450 protein			A0A0P0X6L2.1(77.9);A0A0P0XUP5.1(77.3);A0A0P0VJT3.1(77.2);Q0JK40.1(74.0);Q0JMB2.3(71.2);A0A0P0XUB7.1(61.7);Q0J9W3.1(55.4);	HAT, C-terminal dimerisation domain;Ribonuclease H-like superfamily;Zinc finger C2H2 superfamily;Zinc finger, BED-type;hAT-like transposase, RNase-H fold;
A0A0P0WUN9.1	Single-copy	122	64.0605	85.3623	52.7164		Os06g0226066 protein			B8YEK4.1(62.9);A0A0P0V830.1(10.4);	DYW domain;Glutamate carboxypeptidase 2-like;PA domain;Pentatricopeptide repeat;Peptidase M28;Tetratricopeptide-like helical domain superfamily;Transferrin receptor-like, dimerisation domain;Transferrin receptor-like, dimerisation domain superfamily;
A0A0P0V996.1	Homologous	113	126.534	66.5824	52.5598	A0A0N7KJG6.1(106.9);	Os01g0794700 protein	Chloramphenicol acetyltransferase-like domain superfamily;		A0A0P0WFM9.1(25.4);Q0J9P7.1(22.8);A0A0P0WFA1.1(22.6);A0A0P0XCH6.1(20.2);A0A0P0WSB6.1(20.2);Q5VP55.1(18.4);Q5VP60.1(18.2);A0A0N7KIZ3.1(15.9);A0A0N7KCS7.1(15.5);	BRD4-interacting chromatin-remodeling complex-associated protein;Chloramphenicol acetyltransferase-like domain superfamily;Transferase;
A0A0P0Y785.1	Homologous	147	274.453	55.566	52.4258	A0A0P0UYC4.1(32.4);	Os12g0157550 protein	Leucine-rich repeat domain superfamily;		Q53P27.1(119.8);Q69UH7.1(119.4);Q6ZKW7.1(118.7);Q8S0M3.1(117.6);	Leucine-rich repeat;Leucine-rich repeat domain superfamily;Leucine-rich repeat, typical subtype;Leucine-rich repeat-containing N-terminal, plant-type;Malectin domain;Protein kinase domain;Protein kinase-like domain superfamily;Serine-threonine/tyrosine-protein kinase, catalytic domain;Serine/threonine-protein kinase, active site;
A0A0P0XH19.1	Single-copy	84	57.8481	92.025	52.0907		Os08g0475600 protein			A0A0P0Y868.1(14.3);Q9LDT8.1(13.9);Q7XTN8.2(12.7);	A/G-specific adenine glycosylase MutY;AAA+ ATPase domain;ATPase, AAA-type, conserved site;ATPase, AAA-type, core;Bulb-type lectin domain;Bulb-type lectin domain superfamily;DNA glycosylase;Endonuclease III, iron-sulphur binding site;Helix-turn-helix, base-excision DNA repair, C-terminal;HhH-GPD domain;MutY, C-terminal;NUDIX hydrolase-like domain superfamily;P-loop containing nucleoside triphospha…
A0A0P0XPX7.1	Single-copy	136	52.1975	127.862	52.0377		Os09g0491652 protein			Q6Z414.1(15.1);Q6YV37.1(13.7);Q653H7.1(13.5);A0A0P0XP47.1(12.9);Q6Z0Z6.1(10.4);	AAA+ ATPase domain;ATPase family AAA domain-containing protein 3;ATPase family AAA domain-containing protein 3, domain of unknown function DUF3523;ATPase, AAA-type, conserved site;ATPase, AAA-type, core;Auxin response factor;B3 DNA binding domain;DNA-binding pseudobarrel domain superfamily;Homeobox-like domain superfamily;Myb domain;Myb-like transcription factor;NB-ARC;P-loop containing nucleosid…
A0A0P0XLA2.1	Homologous	138	656.874	45.442	51.9033	A0A0P0XLW7.1(105.1);A0A0P0XLE8.1(101.2);A0A0P0X7E8.1(42.4);A0A0P0XRU9.1(42.4);A0A0P0W6L0.1(39.3);A0A0P0WTA9.1(33.9);C7J989.1(33.2);A0A0P0Y544.1(33.2);	Protein kinase domain-containing protein	Protein kinase-like domain superfamily;Protein kinase domain;Serine-threonine/tyrosine-protein kinase, catalytic domain;		A0A0P0XZM1.1(119.2);Q6Z5A3.1(116.1);Q8LHT1.1(116.1);Q65X96.1(113.2);B7F8F0.1(113.0);A0A0P0X7K2.1(112.0);A0A0P0W774.1(111.2);A0A0N7KCU3.1(111.0);	Concanavalin A-like lectin/glucanase domain superfamily;Gnk2-homologous domain;Gnk2-homologous domain superfamily;Legume lectin domain;Legume lectin, alpha chain, conserved site;Legume lectin, beta chain, Mn/Ca-binding site;Leucine-rich repeat;Leucine-rich repeat domain superfamily;Leucine-rich repeat, typical subtype;Leucine-rich repeat-containing N-terminal, plant-type;Malectin-like domain;Prot…
Q0IYP0.1	Homologous	48	79.2673	76.3396	51.7922	A0A0P0XDR7.1(67.0);	Os10g0185100 protein			A0A0N7KDS3.1(16.0);A0A0P0VKY4.1(16.0);A0A0P0Y2I4.1(15.3);Q0J7V5.1(14.5);	Interactor of constitutive active ROPs;Probable transposase, Ptta/En/Spm, plant;THO complex subunit 7/Mft1;
A0A0P0XC14.1	Single-copy	98	56.7938	93.3439	51.778		Os08g0168150 protein			Q6Z796.1(40.5);Q7GDL5.1(15.7);	ELK domain;F-box domain;F-box-like domain superfamily;Homeobox KN domain;Homeobox domain;Homeobox, conserved site;Homeobox-like domain superfamily;KNOX1;KNOX2;Leucine-rich repeat;Leucine-rich repeat domain superfamily;Leucine-rich repeat, cysteine-containing subtype;
A0A0P0XXC4.1	Homologous	118	480.437	48.861	51.7687	A0A0P0VBB7.1(205.9);	DOG1 domain-containing protein	Transcription factor TGA like domain;		Q53Q70.1(117.0);Q2QXL0.1(108.9);Q5N7C7.1(107.1);Q6F2N0.1(102.5);A0A0P0WFC8.1(94.0);A0A0P0WNV7.1(88.7);Q6H434.1(87.0);Q6ZBS8.1(85.7);Q69T21.1(71.1);Q0E342.2(28.4);	Basic-leucine zipper domain;Transcription factor TGA like domain;
Q5W681.1	Single-copy	110	52.6432	109.096	51.6086		Os05g0328000 protein			Q5VRL4.1(17.4);A0A0P0WZC4.1(16.1);A0A0P0V678.1(14.2);A0A0P0VDF3.1(13.6);Q69MD4.1(13.2);	Potassium transporter;Protein MIZU-KUSSEI 1-like, plant;Rubisco LSMT, substrate-binding domain;SET domain;SNARE;Syntaxin, N-terminal domain;Syntaxin/epimorphin, conserved site;Target SNARE coiled-coil homology domain;Vacuolar protein sorting-associated protein 16;Vps16, C-terminal;Vps16, C-terminal domain superfamily;Vps16, N-terminal;
A0A0P0V7F5.1	Single-copy	90	107.936	69.1122	51.5738		Os01g0717301 protein			Q8H4S9.1(72.8);Q33B71.1(23.4);A0A0P0VG76.1(23.4);A0A0P0WLL3.1(17.0);Q94D81.1(13.9);	Alpha/Beta hydrolase fold;Alpha/beta hydrolase fold-1;Serine aminopeptidase, S33;
Q943N1.1	Homologous	102	73.8624	78.3078	51.4467	Q6L4Z7.1(116.0);Q10N71.1(95.3);	Os01g0837600 protein	Conserved hypothetical protein CHP01589, plant;		Q0E447.1(57.4);Q5Z8V1.1(47.9);Q6H680.1(22.5);Q6Z0V7.1(14.0);	BPM, C-terminal;BTB/POZ domain;Conserved hypothetical protein CHP01589, plant;MATH/TRAF domain;SKP1/BTB/POZ domain superfamily;TRAF-like;
Q69IP8.1	Homologous	148	145.272	63.9865	51.4315	A0A0P0XYZ3.1(89.2);Q7F901.1(40.7);	Os07g0532750 protein			A0A0P0XFL3.1(112.0);Q5VRH9.1(27.0);Q0IMG9.2(21.8);A0A0P0X147.1(15.8);Q5ZBD1.1(14.1);	Armadillo;Armadillo-like helical;Armadillo-type fold;Atypical Arm repeat;Importin subunit alpha;Importin-alpha, importin-beta-binding domain;U box domain;Zinc finger, RING/FYVE/PHD-type;
Q5Z4Y6.1	Homologous	109	60.962	86.2992	50.9739	Q5Z4Z2.1(190.5);Q7XKX2.2(188.4);	Os06g0310400 protein			Q2R0B4.1(15.5);A0A0P0X4X2.1(12.4);C7IYE5.1(12.0);Q6ATB4.1(11.6);	EF-Hand 1, calcium-binding site;EF-hand domain;EF-hand domain pair;HAT, C-terminal dimerisation domain;HD/PDEase domain;Leucine-rich repeat domain superfamily;RelA/SpoT;Ribonuclease H-like superfamily;Ribosomal protein Rsm22-like;Rx, N-terminal;S-adenosyl-L-methionine-dependent methyltransferase;Virus X resistance protein-like, coiled-coil domain;Zinc finger C2H2 superfamily;Zinc finger, BED-type;
A0A0P0VQX9.1	Single-copy	88	63.1488	84.3125	50.9672		Os02g0806300 protein			Q653H7.1(16.6);Q8H5X9.1(14.4);Q6K718.1(13.3);Q8LNG5.1(13.2);	Auxin response factor;B3 DNA binding domain;DNA-binding pseudobarrel domain superfamily;Histone-fold;PB1 domain;Protein kinase domain;Protein kinase-like domain superfamily;Ribosomal protein S18;Ribosomal protein S18 superfamily;Serine-threonine/tyrosine-protein kinase, catalytic domain;Transcription initiation factor TAFII31;
A0A0P0XPU7.1	Single-copy	83	51.3173	118.043	50.9002		Os09g0539901 protein			Q10DR8.1(17.0);Q65X45.1(14.5);Q6ZAC2.1(14.5);	Adenylate cyclase-associated CAP;Adenylate cyclase-associated CAP, C-terminal;Adenylate cyclase-associated CAP, C-terminal superfamily;Adenylate cyclase-associated CAP, N-terminal;Adenylate cyclase-associated CAP, N-terminal domain superfamily;C-CAP/cofactor C-like domain;CAP, conserved site, N-terminal;CARP motif;Cyclase-associated protein CAP/septum formation inhibitor MinC, C-terminal;Protein …
Q0DRP1.1	Single-copy	45	408.495	50.5022	50.8893		Os03g0367200 protein			Q7EZR4.1(36.9);A3BWN0.1(36.4);Q69P77.1(35.4);Q7G602.1(34.7);Q69P73.1(34.3);B9G3V1.1(33.8);Q67TM1.1(33.6);Q6YSZ6.1(33.4);Q109F2.1(32.5);	Cytochrome P450;Cytochrome P450 superfamily;Cytochrome P450, E-class, group I;Cytochrome P450, conserved site;
Q0DAN9.1	Homologous	105	659.699	45.1324	50.6592	A0A0P0XJ71.1(67.9);A0A0P0XBR4.1(55.1);A0A0P0XWS4.1(39.0);A0A0P0X5N5.1(32.5);	Os06g0641800 protein			A0A0P0XVK5.1(119.3);Q7XE28.1(119.3);Q6ZJM5.1(119.0);A0A0P0WZJ2.1(118.6);Q10A27.1(118.6);Q69NF3.1(117.1);A0A0P0VFR0.1(116.9);A0A0P0VJA4.1(116.1);Q9FW80.1(116.0);	Cytochrome P450;Cytochrome P450 superfamily;Cytochrome P450, E-class, group I;Cytochrome P450, conserved site;
A0A0P0Y3D4.1	Homologous	126	961.203	41.1095	50.6531	A0A0P0X7E8.1(49.1);	Os11g0549000 protein			Q0JIQ1.1(116.8);Q7Y1P1.1(113.8);A0A0P0XRC1.1(113.5);A0A0P0XRC3.1(112.8);B9FXQ0.1(108.6);Q7F1L5.1(107.6);Q6ZFY2.1(106.9);A0A0P0XQ32.1(106.5);Q5ZAV5.1(106.1);A0A0P0WF87.1(105.7);	Bulb-type lectin domain;Bulb-type lectin domain superfamily;EGF-like domain;Gnk2-homologous domain;Gnk2-homologous domain superfamily;PAN/Apple domain;Protein kinase domain;Protein kinase, ATP binding site;Protein kinase-like domain superfamily;S-locus glycoprotein domain;S-locus receptor kinase, C-terminal;S-receptor-like serine/threonine-protein kinase;Serine-threonine/tyrosine-protein kinase, …
A0A0P0V451.1	Single-copy	118	53.6541	97.772	50.5116		Os01g0560100 protein			Q5ZB59.1(15.2);Q0JES4.1(13.0);Q8LQV5.1(12.4);A0A0P0VFJ1.1(10.6);	F-box domain;F-box-like domain superfamily;FBD domain;Leucine-rich repeat domain superfamily;
A0A0P0V1N4.1	Single-copy	124	72.1858	78.3735	50.3789		RRM domain-containing protein			A0A0P0WGS4.1(42.1);A0A0N7KSQ1.1(29.0);	Nucleotide-binding alpha-beta plait domain superfamily;RNA recognition motif domain;RNA recognition motif domain, eukaryote;RNA-binding domain superfamily;
A3CI25.1	Homologous	147	140.127	64.2061	50.3159	B9GDI5.1(191.4);A0A0P0VHY3.1(55.0);	Os12g0535601 protein			Q2QQE3.1(70.8);Q8GVM0.1(51.9);Q8GVM3.1(51.7);Q7XSL8.2(48.4);A0A0P0X4C5.1(44.5);	F-box domain;F-box-like domain superfamily;FBD domain;Leucine-rich repeat 2;Leucine-rich repeat domain superfamily;
A0A0P0Y7T0.1	Single-copy	74	50.2952	146.153	50.2704		Os12g0172150 protein			Q10HH4.1(23.5);Q5QLS8.1(13.4);	Frigida-like;L-lactate/malate dehydrogenase;Lactate dehydrogenase/glycoside hydrolase, family 4, C-terminal;Lactate/malate dehydrogenase, C-terminal;Lactate/malate dehydrogenase, N-terminal;Malate dehydrogenase, active site;Malate dehydrogenase, type 1;NAD(P)-binding domain superfamily;
Q2HWG0.1	Homologous	121	565.583	46.6537	49.9384	Q2HWG1.1(226.9);Q8GVV6.1(225.4);Q6K9T0.1(117.9);Q2HWH1.1(117.1);Q6H468.1(116.7);	Two-component response regulator ORR13	CheY-like superfamily;Signal transduction response regulator, receiver domain;		Q0D3B6.1(76.3);Q5SML5.1(73.4);Q689G6.1(72.2);Q10N34.1(71.9);Q6K8X6.1(70.5);Q8H7S7.1(69.3);Q5N6V8.2(67.9);Q6H805.1(65.9);Q67W50.1(61.1);	CCT domain;CheY-like superfamily;Homeobox-like domain superfamily;Myb domain;Myb domain, plants;Response regulator B-type, plant;SANT/Myb domain;Signal transduction response regulator, receiver domain;
C7J0W0.1	Single-copy	117	66.5586	80.994	49.9288		Os04g0610100 protein			A0A0P0WEM3.1(27.1);A0A0P0WEM6.1(22.5);	Probable transposase, Ptta/En/Spm, plant;
A0A0N7KPL0.1	Single-copy	108	53.6002	95.4899	49.7145		Os08g0282700 protein			A0A0P0WUP8.1(14.9);Q5Z846.1(13.8);Q8L4T2.1(12.9);Q0D6Q9.1(12.3);Q5VPG7.1(10.8);Q5NAB4.1(10.1);	3'-5' exonuclease domain;Alpha-ketoglutarate-dependent dioxygenase AlkB-like;Alpha-ketoglutarate-dependent dioxygenase AlkB-like superfamily;Exonuclease Mut-7, DEDDy 3'-5' exonuclease domain;LNK family;Mut7-C RNAse domain;Oxoglutarate/iron-dependent dioxygenase;Protein kinase domain;Protein kinase-like domain superfamily;Protein of unknown function DUF4228, plant;Ribonuclease H superfamily;Ribonu…
Q5Z4Z2.1	Homologous	107	61.592	84.1253	49.5301	Q7XKX2.2(199.2);Q5Z4Y6.1(189.9);	Os06g0309700 protein			Q2R0B4.1(15.5);A0A0P0X4X2.1(12.4);C7IYE5.1(12.0);Q6ATB4.1(11.6);	EF-Hand 1, calcium-binding site;EF-hand domain;EF-hand domain pair;HAT, C-terminal dimerisation domain;HD/PDEase domain;Leucine-rich repeat domain superfamily;RelA/SpoT;Ribonuclease H-like superfamily;Ribosomal protein Rsm22-like;Rx, N-terminal;S-adenosyl-L-methionine-dependent methyltransferase;Virus X resistance protein-like, coiled-coil domain;Zinc finger C2H2 superfamily;Zinc finger, BED-type;
A0A0P0XQR8.1	Single-copy	106	115.293	67.0916	49.322		Os09g0529801 protein			Q56UD1.3(39.5);Q0J360.1(23.9);C7J796.1(23.1);Q56UD0.1(16.1);A0A0P0Y868.1(12.0);	A/G-specific adenine glycosylase MutY;Concanavalin A-like lectin/glucanase domain superfamily;DNA glycosylase;Endonuclease III, iron-sulphur binding site;Glycoside hydrolase, family 32;Glycosyl hydrolase family 32, C-terminal;Glycosyl hydrolase family 32, N-terminal;Glycosyl hydrolase, five-bladed beta-propellor domain superfamily;Helix-turn-helix, base-excision DNA repair, C-terminal;HhH-GPD dom…
A0A0P0X4C2.1	Single-copy	102	535.484	47.0892	49.192		FAE domain-containing protein	Very-long-chain 3-ketoacyl-CoA synthase;FAE1/Type III polyketide synthase-like protein;Thiolase-like;		Q6Z6C7.1(112.8);Q688V9.1(108.0);Q10P61.1(102.6);Q10PV5.1(98.3);Q5Z6S3.1(85.2);Q8LQT7.1(70.0);Q10QW1.1(63.9);Q6K558.1(50.8);	3-Oxoacyl-[acyl-carrier-protein (ACP)] synthase III, C-terminal;FAE1/Type III polyketide synthase-like protein;Thiolase-like;Very-long-chain 3-ketoacyl-CoA synthase;
A0A0P0VPY7.1	Homologous	127	94.5036	70.7874	49.1112	A0A0P0W9E0.1(31.5);	Os02g0751750 protein			A0A0N7KQ54.1(45.0);A0A0P0XP42.1(25.3);A0A0P0WTL0.1(24.8);A0A0P0XNK5.1(23.3);Q5SNM6.1(22.4);Q2QXA0.2(20.1);	F-box associated domain, type 1;F-box associated domain, type 3;F-box associated interaction domain;F-box domain;F-box-like domain superfamily;Galactose oxidase/kelch, beta-propeller;
A0A0P0VPQ4.1	Single-copy	94	49.1059	140.233	49.0622		Os02g0737801 protein			Q2QMD5.1(22.3);Q2QMD1.1(15.5);	Gnk2-homologous domain;Gnk2-homologous domain superfamily;Protein kinase domain;Protein kinase, ATP binding site;Protein kinase-like domain superfamily;Serine/threonine-protein kinase, active site;
Q6H6Q4.1	Single-copy	91	50.8411	102.86	49.0082		Os02g0527700 protein			Q10GH8.1(15.5);Q2R1F9.1(13.3);Q5W6H5.1(12.0);	Bacteriochlorophyll/chlorophyll synthetase;Chlorophyll synthase, ChlG;K Homology domain;K Homology domain, type 1;K Homology domain, type 1 superfamily;Leucine rich repeat 4;Leucine-rich repeat domain superfamily;Leucine-rich repeat, typical subtype;NB-ARC;P-loop containing nucleoside triphosphate hydrolase;UbiA prenyltransferase family;
A0A0P0XU69.1	Single-copy	101	256.407	55.5228	48.8077		Os10g0364001 protein			A0A0P0XTE2.1(46.6);A0A0P0Y1V1.1(34.6);Q53NZ3.1(31.0);Q9MBF2.1(27.2);Q2QWD6.1(24.2);C7J3D2.1(23.0);A2ZU51.1(22.9);A0A0P0XDC6.1(22.4);A0A0P0XP47.1(21.7);	Leucine-rich repeat domain superfamily;NB-ARC;P-loop containing nucleoside triphosphate hydrolase;Rx, N-terminal;Virus X resistance protein-like, coiled-coil domain;
A0A0N7KT40.1	Homologous	129	158.676	61.8767	48.7762	A0A0P0Y3U0.1(104.6);A0A0P0Y3P4.1(39.3);	DUF3444 domain-containing protein	Domain of unknown function DUF3444;		Q94H83.1(56.3);Q8RYF9.1(55.9);Q6K2F0.1(53.2);	Chaperone J-domain superfamily;DnaJ domain;DnaJ domain, conserved site;Domain of unknown function DUF3444;
A0A0P0XS28.1	Homologous	150	67.1809	79.6293	48.6194	Q94HP4.1(39.2);A0A0P0VL63.1(33.2);	Os10g0163310 protein			Q10PI6.1(95.4);Q10DG8.1(84.9);	Alpha/Beta hydrolase fold;Lecithin:cholesterol/phospholipid:diacylglycerol acyltransferase;
A0A0P0VZY2.1	Single-copy	139	138.291	63.8683	48.5869		Os03g0555000 protein			Q6ZKV8.1(111.7);Q9FW88.1(24.5);Q6YUK5.1(20.3);Q60DW1.1(14.6);	Aminotransferase class-III;Chaperone tailless complex polypeptide 1 (TCP-1);Chaperonin Cpn60/TCP-1 family;Chaperonin TCP-1, conserved site;Dethiobiotin synthase BioD;GroEL-like apical domain superfamily;GroEL-like equatorial domain superfamily;K Homology domain;K Homology domain, type 1;K Homology domain, type 1 superfamily;P-loop containing nucleoside triphosphate hydrolase;Pyridoxal phosphate-d…
A0A0P0W2Z8.1	Single-copy	91	48.4024	178.941	48.4015		Os03g0718650 protein			Q53NY5.1(18.4);Q2QWK9.2(15.8);Q6Z868.1(15.4);Q6EPA2.1(12.5);	Aldolase-type TIM barrel;Hydroxymethylpyrimidine kinase/phosphomethylpyrimidine kinase;Plastid division protein PDV1/PDV2;Protein of unknown function DUF1685;Protein of unknown function DUF2232;Pyridoxamine kinase/Phosphomethylpyrimidine kinase;Ribokinase-like;Thiamin phosphate synthase superfamily;Thiamine phosphate synthase;Thiamine phosphate synthase/TenI;
A0A0N7KF56.1	Homologous	75	627.329	45.1667	48.3262	Q0IZ52.2(51.0);	Os02g0305300 protein			Q6L4D7.1(84.7);Q6L4D9.1(80.5);Q0J403.1(70.3);Q0J400.1(69.8);Q6ZJF8.1(60.5);A0A0P0VI21.1(58.3);B9GCC0.1(35.3);	Leucine-rich repeat domain superfamily;Leucine-rich repeat, typical subtype;NB-ARC;P-loop containing nucleoside triphosphate hydrolase;Rx, N-terminal;Virus X resistance protein-like, coiled-coil domain;
A0A0N7KRJ0.1	Homologous	102	284.616	54.0245	47.9078	A0A0P0W360.1(144.3);	Os10g0185200 protein	Dynamin superfamily;		Q654U5.1(94.1);Q0DXR0.1(87.7);Q0J5L5.1(55.3);Q10SM7.1(12.8);	Dynamin GTPase effector;Dynamin central domain;Dynamin superfamily;Dynamin, GTPase domain;Dynamin, GTPase region, conserved site;Dynamin-type guanine nucleotide-binding (G) domain;GTPase effector domain;P-loop containing nucleoside triphosphate hydrolase;PH-like domain superfamily;Peroxisomal biogenesis factor 11;Pleckstrin homology domain;
A0A0N7KPP7.1	Single-copy	137	179.107	59.9234	47.8999		DUF630 domain-containing protein	Domain of unknown function DUF630;Purine permease, plant;		B7E3F9.1(51.8);A0A0P0V2Y7.1(29.5);Q0IZV2.1(25.3);A0A0P0XJ51.1(23.6);Q6I609.1(19.2);Q6ZGZ0.1(17.4);Q10M67.1(17.2);Q8H4U8.1(16.5);Q6K5E9.1(16.4);	Domain of unknown function DUF630;Domain of unknown function DUF632;Nitrate regulatory gene2 protein;Purine permease, plant;
A0A0P0X8D1.1	Single-copy	73	47.9092	137.107	47.8509		Os07g0581550 protein			C7J9F5.1(13.6);Q6L4I3.1(11.5);Q2RAT3.2(10.3);	DYW domain;F-box domain;F-box-like domain superfamily;Kelch repeat type 1;Kelch-type beta propeller;Pentatricopeptide repeat;Tetratricopeptide-like helical domain superfamily;
A0A0P0WHU4.1	Single-copy	118	64.8721	80.2721	47.7702		Os05g0140400 protein			A0A0P0VWD5.1(43.0);Q6Z869.1(34.3);A0A0P0XT53.1(13.0);	Cupredoxin;Homeobox-like domain superfamily;Laccase, first cupredoxin domain;Laccase, second cupredoxin domain;Multicopper oxidase, type 1;Multicopper oxidase, type 3;Myb domain;Myb domain, plants;Nucleic acid-binding, OB-fold;Ribosomal protein S12/S23;SANT/Myb domain;
Q7XKX2.2	Homologous	107	61.592	82.3253	47.6883	Q5Z4Z2.1(199.3);Q5Z4Y6.1(188.0);	OSJNBa0035I04.10 protein			Q2R0B4.1(15.5);A0A0P0X4X2.1(12.4);C7IYE5.1(12.0);Q6ATB4.1(11.6);	EF-Hand 1, calcium-binding site;EF-hand domain;EF-hand domain pair;HAT, C-terminal dimerisation domain;HD/PDEase domain;Leucine-rich repeat domain superfamily;RelA/SpoT;Ribonuclease H-like superfamily;Ribosomal protein Rsm22-like;Rx, N-terminal;S-adenosyl-L-methionine-dependent methyltransferase;Virus X resistance protein-like, coiled-coil domain;Zinc finger C2H2 superfamily;Zinc finger, BED-type;
A0A0P0XD20.1	Homologous	128	58.8106	84.4953	47.6322	A0A0P0XDA9.1(255.8);	Os08g0215900 protein			A0A0P0WQ76.1(103.6);Q6Z5Z5.1(13.1);	Osmotin/thaumatin-like superfamily;Protein of unknown function DUF247, plant;Thaumatin family;
A0A0P0V9C1.1	Single-copy	98	47.5696	117.818	47.1743		Os01g0802900 protein			A0A0P0WPW9.1(15.6);Q6YWQ0.1(15.2);A0A0P0VSF8.1(11.1);Q941X1.1(10.4);	Aspartic peptidase A1 family;Aspartic peptidase domain superfamily;Aspartic peptidase, active site;Cullin repeat-like-containing domain superfamily;E3 ubiquitin-protein ligase BOI-like;Exocyst complex component Exo70;Nucellin;Peptidase family A1 domain;Protein of unknown function DUF3615;Xylanase inhibitor, C-terminal;Xylanase inhibitor, N-terminal;
A0A0P0X0C9.1	Homologous	123	95.6014	69.7195	47.1304	Q7F2X8.1(51.1);Q5TKK2.1(39.9);A0A0P0WAK6.1(36.6);B7F8B0.1(36.4);	RRM domain-containing protein			Q75LJ7.1(108.7);Q6K271.1(103.3);	Nucleotide-binding alpha-beta plait domain superfamily;Paraneoplastic encephalomyelitis antigen;RNA recognition motif domain;RNA-binding domain superfamily;WW domain;WW domain superfamily;Zinc finger, CCHC-type;Zinc finger, CCHC-type superfamily;
A0A0P0WIC2.1	Single-copy	90	50.7446	95.5144	47.0742		Os05g0169450 protein			Q0E2Y9.1(18.2);Q7XLD2.2(16.7);Q65WW2.1(11.8);Q75IR6.1(11.3);Q69PI3.1(10.3);	Alfin;F-box domain;F-box-like domain superfamily;Glycosyl transferase, family 31;Kelch repeat type 1;Kelch-type beta propeller;NTF2-like domain superfamily;Protein of unknown function DUF2358;Protein of unknown function DUF4228, plant;Zinc finger, FYVE/PHD-type;Zinc finger, PHD-finger;Zinc finger, PHD-type;Zinc finger, PHD-type, conserved site;Zinc finger, RING/FYVE/PHD-type;
A0A0P0W1E9.1	Single-copy	80	83.4994	72.5625	47.0698		Os03g0652600 protein			Q7XZZ2.1(62.5);	CCR4-NOT complex subunit 2/3/5, N-terminal domain superfamily;CCR4-NOT complex, subunit 3/ 5;CCR4-Not complex component, Not N-terminal domain;NOT2/NOT3/NOT5, C-terminal;Not2/Not3/Not5;
A0A0P0X839.1	Homologous	146	56.7197	85.8288	47.0553	A0A0P0X5K0.1(168.3);A0A0N7KFK0.1(34.2);	Os07g0577801 protein			Q5VR39.1(92.6);Q5ZCD0.1(11.8);	Frigida-like;Protein of unknown function DUF1110;
A0A0P0WJ53.1	Single-copy	125	47.1457	130.089	47.0301		Os05g0201333 protein			A0A0P0XBW5.1(28.8);Q9LD61.1(18.3);Q67TV5.1(16.5);Q94IW5.1(15.3);	Aspartate carbamoyltransferase;Aspartate/ornithine carbamoyltransferase;Aspartate/ornithine carbamoyltransferase superfamily;Aspartate/ornithine carbamoyltransferase, Asp/Orn-binding domain;Aspartate/ornithine carbamoyltransferase, carbamoyl-P binding;Cytochrome P450;Cytochrome P450 superfamily;Cytochrome P450, E-class, group I;Cytochrome P450, conserved site;Homeobox-like domain superfamily;Myb …
Q6H7A9.1	Single-copy	108	49.0197	101.628	47.03		Os02g0525100 protein			Q69LC0.1(15.0);Q7F1Y6.1(14.0);Q5SMN3.1(13.4);Q6AWX7.1(12.5);Q0J1Q7.1(11.1);	ATP12 orthogonal Bundle domain superfamily;ATP12, ATP synthase F1-assembly protein;ATP12, ATP synthase F1-assembly protein, N-terminal;BTB/POZ domain;E3 ubiquitin ligase RBR family;Glutamine-Leucine-Glutamine, QLQ;Growth-regulating factor;IBR domain;NPH3 domain;PDZ domain;PDZ superfamily;SKP1/BTB/POZ domain superfamily;Tetratricopeptide repeat;Tetratricopeptide repeat-containing domain;Tetratrico…
A0A0P0WW43.1	Homologous	129	162.549	60.9822	46.9253	A0A0P0VHK4.1(108.0);A0A0P0X0P2.1(30.3);	XET_C domain-containing protein	Concanavalin A-like lectin/glucanase domain superfamily;Xyloglucan endo-transglycosylase, C-terminal;		Q5Z6H3.1(113.8);Q5Z6G7.1(111.9);Q5Z6H0.1(100.8);Q0JAD6.1(98.4);Q2R336.1(94.9);Q7XTP9.2(91.3);A0A0N7KPI2.1(90.9);A0A0P0XEA0.1(90.9);Q7XNY6.1(90.0);A3AX59.1(88.0);	Beta-glucanase;Concanavalin A-like lectin/glucanase domain superfamily;Glycoside hydrolase family 16;Glycoside hydrolase, family 16, active site;Xyloglucan endo-transglycosylase, C-terminal;Xyloglucan endotransglucosylase/hydrolase;
A3BKT4.1	Single-copy	73	61.241	81.8685	46.9214		Os07g0542500 protein			Q94GG7.1(19.3);A0A0P0XTB6.1(16.1);A0A0P0V1N0.1(12.6);Q0D472.1(10.9);	TFIIS/LEDGF domain superfamily;Transcription elongation factor, TFIIS/CRSP70, N-terminal, sub-type;Transcription factor IIS, N-terminal;
Q850Z7.1	Homologous	74	54.2019	88.4149	46.783	Q8H3Z5.1(60.4);Q10MM9.1(55.6);Q656E8.1(48.6);Q0JLU6.1(48.0);Q653H1.1(44.8);Q5Z8Z1.1(33.0);	Expressed protein	Protein of unknown function DUF3511;		Q5W6Y2.1(105.3);Q6YVF0.1(62.0);Q6Z9U8.1(11.3);	Protein of unknown function DUF3511;Uncharacterised conserved protein UCP012943;
A0A0P0VQ47.1	Homologous	71	256.468	54.9986	46.781	Q0JK16.2(89.7);	Os02g0771500 protein			Q6H5Y8.1(116.4);A0A0N7KP35.1(65.3);B7F8L5.1(44.7);	Nucleotidyltransferase, class I-like, C-terminal;Poly(A) polymerase;Poly(A) polymerase, RNA-binding domain;Poly(A) polymerase, central domain;Polymerase, nucleotidyl transferase domain;
A0A0P0XJH8.1	Single-copy	79	202.108	57.9785	46.7058		Os08g0563000 protein			Q5Z6N9.1(44.8);Q6IVC3.1(27.0);Q7X993.1(24.1);Q2QXL0.1(19.9);Q6IVC2.2(19.2);Q0JNL3.1(18.9);Q53Q70.1(18.3);A0A0P0WNV7.1(15.2);Q5N7C7.1(13.9);	Basic-leucine zipper domain;Transcription factor TGA like domain;
C7J946.1	Homologous	74	1017.86	39.6257	46.5807	A0A0P0UYT6.1(32.0);	LRRNT_2 domain-containing protein	Leucine-rich repeat domain superfamily;Leucine-rich repeat-containing N-terminal, plant-type;		Q0JQH5.2(119.3);A0A0N7KCD6.1(111.0);Q2QVR3.1(109.7);A0A0P0Y8B7.1(104.9);A0A0P0Y814.1(103.1);A0A0P0Y873.1(101.9);Q2QVT4.1(96.7);	Leucine-rich repeat;Leucine-rich repeat domain superfamily;Leucine-rich repeat, typical subtype;Leucine-rich repeat-containing N-terminal, plant-type;
A0A0P0XLW7.1	Homologous	134	712.08	43.3851	46.4875	A0A0P0XLA2.1(105.2);A0A0P0XLE8.1(97.9);A0A0P0W6L0.1(30.6);	Protein kinase domain-containing protein	Protein kinase-like domain superfamily;Protein kinase domain;Serine-threonine/tyrosine-protein kinase, catalytic domain;		A0A0P0XMF0.1(115.3);Q53KU9.1(102.8);Q65X96.1(99.2);A0A0P0YBK6.1(98.3);B7F8F0.1(95.8);A0A0P0WPP1.1(91.1);Q2QMD1.1(90.2);Q2QMD5.1(88.9);Q6YX21.1(88.6);	Concanavalin A-like lectin/glucanase domain superfamily;Gnk2-homologous domain;Gnk2-homologous domain superfamily;Legume lectin domain;Legume lectin, alpha chain, conserved site;Legume lectin, beta chain, Mn/Ca-binding site;Leucine-rich repeat;Leucine-rich repeat domain superfamily;Malectin-like domain;Protein kinase domain;Protein kinase, ATP binding site;Protein kinase-like domain superfamily;S…
Q6Z8F9.1	Homologous	117	777.77	42.4359	46.4528	A0A0N7KPJ0.1(75.8);A0A0P0VT24.1(48.0);	DYW_deaminase domain-containing protein	DYW domain;		C7JA50.1(119.0);A0A0P0XPC3.1(119.0);Q10BI4.1(118.2);Q8H8N2.1(117.1);Q0IZE8.1(116.0);Q84TA9.1(115.3);Q5ZDP1.1(115.0);Q6ETD1.1(114.9);	DYW domain;Pentatricopeptide repeat;Tetratricopeptide-like helical domain superfamily;
Q6H735.1	Homologous	85	62.808	80.4035	46.41	Q0J0W3.1(36.0);	Os02g0198500 protein			Q5ZA41.1(19.8);Q6K2P4.1(15.0);Q9ASA0.1(12.0);Q0IZR1.1(10.0);	F-box domain;F-box-like domain superfamily;Galactose oxidase/kelch, beta-propeller;Kelch repeat type 1;Kelch-type beta propeller;Molybdate transporter 1/2;NAD(P)-binding domain superfamily;Short-chain dehydrogenase/reductase SDR;Tetrahydrofolate dehydrogenase/cyclohydrolase;Tetrahydrofolate dehydrogenase/cyclohydrolase, NAD(P)-binding domain;Tetrahydrofolate dehydrogenase/cyclohydrolase, catalyti…
B7F8B0.1	Homologous	116	207.037	57.5466	46.2743	Q7F2X8.1(72.3);A0A0P0WAK6.1(61.9);Q84ZB9.1(57.0);Q6ZKI2.1(54.6);Q5TKK2.1(50.8);Q5TKK0.1(49.8);Q5TKK1.1(42.7);Q0DT74.1(35.7);A0A0P0X0C9.1(35.7);	RRM domain-containing protein	Nucleotide-binding alpha-beta plait domain superfamily;RNA-binding domain superfamily;RNA recognition motif domain;		Q7XTT4.2(112.1);Q75LJ7.1(111.8);Q6K271.1(110.1);	NUCL, RNA recognition motif 1;Nucleotide-binding alpha-beta plait domain superfamily;Paraneoplastic encephalomyelitis antigen;RNA recognition motif domain;RNA-binding domain superfamily;WW domain;WW domain superfamily;Zinc finger, CCHC-type;Zinc finger, CCHC-type superfamily;
A0A0P0XXE6.1	Single-copy	93	670.684	43.97	46.2407		Os10g0568500 protein	Peptidase S8/S53 domain superfamily;		Q8H047.1(74.2);Q8RVC2.1(72.8);Q6ESH8.1(57.2);A0A0P0VYZ5.1(52.0);Q0D3H9.1(51.7);A0A0P0WDQ9.1(51.6);Q6K7G5.1(48.4);Q10P89.1(47.4);A0A0P0WYV3.1(45.7);A0A0P0XGM3.1(45.5);	Cucumisin-like catalytic domain;PA domain;Peptidase S8 propeptide/proteinase inhibitor I9;Peptidase S8 propeptide/proteinase inhibitor I9 superfamily;Peptidase S8, subtilisin, Asp-active site;Peptidase S8, subtilisin, Ser-active site;Peptidase S8, subtilisin-related;Peptidase S8/S53 domain;Peptidase S8/S53 domain superfamily;RING-type zinc-finger, LisH dimerisation motif;Subtilisin-like protease,…
Q657N1.1	Single-copy	74	216.539	56.8878	45.9677		Os01g0322300 protein	Inorganic pyrophosphatase;Inorganic pyrophosphatase superfamily;		Q7XTL6.2(107.4);Q5N9F4.1(92.5);Q75HX3.1(92.1);Q338G1.1(83.6);Q75L10.1(82.9);Q0DYB1.1(80.4);B7F8Y9.1(79.0);	Inorganic pyrophosphatase;Inorganic pyrophosphatase superfamily;
A0A0P0Y364.1	Single-copy	124	80.3804	72.8645	45.9074		Os11g0540050 protein			Q69P90.1(45.9);Q6ZI99.1(22.5);Q2RAC2.2(14.0);	Cullin repeat-like-containing domain superfamily;Exocyst complex component Exo70;
A0A0P0XCE7.1	Single-copy	125	69.9681	76.4272	45.8548		Os08g0162250 protein			Q2QX42.1(20.0);Q5NAB7.1(20.0);Q7XC34.1(13.4);Q10M67.1(12.6);	Domain of unknown function DUF630;Domain of unknown function DUF632;K Homology domain;K Homology domain, type 1;K Homology domain, type 1 superfamily;Nitrate regulatory gene2 protein;Pentacotripeptide-repeat region of PRORP;Pentatricopeptide repeat;Tetratricopeptide-like helical domain superfamily;
A0A0P0X0Q0.1	Single-copy	86	56.8541	84.1186	45.7141		Os06g0690100 protein	Pentatricopeptide repeat;Tetratricopeptide-like helical domain superfamily;		C7J0P7.1(46.4);	DYW domain;Pentatricopeptide repeat;Tetratricopeptide-like helical domain superfamily;
A0A0P0XB04.1	Single-copy	66	102.482	67.8303	45.704		Os08g0108925 protein			Q8H4S9.1(65.2);Q33B71.1(30.9);A0A0P0WLL3.1(13.5);	Alpha/Beta hydrolase fold;Alpha/beta hydrolase fold-1;Serine aminopeptidase, S33;
A0A0P0WNL7.1	Single-copy	89	47.1866	103.885	45.6457		Os05g0473766 protein			Q5NTH3.1(17.5);Q5NTH4.1(15.0);Q7X7H9.2(13.8);A0A0P0VZB6.1(12.0);	Cytochrome P450;Cytochrome P450 superfamily;Cytochrome P450, E-class, group I;P-loop containing nucleoside triphosphate hydrolase;Shikimate kinase, conserved site;Shikimate kinase/Threonine synthase-like 1;Shikimate kinase/gluconokinase;
A0A0P0WAV1.1	Single-copy	134	47.2718	102.31	45.4747		Os04g0446050 protein			A0A0P0Y2S5.1(18.2);Q5W6G3.1(17.1);A0A0N7KRS2.1(16.5);A0A0P0WM79.1(14.6);Q0DS59.2(12.9);Q7XU86.3(11.5);	BTB/POZ domain;Cytochrome P450;Cytochrome P450 superfamily;Cytochrome P450, E-class, group I;Cytochrome P450, conserved site;Exonuclease, RNase T/DNA polymerase III;Homeobox-like domain superfamily;Myb domain;Myb domain, plants;Potassium channel tetramerisation-type BTB domain;Protein of unknown function DUF620;Quinoprotein alcohol dehydrogenase-like superfamily;Ribonuclease H superfamily;Ribonuc…
A0A0P0W6L0.1	Homologous	122	664.698	43.8295	45.2321	A0A0P0XRC5.1(96.5);A0A0P0W6I1.1(74.5);A0A0P0W6I7.1(47.4);A0A0P0XLA2.1(39.7);A0A0P0X7E8.1(38.5);A0A0P0XLW7.1(31.2);	Pkinase_Tyr domain-containing protein	Protein kinase-like domain superfamily;Serine-threonine/tyrosine-protein kinase, catalytic domain;		B7F8F0.1(119.0);A0A0P0XLU8.1(118.1);Q6YX21.1(116.8);A0A0N7KQM4.1(116.2);Q0JF98.1(112.1);A0A0P0XKH9.1(111.7);A0A0P0XMD4.1(111.6);	Concanavalin A-like lectin/glucanase domain superfamily;Legume lectin domain;Legume lectin, alpha chain, conserved site;Legume lectin, beta chain, Mn/Ca-binding site;Leucine-rich repeat domain superfamily;Malectin-like domain;Protein kinase domain;Protein kinase, ATP binding site;Protein kinase-like domain superfamily;Serine-threonine/tyrosine-protein kinase, catalytic domain;Serine/threonine-pro…
Q5JM44.1	Homologous	109	82.7162	71.8257	45.123	Q75K56.1(53.6);Q0DGQ0.1(48.7);Q5JM47.1(41.6);	Os01g0727700 protein	Senescence regulator S40;		A0A0P0V888.1(103.7);Q53QG6.1(78.3);Q7XVJ5.2(72.2);Q5N7G7.1(69.1);Q8GZX5.1(65.0);A0A0P0Y713.1(63.7);Q7XUJ4.1(63.2);Q7XUA4.1(58.3);A0A0P0XVF5.1(58.0);Q6Z2H5.1(48.9);	Senescence regulator S40;
A0A0P0WUE4.1	Single-copy	131	47.6078	98.5779	45.0237		Os06g0233101 protein			Q6AWY7.1(16.8);Q7XTN8.2(15.7);Q5ZCV7.1(12.4);Q5QN02.1(10.1);	AAA+ ATPase domain;ATP-grasp fold;ATP-grasp fold, ATP-dependent carboxylate-amine ligase-type;ATP-grasp fold, subdomain 1;ATPase, AAA-type, conserved site;ATPase, AAA-type, core;Class I PurE;Glutamine-Leucine-Glutamine, QLQ;Growth-regulating factor;Homeobox-like domain superfamily;Myb-like domain;No apical meristem-associated, C-terminal domain;P-loop containing nucleoside triphosphate hydrolase;…
A0A0P0V9L7.1	Single-copy	115	243.217	55.1791	45.0226		Os01g0819300 protein			Q69JE2.1(119.0);A0A0P0V9S4.1(112.0);Q6ETC4.1(91.8);B9FQJ7.1(59.8);Q7XAL6.1(20.0);	C2 domain;C2 domain superfamily;Synaptotagmin, SMP domain;Synaptotagmin-like mitochondrial-lipid-binding domain;
C7IZK0.1	Single-copy	87	187.64	58.4414	44.9249		Os03g0816950 protein			A0A0N7KEX1.1(21.8);A0A0P0VDQ9.1(16.9);Q5ZD75.1(15.6);B9GEB8.1(14.6);Q6YT77.1(13.8);Q658G7.1(12.8);Q9LGI5.1(11.7);Q6YVY8.1(11.3);	Leucine-rich repeat;Leucine-rich repeat domain superfamily;Leucine-rich repeat, typical subtype;Leucine-rich repeat-containing N-terminal, plant-type;Protein kinase domain;Protein kinase, ATP binding site;Protein kinase-like domain superfamily;Serine/threonine-protein kinase, active site;
A0A0P0V182.1	Homologous	65	210.149	56.9569	44.8545	A0A0P0VRB0.1(43.8);	Os01g0287400 protein			A0A0P0UYZ2.1(83.8);A0A0P0W1C4.1(51.8);A0A0P0Y561.1(14.5);	Domain of unknown function DUF4220;Papain-like cysteine peptidase superfamily;Peptidase C19, ubiquitin carboxyl-terminal hydrolase;Protein of unknown function DUF594;Reverse transcriptase domain;Reverse transcriptase zinc-binding domain;Ubiquitin specific protease domain;Ubiquitin specific protease, conserved site;
A0A0P0WTA9.1	Homologous	141	1170.04	37.7702	44.8245	A0A0P0Y3H3.1(52.9);A0A0P0WY54.1(37.3);A0A0P0X7T6.1(35.8);A0A0P0XZG4.1(34.6);A0A0P0XLA2.1(34.3);C7J989.1(32.4);A0A0P0X7E8.1(30.3);	Pkinase_Tyr domain-containing protein			Q2R9X8.1(120.0);Q6Z5A7.1(119.5);Q53PC9.1(118.1);A0A0P0VGF0.1(118.1);C7J886.1(117.7);A0A0N7KEX1.1(117.1);B9FTY2.1(116.0);Q69KC4.1(114.7);Q53PC8.1(114.4);Q2R2D8.1(113.7);	Gnk2-homologous domain;Gnk2-homologous domain superfamily;Leucine rich repeat 4;Leucine-rich repeat;Leucine-rich repeat domain superfamily;Leucine-rich repeat, typical subtype;Leucine-rich repeat-containing N-terminal, plant-type;Protein kinase domain;Protein kinase, ATP binding site;Protein kinase-like domain superfamily;Serine-threonine/tyrosine-protein kinase, catalytic domain;Serine/threonine…
A0A0P0X4Q7.1	Homologous	44	62.2068	79.3955	44.7272	A0A0P0WWU4.1(33.4);	Os07g0246300 protein			Q6Z717.1(76.8);	CDP-alcohol phosphatidyltransferase;CDP-diacylglycerol-inositol 3-phosphatidyltransferase, eukaryote;
A0A0P0WUM9.1	Single-copy	87	219.343	56.3632	44.6678		Os06g0239600 protein			Q5Z5W7.1(84.8);Q2QX12.1(28.9);A0A0P0XI64.1(27.1);Q2R4A8.2(22.4);Q6ESK1.1(22.2);Q0DHQ1.1(17.2);	GDP-fucose protein O-fucosyltransferase;Putative O-fucosyltransferase, plant;
C7JAB6.1	Homologous	102	53.8022	85.5452	44.4173	Q0JLV5.1(60.9);Q2QX17.1(59.0);	Os12g0103300 protein			Q69MD4.1(17.8);A0A0P0VRQ0.1(16.3);Q337H3.1(12.0);Q7X5X8.2(11.2);Q8S7W9.1(11.1);	1-acyl-sn-glycerol-3-phosphate acyltransferase;Aspartic peptidase A1 family;Aspartic peptidase domain superfamily;Aspartic peptidase, active site;Helix-turn-helix motif;Homeobox domain;Homeobox, conserved site;Homeobox-like domain superfamily;K Homology domain;K Homology domain, type 1;K Homology domain, type 1 superfamily;Leucine zipper, homeobox-associated;Pepsin-like domain;Peptidase family A1…
A0A0P0Y1F3.1	Homologous	66	91.0895	69.5015	44.4098	A0A0P0Y136.1(65.8);	Os11g0236932 protein			Q5Z916.1(14.3);A0A0P0XS14.1(13.2);Q2R941.1(12.4);Q5VQM7.1(12.3);Q5SMV5.1(12.1);	Alpha/Beta hydrolase fold;G protein alpha subunit, helical insertion;GDSL lipase/esterase;GDSL lipase/esterase-like, plant;Guanine nucleotide binding protein (G-protein), alpha subunit;Haem peroxidase;Haem peroxidase superfamily;Leucine-rich repeat;Leucine-rich repeat domain superfamily;Leucine-rich repeat, typical subtype;Leucine-rich repeat-containing N-terminal, plant-type;P-loop containing nu…
A0A0P0WJ44.1	Single-copy	76	46.6722	99.3593	44.3196		Os05g0206400 protein			Q6I5V5.1(40.3);	Amidophosphoribosyltransferase;Amidophosphoribosyltransferase, N-terminal;Glutamine amidotransferase type 2 domain;Nucleophile aminohydrolases, N-terminal;Phosphoribosyltransferase domain;Phosphoribosyltransferase-like;
B9G163.1	Single-copy	92	59.8357	80.4772	44.2985		Os08g0444440 protein			A0A0P0X1B1.1(17.4);Q6K647.1(15.0);Q53LV0.1(14.9);Q6ZBS8.1(14.8);	Basic-leucine zipper domain;Cullin repeat-like-containing domain superfamily;Exocyst complex component Exo70;Protein of unknown function DUF707;The fantastic four family;Transcription factor TGA like domain;
A0A0P0WT99.1	Single-copy	91	47.8386	95.1813	44.27		Os06g0165700 protein			A0A0P0XK84.1(16.4);A0A0P0XKI1.1(14.7);Q10S77.1(12.9);	AAA+ ATPase domain;ABC transporter, conserved site;ABC transporter-like;ABC-2 type transporter;Ankyrin repeat;Ankyrin repeat-containing domain;Ankyrin repeat-containing domain superfamily;P-loop containing nucleoside triphosphate hydrolase;Poly A polymerase, head domain;tRNA nucleotidyltransferase/poly(A) polymerase, RNA and SrmB- binding domain;
A0A0P0X3L0.1	Single-copy	147	306.215	52.2088	44.2212		Os07g0183050 protein			A3BH91.1(51.3);Q7XSS9.2(50.9);Q8H506.1(48.0);Q5JK20.1(34.8);Q8S983.1(34.4);Q7XKK6.3(33.8);Q6H6V4.1(32.4);Q0J951.1(32.3);Q6K223.1(31.3);	AUX/IAA domain;Auxin response factor;B3 DNA binding domain;DNA-binding pseudobarrel domain superfamily;PB1 domain;
A0A0P0VWD7.1	Single-copy	82	181.645	58.6573	44.2077		Os03g0295666 protein			A0A0P0X9Z0.1(72.4);A0A0P0X7C9.1(29.3);Q7XIS7.1(19.8);Q7XHL0.1(15.3);A0A0P0V3S2.1(12.4);A0A0N7KNG2.1(12.2);	Gnk2-homologous domain;Gnk2-homologous domain superfamily;Protein kinase domain;Protein kinase, ATP binding site;Protein kinase-like domain superfamily;S-locus receptor kinase, C-terminal;Serine-threonine/tyrosine-protein kinase, catalytic domain;Serine/threonine-protein kinase, active site;
C7J518.1	Single-copy	95	581.979	44.94	43.9037		MULE domain-containing protein			Q5VRR4.1(81.8);A0A0P0VAD9.1(77.6);A0A0P0VAC7.1(77.5);A0A0P0VHJ2.1(76.6);Q0E2Z0.1(75.6);A0A0P0V514.1(67.8);Q6K1Y4.1(65.0);	FAR1 DNA binding domain;FHY3/FAR1 family;MULE transposase domain;Papain-like cysteine peptidase superfamily;Ulp1 protease family, C-terminal catalytic domain;Zinc finger, PMZ-type;Zinc finger, SWIM-type;
A0A0P0XSQ5.1	Single-copy	26	277.558	53.2654	43.844		Os10g0213100 protein			Q6ZCF0.1(39.6);Q7XN11.2(38.8);Q6ZH29.1(38.3);Q7XN12.2(37.6);Q10G56.1(14.7);	Aminotransferase class-III;Ornithine aminotransferase;Ornithine aminotransferase, mitochondrial;Pyridoxal phosphate-dependent transferase;Pyridoxal phosphate-dependent transferase domain 1;Pyridoxal phosphate-dependent transferase, major domain;
A0A0P0XVF9.1	Single-copy	85	49.2043	91.0047	43.8385		Os10g0445900 protein			Q8H8G8.1(17.5);Q5NBM8.2(16.5);Q2R837.1(15.5);Q67V81.1(12.1);	Alfin;Cyclin;Cyclin, C-terminal domain;Cyclin, N-terminal;Cyclin-like;Cyclin-like superfamily;Homeobox-like domain superfamily;Myb domain;Myb-like transcription factor;Nucleotide-binding alpha-beta plait domain superfamily;PHIP1, RNA recognition motif 1;RNA recognition motif domain;RNA-binding domain superfamily;SANT/Myb domain;Zinc finger, FYVE/PHD-type;Zinc finger, PHD-finger;Zinc finger, PHD-t…
Q0JIJ4.1	Single-copy	121	134.183	62.7347	43.7379		Os01g0797800 protein			A0A0P0VGE5.1(76.7);Q69UE9.1(63.3);Q53NA8.1(47.0);A0A0N7KFI1.1(34.5);A0A0N7KJC3.1(32.5);Q338Q9.1(28.5);	F-box domain;F-box-like domain superfamily;Kelch repeat type 1;Kelch-type beta propeller;Ssl1-like;TFIIH C1-like domain;TFIIH subunit Ssl1/p44;Zinc finger C2H2-type;Zinc finger, RING/FYVE/PHD-type;von Willebrand factor A-like domain superfamily;von Willebrand factor, type A;
B9F675.1	Homologous	90	69.2305	75.2956	43.5723	A0A0P0XGA8.1(138.8);A0A0N7KJT6.1(138.7);	Os03g0216550 protein			Q7XTN2.2(20.7);Q69QY7.1(20.1);Q5ZEM2.1(17.8);	Transmembrane protein DDB_G0292058-like;
A0A0P0Y681.1	Single-copy	133	49.1227	90.4911	43.5157		Os12g0117900 protein			Q0IWS0.1(69.9);A0A0P0XW86.1(45.8);Q2RAS2.2(13.2);A0A0P0WAJ1.1(11.2);	DNA2/NAM7 helicase, AAA domain;DNA2/NAM7 helicase-like, AAA domain;Mitochondrial glycoprotein;Mitochondrial glycoprotein superfamily;P-loop containing nucleoside triphosphate hydrolase;Protein TIC110, chloroplastic;
C7J556.1	Homologous	144	575.301	44.9681	43.5126	A0A0P0VGB8.1(32.2);A0A0P0YCZ3.1(31.7);	Pkinase_Tyr domain-containing protein	Protein kinase-like domain superfamily;Serine-threonine/tyrosine-protein kinase, catalytic domain;		Q851M7.1(102.4);Q5Z8B7.1(97.1);Q653V5.1(96.3);A0A0P0WF90.1(94.2);Q7Y1P1.1(93.7);Q7XN81.2(93.3);Q8LQN6.1(92.1);A0A0N7KT65.1(92.0);A0A0N7KR84.1(91.3);	Bulb-type lectin domain;Bulb-type lectin domain superfamily;EGF-like domain;Gnk2-homologous domain;Gnk2-homologous domain superfamily;PAN/Apple domain;Protein kinase domain;Protein kinase, ATP binding site;Protein kinase-like domain superfamily;S-locus glycoprotein domain;S-locus receptor kinase, C-terminal;S-receptor-like serine/threonine-protein kinase;Serine-threonine/tyrosine-protein kinase, …
A0A0P0WEW8.1	Single-copy	149	60.095	79.6362	43.4995		Os04g0617200 protein			A0A0P0XMB6.1(19.4);Q10DV4.1(19.1);Q2QMD5.1(17.2);A0A0P0VIP0.1(16.2);	Concanavalin A-like lectin/glucanase domain superfamily;Cytochrome c oxidase assembly protein CtaG/Cox11;Cytochrome c oxidase assembly protein CtaG/Cox11, domain superfamily;Gnk2-homologous domain;Gnk2-homologous domain superfamily;Legume lectin domain;Protein kinase domain;Protein kinase, ATP binding site;Protein kinase-like domain superfamily;Serine/threonine-protein kinase, active site;WD40 re…
A0A0P0XEW4.1	Homologous	133	381.421	49.4835	43.4383	A0A0P0WK94.1(73.4);A0A0P0XTV6.1(36.8);	Os08g0331100 protein			A0A0P0WH66.1(110.9);Q8LMI4.1(99.0);Q338X7.1(96.7);Q7XXN4.1(90.1);Q7XPK7.1(86.0);Q7XXN5.1(82.5);Q10QS0.1(79.6);Q2R0K3.1(74.4);Q2R0J4.1(73.0);Q69P55.1(42.8);	Chloramphenicol acetyltransferase-like domain superfamily;Transferase;
A0A0P0XGC7.1	Single-copy	103	477.289	46.9612	43.3387		Os08g0446700 protein	Ribonuclease H-like superfamily;		A0A0P0VZA9.1(69.5);A0A0P0X6L2.1(69.0);A0A0P0XUP5.1(68.3);A0A0P0VJT3.1(68.3);Q6AVI0.1(68.1);B9FJG3.1(64.1);A0A0P0WJI1.1(58.3);	HAT, C-terminal dimerisation domain;Ribonuclease H-like superfamily;Zinc finger C2H2 superfamily;Zinc finger, BED-type;hAT-like transposase, RNase-H fold;
A0A0P0Y8C8.1	Homologous	99	76.9197	72.5465	43.3304	A0A0P0Y7G5.1(199.3);	Os12g0228450 protein			Q53NS7.1(32.1);A0A0P0X7F2.1(29.9);A5HBA7.1(23.0);	Harbinger transposase-derived protein;
Q0E0J7.1	Single-copy	93	173.064	59.028	43.3116		Os02g0545000 protein			Q67VX5.1(78.6);A0A0P0V4I7.1(47.5);	Class XI myosin, cargo binding domain;Dilute domain;IQ motif, EF-hand binding site;Kinesin motor domain superfamily;Myosin head, motor domain;Myosin, N-terminal, SH3-like;P-loop containing nucleoside triphosphate hydrolase;Plant myosin, class XI, motor domain;
A0A0P0Y0I3.1	Homologous	98	617.421	44.0949	43.0661	A0A0P0W8D1.1(77.8);	Os11g0227400 protein	Leucine-rich repeat domain superfamily;		Q53P15.1(116.7);Q6YUT7.1(64.0);Q8W2U9.1(58.9);Q84ZM1.1(55.2);Q7XB93.1(52.2);Q652D6.1(47.9);Q9AYH9.2(43.6);Q2QV19.1(42.2);	Leucine-rich repeat;Leucine-rich repeat domain superfamily;NB-ARC;P-loop containing nucleoside triphosphate hydrolase;Rx, N-terminal;Virus X resistance protein-like, coiled-coil domain;
A0A0P0XCW6.1	Single-copy	115	43.5674	113.27	42.9994		Os08g0193650 protein			Q6Z846.1(29.2);Q6Z072.1(19.8);Q6AVU2.1(18.0);	ERO1-like superfamily;Endoplasmic reticulum oxidoreductin 1;F-box domain;F-box-like domain superfamily;Leucine-rich repeat;Leucine-rich repeat domain superfamily;Leucine-rich repeat, cysteine-containing subtype;
C7J4Z6.1	Single-copy	126	161.299	59.8627	42.9459		PEROXIDASE_4 domain-containing protein			Q9FYP0.1(64.8);A0A0P0WHP0.1(56.4);Q69QL4.1(56.0);Q6AVZ8.1(47.2);A0A0P0VXU6.1(42.9);Q6AVZ7.1(41.6);Q10KW1.1(38.8);Q5U1Q1.1(38.8);	Haem peroxidase;Haem peroxidase superfamily;Peroxidase, active site;Peroxidases heam-ligand binding site;Plant peroxidase;Secretory peroxidase;
A0A0N7KE15.1	Single-copy	128	46.7873	93.4523	42.696		Os01g0840900 protein			Q8LN25.1(44.8);Q7X7K7.1(10.8);	Aluminum-activated malate transporter;Homeobox KN domain;Homeobox domain;Homeobox-like domain superfamily;POX domain;
A0A0N7KQ49.1	Homologous	149	602.809	44.2443	42.6351	A0A0P0VYU6.1(46.0);A0A0P0XCR0.1(33.0);A0A0P0X7E8.1(32.9);	Os08g0514066 protein			Q7F271.1(107.3);A0A0N7KKF3.1(105.6);Q7XXF5.2(103.9);A0A0N7KJP8.1(101.0);Q6Z5A7.1(100.8);A0A0P0WJV8.1(95.2);A0A0P0XDF2.1(92.2);A0A0P0WK53.1(89.6);	Concanavalin A-like lectin/glucanase domain superfamily;Gnk2-homologous domain;Gnk2-homologous domain superfamily;Legume lectin domain;Leucine-rich repeat domain superfamily;Malectin domain;Protein kinase domain;Protein kinase, ATP binding site;Protein kinase-like domain superfamily;Serine-threonine/tyrosine-protein kinase, catalytic domain;Serine/threonine-protein kinase, active site;
A0A0N7KDH2.1	Single-copy	98	44.719	99.2918	42.4504		Os01g0669701 protein			Q6K493.1(14.0);Q6ATB4.1(12.9);Q5ZA41.1(11.7);	EF-Hand 1, calcium-binding site;EF-hand domain;EF-hand domain pair;HD/PDEase domain;NAD(P)-binding domain superfamily;Protein SCAI;Protein SCAI, metazoan/viridiplantae;RelA/SpoT;Short-chain dehydrogenase/reductase SDR;
A0A0P0WIL5.1	Single-copy	110	43.8227	103.165	42.2886		Os05g0178850 protein			Q9FW88.1(16.6);A0A0P0VU77.1(15.6);Q6YUK5.1(15.4);Q8LH03.1(12.9);	BTB/POZ domain-containing protein;Chaperone tailless complex polypeptide 1 (TCP-1);Chaperonin Cpn60/TCP-1 family;Chaperonin TCP-1, conserved site;DDRGK domain containing protein;GroEL-like apical domain superfamily;GroEL-like equatorial domain superfamily;T-complex protein 1, delta subunit;TCP-1-like chaperonin intermediate domain superfamily;Winged helix DNA-binding domain superfamily;Winged hel…
A0A0P0W7R6.1	Homologous	114	511.42	45.9342	42.2803	A0A0P0VZC8.1(45.2);A0A0P0VBW5.1(39.9);	Os04g0266700 protein			A0A0P0XVD7.1(106.7);Q6K937.1(84.6);Q7XM95.1(74.7);Q10RY0.1(72.3);Q6K8E9.1(69.4);A0A0P0Y7Y6.1(62.3);A0A0P0V5S3.1(26.4);A0A0P0W5W4.1(20.4);	Casparian strip membrane protein domain;VWA-Hint protein, Vwaint domain;Zinc finger, C3HC4 RING-type;Zinc finger, RING-type;Zinc finger, RING/FYVE/PHD-type;von Willebrand factor A-like domain superfamily;von Willebrand factor, type A;
A0A0P0XQZ0.1	Single-copy	78	46.9266	91.9962	42.2441		Os10g0103622 protein			Q84NR4.2(19.9);Q10MQ8.1(17.2);Q7XZH5.1(14.8);	NAD(P)-binding domain superfamily;Short-chain dehydrogenase/reductase SDR;
Q69SK0.1	Single-copy	117	50.3473	86.3222	42.1142		Os02g0802900 protein			Q69SJ7.1(56.4);Q7XDZ9.1(12.4);	CRAL-TRIO lipid binding domain;CRAL-TRIO lipid binding domain superfamily;GDAP2, macro domain;Macro domain;Ribosomal protein S15;Ribosomal protein S15, bacterial-type;S15/NS1, RNA-binding;
A0A0P0WST2.1	Single-copy	86	44.5275	98.4058	42.0709		Os06g0169800 protein			Q0J7T6.2(13.3);Q6K3N8.1(12.8);Q6KAC3.1(11.1);	Glycosyl transferase, family 8;Nucleotide-diphospho-sugar transferases;Plant galacturonosyltransferase GAUT;RNA polymerase sigma factor, region 2;RNA polymerase sigma factor, region 3/4-like;RNA polymerase sigma-70;RNA polymerase sigma-70 like domain;RNA polymerase sigma-70 region 2;RNA polymerase sigma-70 region 3;RNA polymerase sigma-70 region 4;Seven-in-absentia protein, TRAF-like domain;TRAF-…
A0A0P0X3I0.1	Single-copy	83	44.6214	97.9434	42.0498		Os07g0186100 protein			Q6K2P5.1(15.4);Q7XNY2.2(13.6);Q2QQE3.1(13.5);	DYW domain;F-box domain;F-box-like domain superfamily;FBD domain;Leucine-rich repeat domain superfamily;Pentatricopeptide repeat;Peptidyl-tRNA hydrolase II domain superfamily;Peptidyl-tRNA hydrolase, PTH2;Putative peptidyl-tRNA hydrolase PTRHD1;Tetratricopeptide-like helical domain superfamily;
A0A0P0X2Q1.1	Homologous	52	45.9605	93.6962	42.03	A0A0N7KU49.1(31.0);	Os07g0159200 protein			A0A0P0XKN7.1(37.7);	Harbinger transposase-derived nuclease domain;Myb/SANT-like domain;
Q10PT0.1	Single-copy	108	103.092	66.2333	41.9513		Expressed protein	DnaJ domain;Chaperone J-domain superfamily;		Q2QX63.1(20.4);P0DO01.1(19.6);P0DO02.1(19.6);P0DO03.1(19.6);Q94CX1.1(19.6);Q6Z6Z5.1(18.4);Q5JNF3.1(17.7);	3Fe-4S ferredoxin;4Fe-4S ferredoxin-type, iron-sulphur binding domain;Chaperone DnaJ;Chaperone DnaJ, C-terminal;Chaperone J-domain superfamily;DnaJ domain;DnaJ domain, conserved site;HSP40/DnaJ peptide-binding;Heat shock protein DnaJ, cysteine-rich domain;Heat shock protein DnaJ, cysteine-rich domain superfamily;Thylakoid lumenal 17.9kDa protein;
Q338X5.1	Homologous	113	185.633	57.6788	41.9177	A3BQY7.1(199.2);	Os10g0380300 protein	Protein of unknown function DUF3475;		Q65XG5.1(77.7);Q10AB4.1(49.8);Q5Z9P3.1(38.0);Q5TKI6.1(29.8);Q7XUZ4.2(27.1);	Protein of unknown function DUF3475;Protein of unknown function DUF668;
Q2RB28.1	Homologous	105	319.471	51.0657	41.8041	B9GBM3.1(203.8);Q0J5F8.2(81.0);Q6ER22.1(70.7);	Mini zinc finger protein 1	ZF-HD homeobox protein, Cys/His-rich dimerisation domain;		Q688U3.1(99.0);Q6YXH5.1(95.5);Q6ZB90.1(91.4);Q2QW44.3(88.6);Q8S3Q9.1(86.3);Q6Z528.1(84.5);Q53N87.2(82.3);Q6ER21.2(79.4);Q5VM82.1(74.9);Q10DV5.1(65.0);	Homeobox domain;Homeobox-like domain superfamily;Homeodomain, ZF-HD class;ZF-HD homeobox protein, Cys/His-rich dimerisation domain;
A0A0P0XKD3.1	Single-copy	145	166.179	59.0332	41.605		Os09g0330901 protein			Q0J2H4.1(45.6);A0A0P0XLX5.1(36.8);Q6EPK9.1(27.1);B7F8U7.1(21.7);Q0J5U5.1(18.7);A0A0P0XKR2.1(17.7);A0A0P0X6A0.1(16.8);A0A0P0XLJ7.1(14.3);	Ankyrin repeat;Ankyrin repeat-containing domain;Ankyrin repeat-containing domain superfamily;PGG domain;
A0A0P0W1D0.1	Single-copy	75	44.4752	96.4053	41.5143		Os03g0676200 protein			B7ECR1.1(16.6);Q69WE5.1(15.3);Q5JKW5.1(13.9);	Cilia- and flagella-associated protein 298;Malic enzyme, N-terminal domain;Malic enzyme, N-terminal domain superfamily;Malic enzyme, NAD-binding;Malic enzyme, conserved site;Malic oxidoreductase;NAD(P)-binding domain superfamily;Pyruvate kinase;Pyruvate kinase, C-terminal;Pyruvate kinase, C-terminal domain superfamily;Pyruvate kinase, active site;Pyruvate kinase, barrel;Pyruvate kinase, insert do…
C7J505.1	Single-copy	89	41.681	116.785	41.2972		Os07g0187001 protein			Q7X9A8.1(15.4);Q8GSY5.1(15.0);Q94GX4.1(14.2);	Basic leucine-zipper, C-terminal;Basic-leucine zipper domain;Isopenicillin N synthase-like;Non-haem dioxygenase N-terminal domain;Oxoglutarate/iron-dependent dioxygenase;Protein of unknown function DUF241, plant;
A0A0P0WLF3.1	Single-copy	128	456.798	46.8945	41.2275		Os05g0366200 protein	Glycoside hydrolase family 1;Glycoside hydrolase superfamily;		Q6L597.2(90.8);Q60DX8.1(90.3);Q5JK35.1(89.5);B7F8N7.1(87.5);Q8RZL1.2(77.8);B7F7K7.1(76.4);Q0J0G2.2(61.9);Q5N863.1(60.7);Q7XSK2.2(59.0);Q7XPY5.2(57.9);	Glycoside hydrolase family 1;Glycoside hydrolase superfamily;Glycoside hydrolase, family 1, beta-glucosidase;Glycosyl hydrolases family 1, N-terminal conserved site;
Q6YTW2.1	Single-copy	71	195.068	56.8113	41.1605		PRA1 family protein	Prenylated rab acceptor PRA1;		A0A0P0W2T6.1(106.6);Q65WW5.1(43.2);Q2QYS7.1(41.2);Q2RBL4.1(40.4);B7FAB9.1(40.0);Q7Y1J0.1(38.7);Q6L4R1.1(36.2);	Prenylated rab acceptor PRA1;
A0A0P0WN08.1	Single-copy	121	144.074	60.8347	41.1571		Os05g0443400 protein			Q5N7B6.1(57.1);Q7XVG8.2(43.5);Q6ESE5.1(35.5);Q0DEW3.1(23.5);Q53K23.1(23.3);Q33AW5.1(23.3);Q6Z7A0.1(21.7);	Glycoside hydrolase family 17;Glycoside hydrolase superfamily;
A0A0P0XPD8.1	Single-copy	98	564.003	44.5663	41.1008		Os09g0478000 protein			Q0DXZ1.1(107.3);Q69P51.1(50.8);Q9AV71.1(48.2);Q6YVM4.1(47.9);Q851L8.1(47.9);Q5JN63.1(45.6);Q7EZW6.2(42.7);Q69V23.1(42.4);	Cellulose synthase;Cellulose synthase, RING-type zinc finger;Nucleotide-diphospho-sugar transferases;Zinc finger, RING-type;Zinc finger, RING/FYVE/PHD-type;
A0A0N7KL06.1	Single-copy	99	41.0461	168.498	41.0439		Os05g0493166 protein			Q10R45.1(14.3);Q75GB1.1(13.9);Q6H6S3.1(10.4);Q0INZ4.2(10.3);	AUX/IAA domain;AUX/IAA protein;Aminotransferase class-III;Helix-turn-helix motif;Homeobox domain;Homeobox, conserved site;Homeobox-like domain superfamily;Isoprenoid synthase domain superfamily;Leucine zipper, homeobox-associated;PB1 domain;Polyprenyl synthetase;Polyprenyl synthetase, conserved site;Pyridoxal phosphate-dependent transferase;Pyridoxal phosphate-dependent transferase domain 1;Pyrid…
A0A0N7KKK1.1	Single-copy	83	216.019	55.4687	40.9398		Os05g0333150 protein			A0A0P0WL17.1(58.8);A0A0P0VQL0.1(40.6);A0A0P0VQN5.1(29.0);Q5JK80.1(24.6);A0A0N7KEH6.1(24.0);Q6ZIY2.1(20.2);A0A0P0WVJ8.1(20.0);Q6ZL19.1(18.7);Q84M37.1(18.4);	Neprosin;Neprosin activation peptide;
A0A0P0XZA6.1	Single-copy	40	49.9239	85.0825	40.8778		Os11g0152600 protein			Q6H6S3.1(13.2);Q6ZA74.1(13.1);B9FN31.1(12.5);	Helix-turn-helix motif;Homeobox domain;Homeobox, conserved site;Homeobox-like domain superfamily;Leucine zipper, homeobox-associated;Protein of unknown function DUF3123;
A0A0P0UZN0.1	Single-copy	102	375.092	48.8775	40.4767		Peptidase A1 domain-containing protein	Aspartic peptidase A1 family;Peptidase family A1 domain;Aspartic peptidase domain superfamily;Xylanase inhibitor, C-terminal;		Q6ZC29.1(55.7);A0A0P0X779.1(52.8);Q8LNM6.1(52.0);Q69IP6.1(51.3);Q6I5E1.1(50.8);Q0D5V1.1(50.0);Q8LNN1.1(49.8);Q8LNM7.1(49.7);A0A0P0XX90.1(49.5);Q6Z6Q8.1(49.4);	Aspartic peptidase A1 family;Aspartic peptidase domain superfamily;Aspartic peptidase, active site;CND41-like;Pepsin-like domain, plant;Peptidase family A1 domain;Xylanase inhibitor, C-terminal;Xylanase inhibitor, N-terminal;
Q0DC35.2	Single-copy	102	99.6033	66.1931	40.4351		rRNA adenine N(6)-methyltransferase	Ribosomal RNA adenine methyltransferase KsgA/Erm;S-adenosyl-L-methionine-dependent methyltransferase;		Q0JC08.1(16.6);Q10MG9.1(16.4);A0A0P0X811.1(16.1);Q10SL2.1(15.8);A0A0P0X5W0.1(15.6);A0A0P0V430.1(14.9);	AAA ATPase, AAA+ lid domain;AAA+ ATPase domain;ATPase, AAA-type, conserved site;ATPase, AAA-type, core;GAF domain;GAF-like domain superfamily;Histidine kinase domain;Histidine kinase/HSP90-like ATPase;Histidine kinase/HSP90-like ATPase superfamily;Leucine-rich repeat domain superfamily;Leucine-rich repeat-containing N-terminal, plant-type;Metalloenzyme, LuxS/M16 peptidase-like;Oxoglutarate/iron-d…
Q0IP37.1	Homologous	132	110.259	64.5288	40.4136	A0A0P0WW67.1(77.9);A0A0N7KHP0.1(73.7);A3BBW7.1(71.3);A0A0P0Y933.1(50.5);	Os12g0256900 protein	Pentatricopeptide repeat;Tetratricopeptide-like helical domain superfamily;		Q6ZA49.1(116.8);	DYW domain;Pentatricopeptide repeat;Tetratricopeptide-like helical domain superfamily;
A0A0P0XHC2.1	Homologous	95	961.057	38.7379	40.4018	Q0D5R0.1(41.9);A0A0P0VGE0.1(36.7);	Protein kinase domain-containing protein			Q6YUZ6.1(119.6);A0A0P0X732.1(117.2);Q0D5R3.1(115.3);Q53KU9.1(115.0);Q7XHL0.1(114.1);A0A0P0XHX6.1(113.8);A0A0P0XHR4.1(112.6);Q0D5T4.1(112.4);	EGF-like calcium-binding domain;EGF-like calcium-binding, conserved site;EGF-like domain;EGF-type aspartate/asparagine hydroxylation site;Gnk2-homologous domain;Gnk2-homologous domain superfamily;Leucine-rich repeat;Leucine-rich repeat domain superfamily;Leucine-rich repeat, typical subtype;Leucine-rich repeat-containing N-terminal, plant-type;Protein kinase domain;Protein kinase, ATP binding sit…
A0A0P0WD45.1	Homologous	123	42.3564	98.8886	40.124	A0A0N7KDA4.1(43.6);	Os04g0546550 protein			Q67W58.1(15.3);A0A0P0YBU6.1(13.6);	PB1 domain;Protein kinase domain;Protein kinase, ATP binding site;Protein kinase-like domain superfamily;Serine-threonine/tyrosine-protein kinase, catalytic domain;Serine/threonine-protein kinase, active site;
C7J639.1	Single-copy	84	45.2651	90.4679	40.0878		Os08g0506350 protein			Q6AWY6.2(17.1);Q10L10.1(13.4);A0A0P0WUZ0.1(11.9);	Cytochrome P450;Cytochrome P450 superfamily;Cytochrome P450, E-class, group I;Cytochrome P450, conserved site;Ferritin-like superfamily;Glutamine-Leucine-Glutamine, QLQ;Growth-regulating factor;Protein of unknown function DUF455;WRC domain;
A0A0N7KJG5.1	Homologous	125	407.456	47.8392	40.0593	A0A0P0X6H7.1(30.5);	Rx_N domain-containing protein	Virus X resistance protein-like, coiled-coil domain;Rx, N-terminal;		Q84YX3.1(66.0);Q0ITC8.1(64.4);Q5VP50.1(59.6);A0A0P0VZG5.1(52.3);Q5VN81.1(50.9);A0A0P0X0V5.1(50.8);C7J3D2.1(48.7);A0A0P0WXD3.1(46.5);Q2QZF1.1(46.3);	Leucine-rich repeat domain superfamily;NB-ARC;P-loop containing nucleoside triphosphate hydrolase;Rx, N-terminal;Virus X resistance protein-like, coiled-coil domain;
A0A0P0WZR8.1	Homologous	144	151.636	59.7201	39.9524	A0A0P0X7C1.1(60.7);A0A0P0VLE0.1(54.1);	Os06g0660650 protein			A0A0P0XH65.1(76.8);A0A0P0X8A8.1(62.2);Q6YYW9.1(61.5);Q2R3L6.1(61.0);Q5Z5G1.1(61.0);Q7F0Z6.1(60.2);Q0JEE5.1(59.7);	Myb-like domain;No apical meristem-associated, C-terminal domain;
A0A0P0VCM1.1	Single-copy	127	125.246	62.4094	39.9347		NPH3 domain-containing protein			Q8H069.1(27.7);Q2QN08.1(25.6);Q10Q87.1(24.2);Q69P69.1(24.1);Q10EK0.1(24.0);	BTB/POZ domain;BTB/POZ domain-containing protein NPY1;NPH3 domain;SKP1/BTB/POZ domain superfamily;
A0A0P0V2A1.1	Single-copy	88	43.9759	92.6432	39.8368		Os01g0330650 protein			Q5VRR5.1(13.1);A0A0P0V0T6.1(12.9);A0A0P0W0G4.1(12.5);	Armadillo-type fold;F-box domain;F-box-like domain superfamily;Leucine-rich repeat domain superfamily;Leucine-rich repeat, cysteine-containing subtype;NB-ARC;P-loop containing nucleoside triphosphate hydrolase;Quinoprotein alcohol dehydrogenase-like superfamily;Rx, N-terminal;U box domain;WD40 repeat;Zinc finger, RING/FYVE/PHD-type;
A0A0N7KG84.1	Homologous	89	45.0328	90.2404	39.7774	A0A0P0YB72.1(152.2);	Os02g0789500 protein			Q8H7R6.1(15.2);A0A0P0X4L9.1(15.1);Q7XEK8.1(13.0);	Cytochrome P450;Cytochrome P450 superfamily;Protein kinase domain;Protein kinase, ATP binding site;Protein kinase-like domain superfamily;Protein of unknown function PDDEXK-like;Serine-threonine/tyrosine-protein kinase, catalytic domain;Serine/threonine-protein kinase, active site;Wall-associated receptor kinase, galacturonan-binding domain;
C7J6S1.1	Single-copy	127	394.969	48.1047	39.7713		Os09g0474400 protein	Pentatricopeptide repeat;Tetratricopeptide-like helical domain superfamily;		Q8H8N2.1(116.6);Q6ZIP5.1(109.4);Q9LHZ4.1(108.4);Q6K2P5.1(107.3);	DYW domain;Pentatricopeptide repeat;Tetratricopeptide-like helical domain superfamily;
Q0JPI2.1	Single-copy	139	42.9214	95.3532	39.7702		Os01g0221500 protein	Protein of unknown function DUF2358;		Q0DJX6.1(78.2);Q7XLD2.2(40.4);A0A0P0X1F1.1(17.9);	ARID DNA-binding domain;ARID DNA-binding domain superfamily;JmjC domain;JmjN domain;Lysine-specific demethylase-like domain;NTF2-like domain superfamily;Protein of unknown function DUF2358;Zinc finger, C5HC2-type;Zinc finger, FYVE/PHD-type;Zinc finger, PHD-finger;Zinc finger, PHD-type;Zinc finger, PHD-type, conserved site;
Q6ZC87.1	Single-copy	93	121.693	62.7677	39.7549		Os08g0337900 protein	FHY3/FAR1 family;		Q6AT58.1(73.0);Q53LV0.1(20.0);Q7XDH8.2(17.7);Q10MR7.1(15.0);A0A0P0WTT4.1(15.0);	Atypical dual-specificity phosphatase Siw14-like;Atypical dual-specificity phosphatase Siw14-like, plant and fungi;Cyclin-dependent kinase inhibitor;FAR1 DNA binding domain;FHY3/FAR1 family;MULE transposase domain;Protein of unknown function DUF4228, plant;Protein-tyrosine phosphatase-like;The fantastic four family;Zinc finger, PMZ-type;Zinc finger, SWIM-type;
A0A0P0X0M5.1	Single-copy	77	42.2066	97.0727	39.5668		Os06g0707766 protein			Q7XJ08.1(15.1);Q8RYF9.1(13.6);Q8S7U4.1(11.7);	At1g76070-like;Chaperone J-domain superfamily;DnaJ domain;DnaJ domain, conserved site;Domain of unknown function DUF3444;Protein of unknown function DUF3110;
A0A0N7KMV3.1	Single-copy	110	73.1253	71.5982	39.4781		Os07g0121625 protein			Q0D8W9.1(57.4);Q8LHX2.1(16.0);Q7XIE6.1(15.3);	Protein of unknown function DUF1719;
A0A0P0XK09.1	Single-copy	127	100.195	65.6575	39.3879		Os09g0309900 protein			Q5JLD2.1(81.3);Q10M00.2(33.9);Q10LZ9.1(23.6);Q0D3J9.1(23.2);	AtC3H46-like, RNA recognition motif;Nucleotide-binding alpha-beta plait domain superfamily;Protein XRI1;RNA recognition motif domain;RNA-binding domain superfamily;Zinc finger, CCCH-type;Zinc finger, CCCH-type superfamily;
Q9AUP1.1	Single-copy	104	553.935	44.3	39.3816		Os10g0361200 protein	FAD-binding, type PCMH-like superfamily;		Q0DBM6.1(99.4);Q5Z956.1(99.0);Q5Z7I1.1(94.9);Q5Z957.1(92.4);A0A0P0VGV3.1(89.2);Q84PV7.1(83.3);Q84PV5.1(81.0);Q84PV6.1(72.6);	Berberine/berberine-like;FAD linked oxidase, N-terminal;FAD-binding domain, PCMH-type;FAD-binding, type PCMH, subdomain 1;FAD-binding, type PCMH-like superfamily;Oxygen oxidoreductase covalent FAD-binding site;
A0A0P0XDA9.1	Homologous	128	58.8106	77.05	39.3617	A0A0P0XD20.1(255.4);	Os08g0217800 protein			A0A0P0WQ76.1(103.6);Q6Z5Z5.1(13.1);	Osmotin/thaumatin-like superfamily;Protein of unknown function DUF247, plant;Thaumatin family;
A0A0N7KS49.1	Homologous	76	579.067	43.8079	39.3257	A0A0P0VD47.1(42.6);A0A0P0V2A4.1(40.8);Q0JN60.1(38.0);A0A0N7KQK4.1(30.8);	PEROXIDASE_4 domain-containing protein	Haem peroxidase;Haem peroxidase superfamily;Plant peroxidase;		Q6K2D3.1(99.9);Q654S1.1(98.4);Q5U1S8.1(95.0);Q9AS12.1(95.0);Q94DM2.1(93.1);Q75IS1.1(87.3);Q5JMS4.1(85.2);Q8W2X2.1(83.9);Q8LMR6.1(83.2);	Haem peroxidase;Haem peroxidase superfamily;Peroxidase, active site;Peroxidases heam-ligand binding site;Plant peroxidase;Secretory peroxidase;Twin-arginine translocation pathway, signal sequence;
Q0DEJ9.1	Single-copy	81	84.1085	68.6927	39.3093		Os06g0148500 protein	F-box-like domain superfamily;		Q5VPK0.1(59.8);Q2QMZ3.1(41.2);	Domain unknown function DUF295;F-box domain;F-box-like domain superfamily;
A0A0P0XHT2.1	Single-copy	87	40.654	103.332	39.2535		Os08g0505400 protein			Q69TV8.1(16.1);Q6ES34.1(12.6);	Protein of unknown function DUF1666;Xyloglucan fucosyltransferase;
A0A0P0WCQ7.1	Single-copy	109	48.2057	84.7798	39.2523		GCFC domain-containing protein	GC-rich sequence DNA-binding factor-like domain;		Q2QM64.1(19.5);P30298.2(16.7);	G-patch domain;GC-rich sequence DNA-binding factor-like domain;Glycosyl transferase, family 1;Septin and tuftelin interacting protein;Sucrose synthase;Sucrose synthase, plant/cyanobacteria;Tuftelin interacting protein, N-terminal domain;
A0A0P0W9S3.1	Single-copy	114	52.9351	80.537	39.2506		Os04g0387000 protein			Q10LA2.1(22.0);Q6ZCS9.1(20.0);A0A0P0Y6Z9.1(18.7);Q69TI8.1(18.0);B9F1N5.1(17.4);Q6H533.1(17.4);	Exocyst complex component Exo70;G-protein beta WD-40 repeat;Glycosyl transferase, family 31;PRP4-like superfamily;Pre-mRNA processing factor 4 (PRP4)-like;Protein of unknown function DUF761, plant;Protein of unknown function DUF868, plant;WD40 repeat;WD40 repeat, conserved site;WD40-repeat-containing domain;WD40-repeat-containing domain superfamily;WD40/YVTN repeat-like-containing domain superfam…
A0A0P0Y993.1	Single-copy	91	42.3697	94.8209	39.102		Os12g0289900 protein			Q2QYY8.2(15.0);Q2RBR1.2(13.0);	PAC motif;PAS domain;PAS domain superfamily;PAS-associated, C-terminal;Protein kinase domain;Protein kinase, ATP binding site;Protein kinase-like domain superfamily;Serine/threonine-protein kinase, active site;
A0A0P0V3Q2.1	Single-copy	29	39.1133	138.634	39.0725		Os01g0540000 protein			Q8S1V1.1(11.8);Q6YV37.1(11.0);	AAA+ ATPase domain;ATPase family AAA domain-containing protein 3;ATPase family AAA domain-containing protein 3, domain of unknown function DUF3523;ATPase, AAA-type, conserved site;ATPase, AAA-type, core;Aspartic peptidase A1 family;Aspartic peptidase domain superfamily;P-loop containing nucleoside triphosphate hydrolase;Peptidase family A1 domain;Xylanase inhibitor I-like;Xylanase inhibitor, C-te…
A0A0P0UZM5.1	Single-copy	95	264.018	52.4716	38.9925		RING-type domain-containing protein	CCR4-NOT transcription complex subunit 4;NOT4, modified RING finger, HC subclass (C4C4-type);Zinc finger, RING-type;Zinc finger, RING/FYVE/PHD-type;		Q2QYY3.2(102.2);Q7XUS4.2(36.8);Q10LI1.1(19.7);Q6ERQ9.1(14.4);Q8W3F9.1(14.0);Q6H792.1(13.9);Q9LHZ7.1(13.5);Q6L4Y0.1(12.9);	CCR4-NOT transcription complex subunit 4;CNOT4, RNA recognition motif;Cellulose synthase;E3 ubiquitin ligase RBR family;Helicase superfamily 1/2, ATP-binding domain;Helicase, C-terminal;IBR domain;NOT4, modified RING finger, HC subclass (C4C4-type);Nucleotide-binding alpha-beta plait domain superfamily;Nucleotide-diphospho-sugar transferases;P-loop containing nucleoside triphosphate hydrolase;Pro…
A0A0P0XFP6.1	Single-copy	61	401.781	47.6885	38.9679		Os08g0410950 protein			A0A0P0VHA9.1(96.9);A0A0P0VAC7.1(43.7);Q0DZN8.1(41.0);Q2QXD6.1(39.6);Q5VRR4.1(36.7);Q2QVL7.2(36.1);Q7XKT7.2(34.3);	FAR1 DNA binding domain;FHY3/FAR1 family;MULE transposase domain;Zinc finger, PMZ-type;Zinc finger, SWIM-type;
B9GBM3.1	Homologous	105	319.471	50.2571	38.9529	Q2RB28.1(203.7);Q0J5F8.2(78.2);Q6ER22.1(69.1);	Mini zinc finger protein 2	ZF-HD homeobox protein, Cys/His-rich dimerisation domain;		Q688U3.1(99.0);Q6YXH5.1(95.5);Q6ZB90.1(91.4);Q2QW44.3(88.6);Q8S3Q9.1(86.3);Q6Z528.1(84.5);Q53N87.2(82.3);Q6ER21.2(79.4);Q5VM82.1(74.9);Q10DV5.1(65.0);	Homeobox domain;Homeobox-like domain superfamily;Homeodomain, ZF-HD class;ZF-HD homeobox protein, Cys/His-rich dimerisation domain;
A0A0P0YAR5.1	Single-copy	95	40.9983	99.3695	38.9337		Os12g0527301 protein			Q6K602.1(13.3);Q5Z9X4.1(12.8);Q7XPK1.1(12.4);	DEAD/DEAH box helicase domain;DNA/RNA helicase, ATP-dependent, DEAH-box type, conserved site;Domain of unknown function DUF1605;Helicase superfamily 1/2, ATP-binding domain;Helicase, C-terminal;Helicase-associated domain;K Homology domain;K Homology domain, type 1;K Homology domain, type 1 superfamily;Nucleic acid-binding, OB-fold;P-loop containing nucleoside triphosphate hydrolase;RNA-binding do…
Q0DSU5.1	Single-copy	131	182.323	56.958	38.9186		DUF4378 domain-containing protein			A0A0P0VWP6.1(84.3);B9FM60.1(60.9);Q2QNC7.1(14.5);	DUF3741-associated sequence motif;Domain of unknown function DUF3741;Domain of unknown function DUF4378;
A0A0N7KQK5.1	Single-copy	117	204.123	55.541	38.9128		Os09g0325000 protein			A0A0P0XII1.1(79.4);Q8S5X8.1(32.3);Q10QT7.1(32.3);Q84VG3.1(32.0);Q5NBQ2.1(31.3);	Leucine-rich repeat;Leucine-rich repeat domain superfamily;Leucine-rich repeat, typical subtype;Leucine-rich repeat-containing N-terminal, plant-type;LysM domain;Protein kinase domain;Protein kinase, ATP binding site;Protein kinase-like domain superfamily;Serine-threonine/tyrosine-protein kinase, catalytic domain;Serine/threonine-protein kinase, active site;Tyrosine-protein kinase, active site;
A0A0P0VCZ7.1	Single-copy	81	423.403	47.0926	38.9077		Os01g0956400 protein	Glycosyltransferase 61;		Q5VNI5.1(46.0);Q8GRV4.1(43.8);Q7XPB0.2(38.3);Q60ES7.1(38.1);Q9FTE0.1(38.0);Q6YWE6.1(35.2);A0A0P0WVV1.1(34.8);Q9FTE2.1(34.4);A0A0P0UXB1.1(33.5);A0A0P0UXI8.1(33.4);	Glycosyltransferase 61;
A0A0P0V2S1.1	Homologous	125	271.087	52.1352	38.9022	A0A0P0X1D6.1(56.7);	PEROXIDASE_4 domain-containing protein			Q7XIX1.1(119.9);Q7F1U0.1(119.1);Q10ET8.1(118.9);Q0D3N0.1(118.1);Q5Z9B2.1(117.6);Q6ER51.1(117.5);Q5JMS4.1(116.2);Q67VC4.1(115.1);Q6AVZ8.1(114.4);	Haem peroxidase;Haem peroxidase superfamily;Peroxidase, active site;Peroxidases heam-ligand binding site;Plant peroxidase;Secretory peroxidase;Twin-arginine translocation pathway, signal sequence;
A0A0P0YCU3.1	Single-copy	106	39.0466	123.415	38.8605		Os12g0600301 protein			Q5VP75.1(18.9);Q8RZE0.1(14.8);Q5NB81.1(12.2);Q6Z414.1(10.4);	Glycoside hydrolase superfamily;Glycoside hydrolase, family 14;Homeobox-like domain superfamily;Myb domain;Myb-like transcription factor;Nucleic acid-binding, OB-fold;Primosome PriB/single-strand DNA-binding;Protein MIZU-KUSSEI 1-like, plant;SANT/Myb domain;Single-stranded DNA-binding protein;
Q6AU08.1	Single-copy	116	64.4327	74.1776	38.8495		Expressed protein			Q5QNE1.1(18.3);Q7XGT7.1(14.6);A0A0P0VZ57.1(14.0);Q7XLD2.2(13.2);	AAA+ ATPase domain;ABC transporter type 1, transmembrane domain;ABC transporter type 1, transmembrane domain superfamily;ABC transporter, conserved site;ABC transporter-like;DNA2/NAM7 helicase, AAA domain;DNA2/NAM7 helicase-like, AAA domain;MFS transporter superfamily;NTF2-like domain superfamily;P-loop containing nucleoside triphosphate hydrolase;Protein of unknown function DUF2358;Proton-depend…
A0A0P0X273.1	Single-copy	87	42.2139	94.3586	38.8166		Os07g0136775 protein			Q6F2Z0.1(17.3);Q6YXT5.1(16.8);Q5U1F6.1(15.7);	D-arabinono-1,4-lactone oxidase;FAD linked oxidase, N-terminal;FAD-binding domain, PCMH-type;FAD-binding, type PCMH, subdomain 2;FAD-binding, type PCMH-like superfamily;Haem peroxidase;Haem peroxidase superfamily;L-gulonolactone oxidase, plant;Peptidyl-tRNA hydrolase II domain superfamily;Peptidyl-tRNA hydrolase, PTH2;Peroxidases heam-ligand binding site;Plant peroxidase;Secretory peroxidase;
A0A0P0V8S2.1	Single-copy	115	43.0793	91.86	38.7277		Os01g0769366 protein			Q53PH9.1(16.8);Q8LRG9.1(13.6);Q10L09.1(13.3);	ATP-dependent RNA helicase Ski2, C-terminal;ATP-dependent RNA helicase Ski2-like;Armadillo-type fold;DEAD/DEAH box helicase domain;Helicase superfamily 1/2, ATP-binding domain;Helicase, C-terminal;Histone-fold;P-loop containing nucleoside triphosphate hydrolase;Putative zinc- or iron-chelating domain containing protein;TAF6, C-terminal HEAT repeat domain;TATA box binding protein associated factor…
A0A0P0V114.1	Single-copy	103	52.5496	80.1709	38.5927		Os01g0272850 protein			Q8S1W2.1(16.8);Q7XRF1.2(12.3);Q6K241.1(12.1);B7F9F7.1(11.9);Q6ASR0.1(11.7);	Aldolase-type TIM barrel;Elp3/MiaB/NifB;L21-like superfamily;Leucine-rich repeat;Leucine-rich repeat domain superfamily;Leucine-rich repeat, typical subtype;Lipoyl synthase;Lipoyl synthase, N-terminal;Lipoyl synthase, mitochondrial;PDZ domain;PDZ superfamily;Peptidase S1, PA clan;Peptidase S1C;Protease Do-like, PDZ domain;Protein kinase domain;Protein kinase-like domain superfamily;Radical SAM;Ri…
A0A0P0W2R0.1	Homologous	70	652.727	42.32	38.5619	Q6F332.3(43.1);Q0JNL7.1(42.2);Q0JNS6.2(41.9);	Os03g0718700 protein	EF-hand domain pair;EF-Hand 1, calcium-binding site;EF-hand domain;		B9FKW9.1(107.8);Q6F3A6.1(102.4);Q5VQQ5.1(101.4);A2ZVI7.1(100.9);Q6I5I8.1(98.4);Q6I587.1(98.3);	EF-Hand 1, calcium-binding site;EF-hand domain;EF-hand domain pair;Protein kinase domain;Protein kinase, ATP binding site;Protein kinase-like domain superfamily;Serine/threonine-protein kinase, active site;
Q337Z8.1	Homologous	105	68.0494	72.6752	38.5489	Q10RG2.1(146.1);A0A0N7KHS5.1(126.9);A0A0P0WPD5.1(109.4);Q94GP7.1(96.2);Q69K56.1(66.8);A0A0P0WPW4.1(58.5);	Expressed protein	Protein of unknown function DUF1677, plant;		Q5QN00.1(114.6);Q6H530.1(114.2);A0A0P0UZB5.1(96.7);A0A0P0WXZ6.1(90.8);Q84MQ2.1(89.6);	Protein of unknown function DUF1677, plant;
A0A0P0VNF2.1	Single-copy	109	49.1102	82.8743	38.4882		Os02g0703800 protein	F-box-like domain superfamily;		Q5VPK0.1(31.7);A0A0P0WCI3.1(31.6);	Domain unknown function DUF295;F-box domain;F-box-like domain superfamily;
A0A0P0XFU1.1	Single-copy	79	50.5688	81.5139	38.4204		Os08g0420133 protein			Q7XM21.2(17.8);Q7XDH8.2(17.5);Q5ZBW3.1(14.7);Q67V82.1(14.3);	Cyclin-dependent kinase inhibitor;Isopenicillin N synthase-like;Non-haem dioxygenase N-terminal domain;Oxoglutarate/iron-dependent dioxygenase;Protein LOW PSII ACCUMULATION 1-like;Protein of unknown function DUF4228, plant;Tetratricopeptide repeat;Tetratricopeptide repeat 1;Tetratricopeptide repeat-containing domain;Tetratricopeptide-like helical domain superfamily;
Q2R325.1	Single-copy	72	285.399	51.3889	38.4072		Expressed protein			A0A0P0YE31.1(88.4);Q2QLQ5.1(21.6);Q9ARQ7.1(19.1);Q6H5Y7.1(14.0);Q6K3W2.1(13.7);Q850Z8.1(12.8);Q5Z7H5.1(12.4);Q8GVW0.1(12.2);	Leucine rich repeat 4;Leucine-rich repeat;Leucine-rich repeat domain superfamily;Leucine-rich repeat, typical subtype;Leucine-rich repeat-containing N-terminal, plant-type;Phosphoribosylformylglycinamidine cyclo-ligase;Protein kinase domain;Protein kinase, ATP binding site;Protein kinase-like domain superfamily;PurM-like, C-terminal domain;PurM-like, C-terminal domain superfamily;PurM-like, N-ter…
Q8H604.1	Single-copy	126	40.4593	99.1444	38.3779		Os06g0180100 protein			Q10QD6.1(20.5);Q6EPA2.1(18.7);Q2R2M3.1(17.6);Q6ZI79.1(17.1);	LysM domain;LysM domain superfamily;Plastid division protein PDV1/PDV2;Protein kinase domain;Protein kinase-like domain superfamily;Protein maintenance of PSII under high light 1;Surfeit locus 1/Shy1;
A0A0P0V3A3.1	Single-copy	58	76.0349	70.1793	38.3583		OVATE domain-containing protein			Q5JN79.1(40.3);Q5W6T7.1(37.8);	DNA-binding domain, ovate family-like;Ovate protein family, C-terminal;Ovate protein family;
A0A0P0UZB6.1	Single-copy	108	46.739	85.1574	38.3218		Os01g0200350 protein			Q5N7A8.1(13.4);Q8RZE0.1(13.0);Q10AM8.1(12.6);A0A0P0VEB3.1(12.1);Q6H689.1(11.1);	Alternative oxidase;NTF2-like domain superfamily;Nuclear transport factor 2;Nuclear transport factor 2, eukaryote;Nucleotide-binding alpha-beta plait domain superfamily;Protein MIZU-KUSSEI 1-like, plant;Protein OCTOPUS-like;RNA recognition motif domain;RNA-binding domain superfamily;Ras GTPase-activating protein-binding protein;Uncharacterised conserved protein UCP012943;
Q2QVJ9.1	Single-copy	80	275.486	51.76	38.2801		Os12g0226600 protein	GroES-like superfamily;		Q2QVK7.2(70.8);Q2QVJ6.1(69.0);Q2QVJ8.1(64.5);Q2QVJ5.1(64.3);Q7XUK3.2(42.6);Q53LC7.1(37.6);Q8S0M7.1(21.7);	Alcohol dehydrogenase, C-terminal;GroES-like superfamily;NAD(P)-binding domain superfamily;Oxidoreductase, N-terminal domain;Polyketide synthase, enoylreductase domain;
A0A0N7KCY7.1	Single-copy	79	42.5818	91.3089	38.0625		Os01g0364450 protein			Q67W46.1(13.9);Q6YWE7.1(13.8);B9GBN8.1(13.4);	Glycosyl transferase, family 14;Homeobox domain;Homeobox-like domain superfamily;Mpv17/PMP22;Protein SAWADEE HOMEODOMAIN HOMOLOG 1/2;SAWADEE domain;
A0A0P0VJK5.1	Single-copy	104	395.734	47.5799	38.0066		Os02g0519401 protein			A0A0N7KG46.1(111.0);Q5N734.1(107.9);Q0JHC3.1(107.1);A0A0P0VB13.1(104.9);Q0JHC1.2(99.6);A0A0P0WML3.1(91.8);Q5N747.1(89.9);	MFS transporter superfamily;PTR2 family proton/oligopeptide symporter, conserved site;Proton-dependent oligopeptide transporter family;
A0A0P0XAK8.1	Single-copy	94	42.1577	91.8501	37.8954		Os07g0686700 protein			Q6YUW7.1(22.0);Q6ETC8.1(13.7);	RINT-1/Tip20;TMPIT-like;
A0A0N7KCF2.1	Homologous	107	60.811	75.0234	37.8857	A0A0N7KL76.1(203.1);	Os01g0173801 protein			Q653S8.1(34.3);Q6ZIV0.1(23.3);A0A0P0VRM1.1(13.4);	E3 ubiquitin ligase RBR family;IBR domain;Protein of unknown function DUF1677, Oryza sativa;Zinc finger, RING-type;Zinc finger, RING-type, conserved site;Zinc finger, RING/FYVE/PHD-type;Zinc finger, RanBP2-type;Zinc finger, RanBP2-type superfamily;
A0A0P0WYE9.1	Single-copy	87	38.4708	111.615	37.8805		Os06g0570400 protein			Q6Z414.1(13.3);A0A0P0X6S6.1(10.9);Q53LV0.1(10.8);	Gnk2-homologous domain;Gnk2-homologous domain superfamily;Homeobox-like domain superfamily;Myb domain;Myb-like transcription factor;Protein kinase domain;Protein kinase, ATP binding site;Protein kinase-like domain superfamily;SANT/Myb domain;Serine/threonine-protein kinase, active site;The fantastic four family;
Q0DBQ3.1	Single-copy	118	78.1983	69.3662	37.8605		Os06g0542100 protein			Q6ESU4.1(44.4);Q5QNG0.1(22.8);Q0E3X4.2(22.6);B9G2U1.1(19.2);Q69UJ1.1(14.7);Q7XQ70.1(13.4);	Ataxin-2, C-terminal;CID8-like protein, RNA recognition motif 1;CID8-like protein, RNA recognition motif 2;DEAD/DEAH box helicase domain;Helicase superfamily 1/2, ATP-binding domain;Helicase, C-terminal;Nucleotide-binding alpha-beta plait domain superfamily;P-loop containing nucleoside triphosphate hydrolase;RNA helicase, DEAD-box type, Q motif;RNA recognition motif domain;RNA-binding domain supe…
B9FP28.1	Single-copy	114	64.7202	73.4263	37.8503		RNase H domain-containing protein	Ribonuclease H domain;		B9FGQ2.1(72.7);A0A0P0WL91.1(72.2);	NAC domain;NAC domain superfamily;Ribonuclease H domain;Ribonuclease H superfamily;Ribonuclease H-like superfamily;
A0A0P0Y8I7.1	Single-copy	108	568.445	43.5964	37.8502		Os12g0240875 protein	Proton-dependent oligopeptide transporter family;		Q7XBS5.1(72.0);Q6YVW2.1(71.6);A0A0P0XQX3.1(68.8);Q7XBS8.1(66.3);Q6Z8E5.1(61.4);Q7XNU6.1(61.2);Q10S13.1(60.4);Q0JAI6.1(60.3);Q6ZGY3.1(59.9);Q6ZGW7.1(59.7);	MFS transporter superfamily;PTR2 family proton/oligopeptide symporter, conserved site;Proton-dependent oligopeptide transporter family;
Q0J0W3.1	Homologous	96	57.7866	76.3823	37.8128	Q6H735.1(34.9);	Os09g0480600 protein			Q5ZA41.1(19.8);Q6K2P4.1(15.0);Q9ASA0.1(12.0);Q0IZR1.1(10.0);	F-box domain;F-box-like domain superfamily;Galactose oxidase/kelch, beta-propeller;Kelch repeat type 1;Kelch-type beta propeller;Molybdate transporter 1/2;NAD(P)-binding domain superfamily;Short-chain dehydrogenase/reductase SDR;Tetrahydrofolate dehydrogenase/cyclohydrolase;Tetrahydrofolate dehydrogenase/cyclohydrolase, NAD(P)-binding domain;Tetrahydrofolate dehydrogenase/cyclohydrolase, catalyti…
A0A0P0W017.1	Single-copy	105	40.8611	94.7	37.6744		Os03g0439601 protein			Q656F1.1(15.6);B7E741.1(14.0);Q9AWT3.1(10.2);	Aspartic peptidase A1 family;Aspartic peptidase domain superfamily;Aspartic peptidase, active site;CND41-like;GPI mannosyltransferase;GPI mannosyltransferase 3;Peptidase family A1 domain;TMEM33/Pom33 family;Xylanase inhibitor, C-terminal;Xylanase inhibitor, N-terminal;
A0A0P0WJ47.1	Homologous	94	97.7184	65.3191	37.6284	Q5W6I8.1(41.6);	Os05g0205800 protein			Q94GL5.1(16.0);Q652L2.1(15.0);Q6Z8K2.1(14.3);A0A0P0V8W3.1(14.0);Q2QZH3.1(13.4);Q6ZIA3.1(12.9);	Conserved oligomeric Golgi complex subunit 1;Helix-turn-helix motif;Homeobox domain;Homeobox, conserved site;Homeobox-like domain superfamily;Leucine zipper, homeobox-associated;P-loop containing nucleoside triphosphate hydrolase;Phosphoribosyltransferase domain;Phosphoribosyltransferase-like;Phosphoribulokinase/uridine kinase;TUP1-like enhancer of split;The fantastic four family;Uridine kinase-l…
A0A0P0WU20.1	Single-copy	110	547.875	43.9164	37.5854		Os06g0213551 protein			Q6ZF89.1(71.2);Q84S11.1(71.1);Q6ZF86.1(57.4);Q84S18.1(48.2);Q84UP7.1(45.4);Q7XHV0.1(39.3);Q9LHZ7.1(28.4);Q8W3F9.1(27.9);Q2QNS6.1(24.9);Q7EZW6.2(24.9);	Cellulose synthase;Nucleotide-diphospho-sugar transferases;Zinc finger, RING/FYVE/PHD-type;
A0A0P0VHU9.1	Single-copy	138	38.3342	108.525	37.5375		Os02g0289700 protein			Q69UJ1.1(16.6);Q2QQX6.1(16.2);Q5Z480.1(12.0);	AUX/IAA domain;Ataxin-2, C-terminal;Auxin response factor;B3 DNA binding domain;CID8-like protein, RNA recognition motif 1;CID8-like protein, RNA recognition motif 2;DNA-binding pseudobarrel domain superfamily;Nucleotide-binding alpha-beta plait domain superfamily;PB1 domain;Protein SCAI;Protein SCAI, metazoan/viridiplantae;RNA recognition motif domain;RNA-binding domain superfamily;
A0A0N7KNK8.1	Single-copy	129	209.291	54.7612	37.4405		TAXi_N domain-containing protein	Aspartic peptidase A1 family;Aspartic peptidase domain superfamily;Xylanase inhibitor, N-terminal;		Q69IP6.1(35.3);Q69IP7.1(34.3);Q7XV21.2(34.0);Q67UZ9.1(32.9);A0A0P0VWR5.1(31.3);Q10M95.1(30.2);A0A0N7KH60.1(30.0);A0A0N7KS51.1(29.4);A0A0P0X779.1(28.5);A0A0N7KJX5.1(28.4);	Aspartic peptidase A1 family;Aspartic peptidase domain superfamily;Aspartic peptidase, active site;Pepsin-like domain, plant;Peptidase family A1 domain;Xylanase inhibitor, C-terminal;Xylanase inhibitor, N-terminal;
A0A0P0WY64.1	Single-copy	81	37.8892	113.598	37.411		Os06g0553001 protein			Q67V82.1(16.3);Q6EP57.1(15.7);Q2R2M3.1(15.5);	LysM domain;LysM domain superfamily;Oxygen-evolving enhancer protein 3;Protein kinase domain;Protein kinase-like domain superfamily;Protein of unknown function DUF4228, plant;PsbQ-like domain superfamily;
A0A0P0WEB7.1	Single-copy	105	83.7454	67.8476	37.3837		Os04g0601900 protein			Q7FAM5.1(54.7);Q651J5.1(15.2);	EXS, C-terminal;MORF/ORRM1/DAG-like;PHO1, SPX domain;SPX domain;
A0A0P0VGF1.1	Single-copy	136	87.297	67.0794	37.3195		Os02g0213700 protein			Q6K625.1(113.9);Q7XU86.3(80.0);	BTB/POZ domain;Potassium channel tetramerisation-type BTB domain;Quinoprotein alcohol dehydrogenase-like superfamily;SKP1/BTB/POZ domain superfamily;WD40/YVTN repeat-like-containing domain superfamily;
A0A0P0VEQ6.1	Homologous	89	709.796	41.0753	37.2834	Q53MU8.1(94.0);	Os02g0140500 protein	Terpenoid cyclases/protein prenyltransferase alpha-alpha toroid;		Q0IS49.1(120.0);Q0IT98.1(119.9);Q2R712.1(111.2);H2KWF1.1(103.3);Q6Z2X6.1(83.2);Q0J778.2(72.6);Q10NC7.1(12.5);	Oxysterol-binding protein;Oxysterol-binding protein superfamily;Oxysterol-binding protein, conserved site;Squalene cyclase;Squalene cyclase, C-terminal;Squalene cyclase, N-terminal;Terpene synthase, conserved site;Terpenoid cyclases/protein prenyltransferase alpha-alpha toroid;
A0A0P0VCB8.1	Single-copy	108	86.5836	67.1667	37.1995		Os01g0930950 protein			Q942W0.1(37.9);Q84JJ3.1(31.6);A0A0N7KIR0.1(29.3);Q10NH4.1(28.6);Q2R5F6.1(26.6);A0A0P0Y501.1(25.4);A0A0P0Y590.1(24.9);Q53KZ3.1(22.7);Q10NH7.1(22.6);	NAD(P)-binding domain superfamily;Short-chain dehydrogenase/reductase SDR;Short-chain dehydrogenase/reductase, conserved site;
A0A0P0UXE9.1	Single-copy	143	79.6265	68.6671	37.1639		Os01g0123500 protein			A0A0P0UXX3.1(83.7);A0A0P0WI27.1(26.5);A0A0P0WI58.1(26.1);A0A0P0UY32.1(25.6);Q9AWV2.1(18.3);Q10L91.1(16.3);Q7XAM5.1(15.9);Q6Z6Z3.1(15.2);A0A0P0UXN8.1(14.9);	Seven-in-absentia protein, TRAF-like domain;TRAF-like;Zinc finger, RING-type;Zinc finger, RING/FYVE/PHD-type;Zinc finger, SIAH-type;
A0A0N7KSZ8.1	Single-copy	141	47.3316	82.9553	37.1592		Os11g0520900 protein			Q6YTY3.1(21.0);Q6ZIU9.1(16.3);Q6ZF81.1(15.3);Q5Z645.1(13.3);A0A0P0X4X9.1(12.2);	Alfin;Ascorbate oxidase, first cupredoxin domain;Ascorbate oxidase, third cupredoxin domain;Cupredoxin;EF-Hand 1, calcium-binding site;EF-hand domain;EF-hand domain pair;L-ascorbate oxidase, plants;Multicopper oxidase, copper-binding site;Multicopper oxidase, type 1;Multicopper oxidase, type 2;Multicopper oxidase, type 3;Multicopper oxidases, conserved site;Protein kinase domain;Protein kinase, A…
Q6H584.1	Single-copy	118	64.7112	72.9432	37.083		Bzip-like transcription factor-like protein			Q68Y47.1(19.3);A0A0P0VGV3.1(13.6);Q10M67.1(12.9);Q8H612.1(12.1);	Berberine/berberine-like;Domain of unknown function DUF630;Domain of unknown function DUF632;FAD linked oxidase, N-terminal;FAD-binding domain, PCMH-type;FAD-binding, type PCMH, subdomain 1;FAD-binding, type PCMH-like superfamily;Nitrate regulatory gene2 protein;Oxygen oxidoreductase covalent FAD-binding site;Protein of unknown function DUF247, plant;Protein of unknown function DUF688;
A0A0P0XLV9.1	Homologous	77	90.6904	66.2688	36.9825	A0A0P0XMU8.1(76.0);A0A0P0XMD5.1(38.6);	Os09g0398701 protein			Q6AUC6.1(17.5);A0A0P0XS14.1(17.3);Q60DX8.1(13.5);A0A0P0Y411.1(13.0);Q7F8S3.1(12.2);Q5ZEM4.1(11.8);	Agenet domain, plant type;Agenet-like domain;ERV/ALR sulfhydryl oxidase domain;ERV/ALR sulfhydryl oxidase domain superfamily;Glycoside hydrolase family 1;Glycoside hydrolase superfamily;Glycosyl hydrolases family 1, N-terminal conserved site;Haem peroxidase;Haem peroxidase superfamily;Plant peroxidase;Protein of unknown function DUF4228, plant;Protein of unknown function DUF724;Secretory peroxida…
Q5N8L4.1	Single-copy	54	62.1553	73.813	36.9318		Os01g0696500 protein			Q6K8B0.1(14.0);Q0D724.1(13.5);Q0D8D4.2(13.5);	Carbon-nitrogen hydrolase;Carbon-nitrogen hydrolase superfamily;G-protein beta WD-40 repeat;Glutamine-dependent NAD(+) synthetase;Invertase/pectin methylesterase inhibitor domain superfamily;NAD(+) synthetase;NAD/GMP synthase;Pectin lyase fold;Pectin lyase fold/virulence factor;Pectinesterase inhibitor domain;Pectinesterase, Asp active site;Pectinesterase, Tyr active site;Pectinesterase, catalyti…
A0A0N7KM20.1	Single-copy	85	40.8853	92.2435	36.8955		Os06g0336150 protein			Q6YVY6.1(14.6);A0A0P0XS14.1(14.2);Q6ZFZ3.1(11.9);Q94JF1.1(10.5);	Ethylene-responsive binding factor-associated repression;Haem peroxidase;Haem peroxidase superfamily;Jas TPL-binding domain;Ninja family;Plant peroxidase;Protein MIZU-KUSSEI 1-like, plant;Protein plastid transcriptionally active 7;Putative nuclear localisation signal;Secretory peroxidase;
A0A0P0XXK7.1	Single-copy	142	46.8666	82.9838	36.8166		Os10g0561250 protein			Q653H7.1(16.1);Q2QN91.1(15.1);Q10L09.1(13.4);Q8H2T7.1(12.9);	Auxin response factor;B3 DNA binding domain;Concanavalin A-like lectin/glucanase domain superfamily;DNA-binding pseudobarrel domain superfamily;Legume lectin domain;Legume lectin, beta chain, Mn/Ca-binding site;NADH ubiquinone oxidoreductase, F subunit;NADH-ubiquinone oxidoreductase 51kDa subunit, FMN-binding domain;NADH-ubiquinone oxidoreductase 51kDa subunit, FMN-binding domain superfamily;NADH…
A0A0P0WIU8.1	Single-copy	82	42.4511	88.6207	36.7431		Os05g0195901 protein			C7IWJ0.1(21.3);Q5ZBW3.1(11.4);A0A0P0W0Z4.1(10.6);	Chloride channel, core;Chloride channel, voltage gated;E3 ubiquitin ligase RBR family;IBR domain;Protein LOW PSII ACCUMULATION 1-like;Tetratricopeptide repeat;Tetratricopeptide repeat 1;Tetratricopeptide repeat-containing domain;Tetratricopeptide-like helical domain superfamily;Zinc finger, RING-type;Zinc finger, RING/FYVE/PHD-type;
A0A0P0Y812.1	Homologous	119	37.3989	106.656	36.4658	A0A0P0XE18.1(116.9);	Os12g0171900 protein			Q5VML3.1(14.2);Q7XUV4.2(13.6);A0A0P0W7X0.1(12.5);Q2QWV0.1(12.0);	Chloramphenicol acetyltransferase-like domain superfamily;DYW domain;PSRP-3/Ycf65 superfamily;Pentatricopeptide repeat;Ribosomal protein PSRP-3/Ycf65;Tetratricopeptide-like helical domain superfamily;Transferase;UDP-glucuronosyl/UDP-glucosyltransferase;
B9G2H8.1	Single-copy	129	44.2987	85.3535	36.4485		Os09g0272200 protein			Q2R1U5.1(15.5);Q7XMK5.1(13.9);Q5VRL4.1(11.9);Q94JK5.1(10.9);Q7XRM0.1(10.4);	CALMODULIN-BINDING PROTEIN60;GTP binding domain;GTP-binding protein, middle domain;GTPase HflX;GTPase HflX, N-terminal;GTPase HflX, N-terminal domain superfamily;HflX-type guanine nucleotide-binding (G) domain;Kelch-type beta propeller;P-loop containing nucleoside triphosphate hydrolase;Protein of unknown function DUF1677, Oryza sativa;Remorin, C-terminal;Remorin, N-terminal;SNARE;Small GTP-bindi…
A0A0P0VH67.1	Single-copy	129	42.9637	87.0636	36.3629		Os02g0255066 protein			Q2QW43.1(20.8);Q658H9.1(18.1);Q6H6S3.1(16.3);A0A0P0VJX9.1(10.5);	AAA+ ATPase domain;ATPase, AAA-type, core;Helix-turn-helix motif;Homeobox domain;Homeobox, conserved site;Homeobox-like domain superfamily;Leucine zipper, homeobox-associated;P-loop containing nucleoside triphosphate hydrolase;Protein kinase domain;Protein kinase, ATP binding site;Protein kinase-like domain superfamily;Serine-threonine/tyrosine-protein kinase, catalytic domain;Serine/threonine-pr…
Q6Z4S7.1	Single-copy	81	54.3133	77.0272	36.3242		Os07g0122350 protein			Q0E3V2.1(17.8);Q2QN08.1(15.3);Q0E3X4.2(15.0);A0A0P0WXV9.1(14.8);	BTB/POZ domain;DEAD/DEAH box helicase domain;Helicase superfamily 1/2, ATP-binding domain;Helicase, C-terminal;NPH3 domain;P-loop containing nucleoside triphosphate hydrolase;Protein FERTILITY RESTORER RF2-like;Protein of unknown function DUF4228, plant;RNA helicase, DEAD-box type, Q motif;SKP1/BTB/POZ domain superfamily;Zinc finger, CCHC-type;Zinc finger, CCHC-type superfamily;
A0A0P0X0L5.1	Homologous	97	43.9191	85.6402	36.318	A0A0P0VIP2.1(33.8);	Os06g0692050 protein			A0A0P0WIM0.1(13.1);Q8H811.1(12.8);A0A0P0XV54.1(12.7);A0A0N7KT99.1(10.5);	Alpha/Beta hydrolase fold;Leucine-rich repeat;Leucine-rich repeat domain superfamily;Leucine-rich repeat-containing N-terminal, plant-type;Peptidase S10, serine carboxypeptidase;Protein kinase domain;Protein kinase, ATP binding site;Protein kinase-like domain superfamily;Serine carboxypeptidases, histidine active site;
A0A0N7KGG3.1	Single-copy	97	36.5557	117.003	36.2264		Os03g0112500 protein			Q6F3B4.1(16.3);Q8LNH6.1(14.4);Q94DH3.1(13.9);Q337X1.1(11.7);	CH domain superfamily;Calponin homology domain;EB1, C-terminal;EB1, C-terminal domain superfamily;Homeobox-like domain superfamily;Intermediate filament, rod domain, coil 1B;Microtubule-associated protein RP/EB;Myb domain;Myb domain, plants;SANT/Myb domain;SNARE;Syntaxin, N-terminal domain;Syntaxin/epimorphin, conserved site;TATA-box binding protein;TATA-box binding protein, conserved site;TATA-b…
A0A0P0XXA1.1	Single-copy	119	70.3722	70.5857	36.2163		Os10g0563550 protein			Q9LIS6.1(19.8);Q6AW02.1(18.2);Q6AVQ3.1(18.1);Q5J4W4.1(16.4);Q8LNI5.1(16.3);	Glycogen synthase kinase 3, catalytic domain;Protein kinase domain;Protein kinase, ATP binding site;Protein kinase-like domain superfamily;Serine/threonine-protein kinase, active site;Tyrosine-protein kinase, active site;Tyrosine-protein kinase, catalytic domain;
A0A0P0YB72.1	Homologous	92	43.9398	85.3543	36.1537	A0A0N7KG84.1(151.0);	Os12g0544120 protein			Q8H7R6.1(15.2);A0A0P0X4L9.1(15.1);Q7XEK8.1(13.0);	Cytochrome P450;Cytochrome P450 superfamily;Protein kinase domain;Protein kinase, ATP binding site;Protein kinase-like domain superfamily;Protein of unknown function PDDEXK-like;Serine-threonine/tyrosine-protein kinase, catalytic domain;Serine/threonine-protein kinase, active site;Wall-associated receptor kinase, galacturonan-binding domain;
Q2HWG1.1	Homologous	121	565.583	43.1438	36.0996	Q8GVV6.1(229.7);Q2HWG0.1(227.0);Q6K9T0.1(118.7);Q6H468.1(115.6);Q2HWH1.1(113.6);	Two-component response regulator ORR12	CheY-like superfamily;Signal transduction response regulator, receiver domain;		Q0D3B6.1(76.3);Q5SML5.1(73.4);Q689G6.1(72.2);Q10N34.1(71.9);Q6K8X6.1(70.5);Q8H7S7.1(69.3);Q5N6V8.2(67.9);Q6H805.1(65.9);Q67W50.1(61.1);	CCT domain;CheY-like superfamily;Homeobox-like domain superfamily;Myb domain;Myb domain, plants;Response regulator B-type, plant;SANT/Myb domain;Signal transduction response regulator, receiver domain;
A0A0P0V4T2.1	Single-copy	132	323.77	49.2371	36.0754		FBD domain-containing protein	FBD domain;		Q5ZB59.1(88.6);Q5ZB57.1(69.0);Q0JES4.1(68.5);Q0JES5.1(66.0);A0A0P0VFJ1.1(60.7);Q0DC30.1(58.3);Q8LQV5.1(57.9);Q9AWX3.1(39.0);	F-box domain;F-box-like domain superfamily;FBD domain;Leucine-rich repeat domain superfamily;
C7J1S0.1	Single-copy	132	501.774	44.4122	36.0469		AAA_12 domain-containing protein			A0A0P0WE98.1(111.5);A0A0P0WDW2.1(103.8);A0A0P0VZ57.1(57.5);A0A0P0WAJ1.1(57.4);A0A0P0VN81.1(56.0);Q0J3D0.1(48.1);	DNA2/NAM7 helicase, AAA domain;DNA2/NAM7 helicase-like, AAA domain;Helicase superfamily 1/2, ATP-binding domain;P-loop containing nucleoside triphosphate hydrolase;TPR and ankyrin repeat-containing protein 1;Tetratricopeptide-like helical domain superfamily;UvrD-like helicase, ATP-binding domain;
A0A0P0WXW5.1	Single-copy	73	598.738	42.5192	36.0411		Os06g0570650 protein			Q6ERS0.1(94.8);Q6Z9F4.1(67.2);Q6ZLP5.1(65.2);Q6X4A2.1(56.9);Q8LIG4.1(56.0);Q60EY8.1(53.2);Q68Y49.1(52.6);Q7X996.1(52.3);Q9LWM4.1(50.3);Q5JLS2.1(50.3);	KA1 domain/Ssp2, C-terminal;NAF domain;NAF/FISL domain;Protein kinase domain;Protein kinase, ATP binding site;Protein kinase-like domain superfamily;Serine/threonine-protein kinase, active site;
A0A0P0VCU4.1	Single-copy	52	36.307	117.942	36.009		Os01g0944900 protein			Q8S1V1.1(13.9);Q0JG30.2(13.1);	Aspartic peptidase A1 family;Aspartic peptidase domain superfamily;Glycoside hydrolase family 17;Glycoside hydrolase superfamily;Peptidase family A1 domain;Xylanase inhibitor I-like;Xylanase inhibitor, C-terminal;Xylanase inhibitor, N-terminal;
A0A0P0V285.1	Single-copy	79	40.7448	90.2304	35.9856		Os01g0328201 protein			Q6H6S3.1(15.7);A0A0P0VMM0.1(12.3);Q0E2Y9.1(11.0);	F-box domain;F-box-like domain superfamily;Helix-turn-helix motif;Homeobox domain;Homeobox, conserved site;Homeobox-like domain superfamily;Kelch repeat type 1;Kelch-type beta propeller;Leucine zipper, homeobox-associated;Myb-like domain;SANT/Myb domain;
A0A0P0XDR5.1	Single-copy	139	113.915	62.2691	35.9755		MATH domain-containing protein	MATH/TRAF domain;TRAF-like;		A0A0P0XDJ3.1(67.1);A0A0P0XE17.1(59.8);Q7F0Z3.1(50.7);A0A0P0XDF6.1(49.0);A0A0P0XBI2.1(29.6);A0A0N7KP81.1(27.6);Q337Y6.2(23.9);Q8H3E5.1(22.9);	BPM, C-terminal;BTB/POZ domain;MATH/TRAF domain;SKP1/BTB/POZ domain superfamily;TRAF-like;
A0A0P0Y8R0.1	Single-copy	59	36.6706	108.959	35.9402		Os12g0265800 protein			Q0J7Y8.2(15.3);A0A0P0VFL7.1(11.8);	ATP-dependent RNA helicase DEAD-box, conserved site;DEAD/DEAH box helicase domain;Helicase superfamily 1/2, ATP-binding domain;Helicase, C-terminal;P-loop containing nucleoside triphosphate hydrolase;Protein POLAR-like;RNA helicase, DEAD-box type, Q motif;
A0A0P0X369.1	Single-copy	110	54.4886	76.6027	35.9255		Os07g0193701 protein			Q2QXA8.1(15.9);B7F980.1(15.7);Q8LIY8.1(15.5);Q67V82.1(11.8);	ACT domain;Carotenoid oxygenase;Protein kinase domain;Protein kinase-like domain superfamily;Protein of unknown function DUF4228, plant;Protein of unknown function DUF616;Serine-threonine/tyrosine-protein kinase, catalytic domain;Serine/threonine-protein kinase, active site;
A0A0P0WYC8.1	Single-copy	137	385.599	47.2431	35.9209		HisKA domain-containing protein	Signal transduction histidine kinase, dimerisation/phosphoacceptor domain;Signal transduction histidine kinase, dimerisation/phosphoacceptor domain superfamily;		Q7XX84.1(101.0);Q7F239.1(70.4);Q53RH0.1(55.8);Q0DKM0.1(49.1);A1A696.1(28.9);A1A699.1(26.6);A1A698.1(25.8);A1A697.1(21.3);A3BE68.1(17.2);	CHASE domain;CheY-like superfamily;Ethylene receptor;GAF domain;GAF-like domain superfamily;Histidine kinase domain;Histidine kinase/HSP90-like ATPase;Histidine kinase/HSP90-like ATPase superfamily;PAS domain superfamily;Signal transduction histidine kinase, dimerisation/phosphoacceptor domain;Signal transduction histidine kinase, dimerisation/phosphoacceptor domain superfamily;Signal transductio…
A0A0P0Y8Y2.1	Single-copy	80	77.2476	68.5375	35.8045		Os12g0276550 protein			Q5VRW2.2(14.2);Q0DB68.1(13.6);C7J0V5.1(13.0);Q0D6Q9.1(12.5);Q75IS2.1(11.7);	3'-5' exonuclease domain;EF-Hand 1, calcium-binding site;EF-hand domain;EF-hand domain pair;Exonuclease Mut-7, DEDDy 3'-5' exonuclease domain;FAR1 DNA binding domain;FHY3/FAR1 family;HD/PDEase domain;Homeobox-like domain superfamily;MULE transposase domain;Mut7-C RNAse domain;Myb domain;Myb domain, plants;RelA/SpoT;Ribonuclease CAF1;Ribonuclease H superfamily;Ribonuclease H-like superfamily;Zinc …
A0A0P0VAY5.1	Homologous	58	904.178	38.1036	35.7671	A0A0P0WVI7.1(34.7);B9F620.1(34.1);	Os01g0872450 protein			Q69LA3.1(86.7);Q5N734.1(86.4);A0A0P0VBU6.1(85.6);Q5N747.1(83.1);Q0JHC3.1(82.8);Q0JHC1.2(81.4);Q9FU86.1(81.3);Q8RZ75.1(78.1);Q7XGT7.1(75.4);	MFS transporter superfamily;PTR2 family proton/oligopeptide symporter, conserved site;Proton-dependent oligopeptide transporter family;
A0A0P0WWL2.1	Homologous	97	430.874	45.9763	35.7591	A0A0P0XZZ0.1(38.2);	Os06g0482700 protein	Heat shock protein 70 family;		Q10NA1.1(90.6);Q10NA9.1(88.1);Q6L509.1(88.1);Q943K7.1(87.5);Q2R9K4.1(86.4);	Heat shock protein 70 family;Heat shock protein 70, conserved site;Heat shock protein 70kD, C-terminal domain superfamily;Heat shock protein 70kD, peptide-binding domain superfamily;
A0A0P0Y871.1	Homologous	105	378.268	47.4029	35.752	A0A0P0WXK0.1(43.7);A0A0P0W6E8.1(31.6);	PEROXIDASE_4 domain-containing protein			Q5QNM7.1(116.5);Q5Z9B2.1(101.9);Q5Z9B3.1(101.2);Q7F1U2.1(95.1);Q5Z7J2.1(95.1);Q5U1Q2.1(94.7);Q7F1U0.1(93.0);Q7XIX1.1(93.0);Q0JM38.1(90.8);Q6ER51.1(90.2);	Haem peroxidase;Haem peroxidase superfamily;Peroxidase, active site;Peroxidases heam-ligand binding site;Plant peroxidase;Secretory peroxidase;
Q5JML4.1	Homologous	89	47.354	81.2416	35.7409	Q68Y43.1(30.1);	Os01g0754600 protein	CLAVATA3/ESR (CLE)-related protein 1/3/4;		Q4PR39.2(13.9);B7ECS8.2(12.9);Q5QM06.1(12.8);A0A0P0WHP0.1(12.8);Q8H042.1(12.5);	Dirigent protein;Expansin;Expansin, cellulose-binding-like domain;Expansin, cellulose-binding-like domain superfamily;Expansin/Lol pI;Expansin/pollen allergen, DPBB domain;Glycoside hydrolase family 1;Glycoside hydrolase superfamily;Glycosyl hydrolases family 1, N-terminal conserved site;Haem peroxidase;Haem peroxidase superfamily;NPR1/NH1-interacting protein;Peroxidase, active site;Peroxidases h…
A0A0N7KTI2.1	Single-copy	116	225.052	53.3017	35.6589		Os12g0125500 protein			A0A0P0VU39.1(57.8);Q6K5E6.1(53.6);Q6ZB84.1(52.1);Q6ZJI2.1(37.6);A0A0N7KDT4.1(31.5);Q75LU9.1(31.4);Q8H802.1(31.4);Q2QM65.1(26.9);	Multi antimicrobial extrusion protein;
Q0DVD9.1	Homologous	129	222.441	53.4364	35.6465	A2ZT76.1(41.5);	GST C-terminal domain-containing protein			Q9AS59.1(108.6);Q8H8D6.1(108.2);A0A0P0XQK1.1(105.3);Q9AS47.1(103.2);Q7XCK0.1(102.0);Q65XF1.1(98.3);O82451.3(98.0);Q8LR62.1(97.5);Q93WM2.1(91.5);	Glutathione S-transferase, C-terminal;Glutathione S-transferase, C-terminal domain superfamily;Glutathione S-transferase, C-terminal-like;Glutathione S-transferase, N-terminal;Glutathione S-transferases Phi, C-terminal;Glutathione Transferase family;Thioredoxin-like superfamily;
A0A0P0WMI2.1	Single-copy	136	61.0186	73.3956	35.6399		Os05g0423301 protein			Q6YYK3.1(15.7);Q7F0P5.1(13.1);Q2QW43.1(12.5);Q6YTX9.1(10.6);A0A0P0WAB9.1(10.4);Q8LR61.1(10.3);	AAA+ ATPase domain;AMP-binding enzyme, C-terminal domain;AMP-binding, conserved site;AMP-dependent synthetase-like superfamily;AMP-dependent synthetase/ligase;ATPase, AAA-type, core;Acetate-CoA ligase;Acetyl-coenzyme A synthetase, N-terminal domain;Leucine-rich repeat;Leucine-rich repeat domain superfamily;P-loop containing nucleoside triphosphate hydrolase;Pex, N-terminal;Protein MIZU-KUSSEI 1-l…
Q2QPR1.1	Single-copy	129	329.863	48.8674	35.5643		Protein kinase domain-containing protein	Protein kinase-like domain superfamily;Protein kinase domain;		Q6MWE1.1(45.2);Q7XHW7.1(43.5);Q67IT6.1(42.1);Q67WE5.1(41.4);Q5Z666.1(41.0);Q67IS9.1(40.3);Q5Z665.1(40.1);	Leucine-rich repeat;Leucine-rich repeat domain superfamily;Leucine-rich repeat, typical subtype;Leucine-rich repeat-containing N-terminal, plant-type;Protein kinase domain;Protein kinase, ATP binding site;Protein kinase-like domain superfamily;Serine-threonine/tyrosine-protein kinase, catalytic domain;Serine/threonine-protein kinase, active site;
A0A0P0UXQ6.1	Homologous	55	214.958	53.8127	35.5498	Q0J1H2.1(55.2);A0A0P0X0H8.1(48.8);A0A0P0W440.1(43.7);A0A0P0VEX3.1(38.6);	Os01g0137550 protein			A0A0P0XD22.1(92.5);A0A0P0UX91.1(57.7);	HAT, C-terminal dimerisation domain;Protein kinase domain;Protein kinase, ATP binding site;Protein kinase-like domain superfamily;Ribonuclease H-like superfamily;Serine/threonine-protein kinase, active site;Wall-associated receptor kinase, galacturonan-binding domain;Zinc finger C2H2 superfamily;Zinc finger, BED-type;hAT-like transposase, RNase-H fold;
A0A0P0WPI8.1	Single-copy	37	38.0385	96.5351	35.5366		CSTF_C domain-containing protein	CSTF2, C-terminal domain superfamily;Transcription termination and cleavage factor, C-terminal domain;		Q53PI0.1(24.5);	CSTF2, C-terminal domain superfamily;Cleavage stimulation factor subunit 2, hinge domain;Nucleotide-binding alpha-beta plait domain superfamily;RNA recognition motif domain;RNA-binding domain superfamily;Transcription termination and cleavage factor, C-terminal domain;
Q0DHP0.1	Single-copy	137	84.5228	66.7737	35.5026		Os05g0454400 protein			Q8S5X8.1(45.4);Q69TY8.1(31.5);Q2R2M3.1(18.2);	LysM domain;LysM domain superfamily;Protein kinase domain;Protein kinase-like domain superfamily;Serine-threonine/tyrosine-protein kinase, catalytic domain;Tyrosine-protein kinase, active site;
Q6EP65.1	Single-copy	80	216.77	53.6514	35.3694		Os09g0261400 protein	GBF-interacting protein 1;UBA-like superfamily;		Q69NN2.1(58.9);Q688W7.1(36.2);Q5SN38.1(35.1);Q688S7.1(25.9);	GBF-interacting protein 1;UBA-like superfamily;
A0A0P0XBD6.1	Single-copy	110	40.2467	89.4709	35.221		Os08g0119400 protein			Q7EZC9.1(17.8);A0A0P0VM41.1(16.5);A0A0P0XX76.1(16.3);Q7F8R0.1(14.2);	FeoB-type guanine nucleotide-binding (G) domain;GTP binding domain;K Homology domain;K Homology domain, type 1;K Homology domain, type 1 superfamily;NOG1, N-terminal helical domain;Nucleolar GTP-binding protein 1, Rossman-fold domain;P-loop containing nucleoside triphosphate hydrolase;Protein of unknown function DUF604;Protein phosphatase 2A regulatory subunit PR55;WD40-repeat-containing domain s…
A0A0P0WVC2.1	Single-copy	136	45.2729	82.2463	34.9904		Os06g0271200 protein			Q6H6Q2.1(52.4);Q7XUJ5.2(14.8);Q2R2Z4.1(12.6);	Bulb-type lectin domain;Bulb-type lectin domain superfamily;Gdt1 family;Helix-turn-helix motif;Homeobox domain;Homeobox, conserved site;Homeobox-like domain superfamily;Leucine zipper, homeobox-associated;PAN/Apple domain;S-locus glycoprotein domain;
A0A0P0XL59.1	Single-copy	108	490.424	44.338	34.9895		ANK_REP_REGION domain-containing protein	Ankyrin repeat-containing domain;Ankyrin repeat-containing domain superfamily;		Q0J5U5.1(107.1);Q6EPK9.1(79.3);A0A0P0XLJ7.1(74.8);B9G305.1(68.7);Q0J2H4.1(67.0);A0A0P0XL82.1(63.8);A0A0P0XKR2.1(59.9);A0A0P0Y0C4.1(53.6);	Ankyrin repeat;Ankyrin repeat-containing domain;Ankyrin repeat-containing domain superfamily;PGG domain;
A0A0P0W7E5.1	Single-copy	91	98.3799	64.0264	34.9197		Os04g0207401 protein			A0A0P0XVI7.1(50.8);Q6ZHD2.1(15.6);Q6H6V9.1(10.1);	Homeobox-like domain superfamily;Leucine-rich repeat;Leucine-rich repeat domain superfamily;Leucine-rich repeat, typical subtype;MADS MEF2-like;Myb domain;Myb domain, plants;Protein kinase domain;Protein kinase, ATP binding site;Protein kinase-like domain superfamily;SANT/Myb domain;Transcription factor, MADS-box;Transcription factor, MADS-box superfamily;Tyrosine-protein kinase, active site;
A0A0P0XCI9.1	Single-copy	92	39.9531	89.2783	34.8794		Os08g0178650 protein	Protein of unknown function wound-induced;		Q8L4B1.1(21.7);A0A0P0WR41.1(12.7);	AATF leucine zipper-containing domain;Apoptosis-antagonizing transcription factor, C-terminal;Leucine-rich repeat;Leucine-rich repeat domain superfamily;Leucine-rich repeat, typical subtype;Protein AATF/Bfr2;Protein kinase-like domain superfamily;Serine-threonine/tyrosine-protein kinase, catalytic domain;
A0A0P0VZS7.1	Single-copy	125	188.184	55.1824	34.8444		TAXi_N domain-containing protein			Q2QN11.1(49.0);A0A0P0XX90.1(31.1);Q8LNM6.1(28.1);Q8LNN1.1(27.9);Q8LNM7.1(27.3);A0A0N7KH60.1(26.2);Q0D5V1.1(26.1);Q10M95.1(26.0);Q8LNM1.1(24.9);A0A0P0VWR5.1(24.3);	Aspartic peptidase A1 family;Aspartic peptidase domain superfamily;Aspartic peptidase, active site;Pepsin-like domain, plant;Peptidase family A1 domain;Xylanase inhibitor, C-terminal;Xylanase inhibitor, N-terminal;
A0A0P0VTC7.1	Homologous	93	417.051	46.0366	34.8037	A0A0P0VD07.1(32.2);	Os03g0158100 protein			Q6YUV2.1(97.7);Q6I5R8.1(78.7);Q60DV9.1(75.0);Q652E9.1(72.5);Q6K449.1(70.6);Q5Z916.1(66.1);Q10MG0.1(65.7);Q0J3C5.1(65.5);A0A0P0VP97.1(64.1);	GDSL lipase/esterase;GDSL lipase/esterase-like, plant;SGNH hydrolase superfamily;
A0A0P0V6K8.1	Single-copy	118	39.2237	90.4593	34.734		Os01g0681332 protein			Q655V6.1(14.9);A0A0P0YE31.1(12.8);	Leucine rich repeat 4;Leucine-rich repeat;Leucine-rich repeat domain superfamily;Leucine-rich repeat, typical subtype;Leucine-rich repeat-containing N-terminal, plant-type;Protein kinase domain;Protein kinase, ATP binding site;Protein kinase-like domain superfamily;Serine-threonine/tyrosine-protein kinase, catalytic domain;Serine/threonine-protein kinase, active site;
A0A0P0WI35.1	Single-copy	129	1180.22	35.0186	34.6573		LRRNT_2 domain-containing protein	Leucine-rich repeat domain superfamily;Leucine-rich repeat-containing N-terminal, plant-type;		A3A4G6.1(119.7);Q0D699.1(118.2);A0A0P0VGF0.1(112.8);B9FTY2.1(112.2);A0A0P0WIF5.1(112.1);Q69X93.1(111.5);A0A0P0WYL7.1(111.3);Q6YT77.1(110.8);Q2R0Y6.1(109.1);Q69KC4.1(108.9);	Leucine-rich repeat;Leucine-rich repeat domain superfamily;Leucine-rich repeat, typical subtype;Leucine-rich repeat-containing N-terminal, plant-type;Protein kinase domain;Protein kinase, ATP binding site;Protein kinase-like domain superfamily;Serine-threonine/tyrosine-protein kinase, catalytic domain;Serine/threonine-protein kinase, active site;
B9FER1.1	Single-copy	132	75.2143	68.4038	34.6121		Os04g0371550 protein			Q7XM97.1(83.3);Q0DZH4.1(35.7);Q8S1S0.1(14.4);	Lung seven transmembrane receptor-like;
A0A0P0X830.1	Homologous	85	45.0115	82.0035	34.5953	Q0IYC5.1(42.0);	WPP domain-containing protein			Q65XN1.1(29.4);A0A0P0XKL1.1(11.8);	Leucine-rich repeat;Leucine-rich repeat domain superfamily;Protein of unknown function DUF220;START-like domain superfamily;WPP domain;WPP domain superfamily;
A0A0P0Y625.1	Single-copy	85	37.6309	94.2365	34.5682		Os12g0106801 protein			Q6I5V4.1(19.0);Q53MM5.1(12.4);	Chloramphenicol acetyltransferase-like domain superfamily;MFS transporter superfamily;PTR2 family proton/oligopeptide symporter, conserved site;Proton-dependent oligopeptide transporter family;Transferase;
A0A0P0WW26.1	Single-copy	119	157.411	57.3067	34.5315		Os06g0302100 protein	Protein of unknown function DUF604;		Q7XQ75.1(106.8);Q6EPN2.1(98.8);Q10NG1.1(26.6);	Protein of unknown function DUF604;
A0A0P0V0C2.1	Single-copy	93	238.309	52.2484	34.5314		Os01g0231300 protein			Q10MM6.1(55.3);Q0JA85.1(37.4);Q655Y8.1(31.9);Q10LT8.1(30.9);B9G923.1(30.5);Q2QYK3.2(30.3);Q339K4.1(30.2);	Complement Clr-like EGF domain;EGF-like calcium-binding domain;EGF-like calcium-binding, conserved site;PA domain;Protein of unknown function DUF761, plant;Thioredoxin-like superfamily;
Q0IYZ2.1	Homologous	102	199.32	54.3608	34.4992	A0A0P0WDN5.1(37.7);A0A0P0XFC6.1(37.6);	Os10g0147200 protein			Q10P75.1(109.5);Q2QLS3.1(94.0);Q10P77.1(82.4);Q69JY6.1(78.3);Q69JY8.1(71.6);A0A0P0VV61.1(70.5);Q2QLS7.1(64.7);	Osmotin/thaumatin-like superfamily;Thaumatin family;Thaumatin, conserved site;
A0A0P0V322.1	Single-copy	138	184.106	55.329	34.4985		Os01g0367800 protein			A0A0P0X6L2.1(39.1);A0A0P0VJT3.1(38.6);A0A0P0XUP5.1(38.0);A0A0P0XDB5.1(23.6);A0A0P0XD22.1(17.0);A3BQI0.1(15.2);A0A0P0XT91.1(13.1);	Gnk2-homologous domain;Gnk2-homologous domain superfamily;HAT, C-terminal dimerisation domain;Protein kinase domain;Protein kinase, ATP binding site;Protein kinase-like domain superfamily;Ribonuclease H-like superfamily;Serine/threonine-protein kinase, active site;WRKY domain;WRKY domain superfamily;Zinc finger C2H2 superfamily;Zinc finger, BED-type;hAT-like transposase, RNase-H fold;
B9F059.1	Single-copy	92	59.0361	73.4033	34.493		Os02g0505232 protein			Q0DSV9.2(76.8);	DNA topoisomerase VI, subunit A;Spo11/DNA topoisomerase VI subunit A;Spo11/DNA topoisomerase VI subunit A superfamily;Spo11/DNA topoisomerase VI, subunit A, N-terminal;Topoisomerase 6 subunit A/Spo11, TOPRIM domain;Winged helix-like DNA-binding domain superfamily;
A0A0P0XT11.1	Single-copy	122	239.314	52.1721	34.4514		Os10g0345701 protein			Q10ES5.1(107.9);Q8H2N8.1(93.8);Q69P50.1(76.9);A0A0P0XKT1.1(35.7);Q9AV13.1(21.7);A0A0P0VZI5.1(20.2);	QWRF family;
B7EDI5.1	Homologous	135	372.865	47.1281	34.3744	A0A0P0WJU3.1(151.5);A0A0P0WJZ9.1(138.1);A0A0P0WEZ8.1(103.7);Q0J7D7.1(82.2);	Os05g0257100 protein			A0A0P0WET4.1(111.5);A0A0N7KJP8.1(94.1);Q6EUF7.1(40.7);A0A0P0WKH3.1(26.9);Q6EQG8.1(25.9);Q10LZ2.1(17.0);Q6EUQ1.1(15.0);A0A0P0Y0Y5.1(12.0);	Leucine-rich repeat;Leucine-rich repeat domain superfamily;Leucine-rich repeat, typical subtype;Leucine-rich repeat-containing N-terminal, plant-type;Malectin domain;Protein kinase domain;Protein kinase, ATP binding site;Protein kinase-like domain superfamily;Serine-threonine/tyrosine-protein kinase, catalytic domain;Serine/threonine-protein kinase, active site;
A0A0P0WC96.1	Single-copy	125	488.172	44.1912	34.3571		WD_REPEATS_REGION domain-containing protein			Q0JAK5.1(94.5);Q10RP1.1(85.1);Q0D730.1(75.0);Q10DN8.1(55.8);Q337H9.1(53.0);Q2R1T0.1(52.5);Q10LA2.1(52.3);Q67WC9.1(50.6);Q67UR9.1(49.6);Q33BI7.1(49.6);	G-protein beta WD-40 repeat;G-protein, beta subunit;Katanin p80 subunit B1;Katanin p80 subunit, C-terminal;LIS1 homology motif;NLE;PRP4-like superfamily;Pre-mRNA processing factor 4 (PRP4)-like;Quinoprotein alcohol dehydrogenase-like superfamily;Small-subunit processome, Utp12;Small-subunit processome, Utp13;TFIID subunit TAF5, NTD2 domain;TFIID subunit TAF5, NTD2 domain superfamily;Transcription…
Q0JAF6.1	Single-copy	92	166.657	56.4935	34.2919		Os04g0601800 protein			Q10HP1.1(76.1);Q6ZKI1.1(72.6);Q0J0H6.1(66.9);Q6K456.1(66.8);Q2R8U1.1(47.5);	MORF/ORRM1/DAG-like;
A0A0P0XHB9.1	Single-copy	150	79.7197	67.1427	34.2036		Os08g0485000 protein	Protein EXORDIUM-like;		Q67X78.1(75.9);Q6Z7W3.1(58.1);Q0DXF4.1(47.3);Q6Z681.1(46.5);Q67W03.1(46.4);Q6Z677.1(44.2);Q8S7K1.1(42.7);Q67X72.1(42.0);Q8LHZ7.1(32.5);	Protein EXORDIUM-like;
A0A0P0VN14.1	Single-copy	87	57.2606	73.8115	34.0214		Os02g0668300 protein			Q2QLS3.1(16.1);P31110.1(15.6);Q2QLS7.1(15.0);Q10P75.1(15.0);Q2QLS9.1(15.0);Q2QLS8.1(14.9);A0A0P0YCG8.1(14.8);Q75GX3.1(13.3);	Osmotin/thaumatin-like superfamily;Thaumatin family;Thaumatin, conserved site;
Q8GZZ0.1	Single-copy	59	73.7044	68.4559	34.0127		Os03g0285200 protein			Q94GN4.1(13.8);Q94GM9.1(13.4);Q7XC52.1(11.2);Q651V6.1(10.8);	Auxin efflux carrier component 2;Auxin efflux carrier, plant type;Cellulose synthase;Membrane transport protein;Nucleotide-diphospho-sugar transferases;Protein kinase domain;Protein kinase-like domain superfamily;Protein of unknown function DUF761, plant;Serine-threonine/tyrosine-protein kinase, catalytic domain;Serine/threonine-protein kinase, active site;
A0A0P0XT24.1	Single-copy	77	49.5914	77.7766	33.9788		Os10g0163190 protein			A0A0N7KJC3.1(14.6);A0A0P0XT43.1(14.1);Q67VR7.1(13.6);	Isopenicillin N synthase-like;Non-haem dioxygenase N-terminal domain;Oxoglutarate/iron-dependent dioxygenase;Protein unc-13 homologue;Ssl1-like;TFIIH C1-like domain;TFIIH subunit Ssl1/p44;Zinc finger C2H2-type;Zinc finger, RING/FYVE/PHD-type;von Willebrand factor A-like domain superfamily;von Willebrand factor, type A;
A0A0N7KRL9.1	Single-copy	86	45.0734	81.0093	33.8246		Os10g0336800 protein			Q10QS3.1(18.9);Q7XD86.2(15.0);Q2R080.1(10.0);	Kelch-type beta propeller;Leucine-rich repeat domain superfamily;P-loop containing nucleoside triphosphate hydrolase;Protein of unknown function DUF1677, Oryza sativa;Rx, N-terminal;Tetratricopeptide repeat;Tetratricopeptide repeat 1;Tetratricopeptide repeat 2;Tetratricopeptide repeat-containing domain;Tetratricopeptide-like helical domain superfamily;Virus X resistance protein-like, coiled-coil …
A0A0P0XCG0.1	Homologous	124	34.301	112.033	33.7959	A0A0P0XCL0.1(219.9);	Os08g0185566 protein			Q8L570.1(17.9);Q10Q30.1(13.8);	Alpha/Beta hydrolase fold;Fungal lipase-like domain;Glycosyl transferase, family 8;Mono-/di-acylglycerol lipase, N-terminal;Nucleotide-diphospho-sugar transferases;Plant galacturonosyltransferase GAUT;
A0A0P0XVL5.1	Single-copy	95	93.4901	64.3042	33.7811		Os10g0465350 protein			A0A0P0XSS8.1(30.8);A0A0P0W2I7.1(25.0);Q65XL3.1(20.8);	Protein of unknown function DUF3615;
A0A0P0Y0M3.1	Single-copy	141	117.266	60.9518	33.7797		GH16 domain-containing protein			Q5Z6H0.1(88.1);A0A0P0XDI5.1(87.8);Q2R336.1(85.1);Q7XNY6.1(84.1);Q5Z6H3.1(83.3);A3AX59.1(82.6);Q5Z6G7.1(80.8);A0A0N7KPI2.1(80.4);Q7XTP9.2(77.9);Q76BW5.1(77.0);	Beta-glucanase;Concanavalin A-like lectin/glucanase domain superfamily;Glycoside hydrolase family 16;Glycoside hydrolase, family 16, active site;Xyloglucan endo-transglycosylase, C-terminal;Xyloglucan endotransglucosylase/hydrolase;
A0A0P0VZ56.1	Single-copy	89	34.802	104.966	33.7786		Os03g0432666 protein			Q9SDG8.1(14.0);Q653P2.1(13.6);A0A0N7KJQ5.1(12.1);	Argonaute linker 2 domain;Argonaute, linker 1 domain;Bromodomain;Bromodomain-like superfamily;Homeobox-like domain superfamily;Myb domain;Myb-like domain;Myb-like transcription factor;NET domain;NET domain superfamily;PAZ domain;PAZ domain superfamily;Piwi domain;Protein argonaute, N-terminal;Putative transcription factor GTE, bromodomain;Ribonuclease H superfamily;Ribonuclease H-like superfamily…
A0A0P0Y1L1.1	Single-copy	100	90.9317	64.735	33.766		Os11g0300650 protein			Q6K431.1(40.9);Q5NAU4.1(22.6);A0A0P0WFU7.1(17.0);	ATX1/2, PHD domain;ATX1/2, ePHD domain;ATX3/4/5, PHD domain;Armadillo-type fold;Extended PHD (ePHD) domain;FY-rich, C-terminal;FY-rich, N-terminal;Histone-lysine N-methyltransferase ATX;JmjC domain-containing;PWWP domain;Post-SET domain;Protein kinase C-like, phorbol ester/diacylglycerol-binding domain;SET domain;Tudor domain;Zinc finger, FYVE/PHD-type;Zinc finger, PHD-finger;Zinc finger, PHD-typ…
A0A0P0WYZ9.1	Single-copy	75	43.0358	82.9267	33.7658		Os06g0610550 protein			Q0J3H7.1(15.7);Q5QM06.1(15.4);Q6AT61.1(14.5);B9F1N5.1(13.5);A0A0P0Y1F5.1(13.3);	Cyclin;Cyclin, N-terminal;Cyclin-like;Cyclin-like superfamily;Exocyst complex component Exo70;GOSR2/Membrin/Bos1;NPR1/NH1-interacting protein;Protein kinase domain;Protein kinase-like domain superfamily;Serine-threonine/tyrosine-protein kinase, catalytic domain;
A0A0P0Y5D9.1	Homologous	56	112.783	61.4893	33.7455	A0A0P0Y5L9.1(105.8);A0A0P0XXT8.1(77.7);A0A0P0W867.1(74.1);A0A0P0Y2M7.1(71.8);B9F8L6.1(46.6);A0A0P0Y5G0.1(39.3);Q6F332.3(33.2);Q0JNS6.2(32.3);Q0JNL7.1(30.9);	Os11g0657700 protein			Q5VQQ5.1(94.3);	EF-Hand 1, calcium-binding site;EF-hand domain;EF-hand domain pair;Protein kinase domain;Protein kinase, ATP binding site;Protein kinase-like domain superfamily;Serine/threonine-protein kinase, active site;
A0A0P0Y5L9.1	Homologous	56	112.783	61.4893	33.7455	A0A0P0Y5D9.1(105.8);A0A0P0XXT8.1(77.4);A0A0P0W867.1(73.8);A0A0P0Y2M7.1(71.5);B9F8L6.1(46.5);A0A0P0Y5G0.1(39.3);Q6F332.3(33.3);Q0JNS6.2(32.3);Q0JNL7.1(31.0);	Os11g0691190 protein			Q5VQQ5.1(94.3);	EF-Hand 1, calcium-binding site;EF-hand domain;EF-hand domain pair;Protein kinase domain;Protein kinase, ATP binding site;Protein kinase-like domain superfamily;Serine/threonine-protein kinase, active site;
A0A0P0XCR0.1	Homologous	120	796.477	38.8192	33.7447	A0A0N7KIS4.1(113.9);A0A0N7KQ49.1(34.2);A0A0P0X7E8.1(32.3);	Os08g0203201 protein			A0A0N7KKF3.1(117.4);Q7F271.1(112.6);Q6Z5A7.1(107.4);A0A0P0WJV8.1(107.3);A0A0P0WK53.1(107.1);A0A0N7KJP8.1(104.5);A0A0P0XDF2.1(99.3);Q6ZKW7.1(96.7);	Gnk2-homologous domain;Gnk2-homologous domain superfamily;Leucine-rich repeat domain superfamily;Malectin domain;Protein kinase domain;Protein kinase, ATP binding site;Protein kinase-like domain superfamily;Serine-threonine/tyrosine-protein kinase, catalytic domain;Serine/threonine-protein kinase, active site;
A0A0P0W457.1	Single-copy	136	34.5075	107.671	33.7278		Os03g0757750 protein			Q10A53.1(14.9);Q65XA2.1(11.7);Q6ZL37.1(10.2);	Armadillo-type fold;Beta-hexosaminidase;Beta-hexosaminidase, eukaryotic type, N-terminal;Beta-hexosaminidase-like, domain 2;GDSL lipase/esterase;GDSL lipase/esterase-like, plant;Glycoside hydrolase family 20, catalytic domain;Glycoside hydrolase superfamily;HEAT repeat;Importin beta family;Importin repeat 4;Importin-beta, N-terminal domain;Lipase, GDSL, active site;SGNH hydrolase superfamily;TOG …
A0A0P0WJB3.1	Single-copy	83	53.715	75.2108	33.7009		Os05g0193850 protein			A0A0P0VYH1.1(16.7);Q7XU42.2(12.6);Q2QVS0.1(12.0);Q8L561.1(10.0);	Leucine-rich repeat;Leucine-rich repeat domain superfamily;Leucine-rich repeat, typical subtype;Leucine-rich repeat-containing N-terminal, plant-type;Protein of unknown function DUF4228, plant;Putative S-adenosyl-L-methionine-dependent methyltransferase;S-adenosyl-L-methionine-dependent methyltransferase;S-phase kinase-associated protein 1;S-phase kinase-associated protein 1-like;SKP1 component, …
A0A0P0VEV5.1	Homologous	149	685.322	40.3725	33.6748	A3A5I8.1(54.2);A0A0P0UYT6.1(37.9);A0A0P0WI35.1(30.0);	LRRNT_2 domain-containing protein			Q6Z0B5.1(119.3);A0A0N7KMA0.1(116.4);A0A0P0VEY2.1(116.1);Q8LI36.1(114.6);Q8L4U4.1(114.2);Q7X616.1(112.8);Q7EYF8.1(112.4);Q2R2D4.1(111.8);Q53P27.1(110.8);	Leucine-rich repeat;Leucine-rich repeat domain superfamily;Leucine-rich repeat, typical subtype;Leucine-rich repeat-containing N-terminal, plant-type;Protein kinase domain;Protein kinase, ATP binding site;Protein kinase-like domain superfamily;Serine-threonine/tyrosine-protein kinase, catalytic domain;Serine/threonine-protein kinase, active site;
A0A0P0V835.1	Single-copy	126	131.149	59.354	33.6306		Os01g0746000 protein			Q657S3.1(96.7);Q5QNA5.1(16.5);	Phosphoenolpyruvate carboxylase;Phosphoenolpyruvate carboxylase, His active site;Phosphoenolpyruvate carboxylase, Lys active site;Phosphoenolpyruvate carboxylase, bacterial/plant-type;Pyruvate/Phosphoenolpyruvate kinase-like domain superfamily;
A0A0P0XSI6.1	Homologous	85	62.2291	71.6118	33.6166	Q5QLR2.1(52.2);P0C291.1(43.0);Q0JP62.1(38.9);	Os10g0177501 protein	Glutaredoxin-like, plant II;		Q0J3L4.2(50.9);Q0IWL9.2(50.5);Q0JM76.1(25.1);	Glutaredoxin;Glutaredoxin subgroup;Glutaredoxin, PICOT-like;Glutaredoxin, eukaryotic/virial;Monothiol glutaredoxin-related;Thioredoxin domain;Thioredoxin-like superfamily;
Q0JF31.1	Single-copy	71	80.8332	66.5831	33.578		Os04g0168300 protein			Q6ZIQ4.1(63.2);Q5Z8U7.1(14.0);	MFS transporter superfamily;Nucleotide-diphospho-sugar transferase;Nucleotide-diphospho-sugar transferases;Proton-dependent oligopeptide transporter family;
A0A0P0X7E8.1	Homologous	148	769.802	39.0824	33.4468	A0A0P0Y3D4.1(49.7);A0A0P0XLA2.1(42.7);C7J989.1(38.3);A0A0P0W6L0.1(37.3);A0A0N7KQ49.1(33.7);A0A0P0XCR0.1(32.4);A0A0P0X7T6.1(31.2);	Protein kinase domain-containing protein	Protein kinase-like domain superfamily;Protein kinase domain;Serine-threonine/tyrosine-protein kinase, catalytic domain;		A0A0N7KKF3.1(116.5);Q7F271.1(115.4);A0A0P0XDF2.1(115.2);A0A0P0WK53.1(113.3);A0A0N7KJP8.1(112.7);Q6ZKW7.1(112.4);A0A0P0W774.1(110.8);Q6Z5A7.1(110.2);A0A0P0WJV8.1(108.5);	Concanavalin A-like lectin/glucanase domain superfamily;Gnk2-homologous domain;Gnk2-homologous domain superfamily;Legume lectin domain;Legume lectin, beta chain, Mn/Ca-binding site;Leucine-rich repeat domain superfamily;Malectin domain;Protein kinase domain;Protein kinase, ATP binding site;Protein kinase-like domain superfamily;Serine-threonine/tyrosine-protein kinase, catalytic domain;Serine/thr…
A0A0P0W9G5.1	Single-copy	77	33.4634	132.638	33.3998		Os04g0393950 protein			Q10EL1.1(11.9);Q6Z3A3.1(11.5);	Ankyrin repeat;Ankyrin repeat-containing domain;Ankyrin repeat-containing domain superfamily;Glutamate--cysteine ligase, GCS2;Glutamate--cysteine ligase, bacteria and plant;Glutamate--cysteine ligase, plant-type;Glutamine synthetase/guanido kinase, catalytic domain;Zinc finger, CCCH-type;
A0A0P0X5B5.1	Single-copy	136	229.639	52.2743	33.3487		Os07g0292100 protein	Cytochrome P450;Cytochrome P450 superfamily;		A0A0P0W5G8.1(107.5);Q6ZIG1.1(60.9);Q0DIV1.1(60.8);Q7G602.1(59.6);B7F956.1(59.0);Q2QPY6.1(58.9);C7J100.1(56.6);	Cytochrome P450;Cytochrome P450 superfamily;Cytochrome P450, E-class, group I;Cytochrome P450, conserved site;
A0A0P0VJN7.1	Single-copy	136	95.8888	63.6773	33.273		Os02g0522800 protein			A0A0P0VJR2.1(95.4);Q7XPN5.2(33.9);B9FU48.1(11.4);	DNA endonuclease RBBP8-like;Papain-like cysteine peptidase superfamily;Peptidase C65, otubain;
Q69Y26.1	Single-copy	115	95.5443	63.7113	33.2271		Os06g0213900 protein			Q0JAI9.1(17.6);Q7EZW6.2(15.4);Q8W3F9.1(13.0);Q5Z6E5.1(12.8);Q8L570.1(11.8);Q6YRM6.1(10.3);	Alpha/Beta hydrolase fold;Cellulose synthase;Fungal lipase-like domain;Glycosyltransferase family 92;Mono-/di-acylglycerol lipase, N-terminal;Nucleotide-diphospho-sugar transferases;SCAMP;Zinc finger, RING/FYVE/PHD-type;
A0A0P0XCL0.1	Homologous	124	34.301	104.1	33.2039	A0A0P0XCG0.1(220.0);	Os08g0182100 protein			Q8L570.1(17.9);Q10Q30.1(13.8);	Alpha/Beta hydrolase fold;Fungal lipase-like domain;Glycosyl transferase, family 8;Mono-/di-acylglycerol lipase, N-terminal;Nucleotide-diphospho-sugar transferases;Plant galacturonosyltransferase GAUT;
Q6H751.1	Homologous	86	164.861	56.2012	33.1415	Q0JDE1.1(80.2);Q2QXM2.1(44.1);	Os02g0530500 protein	Protein LITTLE ZIPPER;		Q2QM96.1(21.8);Q6TAQ6.1(20.2);Q6AST1.1(18.9);Q9AV49.1(18.7);Q5QMZ9.2(13.2);Q10QP3.1(13.1);Q84NC5.2(13.0);Q0JNL3.1(10.2);	Basic-leucine zipper domain;Helix-turn-helix motif;Homeobox domain;Homeobox, conserved site;Homeobox-like domain superfamily;Leucine zipper, homeobox-associated;MADS MEF2-like;MEKHLA;START domain;START-like domain superfamily;Transcription factor TGA like domain;Transcription factor, K-box;Transcription factor, MADS-box;Transcription factor, MADS-box superfamily;
A0A0P0VL62.1	Homologous	70	46.111	79.3671	33.1278	Q6YY25.1(58.6);	Os02g0586100 protein			Q8GVF9.1(20.3);A0A0P0XS14.1(17.0);	AMP-binding enzyme, C-terminal domain;AMP-binding, conserved site;AMP-dependent synthetase-like superfamily;AMP-dependent synthetase/ligase;Haem peroxidase;Haem peroxidase superfamily;Plant peroxidase;Secretory peroxidase;
B9FCN0.1	Single-copy	137	56.1705	73.5993	33.0857		Os04g0627850 protein			A0A0P0WCI3.1(105.4);	Domain unknown function DUF295;F-box domain;F-box-like domain superfamily;
A0A0N7KRQ3.1	Single-copy	81	49.3649	77.0617	33.0525		Os10g0389900 protein			Q10EC6.2(14.3);Q6L4Q8.1(13.6);Q9AWX3.1(12.9);Q7EYX5.1(10.4);	ELK domain;F-box domain;F-box-like domain superfamily;FBD domain;Homeobox KN domain;Homeobox domain;Homeobox, conserved site;Homeobox-like domain superfamily;KNOX1;Protein of unknown function DUF761, plant;Uncharacterised protein family UPF0114;
A0A0P0XPF3.1	Single-copy	70	52.5269	75.2614	33.0175		Os09g0502066 protein			Q65X22.1(19.1);Q10MK8.1(14.1);Q7XP65.1(13.4);A0A0N7KFC2.1(12.9);	Cytochrome P450;Cytochrome P450 superfamily;Isopenicillin N synthase-like;Non-haem dioxygenase N-terminal domain;Oxoglutarate/iron-dependent dioxygenase;Protein of unknown function DUF4228, plant;Protein of unknown function DUF868, plant;
A0A0P0Y897.1	Single-copy	134	67.5124	69.5157	32.9389		Os12g0211301 protein			Q2QW21.1(75.7);A0A0P0Y868.1(45.1);	A/G-specific adenine glycosylase MutY;DNA glycosylase;Endonuclease III, iron-sulphur binding site;Helix-turn-helix, base-excision DNA repair, C-terminal;HhH-GPD domain;MutY, C-terminal;NUDIX hydrolase-like domain superfamily;
A0A0P0XAI9.1	Homologous	44	455.33	44.4705	32.8877	A0A0P0VX49.1(33.9);	Os07g0683025 protein			Q6Z414.1(50.8);A0A0N7KQU7.1(50.7);Q6AU56.1(50.2);Q2QYC1.1(50.1);Q7XQN1.2(49.9);Q75LP7.1(49.9);Q7X8X3.1(49.8);A0A0P0VQE6.1(49.7);	Allergen V5/Tpx-1-related, conserved site;CAP domain;CAP superfamily;Cysteine-rich secretory protein-related;Homeobox-like domain superfamily;Myb domain;Myb-like domain;Myb-like transcription factor;SANT/Myb domain;
A0A0P0WBF6.1	Single-copy	73	33.9153	104.312	32.8526		Os04g0469425 protein			B7FAK0.1(14.0);Q8H7T7.1(13.0);	Aminotransferase class IV;Aminotransferase, class IV, conserved site;Aminotransferase-like, PLP-dependent enzymes;Branched-chain amino acid aminotransferase II;Branched-chain aminotransferase;Glycosyl transferase, family 14;
A0A0P0W9T8.1	Single-copy	134	284.028	49.6179	32.734		Os04g0390301 protein			Q9AV47.1(68.4);Q653H7.1(33.3);Q7XKK6.3(32.6);Q6K223.1(25.4);Q6YVY0.1(21.5);Q0JCZ4.1(20.2);Q2QQX6.1(19.1);Q5JK20.1(18.3);Q653U3.1(18.0);A3B9A0.1(18.0);	AUX/IAA domain;Auxin response factor;B3 DNA binding domain;DNA-binding pseudobarrel domain superfamily;PB1 domain;
C7J0A6.1	Single-copy	111	421.359	45.2243	32.6325		Os03g0323350 protein	Glycoside hydrolase family 1;Glycoside hydrolase superfamily;		A3BMZ5.1(96.2);Q5QMT0.1(64.8);Q2QSR8.2(53.5);Q75I94.1(51.6);Q75I93.1(51.2);Q7XKV2.2(43.8);Q7XKV5.2(42.2);Q7F9K4.1(41.9);Q7XKV4.2(41.2);Q0DA21.2(40.2);	Glycoside hydrolase family 1;Glycoside hydrolase superfamily;Glycosyl hydrolases family 1, N-terminal conserved site;
A0A0P0X658.1	Single-copy	103	56.7596	73.0165	32.628		Os07g0510300 protein			Q2QSX3.1(48.6);A0A0P0XT43.1(14.5);A0A0P0VGQ8.1(13.1);	Achaete-scute transcription factor-related;Endonuclease/exonuclease/phosphatase;Endonuclease/exonuclease/phosphatase superfamily;Helix-loop-helix DNA-binding domain superfamily;Protein unc-13 homologue;Zinc finger, RanBP2-type;Zinc finger, RanBP2-type superfamily;
A0A0P0Y6D9.1	Homologous	100	161.176	56.279	32.6028	A0A0P0XDX2.1(65.8);	RT_RNaseH_2 domain-containing protein	Reverse transcriptase/retrotransposon-derived protein, RNase H-like domain;		A0A0N7KKH0.1(60.2);A0A0P0YB17.1(49.2);	Aspartic peptidase domain superfamily;Aspartic peptidase, active site;Chromo-like domain superfamily;Integrase zinc-binding domain;Integrase, catalytic core;Retrotransposon gag domain;Reverse transcriptase domain;Reverse transcriptase, RNase H-like domain;Ribonuclease H superfamily;Ribonuclease H-like superfamily;Zinc finger, CCHC-type;Zinc finger, CCHC-type superfamily;
A0A0P0VRW6.1	Single-copy	139	128.345	59.2252	32.5975		Os02g0833100 protein			A0A0P0XQP1.1(51.3);Q10PY7.1(26.4);A0A0P0VC55.1(24.1);A0A0P0Y6K7.1(23.4);Q8S6Q1.2(18.3);Q6EP85.1(12.5);	Multi antimicrobial extrusion protein;
A0A0P0XE18.1	Homologous	129	34.3142	99.2233	32.5621	A0A0P0Y812.1(117.8);	Os08g0272800 protein			Q5VML3.1(14.2);Q7XUV4.2(13.6);A0A0P0W7X0.1(12.5);Q2QWV0.1(12.0);	Chloramphenicol acetyltransferase-like domain superfamily;DYW domain;PSRP-3/Ycf65 superfamily;Pentatricopeptide repeat;Ribosomal protein PSRP-3/Ycf65;Tetratricopeptide-like helical domain superfamily;Transferase;UDP-glucuronosyl/UDP-glucosyltransferase;
A0A0P0WKC5.1	Single-copy	122	58.3621	72.3262	32.5599		Os05g0304450 protein			Q336U8.2(43.7);	Ski3/TTC37;Tetratricopeptide repeat;Tetratricopeptide repeat 2;Tetratricopeptide repeat-containing domain;Tetratricopeptide-like helical domain superfamily;
A0A0P0V4C1.1	Homologous	120	62.1447	70.9292	32.5149	Q8H5I5.1(39.8);	Os01g0563350 protein			Q9AQW1.1(42.8);Q0JLN8.1(13.1);	Domain of unknown function DUF630;Domain of unknown function DUF632;Nitrate regulatory gene2 protein;
Q2QSI7.1	Single-copy	93	36.685	90.2806	32.419		Os12g0427500 protein			Q10F62.1(14.8);Q6K8B0.1(13.9);	Invertase/pectin methylesterase inhibitor domain superfamily;Pectin lyase fold;Pectin lyase fold/virulence factor;Pectinesterase inhibitor domain;Pectinesterase, Asp active site;Pectinesterase, Tyr active site;Pectinesterase, catalytic;Phosphomethylpyrimidine synthase;Phosphomethylpyrimidine synthase ThiC/5-hydroxybenzimidazole synthase BzaA/B;ThiC/Bza superfamily;
Q6Z2Q8.1	Single-copy	144	127.127	59.2535	32.3564		Os08g0371200 protein	Carotenoid oxygenase;		A0A0P0XLA9.1(95.2);A0A0P0WT80.1(56.4);Q5MBR6.1(17.2);Q9AV33.1(15.8);Q6YVJ0.1(15.1);	Carotenoid oxygenase;CcmE-like superfamily;CcmE/CycJ protein;
C7IWA6.1	Homologous	81	553.824	42.1667	32.25	A0A0P0V5W7.1(44.3);A0A0P0WPB5.1(40.7);	Os01g0651400 protein			Q8RZ61.1(119.9);A0A0N7KL21.1(93.8);A0A0P0WJ82.1(91.3);Q75IK2.1(90.0);Q9LHW0.1(88.8);A2ZVC7.1(88.7);Q0JPL8.1(87.4);Q5Z739.1(85.5);	GDSL lipase/esterase;GDSL lipase/esterase-like, plant;SGNH hydrolase superfamily;
A0A0P0Y582.1	Single-copy	117	60.106	71.4427	32.2172		Os11g0622150 protein	Protein of unknown function DUF674;		Q7XXM9.1(81.7);Q5ZD66.1(24.0);Q5ZD69.1(21.6);A0A0P0UY70.1(17.5);Q65XA5.1(16.5);A0A0P0UYI1.1(15.7);A0A0P0WE75.1(15.5);	Protein of unknown function DUF674;
Q67J26.1	Homologous	98	407.211	45.4214	32.115	Q67J27.1(107.9);A0A0P0VYA3.1(63.5);Q0JNL7.1(58.1);Q0JNS6.2(56.8);Q6F332.3(56.7);Q8RYJ8.1(39.3);	Os09g0458900 protein	EF-hand domain pair;EF-Hand 1, calcium-binding site;EF-hand domain;		Q9FXQ3.1(113.0);B9FKW9.1(100.3);A2ZVI7.1(95.1);Q6I587.1(94.6);Q5VQQ5.1(94.1);	EF-Hand 1, calcium-binding site;EF-hand domain;EF-hand domain pair;Protein kinase domain;Protein kinase, ATP binding site;Protein kinase-like domain superfamily;Serine/threonine-protein kinase, active site;
C7J5D0.1	Single-copy	80	35.179	93.0362	31.9839		Os07g0539950 protein			Q7XU07.2(14.5);Q8H4L0.2(13.7);	Helix hairpin bin domain superfamily;NOSIC;Nop domain;Nop domain superfamily;Nop, C-terminal domain;Prp31 C-terminal;U4/U6 small nuclear ribonucleoprotein Prp31;
A0A0P0WM02.1	Single-copy	149	32.4324	112.644	31.9827		Os05g0397100 protein			A0A0P0X610.1(15.6);Q60EM7.1(14.4);	Homeobox KN domain;Homeobox domain;Homeobox-like domain superfamily;POX domain;Tetratricopeptide repeat;Tetratricopeptide repeat-containing domain;Tetratricopeptide-like helical domain superfamily;
A0A0P0V6V9.1	Single-copy	83	51.4374	74.9651	31.9754		Os01g0693700 protein			Q6ZHH7.1(19.6);P16081.3(14.4);	Cytochrome b5, heme-binding site;Cytochrome b5-like heme/steroid binding domain;Cytochrome b5-like heme/steroid binding domain superfamily;Eukaryotic molybdopterin oxidoreductase;FAD-binding domain, ferredoxin reductase-type;Ferredoxin-NADP reductase (FNR), nucleotide-binding domain;Flavoprotein pyridine nucleotide cytochrome reductase;Flavoprotein pyridine nucleotide cytochrome reductase-like, F…
A0A0P0W8Z7.1	Homologous	122	317.981	48.0639	31.9018	A0A0P0VWZ7.1(233.0);A0A0N7KLG5.1(64.3);	ANK_REP_REGION domain-containing protein	Ankyrin repeat;Ankyrin repeat-containing domain;Ankyrin repeat-containing domain superfamily;		A0A0P0Y0M4.1(49.6);Q69IQ0.1(48.6);Q2QML4.1(46.9);A2CIR5.1(45.7);Q0J407.1(45.1);Q10N66.1(41.3);Q69IU6.1(40.6);Q65XV2.1(40.1);Q8H8W7.1(39.3);Q10NB7.1(39.1);	Ankyrin repeat;Ankyrin repeat-containing domain;Ankyrin repeat-containing domain superfamily;PGG domain;Tetratricopeptide repeat;Tetratricopeptide repeat 1;Tetratricopeptide repeat-containing domain;Tetratricopeptide-like helical domain superfamily;Zinc finger, RING-type;Zinc finger, RING/FYVE/PHD-type;
A0A0P0VWZ7.1	Homologous	122	317.981	48.0426	31.8406	A0A0P0W8Z7.1(233.0);A0A0N7KLG5.1(63.4);	ANK_REP_REGION domain-containing protein	Ankyrin repeat;Ankyrin repeat-containing domain;Ankyrin repeat-containing domain superfamily;		A0A0P0Y0M4.1(49.6);Q69IQ0.1(48.6);Q2QML4.1(46.9);A2CIR5.1(45.7);Q0J407.1(45.1);Q10N66.1(41.3);Q69IU6.1(40.6);Q65XV2.1(40.1);Q8H8W7.1(39.3);Q10NB7.1(39.1);	Ankyrin repeat;Ankyrin repeat-containing domain;Ankyrin repeat-containing domain superfamily;PGG domain;Tetratricopeptide repeat;Tetratricopeptide repeat 1;Tetratricopeptide repeat-containing domain;Tetratricopeptide-like helical domain superfamily;Zinc finger, RING-type;Zinc finger, RING/FYVE/PHD-type;
A0A0P0X2E3.1	Single-copy	95	41.276	82.1537	31.834		Os07g0137700 protein			Q6ZBS8.1(14.3);A3ACF3.1(13.5);Q69IP6.1(11.2);	Adenylyltransferase and sulfurtransferase MOCS3/Uba4;Aspartic peptidase A1 family;Aspartic peptidase domain superfamily;Basic-leucine zipper domain;Pepsin-like domain, plant;Peptidase family A1 domain;Rhodanese-like domain;Rhodanese-like domain superfamily;THIF-type NAD/FAD binding fold;Transcription factor TGA like domain;Ubiquitin-activating enzyme;Xylanase inhibitor, C-terminal;Xylanase inhibi…
A0A0P0W543.1	Single-copy	73	32.8654	103.636	31.7659		Os03g0826900 protein			Q6Z5M3.1(14.5);Q2R447.1(10.4);	Cytochrome P450;Cytochrome P450 superfamily;Cytochrome P450, E-class, group I;Cytochrome P450, conserved site;Glycosyltransferase 34;Nucleotide-diphospho-sugar transferases;
Q0DES3.1	Single-copy	124	101.644	62.1048	31.7406		NET domain-containing protein			A3A538.1(33.6);A0A0N7KJQ5.1(29.5);Q7X637.2(27.7);Q6Z1C1.1(23.1);Q6K5G2.1(15.0);	Bromodomain;Bromodomain-like superfamily;NET domain;NET domain superfamily;Putative transcription factor GTE, bromodomain;
A0A0P0W680.1	Homologous	116	81.711	65.4586	31.7347	A0A0P0UY30.1(123.2);A0A0P0Y6J5.1(44.4);	Os04g0117000 protein			A0A0P0UYZ2.1(74.8);	Reverse transcriptase domain;Reverse transcriptase zinc-binding domain;
Q7XNQ1.1	Single-copy	85	46.5148	77.6282	31.7215		OSJNBb0089B03.10 protein			Q5Z8D9.1(15.2);Q7XCU9.2(13.5);Q8H2J9.3(10.7);	6-phosphogluconate dehydrogenase, domain 2;6-phosphogluconate dehydrogenase-like, C-terminal domain superfamily;Cytochrome P450;Cytochrome P450 superfamily;Cytochrome P450, E-class, group I;Cytochrome P450, conserved site;Glycerol-3-phosphate dehydrogenase, NAD-dependent;Glycerol-3-phosphate dehydrogenase, NAD-dependent, C-terminal;Glycerol-3-phosphate dehydrogenase, NAD-dependent, N-terminal;Gly…
A0A0P0WV25.1	Homologous	147	558.392	41.8789	31.646	B9G494.1(160.0);	PBPe domain-containing protein			Q69NA4.1(68.4);Q6K4P7.1(68.3);A0A0P0XNE5.1(66.9);A0A0P0XLY5.1(66.7);Q69KK7.1(65.5);Q69KL0.1(63.9);Q69L07.1(62.2);Q69L11.1(58.4);B9G3Q7.1(57.7);A0A0N7KLP1.1(53.6);	GPCR, family 3;Ionotropic glutamate receptor;Ionotropic glutamate receptor, plant;Leucine-binding protein domain;Periplasmic binding protein-like I;Receptor, ligand binding region;Solute-binding protein family 3/N-terminal domain of MltF;
A0A0P0W375.1	Single-copy	131	56.666	72.3481	31.6442		Os03g0733332 protein			Q5JM36.1(52.5);A0A0P0V3H5.1(29.3);	Tetratricopeptide repeat;Tetratricopeptide repeat-containing domain;Tetratricopeptide-like helical domain superfamily;
A0A0P0YAK4.1	Homologous	143	48.3607	76.3252	31.5824	A0A0P0XFK7.1(104.5);Q0DFN9.1(103.0);	Os12g0501900 protein			Q2R1K9.1(37.2);Q6EQX3.1(13.7);	MEI2-like, RNA recognition motif 1;MEI2-like, RNA recognition motif 3;Mei2/Mei2-like, C-terminal RNA recognition motif;Nucleotide-binding alpha-beta plait domain superfamily;Putative S-adenosyl-L-methionine-dependent methyltransferase;RNA recognition motif domain;RNA-binding domain superfamily;S-adenosyl-L-methionine-dependent methyltransferase;
A0A0P0Y6V2.1	Single-copy	86	34.0413	95.4953	31.5748		Os12g0143950 protein			B9F0R9.1(13.7);Q6ZH94.1(13.3);	Isoprenoid synthase domain superfamily;Protein BREAKING OF ASYMMETRY IN THE STOMATAL LINEAGE;Terpene cyclase-like 1, C-terminal domain;Terpene synthase, N-terminal domain;Terpene synthase, N-terminal domain superfamily;Terpene synthase, metal-binding domain;Terpenoid cyclases/protein prenyltransferase alpha-alpha toroid;
A0A0N7KII7.1	Single-copy	106	101.847	61.9943	31.5628		Os04g0134701 protein	Concanavalin A-like lectin/glucanase domain superfamily;		Q0JF98.1(36.2);A0A0P0W774.1(31.7);Q0JF65.1(23.4);	Concanavalin A-like lectin/glucanase domain superfamily;Legume lectin domain;Legume lectin, beta chain, Mn/Ca-binding site;Protein kinase domain;Protein kinase, ATP binding site;Protein kinase-like domain superfamily;Serine/threonine-protein kinase, active site;
A0A0P0WU96.1	Single-copy	71	31.5744	136.47	31.5334		Os06g0207950 protein			Q7XD65.1(28.9);Q7XD66.1(18.3);Q5Z8V2.1(10.0);	EGF-like calcium-binding domain;EGF-like calcium-binding, conserved site;EGF-like domain;EGF-type aspartate/asparagine hydroxylation site;Kiwellin-like;Protein kinase domain;Protein kinase, ATP binding site;Protein kinase-like domain superfamily;RlpA-like domain superfamily;Serine-threonine/tyrosine-protein kinase, catalytic domain;Serine/threonine-protein kinase, active site;Wall-associated rece…
A2ZWR3.1	Single-copy	134	198.006	53.3553	31.5152		GUB_WAK_bind domain-containing protein	Wall-associated receptor kinase, galacturonan-binding domain;		A0A0P0WPZ5.1(78.6);Q5N7Q7.1(68.2);Q8S008.1(37.7);Q5ZC64.1(25.5);Q5ZC57.1(18.9);Q5ZC55.1(18.0);	Protein kinase domain;Protein kinase, ATP binding site;Protein kinase-like domain superfamily;Serine-threonine/tyrosine-protein kinase, catalytic domain;Serine/threonine-protein kinase, active site;Wall-associated receptor kinase, C-terminal;Wall-associated receptor kinase, galacturonan-binding domain;
A0A0P0XZF1.1	Single-copy	79	33.6494	96.8937	31.5091		Os11g0166201 protein			Q0JMH0.3(13.2);Q67U60.1(10.4);	Alpha/Beta hydrolase fold;DHS-like NAD/FAD-binding domain superfamily;Lecithin:cholesterol/phospholipid:diacylglycerol acyltransferase;TPP-binding enzyme, conserved site;Thiamin diphosphate-binding fold;Thiamine pyrophosphate enzyme, C-terminal TPP-binding;Thiamine pyrophosphate enzyme, N-terminal TPP-binding domain;Thiamine pyrophosphate enzyme, central domain;
Q5SMU9.1	Homologous	75	320.319	47.8267	31.4569	B9GCI6.1(95.8);A0A0N7KTS5.1(93.8);	Os06g0186800 protein	Protein of unknown function DUF247, plant;		B9F4U3.1(73.6);Q10MF5.1(45.7);Q60E19.1(45.3);A0A0P0V1U0.1(40.8);C7J661.1(37.3);Q7XKP8.1(33.3);A0A0P0XPY3.1(32.9);Q656Q9.1(30.6);	Protein of unknown function DUF247, plant;
A0A0P0VN02.1	Single-copy	73	31.4943	130.651	31.4213		Os02g0683100 protein			A0A0P0WUZ0.1(15.1);A0A0P0Y4P1.1(13.7);	Adenylyl-sulfate kinase;Cytochrome P450;Cytochrome P450 superfamily;Cytochrome P450, E-class, group I;Cytochrome P450, conserved site;P-loop containing nucleoside triphosphate hydrolase;
C7J5K1.1	Single-copy	70	339.718	47.16	31.4093		FMN_dh domain-containing protein			Q10CE4.1(100.7);Q6YT73.1(97.4);Q7FAS1.1(86.9);Q7XPR4.3(71.0);Q8H3I4.2(56.3);	Aldolase-type TIM barrel;Alpha-hydroxy acid dehydrogenase, FMN-dependent;FMN hydroxy acid dehydrogenase domain;FMN-dependent alpha-hydroxy acid dehydrogenase, active site;FMN-dependent dehydrogenase;
A0A0P0VP82.1	Single-copy	129	60.0696	70.9155	31.4087		Os02g0734667 protein	Uncharacterized protein At1g65710-like;		Q7XUM1.2(73.5);	Uncharacterized protein At1g65710-like;
A0A0N7KCD9.1	Single-copy	49	33.7561	95.6898	31.3539		Os01g0163616 protein			Q6Z134.1(13.1);Q2QM36.1(11.2);	Glycosyl transferase, family 14;
A0A0P0WXT5.1	Single-copy	98	31.6294	115.811	31.3086		Os06g0536200 protein			Q6ZFM2.1(14.7);Q5JL24.1(14.3);A0A0N7KQM0.1(12.1);	MFS transporter superfamily;Major facilitator, sugar transporter-like;Papain-like cysteine peptidase superfamily;Peptidase C19, ubiquitin carboxyl-terminal hydrolase;Protein of unknown function PDDEXK-like;Ubiquitin specific protease domain;
A0A0P0Y4B5.1	Single-copy	111	128.548	58.6396	31.2434		Thymidylat_synt domain-containing protein			Q2R481.1(97.2);Q2QRX6.2(85.5);	Bifunctional dihydrofolate reductase/thymidylate synthase;Dihydrofolate reductase conserved site;Dihydrofolate reductase domain;Dihydrofolate reductase-like domain superfamily;Thymidylate synthase;Thymidylate synthase, active site;Thymidylate synthase/dCMP hydroxymethylase domain;Thymidylate synthase/dCMP hydroxymethylase superfamily;
A0A0P0WQK7.1	Single-copy	94	34.7062	91.9968	31.2432		CCHC-type domain-containing protein	Zinc finger, CCHC-type;Zinc finger, CCHC-type superfamily;		Q6F3B9.1(16.3);A0A0P0YB17.1(11.9);	Aspartic peptidase domain superfamily;Aspartic peptidase, active site;Integrase zinc-binding domain;Integrase, catalytic core;Retrotransposon gag domain;Reverse transcriptase domain;Reverse transcriptase, RNase H-like domain;Ribonuclease H superfamily;Ribonuclease H-like superfamily;Zinc finger, CCHC-type;Zinc finger, CCHC-type superfamily;Zinc finger, GRF-type;
C7J250.1	Single-copy	93	187.08	53.8849	31.1263		HTH myb-type domain-containing protein	Homeobox-like domain superfamily;Myb domain;SANT/Myb domain;		Q4JL76.1(59.7);Q53NK6.1(59.1);Q0D3F9.1(44.7);Q0JHU7.1(42.1);Q10MB4.1(39.5);A0A0P0WCH5.1(38.7);Q6K949.1(34.7);Q2QZJ8.1(32.8);	Homeobox-like domain superfamily;Myb domain;Myb-like transcription factor;SANT/Myb domain;
A0A0P0WPB5.1	Homologous	73	613.276	40.6973	31.0791	A0A0P0V5W7.1(47.8);C7IWA6.1(42.9);	Os05g0506450 protein			Q8RZ61.1(119.9);A0A0N7KL21.1(93.8);A0A0P0WJ82.1(91.3);Q75IK2.1(90.0);Q9LHW0.1(88.8);A2ZVC7.1(88.7);Q0JPL8.1(87.4);Q5Z739.1(85.5);	GDSL lipase/esterase;GDSL lipase/esterase-like, plant;SGNH hydrolase superfamily;
A0A0P0Y2M7.1	Homologous	63	42.2397	80.1524	31.0058	A0A0P0XXT8.1(78.1);A0A0P0Y5D9.1(71.9);A0A0P0Y5L9.1(71.6);A0A0P0W867.1(65.5);B9F8L6.1(43.1);A0A0P0Y5G0.1(36.2);	Os11g0506400 protein			Q6F3A6.1(14.9);A2ZVI7.1(14.3);	EF-Hand 1, calcium-binding site;EF-hand domain;EF-hand domain pair;Protein kinase domain;Protein kinase, ATP binding site;Protein kinase-like domain superfamily;Serine/threonine-protein kinase, active site;
A0A0P0UZS3.1	Single-copy	94	33.7592	94.0681	30.9688		Os01g0224166 protein			Q94GN4.1(15.9);Q10LF7.1(15.1);	Circularly permuted (CP)-type guanine nucleotide-binding (G) domain;GTP binding domain;GTP-binding protein, orthogonal bundle domain superfamily;Nucleolar GTP-binding protein 2;Nucleolar GTP-binding protein 2, N-terminal domain;P-loop containing nucleoside triphosphate hydrolase;Protein kinase domain;Protein kinase-like domain superfamily;Serine-threonine/tyrosine-protein kinase, catalytic domain…
A0A0P0WZ93.1	Single-copy	87	33.8897	93.5356	30.9486		Os06g0647150 protein			Q2QT07.2(13.8);A0A0P0XT43.1(13.7);	AAA+ ATPase domain;ABC transporter, conserved site;ABC transporter-like;ABC-2 type transporter;P-loop containing nucleoside triphosphate hydrolase;Protein unc-13 homologue;
A0A0P0VSU5.1	Single-copy	129	31.0464	126.194	30.9342		Os03g0134600 protein			P43279.2(13.2);Q6ZCS7.1(12.9);	Domain unknown function DUF295;F-box domain;F-box-like domain superfamily;Malic enzyme, N-terminal domain;Malic enzyme, N-terminal domain superfamily;Malic enzyme, NAD-binding;Malic enzyme, conserved site;Malic oxidoreductase;NAD(P)-binding domain superfamily;
A0A0P0WZH3.1	Homologous	104	637.44	40.2231	30.8801	Q0JBH9.1(36.5);Q6H7E3.1(36.1);Q7XPW6.2(35.0);	C2 domain-containing protein	C2 domain;C2 domain superfamily;		Q8H2Q5.1(95.4);Q7XPV3.1(76.3);Q60EW9.1(69.5);Q69T22.2(68.3);Q7XKA3.2(64.7);Q6ETC4.1(62.7);Q69JE2.1(60.8);Q6Z7A3.1(59.6);	C2 domain;C2 domain superfamily;GRAM domain;PH-like domain superfamily;Phosphoribosyltransferase C-terminal;Synaptotagmin, SMP domain;Synaptotagmin-like mitochondrial-lipid-binding domain;VASt domain;
B9F5U5.1	Single-copy	77	34.7714	90.5623	30.8275		Os03g0762800 protein			Q6K1X6.1(14.0);Q6ASU6.1(12.3);Q0D564.1(11.8);	5-formyltetrahydrofolate cyclo-ligase;5-formyltetrahydrofolate cyclo-ligase-like domain superfamily;Calcium load-activated calcium channel;GDSL lipase/esterase;GDSL lipase/esterase-like, plant;Integral membrane protein EMC3/TMCO1-like;NagB/RpiA transferase-like;SGNH hydrolase superfamily;
A0A0N7KCR1.1	Homologous	88	31.1212	116.42	30.8241	A0A0P0VVM2.1(44.0);A0A0P0V5X0.1(44.0);	Os01g0273250 protein			Q8L4S1.1(11.8);Q6YU81.1(10.0);	Pentacotripeptide-repeat region of PRORP;Pentatricopeptide repeat;Ribosomal protein S5;Ribosomal protein S5 domain 2-type fold;Ribosomal protein S5 domain 2-type fold, subgroup;Ribosomal protein S5, C-terminal;Ribosomal protein S5, N-terminal;Tetratricopeptide-like helical domain superfamily;
Q6I5K3.1	Single-copy	83	91.2232	63.2614	30.8		Os05g0464200 protein			Q69IX0.1(17.9);Q6AVT7.1(15.5);Q0J3H7.1(15.2);Q8H4K0.1(15.1);Q67V82.1(14.5);Q7XD86.2(13.0);Q67V36.1(12.7);A0A0P0XEP7.1(11.7);	Chloramphenicol acetyltransferase-like domain superfamily;Cyclin;Cyclin, N-terminal;Cyclin-like;Cyclin-like superfamily;Protein of unknown function DUF247, plant;Protein of unknown function DUF3537;Protein of unknown function DUF4228, plant;Retrieval of early ER protein Rer1;Ribosomal protein L7/L12;Ribosomal protein L7/L12, C-terminal;Ribosomal protein L7/L12, C-terminal/adaptor protein ClpS-lik…
A0A0P0X3D4.1	Single-copy	141	32.9247	95.761	30.5972		Os07g0194950 protein			A0A0P0XMD7.1(13.4);Q5W6F7.1(12.4);A0A0P0V0T6.1(10.6);	Armadillo-type fold;Ascorbate oxidase, third cupredoxin domain;Cupredoxin;L-ascorbate oxidase, plants;Multicopper oxidase, copper-binding site;Multicopper oxidase, type 1;Multicopper oxidase, type 2;Multicopper oxidase, type 3;Multicopper oxidases, conserved site;Protein kinase domain;Protein kinase, ATP binding site;Protein kinase-like domain superfamily;Quinoprotein alcohol dehydrogenase-like s…
B7F990.1	Single-copy	124	87.1156	63.829	30.529		Os08g0470000 protein			Q84TX8.1(73.5);Q7X616.1(25.6);	EngB-type guanine nucleotide-binding (G) domain;GTP binding domain;GTP-binding protein, ribosome biogenesis, YsxC;Leucine-rich repeat domain superfamily;Leucine-rich repeat, typical subtype;Leucine-rich repeat-containing N-terminal, plant-type;P-loop containing nucleoside triphosphate hydrolase;Protein kinase domain;Protein kinase, ATP binding site;Protein kinase-like domain superfamily;Serine-th…
A0A0P0WNY8.1	Single-copy	90	69.5872	67.5267	30.5126		Os05g0487801 protein			P0C1U5.1(50.6);Q6ZI82.1(12.8);	Glycoside hydrolase family 9;Glycoside hydrolase family 9, His active site;Six-hairpin glycosidase superfamily;Six-hairpin glycosidase-like superfamily;T-complex 11;
Q6YYK2.1	Homologous	144	33.8476	92.1028	30.5024	Q6YYK0.1(75.5);	Os08g0171900 protein			Q8L4S1.1(16.1);Q2R4X7.1(12.9);Q84PB7.1(10.6);	Pentacotripeptide-repeat region of PRORP;Pentatricopeptide repeat;Protein Thf1;Tetratricopeptide-like helical domain superfamily;UDP-glucuronosyl/UDP-glucosyltransferase;
A0A0P0X4Y9.1	Single-copy	87	420.924	44.4586	30.3693		Fatty acyl-CoA reductase	Fatty acyl-CoA reductase;Male sterility, NAD-binding;NAD(P)-binding domain superfamily;		Q7XRZ6.2(75.7);Q7XS02.2(74.0);Q6ZJ06.1(73.6);B7F9S3.1(67.7);A0A0N7KNG3.1(67.2);Q0IZI9.1(61.1);Q8S7T9.1(47.5);	Fatty acyl-CoA reductase;Fatty acyl-CoA reductase, C-terminal;Male sterility, NAD-binding;NAD(P)-binding domain superfamily;
A0A0P0W0H0.1	Single-copy	82	67.7254	67.878	30.2834		Os03g0593400 protein			A0A0P0W5W4.1(37.5);Q10RY0.1(14.0);	VWA-Hint protein, Vwaint domain;Zinc finger, RING-type;Zinc finger, RING/FYVE/PHD-type;von Willebrand factor A-like domain superfamily;von Willebrand factor, type A;
A0A0P0Y9M5.1	Single-copy	116	33.0172	93.8776	30.2401		Os12g0428700 protein			A0A0P0WNX5.1(17.6);Q53PU2.1(13.5);Q7XIR7.1(10.4);	Cullin repeat-like-containing domain superfamily;E3 ubiquitin-protein ligase RNF126-like, zinc-ribbon;Exocyst complex component Exo70;FLC EXPRESSOR/FLX-like;Zinc finger, RING-type;Zinc finger, RING/FYVE/PHD-type;
Q94DX8.1	Homologous	118	32.4509	96.1525	30.239	A8R3Q5.1(47.7);Q6Z6T2.1(34.6);	CLE family OsCLE104 protein	CLAVATA3/ESR (CLE)-related protein 9/10/11/12/13;		Q2QW44.3(16.1);Q8S7W9.1(12.5);A0A0P0WY66.1(10.6);	Helix-turn-helix motif;Homeobox domain;Homeobox, conserved site;Homeobox-like domain superfamily;Homeodomain, ZF-HD class;Leucine zipper, homeobox-associated;VWA-Hint protein, Vwaint domain;ZF-HD homeobox protein, Cys/His-rich dimerisation domain;von Willebrand factor A-like domain superfamily;von Willebrand factor, type A;
B7E9R9.1	Single-copy	130	205.697	52.3954	30.1825		Os07g0541600 protein			A0A0P0VM16.1(50.3);A0A0P0V1C5.1(48.1);A0A0P0WMZ6.1(48.0);A0A0P0WFD5.1(47.5);A0A0P0W939.1(45.5);A0A0P0VAC7.1(42.4);	FAR1 DNA binding domain;FHY3/FAR1 family;MULE transposase domain;Zinc finger, PMZ-type;Zinc finger, SWIM-type;
A0A0P0WG39.1	Single-copy	80	50.9628	73.715	30.1609		Os04g0671500 protein			Q2QQV7.1(14.0);A0A0P0XTA0.1(12.9);Q0J949.1(10.4);	Domain of unknown function DUF4283;Leucine-rich repeat domain superfamily;NB-ARC;P-loop containing nucleoside triphosphate hydrolase;Poly(ADP-ribose) polymerase, catalytic domain;RST domain of plant C-terminal;Rx, N-terminal;Uncharacterized protein At4g02000-like;Zinc knuckle CX2CX4HX4C;
A0A0P0XHQ8.1	Homologous	64	119.711	59.0156	29.9316	A0A0P0W440.1(30.4);	Os08g0505250 protein			A0A0P0XD22.1(89.3);	HAT, C-terminal dimerisation domain;Ribonuclease H-like superfamily;Zinc finger C2H2 superfamily;Zinc finger, BED-type;hAT-like transposase, RNase-H fold;
A0A0P0W792.1	Single-copy	140	71.9451	66.5843	29.888		Os04g0181901 protein	Isopenicillin N synthase-like;		Q7XXC4.2(64.4);Q656N1.1(31.2);Q6ZBG4.1(30.8);Q8GSY5.1(19.6);Q6EPA2.1(17.9);Q5QLC8.1(17.8);	Isopenicillin N synthase-like;Non-haem dioxygenase N-terminal domain;Oxoglutarate/iron-dependent dioxygenase;Plastid division protein PDV1/PDV2;
Q5TKK0.1	Homologous	102	178.991	53.9265	29.8838	Q5TKK1.1(170.0);Q5TKK2.1(122.3);Q7F2X8.1(58.3);B7F8B0.1(49.5);A0A0P0WAK6.1(47.6);Q6ZKI2.1(35.0);Q84ZB9.1(33.6);	RRM domain-containing protein	Nucleotide-binding alpha-beta plait domain superfamily;RNA-binding domain superfamily;RNA recognition motif domain;		Q75LJ7.1(115.9);Q0DB96.1(112.4);Q7XTT4.2(107.1);	NUCL, RNA recognition motif 1;Nucleotide-binding alpha-beta plait domain superfamily;PABC (PABP) domain;Polyadenylate-binding protein/Hyperplastic disc protein;RNA recognition motif domain;RNA-binding domain superfamily;Zinc finger, CCHC-type;Zinc finger, CCHC-type superfamily;
C7J563.1	Single-copy	106	43.2765	77.9896	29.8501		Os07g0297200 protein			Q67UT1.1(12.7);Q75IM9.2(12.5);Q6Z3A3.1(11.5);Q60EA3.1(10.5);	Acyl-CoA dehydrogenase, conserved site;Acyl-CoA dehydrogenase-like, C-terminal;Acyl-CoA dehydrogenase/oxidase C-terminal;Acyl-CoA dehydrogenase/oxidase, N-terminal;Acyl-CoA dehydrogenase/oxidase, N-terminal and middle domain superfamily;Acyl-CoA dehydrogenase/oxidase, N-terminal domain superfamily;Acyl-CoA oxidase/dehydrogenase, central domain;Glutamate--cysteine ligase, GCS2;Glutamate--cysteine …
Q10PJ9.1	Homologous	119	47.5233	75.1857	29.7883	A0A0P0VJZ5.1(77.4);	Expressed protein	Protein SHORT HYPOCOTYL IN WHITE LIGHT 1;		A0A0P0W0I2.1(14.3);Q6Z0Z0.1(11.8);Q6Z3Y9.1(11.4);	Armadillo-type fold;C2 domain;C2 domain superfamily;DNA polymerase V/Myb-binding protein 1A;PLC-like phosphodiesterase, TIM beta/alpha-barrel domain superfamily;Phosphatidylinositol-specific phospholipase C, X domain;Phosphoinositide phospholipase C family;Phosphoinositide phospholipase C, plant;Phospholipase C, phosphatidylinositol-specific, Y domain;Protein of unknown function DUF247, plant;
A0A0P0WM90.1	Single-copy	83	140.34	56.8494	29.7018		Os05g0408132 protein			Q2R5M5.1(28.7);Q7XQF8.2(20.4);Q5ZA49.1(17.5);Q7XT17.2(17.3);Q5ZA47.1(16.9);A0A0P0WVX6.1(15.0);Q5ZA41.1(14.6);Q75HY2.1(13.1);Q651M9.1(10.7);	Alpha/Beta hydrolase fold;BAG domain;BAG domain superfamily;Molecular chaperone regulator BAG;NAD(P)-binding domain superfamily;Peptidase S10, serine carboxypeptidase;Serine carboxypeptidase, serine active site;Short-chain dehydrogenase/reductase SDR;Short-chain dehydrogenase/reductase, conserved site;Ubiquitin domain;Ubiquitin-like domain superfamily;
A0A0P0VZC0.1	Homologous	101	251.883	49.8396	29.6035	Q67X24.1(35.1);A3B8T3.1(30.9);C7J408.1(30.4);P0C5C6.1(30.2);	Os03g0399900 protein			Q6K4U3.1(119.3);Q33B84.1(109.0);Q6L4X6.1(102.6);A0A0P0W726.1(62.4);A0A0N7KSH4.1(47.2);A0A0P0W6B6.1(44.6);	Jacalin-like lectin domain;Jacalin-like lectin domain superfamily;Jacalin-like lectin domain, plant;Leucine-rich repeat domain superfamily;NB-ARC;P-loop containing nucleoside triphosphate hydrolase;Rx, N-terminal;Virus X resistance protein-like, coiled-coil domain;
A0A0P0YBV3.1	Single-copy	95	47.0828	75.2463	29.5788		Os12g0590066 protein			Q6Z921.1(33.6);	26S proteasome regulatory complex, non-ATPase subcomplex, Rpn2/Psmd1 subunit;26S proteasome regulatory subunit RPN2, C-terminal;Armadillo-like helical;Armadillo-type fold;Proteasome/cyclosome repeat;
C7J1S2.1	Single-copy	118	97.1976	61.7297	29.5746		Os04g0583800 protein	Nucleotide-binding alpha-beta plait domain superfamily;RNA-binding domain superfamily;		Q84ZR9.2(35.6);Q2R0P4.2(32.3);Q6YVH3.1(29.7);Q7XDI5.1(25.0);Q8H8G8.1(22.3);	DAZ-associated protein 1, RNA recognition motif 2;HRP1, RNA recognition motif 2;Nucleotide-binding alpha-beta plait domain superfamily;PHIP1, RNA recognition motif 1;RNA recognition motif domain;RNA-binding domain superfamily;
A0A0P0Y9W0.1	Single-copy	128	232.366	50.7398	29.5551		Os12g0466950 protein			Q2QRB9.1(36.8);A0A0P0Y630.1(31.7);Q2QZJ7.1(29.7);Q2QPV5.1(28.2);Q9MBF2.1(27.9);Q6Z011.1(27.7);	Leucine-rich repeat;Leucine-rich repeat domain superfamily;NB-ARC;P-loop containing nucleoside triphosphate hydrolase;Rx, N-terminal;Virus X resistance protein-like, coiled-coil domain;
A0A0P0W5K9.1	Single-copy	122	65.374	68.0033	29.4345		Os03g0849800 protein			Q8RUF2.1(23.8);A0A0P0XJF6.1(20.1);A0A0N7KEB3.1(18.3);A0A0P0VC55.1(17.6);Q9FP29.1(12.0);A0A0P0VP92.1(10.9);	Armadillo-like helical;Armadillo-type fold;ELK domain;Homeobox KN domain;Homeobox domain;Homeobox, conserved site;Homeobox-like domain superfamily;KNOX1;KNOX2;MT-associated protein TORTIFOLIA1/SPIRAL2-like;Multi antimicrobial extrusion protein;Nucleotide-diphospho-sugar transferase;
A0A0P0W7X7.1	Single-copy	105	29.35	142.266	29.3287		Os04g0267950 protein			Q69W91.1(47.4);Q9XHY5.1(46.6);Q0D879.1(46.2);Q6YXC1.1(14.8);	Chlorophyll A-B binding protein;Papain-like cysteine peptidase superfamily;Peptidase C19, ubiquitin carboxyl-terminal hydrolase;Ubiquitin specific protease domain;Ubiquitin specific protease, conserved site;
A0A0P0VMN8.1	Homologous	107	141.108	56.6178	29.3226	A0A0P0X1C4.1(40.7);	Os02g0669500 protein			Q5Z978.1(58.5);Q5Z975.1(56.1);Q94GX3.1(53.4);Q5Z976.1(51.3);Q94GX4.1(48.3);Q7XCK8.1(45.2);A0A0N7KSG9.1(34.0);Q6Z3G7.1(33.4);Q6Z3G5.1(32.0);	Protein of unknown function DUF241, plant;
A0A0P0WMZ0.1	Single-copy	83	29.7319	111.934	29.2898		Os05g0440466 protein			Q94H83.1(21.3);	Chaperone J-domain superfamily;DnaJ domain;Domain of unknown function DUF3444;
A0A0P0V3I2.1	Single-copy	142	65.315	67.8493	29.1592		Os01g0528300 protein			Q650V6.1(30.0);Q650W1.1(28.2);Q0JDF7.1(25.8);Q10N17.1(21.5);Q6Z3Y3.1(20.2);	ACT domain;Prephenate dehydratase;Prephenate dehydratase, conserved site;
A0A0P0Y5J7.1	Single-copy	112	165.515	54.5376	29.0694		Os11g0681200 protein			A0A0P0Y4J8.1(33.7);Q2R115.1(32.7);Q7X8M3.2(24.3);Q7XEG4.1(22.9);Q8H3E5.1(22.8);A0A0P0WEY4.1(22.7);Q0J9Y3.1(22.5);A0A0P0XUU8.1(22.5);Q7XE76.1(21.5);	BPM, C-terminal;BTB/POZ domain;MATH/TRAF domain;SKP1/BTB/POZ domain superfamily;TRAF-like;
A0A0P0VCW1.1	Single-copy	72	443.621	43.4194	29.0546		Os01g0952950 protein			Q6YT77.1(52.1);Q0D699.1(42.4);Q0JA29.1(42.1);Q337M0.1(40.4);A0A0P0WIF5.1(38.0);A0A0P0WR41.1(35.9);Q5Z669.1(35.2);	Leucine-rich repeat;Leucine-rich repeat domain superfamily;Leucine-rich repeat, typical subtype;Leucine-rich repeat-containing N-terminal, plant-type;Protein kinase domain;Protein kinase, ATP binding site;Protein kinase-like domain superfamily;Serine-threonine/tyrosine-protein kinase, catalytic domain;Serine/threonine-protein kinase, active site;Tyrosine-protein kinase, active site;
A0A0P0W7B9.1	Single-copy	42	42.6615	77.581	29.0499		Os04g0170866 protein			Q94DE7.1(14.3);A0A0N7KT26.1(13.0);	Decaprenyl diphosphate synthase-like;Decaprenyl diphosphate synthase-like superfamily;Di-trans-poly-cis-decaprenylcistransferase-like, conserved site;Leucine-rich repeat domain superfamily;NB-ARC;P-loop containing nucleoside triphosphate hydrolase;Rx, N-terminal;
A0A0P0XH18.1	Single-copy	80	33.0425	89.6762	28.9901		Os08g0438801 protein			Q75LP7.1(14.3);Q60F24.1(13.1);	Gamma tubulin complex component protein, N-terminal;Gamma tubulin complex component, C-terminal;Gamma-tubulin complex component protein;Gamma-tubulin complex, C-terminal domain superfamily;Homeobox-like domain superfamily;Myb domain;Myb-like transcription factor;SANT/Myb domain;
A0A0N7KP24.1	Single-copy	112	30.115	102.443	28.9847		Os07g0679250 protein			Q6ZCD2.1(14.3);Q7XV05.1(13.3);	Chloramphenicol acetyltransferase-like domain superfamily;Leucine-rich repeat;Leucine-rich repeat domain superfamily;Leucine-rich repeat-containing N-terminal, plant-type;Protein kinase domain;Protein kinase, ATP binding site;Protein kinase-like domain superfamily;Serine/threonine-protein kinase, active site;Somatic embryogenesis receptor kinase;Transferase;
Q0JAE0.1	Single-copy	123	78.5375	64.6253	28.9627		Chromo domain-containing protein			A0A0N7KKH0.1(55.4);	Aspartic peptidase domain superfamily;Aspartic peptidase, active site;Chromo-like domain superfamily;Integrase zinc-binding domain;Integrase, catalytic core;Retrotransposon gag domain;Reverse transcriptase domain;Reverse transcriptase, RNase H-like domain;Ribonuclease H superfamily;Ribonuclease H-like superfamily;Zinc finger, CCHC-type;Zinc finger, CCHC-type superfamily;
A0A0P0V9K1.1	Single-copy	102	40.2356	79.3784	28.9159		Os01g0809800 protein	NSF attachment protein;		C7IXR9.1(58.1);Q8RUN4.1(29.3);Q75LK9.1(14.7);Q7XW72.2(13.5);Q6F353.1(10.2);	DNA methylase, N-6 adenine-specific, conserved site;DNA replication licensing factor Mcm6;MCM N-terminal domain;MCM OB domain;MCM domain;MCM, AAA-lid domain;Mcm6, C-terminal winged-helix domain;Methyltransferase EEF1AKMT1/ZCCHC4;Mini-chromosome maintenance protein;Mini-chromosome maintenance, conserved site;NSF attachment protein;Nucleic acid-binding, OB-fold;P-loop containing nucleoside triphosp…
A0A0N7KL76.1	Homologous	107	60.811	69.0056	28.895	A0A0N7KCF2.1(202.6);	Os05g0553500 protein			Q653S8.1(34.3);Q6ZIV0.1(23.3);A0A0P0VRM1.1(13.4);	E3 ubiquitin ligase RBR family;IBR domain;Protein of unknown function DUF1677, Oryza sativa;Zinc finger, RING-type;Zinc finger, RING-type, conserved site;Zinc finger, RING/FYVE/PHD-type;Zinc finger, RanBP2-type;Zinc finger, RanBP2-type superfamily;
Q0J555.1	Single-copy	109	34.7063	86.0138	28.8829		Os08g0465400 protein			Q8LIY8.1(16.0);Q2QZV8.1(13.8);	CALMODULIN-BINDING PROTEIN60;Carotenoid oxygenase;
A0A0P0Y3Z7.1	Homologous	142	379.423	44.9796	28.7281	A0A0P0XPW4.1(47.5);	Pectinesterase domain-containing protein	Pectin lyase fold;Pectin lyase fold/virulence factor;Pectinesterase, catalytic;		Q8LQA0.1(115.4);Q7X6L1.2(112.5);Q0DX02.1(111.4);Q7XUZ9.1(111.3);Q53P90.1(103.8);A0A0P0V0P1.1(68.7);	Invertase/pectin methylesterase inhibitor domain superfamily;Pectin lyase fold;Pectin lyase fold/virulence factor;Pectinesterase inhibitor domain;Pectinesterase, Asp active site;Pectinesterase, Tyr active site;Pectinesterase, catalytic;
A0A0P0Y136.1	Homologous	73	87.8048	62.7575	28.6646	A0A0P0Y1F3.1(66.9);	Os11g0237300 protein			Q5Z916.1(14.3);A0A0P0XS14.1(13.2);Q2R941.1(12.4);Q5VQM7.1(12.3);Q5SMV5.1(12.1);	Alpha/Beta hydrolase fold;G protein alpha subunit, helical insertion;GDSL lipase/esterase;GDSL lipase/esterase-like, plant;Guanine nucleotide binding protein (G-protein), alpha subunit;Haem peroxidase;Haem peroxidase superfamily;Leucine-rich repeat;Leucine-rich repeat domain superfamily;Leucine-rich repeat, typical subtype;Leucine-rich repeat-containing N-terminal, plant-type;P-loop containing nu…
Q0JFD2.1	Homologous	144	59.4224	69.2875	28.6532	Q6AT05.1(85.4);Q9FWV1.1(37.9);	G-patch domain-containing protein	G-patch domain;		Q8L460.1(31.1);Q2QM64.1(29.7);Q7EXZ3.1(19.7);Q6K687.1(16.2);	Domain of unknown function DUF4187;E3 ligase, CCCH-type zinc finger;G patch domain-containing protein 11;G-patch domain;GC-rich sequence DNA-binding factor-like domain;Nucleotide-binding alpha-beta plait domain superfamily;RNA recognition motif domain;RNA recognition motif domain, eukaryote;RNA-binding domain superfamily;Septin and tuftelin interacting protein;Splicing factor 45;Tuftelin interact…
Q0J6F7.1	Single-copy	76	53.9629	71.2013	28.6002		Os08g0323800 protein			Q657W3.2(26.0);Q75LB9.1(12.6);	Amino acid permease/ SLC12A domain;Pirin;Pirin, C-terminal domain;Pirin, N-terminal domain;RmlC-like cupin domain superfamily;RmlC-like jelly roll fold;SLC12A transporter, C-terminal;
Q0DD76.1	Single-copy	133	151.801	55.388	28.5816		Hexosyltransferase			Q10MP3.1(119.2);Q8LIF5.1(117.8);Q10L41.1(117.8);Q5JM51.1(15.6);Q8LJ43.1(14.2);Q75IZ5.1(14.0);Q7XQR7.2(13.3);	Calcineurin-like phosphoesterase domain, ApaH type;Glycosyl transferase, family 8;Iron/zinc purple acid phosphatase-like C-terminal domain;Metallo-dependent phosphatase-like;Nucleotide-diphospho-sugar transferases;Plant galacturonosyltransferase GAUT;Purple acid phosphatase, N-terminal;Purple acid phosphatase, metallophosphatase domain;Purple acid phosphatase-like;Purple acid phosphatase-like, N-…
A0A0P0WXN1.1	Single-copy	121	44.4541	75.8686	28.5682		Os06g0525101 protein			Q6H6S3.1(16.1);Q5ZEN9.1(14.5);Q6K3N8.1(14.2);Q6ATC3.1(13.6);	AAA+ ATPase domain;ATPase, AAA-type, core;CRA domain;CTLH, C-terminal LisH motif;CTLH/CRA C-terminal to LisH motif domain;Glycosyl transferase, family 8;Helix-turn-helix motif;Homeobox domain;Homeobox, conserved site;Homeobox-like domain superfamily;LIS1 homology motif;Leucine zipper, homeobox-associated;MIT;MIT domain superfamily;Nucleotide-diphospho-sugar transferases;P-loop containing nucleosi…
A0A0P0X7P4.1	Homologous	90	29.1114	108.866	28.5262	B9G3B5.1(58.9);	Os07g0560100 protein			A0A0P0XPV0.1(17.0);A0A0N7KCB8.1(14.4);Q850M0.1(13.4);	ARID DNA-binding domain;ARID DNA-binding domain superfamily;EF-Hand 1, calcium-binding site;EF-hand domain;EF-hand domain pair;Glycosyl transferase, family 43;High mobility group box domain;High mobility group box domain superfamily;Nucleotide-diphospho-sugar transferases;Potassium channel domain;Two pore domain potassium channel;Two pore domain potassium channel, plant;
A0A0P0W9X4.1	Single-copy	82	110.632	59.4207	28.5105		Os04g0404200 protein	Protein of unknown function DUF241, plant;		Q5Z976.1(51.7);Q5Z978.1(38.7);Q94GX4.1(31.0);Q94GX3.1(29.2);Q5Z975.1(27.8);	Protein of unknown function DUF241, plant;
A0A0P0Y0L0.1	Single-copy	75	42.8074	76.8347	28.4461		Os11g0224466 protein			Q69TX5.1(15.8);Q7X7L0.2(14.1);	CDT1 Geminin-binding domain-like;Concanavalin A-like lectin/glucanase domain superfamily;DNA replication factor Cdt1, C-terminal;Legume lectin domain;Protein kinase domain;Protein kinase, ATP binding site;Protein kinase-like domain superfamily;Serine/threonine-protein kinase, active site;Winged helix DNA-binding domain superfamily;
A0A0N7KG78.1	Single-copy	134	48.7965	73.3366	28.4312		Os02g0784200 protein			Q0JGS5.1(56.4);	Mei2/Mei2-like, C-terminal RNA recognition motif;Nucleotide-binding alpha-beta plait domain superfamily;RNA recognition motif domain;RNA-binding domain superfamily;Terminal EAR1-like, RNA recognition motif 3;
A0A0N7KKY1.1	Homologous	91	100.266	60.7187	28.4058	A0A0P0VRB0.1(49.2);	Os05g0469900 protein			A0A0P0UYZ2.1(81.2);	Reverse transcriptase domain;Reverse transcriptase zinc-binding domain;
A0A0P0X515.1	Single-copy	73	51.1352	72.1849	28.3497		Os07g0421150 protein			Q69VD1.1(15.3);Q75IP7.1(12.5);Q0JJU2.1(10.1);	Endonuclease/exonuclease/phosphatase;Endonuclease/exonuclease/phosphatase superfamily;Inositol polyphosphate-related phosphatase;Pentatricopeptide repeat;Protein of unknown function DUF2358;Regulatory factor, effector binding domain superfamily;SOUL haem-binding protein;Smr domain;Tetratricopeptide-like helical domain superfamily;
A0A0P0Y394.1	Single-copy	134	57.0532	69.8619	28.3297		Os11g0561800 protein			Q6ZIG7.1(19.7);Q6ZIH6.1(14.6);Q6ZII0.1(14.4);Q6ZIH2.1(14.3);	Cytochrome P450;Cytochrome P450 superfamily;Cytochrome P450, E-class, group I;Cytochrome P450, conserved site;
A0A0P0XGA8.1	Homologous	126	55.109	70.4563	28.1831	A0A0N7KJT6.1(185.6);B9F675.1(139.3);	Os08g0451651 protein			Q7XTN2.2(20.7);Q69QY7.1(20.1);Q5ZEM2.1(17.8);	Transmembrane protein DDB_G0292058-like;
Q6ZKI2.1	Homologous	141	163.645	54.2872	28.1526	Q84ZB9.1(184.7);Q7F2X8.1(72.7);A0A0P0WAK6.1(70.9);B7F8B0.1(54.8);Q0DT74.1(49.3);Q5TKK2.1(42.8);A0A0N7KD12.1(39.9);Q5TKK0.1(35.6);	RRM domain-containing protein	Nucleotide-binding alpha-beta plait domain superfamily;RNA-binding domain superfamily;RNA recognition motif domain;		Q6Z1C0.1(119.4);Q75LJ7.1(115.4);Q6YW54.1(111.6);Q6K271.1(107.9);	NUCL, RNA recognition motif 1;NUCL, RNA recognition motif 2;Nucleotide-binding alpha-beta plait domain superfamily;Paraneoplastic encephalomyelitis antigen;RNA recognition motif domain;RNA recognition motif domain, eukaryote;RNA-binding domain superfamily;WW domain;WW domain superfamily;Zinc finger, CCHC-type;Zinc finger, CCHC-type superfamily;
A0A0P0XXF1.1	Single-copy	94	486.73	42.084	28.1233		Helicase C-terminal domain-containing protein			A0A0P0WGX7.1(62.3);Q7F2E4.1(58.0);A0A0N7KJZ6.1(52.6);Q5WMW4.1(47.4);A4PBL4.1(37.0);Q60EX7.1(35.9);Q6H792.1(33.6);A0A0P0VBB9.1(33.4);	Chromo domain;Chromo-like domain superfamily;Chromo/chromo shadow domain;DNA/RNA helicase, ATP-dependent, DEAH-box type, conserved site;Helicase superfamily 1/2, ATP-binding domain;Helicase, C-terminal;P-loop containing nucleoside triphosphate hydrolase;SNF2-like, N-terminal domain superfamily;SNF2-related, N-terminal domain;Snf2, ATP coupling domain;Zinc finger, PHD-finger;Zinc finger, PHD-type;…
Q2QX17.1	Homologous	83	65.7357	67.0604	28.0713	Q0JLV5.1(116.5);C7JAB6.1(57.6);	Protein transport protein Sec61 subunit beta	Protein transport Sec61-beta/Sbh;Protein transport protein SecG/Sec61-beta/Sbh;		Q69MD4.1(17.8);A0A0P0VRQ0.1(16.3);Q337H3.1(12.0);Q7X5X8.2(11.2);Q8S7W9.1(11.1);	1-acyl-sn-glycerol-3-phosphate acyltransferase;Aspartic peptidase A1 family;Aspartic peptidase domain superfamily;Aspartic peptidase, active site;Helix-turn-helix motif;Homeobox domain;Homeobox, conserved site;Homeobox-like domain superfamily;K Homology domain;K Homology domain, type 1;K Homology domain, type 1 superfamily;Leucine zipper, homeobox-associated;Pepsin-like domain;Peptidase family A1…
A3BY13.1	Single-copy	101	71.2575	65.6802	28.0508		F-box domain-containing protein	F-box-like domain superfamily;F-box domain;		Q6Z846.1(22.9);Q0JN53.2(22.6);Q53MM4.1(19.2);A3BE96.1(18.2);	Domain unknown function DUF295;F-box domain;F-box-like domain superfamily;Leucine-rich repeat;Leucine-rich repeat domain superfamily;Leucine-rich repeat, cysteine-containing subtype;Quinoprotein alcohol dehydrogenase-like superfamily;WD40 repeat;WD40-repeat-containing domain;WD40-repeat-containing domain superfamily;WD40/YVTN repeat-like-containing domain superfamily;
A0A0P0Y9T9.1	Single-copy	107	31.3528	91.215	27.9972		Os12g0455902 protein			Q5Z5X8.1(14.0);Q7XPX3.1(13.3);	Choline transporter-like;Putative S-adenosyl-L-methionine-dependent methyltransferase;S-adenosyl-L-methionine-dependent methyltransferase;
Q0J9L1.1	Single-copy	86	140.016	56.1116	27.9462		C2 domain-containing protein			Q6ETC4.1(30.8);Q6Z653.1(24.1);Q69JE2.1(19.4);Q7XAL6.1(17.5);B9FQJ7.1(16.0);Q60EW9.1(15.1);	ARFGAP/RecO-like zinc finger;Arf GTPase activating protein;ArfGAP domain superfamily;C2 domain;C2 domain superfamily;Phosphoribosyltransferase C-terminal;Synaptotagmin, SMP domain;Synaptotagmin-like mitochondrial-lipid-binding domain;
A0A0P0WUZ9.1	Single-copy	124	189.369	52.4532	27.924		Os06g0243300 protein	SAM dependent carboxyl methyltransferase;Methyltransferase, alpha-helical capping domain;S-adenosyl-L-methionine-dependent methyltransferase;		Q6ZI02.1(95.8);Q67VH4.1(87.2);A0A0P0WW20.1(69.0);A0A0N7KSQ6.1(64.0);B9FNY9.1(62.7);Q53L40.1(56.4);B9FWJ7.1(50.8);	Methyltransferase, alpha-helical capping domain;S-adenosyl-L-methionine-dependent methyltransferase;SAM dependent carboxyl methyltransferase;
A0A0P0XMZ3.1	Single-copy	123	29.1565	100.993	27.8988		Os09g0407650 protein			A0A0P0WPZ5.1(14.1);Q6ZG77.1(12.6);	Alanine racemase/group IV decarboxylase, C-terminal;Diaminopimelate decarboxylase, LysA;Orn/DAP/Arg decarboxylase 2, C-terminal;Orn/DAP/Arg decarboxylase 2, N-terminal;Orn/DAP/Arg decarboxylase 2, conserved site;Orn/DAP/Arg decarboxylase 2, pyridoxal-phosphate binding site;Ornithine/DAP/Arg decarboxylase;PLP-binding barrel;Protein kinase domain;Protein kinase, ATP binding site;Protein kinase-like…
A0A0P0WYZ4.1	Single-copy	76	343.811	45.7039	27.8291		Os06g0632100 protein	Proton-dependent oligopeptide transporter family;		B9FIM6.1(57.0);Q6AU92.1(48.7);Q5Z6P7.1(40.3);Q7XDJ1.1(24.3);Q10S13.1(23.0);Q0ILL8.1(21.9);Q9FTZ3.1(21.6);Q2QLL1.1(19.5);Q7FA05.1(17.1);	MFS transporter superfamily;PTR2 family proton/oligopeptide symporter, conserved site;Proton-dependent oligopeptide transporter family;
A0A0P0VZ72.1	Single-copy	105	46.3837	74.0514	27.8266		Os03g0448000 protein			Q0DYB5.1(18.0);Q0J3D0.1(14.3);Q0D472.1(12.4);	DNA2/NAM7 helicase, AAA domain;DNA2/NAM7 helicase-like, AAA domain;Helicase superfamily 1/2, ATP-binding domain;P-loop containing nucleoside triphosphate hydrolase;TFIIS/LEDGF domain superfamily;Transcription elongation factor, TFIIS/CRSP70, N-terminal, sub-type;Transcription factor IIS, N-terminal;
Q9AX11.1	Homologous	141	353.186	45.3908	27.7758	A0A0P0WMW0.1(49.3);Q6Z159.1(34.7);	Inhibitor I9 domain-containing protein	Peptidase S8 propeptide/proteinase inhibitor I9;Peptidase S8 propeptide/proteinase inhibitor I9 superfamily;		Q0E256.1(54.5);Q7XT44.2(52.9);A0A0P0VHD8.1(52.7);A0A0P0W6P0.1(52.3);Q8RVA0.1(52.2);Q6EPJ5.1(51.1);Q6H733.1(50.5);Q5ZBR8.1(49.7);	Cucumisin-like catalytic domain;PA domain;Peptidase S8 propeptide/proteinase inhibitor I9;Peptidase S8 propeptide/proteinase inhibitor I9 superfamily;Peptidase S8, subtilisin, His-active site;Peptidase S8, subtilisin, Ser-active site;Peptidase S8, subtilisin-related;Peptidase S8/S53 domain;Peptidase S8/S53 domain superfamily;Subtilisin-like protease, fibronectin type-III domain;
A0A0N7KMG2.1	Single-copy	91	28.8652	102.275	27.7642		Os06g0631425 protein			Q7G606.1(21.2);Q8LR54.1(13.0);	Acyl-CoA N-acyltransferase;CCR4-NOT transcription complex subunit 7/8/Pop2;Myristoyl-CoA:protein N-myristoyltransferase;Myristoyl-CoA:protein N-myristoyltransferase, C-terminal;Myristoyl-CoA:protein N-myristoyltransferase, N-terminal;Myristoyl-CoA:protein N-myristoyltransferase, conserved site;Ribonuclease H superfamily;Ribonuclease H-like superfamily;
A0A0P0W040.1	Single-copy	98	139.678	56.049	27.7392		Os03g0564800 protein			Q0JHB5.1(46.6);A5HBA7.1(46.5);Q53NS7.1(46.4);A0A0P0X7F2.1(40.1);	Harbinger transposase-derived protein;
A0A0P0WPF7.1	Single-copy	117	29.1535	99.0538	27.6408		Os05g0501001 protein			Q6AUV3.1(14.6);A0A0P0X610.1(10.4);	NEMP family;Tetratricopeptide repeat;Tetratricopeptide repeat-containing domain;Tetratricopeptide-like helical domain superfamily;Twin-arginine translocation pathway, signal sequence;
A0A0P0Y227.1	Single-copy	106	51.0662	71.633	27.6133		Os11g0471000 protein			Q9ARS6.1(99.9);	Seven-in-absentia protein, TRAF-like domain;TRAF-like;Zinc finger, RING/FYVE/PHD-type;Zinc finger, SIAH-type;
A0A0P0WNB2.1	Single-copy	74	44.3658	74.9568	27.5708		Os05g0465250 protein			A0A0P0W1S1.1(13.6);Q6Z696.1(11.6);Q6AT25.1(11.0);	BTB/POZ domain-containing protein;Protein of unknown function DUF3615;Zinc finger, CCCH-type;Zinc finger, CCCH-type superfamily;Zinc-finger CCCH domain;
A0A0P0WMI0.1	Single-copy	109	112.89	58.6881	27.5384		Os05g0414100 protein			Q2QX87.2(52.5);Q0D472.1(46.4);A0A0P0V1N0.1(41.7);A0A0P0XTB6.1(27.8);Q94GG7.1(25.6);	TFIIS/LEDGF domain superfamily;Transcription elongation factor, TFIIS/CRSP70, N-terminal, sub-type;Transcription factor IIS, N-terminal;
Q67J15.1	Single-copy	86	82.2028	63.1198	27.4946		Cyclin-dependent kinase inhibitor 6	Cyclin-dependent kinase inhibitor;		Q2R185.2(54.5);Q6Z6G5.1(50.5);Q283L3.1(40.1);Q7XDH8.2(39.2);Q283L0.1(30.7);	Cyclin-dependent kinase inhibitor;
B9FWG4.1	Single-copy	148	89.6173	61.8218	27.4431		Os07g0253150 protein	F-box associated interaction domain;		A0A0P0XNK5.1(62.0);A0A0N7KQ54.1(59.6);Q7XC13.1(58.7);A0A0P0XP42.1(58.0);Q2QXA0.2(49.9);	F-box associated domain, type 1;F-box associated domain, type 3;F-box associated interaction domain;F-box domain;F-box-like domain superfamily;Galactose oxidase/kelch, beta-propeller;
Q5N9F0.1	Homologous	109	218.474	50.5789	27.4002	A3BD90.1(141.1);A2ZQ01.1(136.7);Q7FAP3.1(112.7);A0A0P0VFI9.1(69.0);	Os01g0866775 protein			Q67WW1.1(96.3);Q0DZS4.1(39.1);Q6ZIH6.1(33.0);Q6H763.1(31.6);A0A0P0VFT7.1(29.1);Q6ZIH2.1(28.8);Q6ZII0.1(27.8);A3A871.1(27.1);	Cytochrome P450;Cytochrome P450 superfamily;Cytochrome P450, E-class, group I;Cytochrome P450, conserved site;
A0A0P0VDA0.1	Single-copy	132	292.673	47.2871	27.3734		Peptidase A1 domain-containing protein	Aspartic peptidase A1 family;Peptidase family A1 domain;Aspartic peptidase domain superfamily;Xylanase inhibitor, N-terminal;		Q6ZC30.1(59.6);Q67UZ9.1(58.3);Q0JCV1.1(56.9);Q67V02.1(55.1);Q69IP6.1(54.7);A0A0P0X779.1(50.6);Q8S1N5.1(48.8);Q8W0E9.1(48.1);Q10M95.1(47.3);A0A0N7KH60.1(47.2);	Aspartic peptidase A1 family;Aspartic peptidase domain superfamily;Aspartic peptidase, active site;CND41-like;Pepsin-like domain, plant;Peptidase family A1 domain;Xylanase inhibitor, C-terminal;Xylanase inhibitor, N-terminal;
A0A0P0X5G4.1	Single-copy	93	33.1989	85.4677	27.3707		Os07g0416825 protein			Q2QWK9.2(13.2);Q2R089.1(11.3);	Aldolase-type TIM barrel;Hydroxymethylpyrimidine kinase/phosphomethylpyrimidine kinase;Leucine-rich repeat domain superfamily;Pyridoxamine kinase/Phosphomethylpyrimidine kinase;Ribokinase-like;Rx, N-terminal;Thiamin phosphate synthase superfamily;Thiamine phosphate synthase;Thiamine phosphate synthase/TenI;Virus X resistance protein-like, coiled-coil domain;
Q0DBV0.1	Single-copy	114	59.9695	68.243	27.3573		Os06g0524500 protein			Q69T22.2(16.0);Q2QXZ2.1(15.9);Q69TI8.1(14.6);Q2RAQ5.1(13.0);	Ankyrin repeat;Ankyrin repeat-containing domain;Ankyrin repeat-containing domain superfamily;BTB/POZ domain;C2 domain;C2 domain superfamily;Glycosyl transferase, family 31;Phosphoribosyltransferase C-terminal;Regulatory protein NPR, central domain;SKP1/BTB/POZ domain superfamily;
A0A0P0V7J1.1	Single-copy	116	28.6601	100.113	27.3154		Os01g0721700 protein			Q7XRQ7.2(19.7);Q6H543.1(14.1);	AUX/IAA domain;AUX/IAA protein;PB1 domain;Root UVB sensitive family;
Q5QL77.1	Single-copy	126	27.4978	118.824	27.291		Os01g0525000 protein			A0A0P0UZ10.1(16.1);A0A0P0Y5C3.1(15.9);Q0IU48.2(13.8);	Cysteine oxygenase/2-aminoethanethiol dioxygenase;PAS domain;PAS domain superfamily;PAS fold;Putative S-adenosyl-L-methionine-dependent methyltransferase;RmlC-like cupin domain superfamily;RmlC-like jelly roll fold;S-adenosyl-L-methionine-dependent methyltransferase;
A0A0P0W857.1	Single-copy	125	32.2067	87.1056	27.2761		Os04g0264900 protein			Q0J2T1.1(14.2);Q53PH9.1(13.3);	ATP-dependent RNA helicase Ski2, C-terminal;ATP-dependent RNA helicase Ski2-like;DEAD/DEAH box helicase domain;Helicase superfamily 1/2, ATP-binding domain;Helicase, C-terminal;P-loop containing nucleoside triphosphate hydrolase;Protein of unknown function DUF247, plant;rRNA-processing arch domain;
A0A0P0VBB0.1	Single-copy	36	69.4003	65.6472	27.2651		Os01g0881966 protein			Q6K4T4.1(14.8);Q2QMG1.1(14.5);Q10LW3.1(12.9);	Leucine-rich repeat domain superfamily;Leucine-rich repeat-containing N-terminal, plant-type;Protein kinase domain;Protein kinase, ATP binding site;Protein kinase-like domain superfamily;Serine-threonine/tyrosine-protein kinase, catalytic domain;Serine/threonine-protein kinase, active site;
Q69NJ8.1	Single-copy	111	72.1322	65.0162	27.2603		AMPKBI domain-containing protein	Association with the SNF1 complex (ASC) domain;ASC domain superfamily;SNF1-related protein kinase regulatory subunit beta-3;		Q6F337.1(90.0);Q18PR9.1(85.2);Q8LIG2.1(58.2);	AMP-activated protein kinase, glycogen-binding domain;ASC domain superfamily;Association with the SNF1 complex (ASC) domain;Immunoglobulin E-set;Immunoglobulin-like fold;SNF1-related protein kinase regulatory subunit beta-1;
A0A0P0WHJ4.1	Single-copy	108	44.5422	74.488	27.1864		Os05g0120250 protein			A0A0N7KQT7.1(20.8);A0A0P0YAP8.1(16.9);Q653T6.1(16.2);Q5VPQ6.1(15.4);	Aspartic peptidase A1 family;Aspartic peptidase domain superfamily;Aspartic peptidase, active site;CND41-like;Homeobox-like domain superfamily;Isoprenoid synthase domain superfamily;Myb domain;Myb-like transcription factor;Peptidase family A1 domain;Polyprenyl synthetase;Polyprenyl synthetase, conserved site;Protein of unknown function DUF309;SANT/Myb domain;TTHA0068-like superfamily;Xylanase inh…
A0A0P0VEV3.1	Single-copy	42	27.3188	120.819	27.1502		Os02g0151800 protein			Q6ENK5.1(14.7);	Mediator complex, subunit Med14;
B9FAT1.1	Single-copy	130	75.5588	64.2069	27.1326		Os03g0702133 protein			Q8LJC6.1(78.0);Q2R4X7.1(53.4);	UDP-glucuronosyl/UDP-glucosyltransferase;
A0A0P0WWJ6.1	Single-copy	80	28.7904	97.6713	27.0881		Os06g0350400 protein			Q7XS61.2(14.7);Q6K638.1(13.9);	Chloramphenicol acetyltransferase-like domain superfamily;Transferase;Yif1 family;
A0A0N7KDP0.1	Homologous	150	334.982	45.6487	26.9769	A0A0P0X5N5.1(37.9);	Os01g0728350 protein			Q0DS59.2(112.2);Q8LHV0.1(107.5);Q8LIR5.1(107.2);A0A0P0WZ62.1(105.5);A0A0P0X4A3.1(105.0);Q6ZIH2.1(104.8);B9G934.2(102.8);Q8GVL3.1(102.2);	Cytochrome P450;Cytochrome P450 superfamily;Cytochrome P450, E-class, group I;Cytochrome P450, conserved site;
A0A0P0W0F6.1	Single-copy	141	140.762	55.5936	26.9484		Os03g0578500 protein			A0A0P0X7H4.1(97.4);Q0JB91.1(15.0);P46465.2(12.0);Q5SNC0.1(11.9);	26S proteasome regulatory subunit P45-like;AAA ATPase, AAA+ lid domain;AAA+ ATPase domain;ATPase, AAA-type, conserved site;ATPase, AAA-type, core;IQ motif, EF-hand binding site;Kinesin motor domain superfamily;Myosin S1 fragment, N-terminal;Myosin head, motor domain;Myosin, N-terminal, SH3-like;Nucleophile aminohydrolases, N-terminal;P-loop containing nucleoside triphosphate hydrolase;Peptidase T…
B9FMA3.1	Single-copy	75	39.4437	77.664	26.9299		Os11g0688666 protein			Q7XTY9.1(55.7);	Heavy metal-associated domain superfamily;Heavy metal-associated domain, HMA;Superoxide dismutase (Cu/Zn) / superoxide dismutase copper chaperone;Superoxide dismutase, copper/zinc binding domain;Superoxide dismutase-like, copper/zinc binding domain superfamily;
Q0JP13.1	Single-copy	86	33.8565	83.4965	26.8845		Os01g0251400 protein			C7J9F5.1(16.3);Q2RAT3.2(15.3);	F-box domain;F-box-like domain superfamily;Kelch repeat type 1;Kelch-type beta propeller;
A0A0P0V6H3.1	Single-copy	141	1185.47	32.3632	26.8773		Os01g0677450 protein	Leucine-rich repeat domain superfamily;		Q69KC4.1(118.0);Q10LT7.1(116.6);A0A0P0WR41.1(116.6);A0A0P0VGF0.1(116.1);G9LZD7.1(116.0);Q53P83.1(115.7);A0A0P0Y3G5.1(115.3);Q6H8C5.1(114.1);A0A0P0VDQ9.1(112.9);Q2R2D7.2(112.5);	Leucine rich repeat 4;Leucine-rich repeat;Leucine-rich repeat domain superfamily;Leucine-rich repeat, typical subtype;Leucine-rich repeat-containing N-terminal, plant-type;Protein kinase domain;Protein kinase, ATP binding site;Protein kinase-like domain superfamily;Serine-threonine/tyrosine-protein kinase, catalytic domain;Serine/threonine-protein kinase, active site;
A0A0P0WN43.1	Single-copy	122	69.2625	65.3967	26.7982		Os05g0444750 protein			Q60EM0.1(63.5);	DYW domain;Pentatricopeptide repeat;Tetratricopeptide-like helical domain superfamily;
A0A0P0X0H0.1	Homologous	134	56.7616	68.8463	26.7455	A0A0P0X049.1(109.6);B7F9K7.1(67.3);Q0J103.1(65.0);A0A0P0XPJ7.1(55.3);	Os06g0688300 protein	RlpA-like domain superfamily;		Q10KN4.1(41.8);Q7XT39.2(41.1);Q6H677.1(40.9);Q4PR50.2(40.8);Q9M4X7.1(40.8);Q7XT40.2(40.2);Q4PR48.2(40.1);Q7G6Z5.1(39.5);Q5W6Z9.1(38.8);Q40637.2(38.7);	Expansin;Expansin, cellulose-binding-like domain;Expansin, cellulose-binding-like domain superfamily;Expansin/Lol pI;Expansin/pollen allergen, DPBB domain;Major pollen allergen Lol pI;RlpA-like domain superfamily;RlpA-like protein, double-psi beta-barrel domain;
A0A0P0X643.1	Single-copy	122	50.8345	70.9828	26.6652		Os07g0466350 protein			Q0JEG7.1(73.4);	BTB/POZ domain-containing protein;
A0A0P0XRD7.1	Homologous	149	213.788	50.4886	26.6015	A0A0P0XQV6.1(83.8);	Os10g0106500 protein	Chloramphenicol acetyltransferase-like domain superfamily;Transferase;		A0A0P0XR12.1(73.3);Q75GN9.1(67.7);A0A0P0Y199.1(62.0);Q5Z9G3.1(56.6);Q10A61.1(51.6);A3C298.1(51.2);A0A0P0WIJ8.1(44.9);Q7X880.1(42.5);Q8S222.1(39.6);Q5WMS2.1(37.8);	Chloramphenicol acetyltransferase-like domain superfamily;Transferase;
A0A0P0Y094.1	Single-copy	95	30.361	89.4705	26.5697		Os11g0215700 protein			Q5JMM0.1(15.4);A0A0P0VXS8.1(14.2);	F-box associated interaction domain;F-box domain;F-box-like domain superfamily;Protein E6-like;
A0A0P0X8D8.1	Homologous	95	26.6765	123.998	26.5565	B9G7P7.1(35.5);	Os07g0591800 protein			Q6ESK6.1(12.0);Q84NY6.1(11.6);	PDZ domain;PDZ superfamily;Peptidase M50;Rubisco LSMT methyltransferase, plant;Rubisco LSMT, substrate-binding domain;Rubisco LSMT, substrate-binding domain superfamily;SET domain;
A0A0P0VQB3.1	Single-copy	125	27.8719	100.044	26.5556		Os02g0783350 protein			Q65X71.1(13.7);B7E741.1(13.0);	Calcium-transporting P-type ATPase, N-terminal autoinhibitory domain;Cation-transporting P-type ATPase, C-terminal;Cation-transporting P-type ATPase, N-terminal;HAD superfamily;HAD-like superfamily;P-type ATPase;P-type ATPase, A domain superfamily;P-type ATPase, cytoplasmic domain N;P-type ATPase, phosphorylation site;P-type ATPase, subfamily IIB;P-type ATPase, transmembrane domain superfamily;TM…
B7F7Z9.1	Single-copy	109	64.1583	66.5202	26.5533		Os04g0483000 protein			Q5N9K2.1(52.0);Q651M9.1(36.4);Q6ZFW2.1(28.2);Q0DF00.2(27.6);	BAG domain;BAG domain superfamily;Molecular chaperone regulator BAG;Ubiquitin domain;Ubiquitin-like domain superfamily;
A0A0P0WKV1.1	Homologous	126	525.867	40.6556	26.5443	C7J804.1(88.5);A0A0P0WGM7.1(74.1);Q5N735.1(51.8);A0A0P0WE69.1(45.1);A0A0P0XS34.1(33.3);A0A0P0WL68.1(32.9);	Os05g0336200 protein	Proton-dependent oligopeptide transporter family;		Q5N733.1(120.0);Q10PF8.1(116.5);Q6I5V4.1(115.7);Q5N734.1(113.5);Q0JHC1.2(112.9);Q6YVW2.1(112.2);A0A0P0VAX0.1(111.7);A0A0P0VAW9.1(110.0);A0A0P0XQZ1.1(109.7);Q7G761.1(108.7);	MFS transporter superfamily;PTR2 family proton/oligopeptide symporter, conserved site;Proton-dependent oligopeptide transporter family;
A0A0P0W644.1	Single-copy	121	42.3055	75.195	26.5269		Os04g0116100 protein			Q942W3.1(17.9);Q6ZF81.1(17.5);Q5NBM8.2(16.6);A0A0P0WT63.1(14.6);Q10EC6.2(14.0);	ELK domain;Homeobox KN domain;Homeobox domain;Homeobox, conserved site;Homeobox-like domain superfamily;KNOX1;Myb domain;Myb-like transcription factor;Protein of unknown function DUF761, plant;Protein of unknown function DUF868, plant;SANT/Myb domain;Uncharacterized protein At5g23160-like;
A0A0N7KS66.1	Single-copy	94	34.8204	81.5926	26.5052		Os10g0551401 protein			Q5N9R6.1(13.6);Q8S7T9.1(10.8);	Fatty acyl-CoA reductase;Fatty acyl-CoA reductase, C-terminal;Male sterility, NAD-binding;NAD(P)-binding domain superfamily;Transcription factor IIIC, 90kDa subunit, N-terminal;WD40 repeat;WD40-repeat-containing domain superfamily;WD40/YVTN repeat-like-containing domain superfamily;
A0A0P0VGE0.1	Homologous	84	1035.72	33.6024	26.5007	Q0D5R0.1(40.8);A0A0P0XHC2.1(36.1);	Protein kinase domain-containing protein			Q6YUZ6.1(119.6);A0A0P0X732.1(117.2);Q0D5R3.1(115.3);Q53KU9.1(115.0);Q7XHL0.1(114.1);A0A0P0XHX6.1(113.8);A0A0P0XHR4.1(112.6);Q0D5T4.1(112.4);	EGF-like calcium-binding domain;EGF-like calcium-binding, conserved site;EGF-like domain;EGF-type aspartate/asparagine hydroxylation site;Gnk2-homologous domain;Gnk2-homologous domain superfamily;Leucine-rich repeat;Leucine-rich repeat domain superfamily;Leucine-rich repeat, typical subtype;Leucine-rich repeat-containing N-terminal, plant-type;Protein kinase domain;Protein kinase, ATP binding sit…
A0A0P0XH37.1	Single-copy	124	26.8928	109.402	26.3798		Os08g0479801 protein			Q6Z0Q6.1(20.8);A0A0N7KQV8.1(13.5);	Cytochrome P450;Cytochrome P450 superfamily;Cytochrome P450, E-class, group I;Cytochrome P450, conserved site;
A0A0P0Y001.1	Single-copy	113	66.511	65.7796	26.3404		Os11g0177925 protein			Q7XC51.1(19.2);Q10M33.1(15.2);Q9FW92.1(13.7);Q10KZ7.1(11.6);Q8GSY5.1(11.3);Q2R0C3.1(11.2);	Cullin repeat-like-containing domain superfamily;Cytochrome P450;Cytochrome P450 superfamily;Cytochrome P450, E-class, group I;Cytochrome P450, conserved site;E3 ubiquitin-protein ligase RNF126-like, zinc-ribbon;Exocyst complex component Exo70;Homeobox-like domain superfamily;Isopenicillin N synthase-like;Myb domain;Myb domain, plants;Non-haem dioxygenase N-terminal domain;Oxoglutarate/iron-depen…
C7J964.1	Homologous	96	97.2334	60.0812	26.3057	A0A0P0Y731.1(41.7);A0A0P0Y6W6.1(41.3);A0A0P0XYP6.1(39.0);C7J9F4.1(36.6);A0A0P0Y689.1(33.5);Q0DAS8.1(33.4);Q0E3E6.1(33.2);A0A0P0WMQ2.1(30.9);	RING-type domain-containing protein	Zinc finger, RING-type;Zinc finger, RING/FYVE/PHD-type;		Q7XD81.1(94.2);Q9SDG0.1(93.1);	E3 ubiquitin-protein ligase RNF126-like, zinc-ribbon;Zinc finger, RING-type;Zinc finger, RING/FYVE/PHD-type;
H2KWI3.1	Homologous	133	27.3399	102.125	26.2819	A0A0P0XE94.1(81.6);	Os11g0603900 protein			Q7XIW5.1(22.9);Q8W0E9.1(14.6);	Aspartic peptidase A1 family;Aspartic peptidase domain superfamily;CND41-like;NAF domain;NAF/FISL domain;Peptidase family A1 domain;Protein kinase domain;Protein kinase, ATP binding site;Protein kinase-like domain superfamily;Serine/threonine-protein kinase, active site;Xylanase inhibitor, C-terminal;Xylanase inhibitor, N-terminal;
A0A0P0V3E5.1	Homologous	138	705.003	37.4855	26.2789	A0A0P0Y091.1(38.2);A0A0P0Y0R7.1(36.6);	Rx_N domain-containing protein	Rx, N-terminal;		Q2R8J2.1(116.0);Q53Q39.1(108.1);Q53P15.1(95.7);Q2QZG5.2(79.4);Q6Z5Z6.1(74.4);Q7XI19.1(74.0);A0A0P0X0V5.1(70.2);Q2QQB5.1(66.0);Q6YUT7.1(63.0);Q652D6.1(61.9);	Leucine-rich repeat;Leucine-rich repeat domain superfamily;NB-ARC;P-loop containing nucleoside triphosphate hydrolase;Rx, N-terminal;Virus X resistance protein-like, coiled-coil domain;
A0A0P0W7B1.1	Single-copy	86	58.7751	67.8558	26.249		Os04g0169999 protein			Q6Z696.1(21.9);Q0JB92.1(15.8);A0A0P0VGQ8.1(11.8);Q0DWE8.1(11.2);Q6H6S3.1(10.1);	Achaete-scute transcription factor-related;BTB/POZ domain-containing protein;Cytochrome P450;Cytochrome P450 superfamily;Cytochrome P450, E-class, group I;Cytochrome P450, conserved site;Helix-loop-helix DNA-binding domain superfamily;Helix-turn-helix motif;Homeobox domain;Homeobox, conserved site;Homeobox-like domain superfamily;Leucine zipper, homeobox-associated;
C7IZN4.1	Homologous	113	328.022	45.5743	26.2364	A0A0N7KLC0.1(78.1);	CRC domain-containing protein			Q2QMG6.1(114.7);Q5JMF9.1(96.3);Q6Z253.1(92.0);A0A0P0WWF9.1(80.9);Q6L4W5.1(71.7);Q2QMG8.1(68.4);	CRC domain;Lin-54 family;Tesmin/TSO1-like CXC domain;
A0A0P0VYE8.1	Homologous	110	26.7129	107.056	26.0719	A0A0P0VD70.1(49.9);	Os03g0401225 protein			A0A0P0V315.1(12.3);Q8RYZ1.1(10.0);	CRAL-TRIO lipid binding domain;CRAL-TRIO lipid binding domain superfamily;CRAL/TRIO, N-terminal domain;CRAL/TRIO, N-terminal domain superfamily;Cytochrome P450;Cytochrome P450 superfamily;Cytochrome P450, E-class, group I;Cytochrome P450, conserved site;GOLD domain;GOLD domain superfamily;
A0A0P0V9T9.1	Single-copy	137	35.971	79.5737	25.9925		Os01g0824666 protein			Q69UJ1.1(18.0);Q4JHE0.1(14.9);Q6Z8Z7.1(13.0);A0A0P0Y1S1.1(12.7);Q6H6S3.1(10.1);	Ankyrin repeat;Ankyrin repeat-containing domain;Ankyrin repeat-containing domain superfamily;Ataxin-2, C-terminal;CID8-like protein, RNA recognition motif 1;CID8-like protein, RNA recognition motif 2;Cytochrome P450;Cytochrome P450 superfamily;Cytochrome P450, E-class, group IV;Helix-turn-helix motif;Homeobox domain;Homeobox, conserved site;Homeobox-like domain superfamily;Leucine zipper, homeobo…
A0A0P0XV80.1	Homologous	98	182.238	52.0418	25.9435	A0A0P0VEU1.1(87.7);	KARI N-terminal Rossmann domain-containing protein	Ketol-acid reductoisomerase;Ketol-acid reductoisomerase, N-terminal;NAD(P)-binding domain superfamily;		Q5VPB9.1(106.8);Q65XK0.1(106.6);	6-phosphogluconate dehydrogenase, domain 2;6-phosphogluconate dehydrogenase-like, C-terminal domain superfamily;Ketol-acid reductoisomerase;Ketol-acid reductoisomerase, C-terminal;Ketol-acid reductoisomerase, N-terminal;Ketol-acid reductoisomerase, plant;NAD(P)-binding domain superfamily;
A0A0P0W7I1.1	Single-copy	63	627.233	38.5683	25.943		Os04g0226666 protein			B9F819.1(62.8);A0A0P0W7S1.1(50.7);A0A0P0VDQ9.1(42.7);A0A0N7KEX1.1(41.6);A0A0P0VGF0.1(38.9);Q6H8C5.1(35.3);A0A0N7KMC1.1(34.1);B9FTY2.1(32.8);A3BD37.1(30.1);A0A0P0WYQ5.1(30.0);	Leucine-rich repeat;Leucine-rich repeat domain superfamily;Leucine-rich repeat, typical subtype;Leucine-rich repeat-containing N-terminal, plant-type;Protein kinase domain;Protein kinase, ATP binding site;Protein kinase-like domain superfamily;Serine-threonine/tyrosine-protein kinase, catalytic domain;Serine/threonine-protein kinase, active site;
A0A0P0Y241.1	Single-copy	147	32.2231	84.0381	25.8683		Os11g0434800 protein			Q5N8G6.1(11.9);Q7XXN2.1(11.7);Q69NF5.1(11.4);	AAA+ ATPase domain;ACT domain;ATPase, AAA-type, core;Clp ATPase, C-terminal;Clp protease, ATP-binding subunit ClpX;Glycoside hydrolase family 9;Glycoside hydrolase family 9, His active site;Glycosyl hydrolases family 9, Asp/Glu active sites;P-loop containing nucleoside triphosphate hydrolase;Protein kinase domain;Protein kinase-like domain superfamily;Serine-threonine/tyrosine-protein kinase, cat…
A0A0P0XBR4.1	Homologous	129	600.845	38.9845	25.8624	A0A0P0XWS4.1(105.1);Q0DAN9.1(55.4);A0A0P0XJ71.1(31.8);	Os08g0152400 protein			B9G3V1.1(119.7);Q69P73.1(118.0);Q7EY63.1(117.1);Q6ZIH1.1(116.8);Q6ZII0.1(116.8);Q6ZIH6.1(116.8);A0A0P0XW68.1(116.5);Q6Z0Q6.1(116.5);B7F8Q5.1(116.4);Q6ZIH2.1(116.1);	Cytochrome P450;Cytochrome P450 superfamily;Cytochrome P450, E-class, group I;Cytochrome P450, conserved site;
B9FVZ4.1	Homologous	148	128.062	56.2555	25.8559	A0A0P0XDY5.1(35.9);	Os07g0193500 protein	Chloramphenicol acetyltransferase-like domain superfamily;		Q5SMM6.1(43.9);Q5SMQ0.1(39.7);Q6ZBI7.1(29.4);Q5SMM8.1(28.3);Q6K638.1(24.3);Q53MM5.1(22.9);Q0JBZ8.1(22.9);Q7XHC3.1(22.6);A0A0P0VCC3.1(21.7);	Chloramphenicol acetyltransferase-like domain superfamily;Transferase;
A0A0P0XGT4.1	Single-copy	112	25.7951	141.115	25.7741		Os08g0460650 protein			Q6Z2N0.1(13.6);Q0DSV9.2(10.2);	DNA topoisomerase VI, subunit A;Microtubule-associated protein, MAP65/Ase1/PRC1;Spo11/DNA topoisomerase VI subunit A;Spo11/DNA topoisomerase VI subunit A superfamily;Spo11/DNA topoisomerase VI, subunit A, N-terminal;Topoisomerase 6 subunit A/Spo11, TOPRIM domain;Winged helix-like DNA-binding domain superfamily;
A0A0P0V5L6.1	Single-copy	67	403.111	43.1373	25.7138		Os01g0633900 protein			Q0DG31.1(62.2);A0A0P0V6L3.1(61.4);Q7XBZ9.1(56.3);Q650Z3.1(55.2);Q8W315.1(52.4);Q10NS9.1(26.5);Q5JJJ5.1(24.9);Q5JNJ6.1(12.6);	Dynamin GTPase effector;Dynamin central domain;Dynamin superfamily;Dynamin, GTPase domain;Dynamin, GTPase region, conserved site;Dynamin-type guanine nucleotide-binding (G) domain;GTPase effector domain;P-loop containing nucleoside triphosphate hydrolase;PH-like domain superfamily;
A0A0P0WJV7.1	Single-copy	147	59.509	67.2456	25.6824		Os05g0267900 protein			Q6YTR7.1(74.7);	DNA-binding domain superfamily;Methyl-CpG DNA binding;Methyl-CpG-binding domain-containing protein 8;Zinc finger C2H2-type;
A0A0P0V654.1	Single-copy	44	42.2994	74.3364	25.6648		Os01g0660100 protein			P49027.1(16.7);Q6L4F8.1(14.4);	G-protein beta WD-40 repeat;WD40 repeat;WD40 repeat, conserved site;WD40-repeat-containing domain;WD40-repeat-containing domain superfamily;WD40/YVTN repeat-like-containing domain superfamily;
A0A0P0XJK1.1	Single-copy	123	25.9076	115.528	25.6374		Os08g0549950 protein			Q69UJ1.1(18.5);Q84VA6.1(18.2);Q5ZB59.1(17.0);Q7X6L2.1(16.6);	ARGOS/ARL/OSR1;Ataxin-2, C-terminal;CID8-like protein, RNA recognition motif 1;CID8-like protein, RNA recognition motif 2;F-box domain;F-box-like domain superfamily;FBD domain;Leucine-rich repeat domain superfamily;Nucleotide-binding alpha-beta plait domain superfamily;RAB6-interacting golgin;RNA recognition motif domain;RNA-binding domain superfamily;
Q654C9.1	Single-copy	149	27.2254	97.7591	25.6289		Os06g0505900 protein			Q8H4E4.1(15.9);Q0DC30.1(14.1);Q6Z6I5.1(12.7);	CRAL-TRIO lipid binding domain;CRAL-TRIO lipid binding domain superfamily;CRAL/TRIO, N-terminal domain;CRAL/TRIO, N-terminal domain superfamily;F-box domain;F-box-like domain superfamily;FBD domain;Ribonuclease T2, His active site 1;Ribonuclease T2, His active site 2;Ribonuclease T2, eukaryotic;Ribonuclease T2-like;Ribonuclease T2-like superfamily;
A0A0N7KF78.1	Homologous	37	84.3557	61.6946	25.6046	Q0JF88.1(50.0);	Os02g0435200 protein			Q0J7A0.1(50.8);	Domain of unknown function DUF4218;Transposase-associated domain;Transposon, En/Spm-like;
Q0DR36.1	Single-copy	121	33.7727	81.4017	25.5899		Os03g0422300 protein			Q75HW4.1(20.0);Q7XIF0.1(11.6);	Ascorbate oxidase homologue, first cupredoxin domain;Cupredoxin;Multicopper oxidase, type 1;Multicopper oxidase, type 2;Multicopper oxidase, type 3;Peptide-N4-(N-acetyl-beta-glucosaminyl)asparagine amidase A;
A0A0N7KJE5.1	Single-copy	98	34.1117	80.9398	25.5541		Os04g0529300 protein			Q6AVM9.1(16.4);A0A0P0VB13.1(13.3);C7J6H5.1(13.1);A0A0P0VFF5.1(12.8);Q6I5C3.1(11.5);	Alpha/Beta hydrolase fold;Homeobox-like domain superfamily;Lecithin:cholesterol/phospholipid:diacylglycerol acyltransferase;MFS transporter superfamily;Myb domain;Myb domain, plants;Oxoglutarate/iron-dependent dioxygenase;Polyketide cyclase/dehydrase;Prolyl 4-hydroxylase, alpha subunit;Proton-dependent oligopeptide transporter family;SANT/Myb domain;START-like domain superfamily;ShKT domain;
A0A0P0WMG9.1	Single-copy	112	49.1495	70.7714	25.5221		Os05g0416500 protein			Q6I584.1(25.8);Q9AXB6.1(15.7);	Domain of unknown function DUF1221;Protein kinase domain;Protein kinase-like domain superfamily;Serine-threonine/tyrosine-protein kinase, catalytic domain;
Q0JK17.1	Homologous	131	53.9283	68.9221	25.5124	A0A0N7KG61.1(221.7);	Os01g0703000 protein			Q53JI9.1(45.2);	Glycosyl transferase, family 1;Glycosyltransferase subfamily 4-like, N-terminal domain;HAD superfamily;Sucrose phosphate synthase, plant;Sucrose-phosphatase-like, N-terminal;Sucrose-phosphate synthase, C-terminal;
A0A0P0X6Q9.1	Single-copy	140	37.5746	77.4671	25.4929		Os07g0498100 protein			A0A0P0X6S6.1(13.6);Q9FW33.2(11.9);A0A0P0UYM7.1(11.6);	Cytochrome P450;Cytochrome P450 superfamily;Cytochrome P450, E-class, group I;Cytochrome P450, conserved site;Gamma-glutamyltranspeptidase;Gnk2-homologous domain;Gnk2-homologous domain superfamily;Nucleophile aminohydrolases, N-terminal;Protein kinase domain;Protein kinase, ATP binding site;Protein kinase-like domain superfamily;Serine/threonine-protein kinase, active site;
A0A0P0Y1S9.1	Single-copy	131	48.0596	71.1855	25.4525		Os11g0428700 protein			Q6Z8A4.1(96.6);Q0JAL2.1(91.4);Q336P6.2(90.5);Q69TZ2.1(89.2);A0A0P0VFV9.1(71.5);A0A0P0VFM4.1(64.5);Q6H6M4.1(41.0);	Protein of unknown function DUF597;
A0A0P0Y2X2.1	Single-copy	103	29.6376	88.0291	25.444		Os11g0507701 protein			Q5N941.1(20.9);	CASTOR/POLLUX/SYM8 ion channels;NAD(P)-binding domain superfamily;
C7IWH4.1	Single-copy	59	29.8676	87.3746	25.3983		Os01g0107300 protein			A0A0P0VXK3.1(12.2);Q8H393.1(10.9);	Nucleotide-binding alpha-beta plait domain superfamily;RNA recognition motif domain;RNA recognition motif domain, eukaryote;RNA-binding domain superfamily;TMEM115/Pdh1/Rbl19;
A0A0P0VEZ0.1	Single-copy	117	48.6473	70.8581	25.3667		Os02g0152950 protein			A0A0P0XB61.1(14.4);Q6YX21.1(13.9);Q8S5N6.1(12.3);Q84MF1.1(12.3);	Concanavalin A-like lectin/glucanase domain superfamily;F-box associated domain, type 3;F-box associated interaction domain;F-box domain;F-box-like domain superfamily;Fatty acid desaturase, type 2;Ferritin-like superfamily;Legume lectin domain;Legume lectin, beta chain, Mn/Ca-binding site;Myelin P0 protein-related;Protein kinase domain;Protein kinase, ATP binding site;Protein kinase-like domain s…
A0A0P0UZJ7.1	Single-copy	114	108.676	58.0799	25.3107		Os01g0202601 protein			Q5W6J3.1(62.9);Q0JMY6.1(20.1);Q6Z0R3.1(19.8);P48489.2(18.9);Q5VRS7.1(18.1);Q6K9Q5.1(17.3);Q69V59.1(13.9);A3C4N5.2(13.3);	Calcineurin-like phosphoesterase domain, ApaH type;Metallo-dependent phosphatase-like;PP5, C-terminal metallophosphatase domain;PPP domain;Serine-threonine protein phosphatase, N-terminal;Serine/threonine protein phosphatase 5;Serine/threonine-specific protein phosphatase/bis(5-nucleosyl)-tetraphosphatase;Snf7 family;Tetratricopeptide repeat;Tetratricopeptide repeat 1;Tetratricopeptide repeat-con…
A0A0P0W7I5.1	Single-copy	130	377.894	43.6562	25.303		S_locus_glycop domain-containing protein	S-locus glycoprotein domain;		A0A0P0XQ04.1(69.2);A0A0P0XQ32.1(65.4);A0A0P0W7R2.1(64.4);A0A0P0XQY3.1(62.2);A0A0P0XRC1.1(61.9);A0A0N7KR84.1(53.3);A0A0P0XPZ9.1(49.1);Q2QUP5.2(45.1);	Bulb-type lectin domain;Bulb-type lectin domain superfamily;EGF-like domain;PAN/Apple domain;Protein kinase domain;Protein kinase, ATP binding site;Protein kinase-like domain superfamily;S-locus glycoprotein domain;S-locus-specific glycoprotein/EP1;S-receptor-like serine/threonine-protein kinase;Serine-threonine/tyrosine-protein kinase, catalytic domain;Serine/threonine-protein kinase, active sit…
A0A0P0VLC1.1	Single-copy	82	26.8923	97.6061	25.2925		Os02g0594750 protein			Q8S7N6.1(15.8);Q10T66.1(11.6);	Pterin 4 alpha carbinolamine dehydratase;Pterin 4 alpha carbinolamine dehydratase superfamily;Pyruvate kinase;Pyruvate kinase, C-terminal;Pyruvate kinase, C-terminal domain superfamily;Pyruvate kinase, active site;Pyruvate kinase, barrel;Pyruvate kinase, insert domain superfamily;Pyruvate kinase-like domain superfamily;Pyruvate kinase-like, insert domain superfamily;Pyruvate/Phosphoenolpyruvate k…
B9G8R9.1	Homologous	81	49.3275	70.5099	25.2924	A0A0P0Y534.1(89.0);	Os11g0667100 protein	Adaptor protein Cbl, N-terminal domain superfamily;		Q10RJ5.1(56.4);	Adaptor protein Cbl, N-terminal domain superfamily;PLAC8 motif-containing protein;
A0A0N7KU85.1	Homologous	78	77.104	62.8205	25.2782	A0A0P0WMN3.1(102.0);	Os12g0568275 protein			Q9AXB6.1(62.6);	Domain of unknown function DUF1221;Protein kinase domain;Protein kinase-like domain superfamily;Serine-threonine/tyrosine-protein kinase, catalytic domain;
Q0DKJ1.1	Single-copy	72	114.905	57.2778	25.1501		Pyr_redox_dim domain-containing protein			Q94CN9.1(43.3);P48642.2(27.9);Q8S5T1.1(22.5);	Dihydrolipoamide dehydrogenase;FAD/NAD(P)-binding domain;FAD/NAD(P)-binding domain superfamily;FAD/NAD-linked reductase, dimerisation domain superfamily;Glutathione-disulphide reductase;Pyridine nucleotide-disulphide oxidoreductase, class I;Pyridine nucleotide-disulphide oxidoreductase, class I, active site;Pyridine nucleotide-disulphide oxidoreductase, dimerisation domain;
Q650S5.1	Single-copy	110	62.9889	65.9091	25.1408		Os06g0674400 protein			Q6Z9I5.1(31.9);Q6EQ09.1(27.2);Q0DHC5.1(16.3);	Protein of unknown function DUF868, plant;WEB family;
Q0DIE6.1	Single-copy	102	60.007	66.7157	25.1203		Os05g0395400 protein			Q0E2A9.1(15.4);Q5N8G6.1(14.3);Q69JJ3.1(14.2);Q9LWJ5.1(13.8);B9GBN8.1(13.1);	AAA+ ATPase domain;ATPase, AAA-type, core;CLU domain;Clp ATPase, C-terminal;Clp protease, ATP-binding subunit ClpX;Clustered mitochondria protein, N-terminal;Cys/Met metabolism, pyridoxal phosphate-dependent enzyme;Cystathionine beta-lyase, eukaryotic;Mpv17/PMP22;P-loop containing nucleoside triphosphate hydrolase;Pyridoxal phosphate-dependent transferase;Pyridoxal phosphate-dependent transferase…
A0A0P0VYQ2.1	Single-copy	96	32.2295	82.5865	25.1001		Os03g0367501 protein			Q10KW8.1(37.7);	F-box associated domain, type 3;F-box associated interaction domain;F-box domain;F-box-like domain superfamily;
A0A0P0VN46.1	Single-copy	134	70.0642	64.159	25.0822		Os02g0688100 protein	Protein of unknown function DUF2921;		A0A0P0X7Z2.1(34.9);Q0D558.1(24.8);	Protein of unknown function DUF2921;
A0A0P0V9F9.1	Single-copy	102	26.0905	101.583	25.0269		Os01g0807800 protein			Q2QWN0.1(23.2);	Las1;
A0A0P0Y534.1	Homologous	77	48.3287	70.6766	24.9815	B9G8R9.1(89.0);Q2QV00.1(39.7);	Os11g0665800 protein	Adaptor protein Cbl, N-terminal domain superfamily;		Q10RJ5.1(52.2);	Adaptor protein Cbl, N-terminal domain superfamily;PLAC8 motif-containing protein;
A0A0P0Y383.1	Single-copy	117	416.443	42.4803	24.9765		Chal_sti_synt_N domain-containing protein	Chalcone/stilbene synthase, N-terminal;Polyketide synthase, type III;Thiolase-like;		Q6Z4M0.1(118.3);A0A0P0XSB0.1(117.7);A0A0N7KKC2.1(110.6);Q8H4L3.1(109.0);Q2R3A1.1(103.7);Q7XMR1.2(100.3);Q2R2G0.2(85.6);Q69UB7.1(69.6);Q7X795.1(58.5);Q8H305.1(55.5);	Chalcone/stilbene synthase, C-terminal;Chalcone/stilbene synthase, N-terminal;Chalcone/stilbene synthase, active site;Polyketide synthase, type III;Thiolase-like;
Q652I9.1	Single-copy	73	67.6745	64.6356	24.973		Os06g0671600 protein			Q6Z0A5.1(22.1);Q10B19.1(20.4);Q69UJ1.1(20.3);Q6AVV8.1(19.0);	Ataxin-2, C-terminal;CID8-like protein, RNA recognition motif 1;CID8-like protein, RNA recognition motif 2;Homeobox-like domain superfamily;Methyltransferase TRM13;Myb domain;Myb-like transcription factor;Nucleotide-binding alpha-beta plait domain superfamily;RNA recognition motif domain;RNA-binding domain superfamily;Ribosome-inactivating protein;Ribosome-inactivating protein superfamily;Ribosom…
Q0ILX3.1	Single-copy	93	40.1014	74.9871	24.9494		Os12g0615200 protein			Q6ES98.1(16.8);Q94CT7.1(13.4);	Ankyrin repeat;Ankyrin repeat-containing domain;Ankyrin repeat-containing domain superfamily;Mammalian uncoordinated homology 13, domain 2;Munc13 homology 1;Protein unc-13 homologue;Zinc finger, RING-type;Zinc finger, RING/FYVE/PHD-type;
Q8GVR6.1	Single-copy	70	92.8254	59.9814	24.9307		Os07g0480550 protein			Q6Z632.1(22.4);Q7XZF6.1(18.0);Q60E58.1(17.3);Q7XEK8.1(16.6);	E3 ubiquitin-protein ligase RNF126-like, zinc-ribbon;E3 ubiquitin-protein ligase SIRP1;NB-ARC;P-loop containing nucleoside triphosphate hydrolase;Protein RETICULATA-related;Protein of unknown function PDDEXK-like;Rx, N-terminal;Virus X resistance protein-like, coiled-coil domain;Zinc finger, RING-type;Zinc finger, RING/FYVE/PHD-type;
B9F7Z8.1	Single-copy	102	29.8543	86.2088	24.9259		Os03g0857100 protein			Q9FWT5.1(14.3);Q6ESE7.1(13.4);Q7XQE6.2(13.2);	CLU central domain;CLU domain;Clustered mitochondria protein, N-terminal;Kiwellin-like;Protein BIC;RlpA-like domain superfamily;Tetratricopeptide repeat;Tetratricopeptide repeat-containing domain;Tetratricopeptide-like helical domain superfamily;
A0A0P0Y321.1	Single-copy	118	25.6066	105.668	24.9032		Os11g0540000 protein			Q2QM41.1(14.2);Q6F2N5.1(11.4);	Circularly permuted (CP)-type guanine nucleotide-binding (G) domain;GTP binding domain;P-loop containing nucleoside triphosphate hydrolase;Post-SET domain;Zinc finger C2H2 superfamily;Zinc finger C2H2-type;
A0A0P0VHX9.1	Single-copy	140	121.683	56.4015	24.8556		Phospho-2-dehydro-3-deoxyheptonate aldolase	DAHP synthetase, class II;		Q6YTT3.1(51.3);Q75W16.1(49.0);Q75LR2.2(44.2);Q336R7.1(40.9);	Aldolase-type TIM barrel;DAHP synthetase, class II;
A3A415.1	Single-copy	87	44.8273	72.1759	24.8425		Os02g0192001 protein			Q6Z2M9.1(19.7);Q7XCK8.1(11.9);Q6ESU4.1(10.4);	Ataxin-2, C-terminal;CID8-like protein, RNA recognition motif 1;EF-Hand 1, calcium-binding site;EF-hand domain;EF-hand domain pair;Nucleotide-binding alpha-beta plait domain superfamily;Protein kinase domain;Protein kinase, ATP binding site;Protein kinase-like domain superfamily;Protein of unknown function DUF241, plant;RNA recognition motif domain;RNA-binding domain superfamily;Serine/threonine-…
Q5JM47.1	Homologous	130	36.6552	77.3685	24.7901	Q75K57.1(54.9);Q5JM44.1(41.9);Q75K56.1(40.1);Q0DGQ0.1(39.6);	Os01g0727500 protein	Senescence regulator S40;		Q53QG6.1(75.4);Q7XVJ5.2(71.1);Q5N7G7.1(68.6);Q8GZX5.1(64.3);Q7XUJ4.1(61.7);A0A0P0Y713.1(58.7);Q7XUA4.1(52.8);A0A0P0XVF5.1(51.2);	Senescence regulator S40;
Q69V50.1	Single-copy	89	25.1747	111.098	24.7682		Os06g0609200 protein			Q9AWS7.1(15.4);Q6ZAH2.1(10.8);	4-hydroxybenzoate polyprenyltransferase-like;AP2/ERF domain;AP2/ERF domain superfamily;B3 DNA binding domain;DNA-binding domain superfamily;DNA-binding pseudobarrel domain superfamily;Prenyltransferase;UbiA prenyltransferase conserved site;UbiA prenyltransferase family;
A0A0P0XNH6.1	Single-copy	126	24.8642	125.102	24.764		Os09g0473650 protein			Q6EP41.1(17.3);Q84UR1.1(15.8);Q6I5C3.1(14.8);Q6L4H4.1(10.5);	AP2/ERF domain;AP2/ERF domain superfamily;B3 DNA binding domain;DNA-binding domain superfamily;DNA-binding pseudobarrel domain superfamily;Dynein light chain superfamily;Dynein light chain, type 1/2;Mg2+ transporter protein, CorA-like/Zinc transport protein ZntB;Polyketide cyclase/dehydrase;START-like domain superfamily;
Q2QUR0.1	Single-copy	103	30.1458	85.2477	24.7569		Os12g0256100 protein			Q5ZDL5.1(24.9);	Uncharacterised domain XH;XS domain;XS domain superfamily;Zinc finger-XS domain;
A0A0P0Y945.1	Homologous	123	339.792	44.5618	24.7514	Q0D840.1(89.0);Q851R5.1(64.3);Q6Z4I3.1(63.2);Q9AS75.1(61.7);Q0DKF1.1(60.9);Q75GM1.1(59.9);Q7XSQ7.2(40.2);Q0J9V5.1(35.4);	Thioredoxin domain-containing protein	Thioredoxin-like superfamily;Thioredoxin domain;		Q2QTV8.1(118.9);Q942L2.1(88.7);Q75M08.2(88.1);Q0IWL9.2(82.0);Q67UF5.1(78.6);Q53LQ0.1(74.7);	Disulphide isomerase;Endoplasmic reticulum resident protein 29, C-terminal;Endoplasmic reticulum resident protein 29, C-terminal domain superfamily;Glutaredoxin;Glutaredoxin, PICOT-like;Leucine-rich repeat domain superfamily;Monothiol glutaredoxin-related;NB-ARC;P-loop containing nucleoside triphosphate hydrolase;Protein disulphide isomerase;Rx, N-terminal;Thioredoxin domain;Thioredoxin, conserve…
Q656E8.1	Homologous	82	42.7672	73.1646	24.7392	Q10MM9.1(79.5);Q8H3Z5.1(55.3);Q850Z7.1(49.7);Q5Z8Z1.1(40.7);Q0JLU6.1(33.9);Q653H1.1(32.2);	Os01g0306200 protein	Protein of unknown function DUF3511;		Q5W6Y2.1(105.3);Q6YVF0.1(62.0);Q6Z9U8.1(11.3);	Protein of unknown function DUF3511;Uncharacterised conserved protein UCP012943;
C7IYF9.1	Homologous	68	42.752	73.1691	24.7351	Q69UP7.1(71.8);Q84UR0.1(62.0);	zf-LSD1 domain-containing protein	LSD1-like;Zinc finger, LSD1-type;		A0A0P0WEM3.1(13.7);A0A0P0WEM6.1(12.1);	Probable transposase, Ptta/En/Spm, plant;
Q84YW0.1	Homologous	91	40.0278	74.7946	24.722	Q84YV4.1(72.2);Q6ZLQ6.1(62.1);	Os07g0146300 protein			Q6H8E4.1(13.0);B7F8F5.1(11.9);A0A0P0V1G0.1(10.6);	ADP/ATP carrier protein;Armadillo-like helical;Armadillo-type fold;Ccc1 family;MFS transporter superfamily;Nucleic acid binding NABP;Pumilio RNA-binding repeat;Pumilio homology domain;Pumilio, RNA binding domain;
A0A0P0XH04.1	Single-copy	147	31.149	83.4714	24.7218		Os08g0484902 protein			Q68UR2.1(15.4);Q0DGS1.2(13.8);	Auxin response factor;B3 DNA binding domain;DNA-binding pseudobarrel domain superfamily;SLC26A/SulP transporter;SLC26A/SulP transporter domain;STAS domain;STAS domain superfamily;Sulphate anion transporter, conserved site;
A0A0P0XLW1.1	Single-copy	83	28.6581	88.3096	24.6997		Os09g0401550 protein			Q94JJ0.1(14.4);Q10Q29.1(13.7);	Aldolase-type TIM barrel;Fructose-bisphosphate aldolase class-I active site;Fructose-bisphosphate aldolase, class-I;Leucine rich repeat 4;Leucine-rich repeat;Leucine-rich repeat domain superfamily;Leucine-rich repeat, typical subtype;Leucine-rich repeat-containing N-terminal, plant-type;
A3BKL9.1	Homologous	144	309.457	45.5508	24.6979	Q7F901.1(53.0);	Os07g0532700 protein	Armadillo-like helical;Armadillo-type fold;		Q0IMG9.2(64.7);Q5VRH9.1(59.8);Q10NB2.1(55.7);Q6ZC56.1(50.6);Q6Z2K3.1(46.9);A0A0P0X147.1(42.4);Q6EUK7.1(36.9);Q8LRC7.1(34.8);	Armadillo;Armadillo-like helical;Armadillo-type fold;U box domain;Zinc finger, RING/FYVE/PHD-type;
A0A0P0Y843.1	Single-copy	108	31.2779	83.0333	24.5968		Os12g0219100 protein			Q69QQ7.1(14.7);Q8H069.1(12.2);Q9FWT5.1(11.4);	BTB/POZ domain;Kiwellin-like;NPH3 domain;RlpA-like domain superfamily;SKP1/BTB/POZ domain superfamily;Thioredoxin-like superfamily;UAS;UBX domain;Ubiquitin-like domain superfamily;
Q2QUD0.1	Single-copy	143	31.1232	83.1811	24.552		Expressed protein			Q6K647.1(17.9);Q6ZI32.1(12.4);	Cullin repeat-like-containing domain superfamily;DYW domain;Exocyst complex component Exo70;Pentatricopeptide repeat;Tetratricopeptide-like helical domain superfamily;
A0A0P0VZM4.1	Homologous	98	50.0631	69.601	24.5323	A0A0P0XLJ8.1(186.2);	Os03g0584148 protein			Q6ETS7.1(73.6);	Protein BYPASS-related;
A0A0P0V0K8.1	Single-copy	126	43.9621	72.3175	24.5167		Os01g0260950 protein			Q5NAS8.1(93.1);	Zinc finger, C3HC4 RING-type;Zinc finger, RING-type;Zinc finger, RING/FYVE/PHD-type;
A3A4C6.1	Single-copy	126	51.2931	69.0222	24.3937		rRNA N-glycosidase	Ribosome-inactivating protein superfamily;Ribosome-inactivating protein;Ribosome-inactivating protein, subdomain 1;		Q6Z425.1(39.0);Q10F32.1(36.5);Q10EZ4.1(33.1);B9G746.1(32.4);Q6AVW0.1(23.7);A0A0P0W2A5.1(23.1);A0A0P0X332.1(21.4);Q6AVV8.1(18.4);Q69S32.1(18.3);	Ribosome-inactivating protein;Ribosome-inactivating protein superfamily;Ribosome-inactivating protein, subdomain 1;
A0A0P0VR42.1	Single-copy	109	61.8705	65.6954	24.378		F-box domain-containing protein	F-box-like domain superfamily;F-box domain;		C7IZ90.1(67.4);Q6K3F6.1(48.1);Q2QY75.2(36.5);	F-box-like domain superfamily;Phloem protein 2-like;
A0A0P0WWI3.1	Homologous	131	34.3431	78.8992	24.345	Q69Y32.1(180.1);	Os06g0362100 protein			A0A0P0XCD9.1(14.8);Q0J7Y8.2(14.0);	ATP-dependent RNA helicase DEAD-box, conserved site;DEAD/DEAH box helicase domain;Helicase superfamily 1/2, ATP-binding domain;Helicase, C-terminal;P-loop containing nucleoside triphosphate hydrolase;RNA helicase, DEAD-box type, Q motif;
A0A0P0WZU6.1	Homologous	122	185.636	51.0508	24.2598	Q7X635.2(253.6);	Os06g0670900 protein			Q33B99.1(59.5);Q6H5V9.1(57.5);Q0DV08.1(29.8);Q5N951.1(21.6);Q2QXH1.1(12.5);	DYW domain;Pentatricopeptide repeat;Protein of unknown function DUF639;Tetratricopeptide-like helical domain superfamily;
Q7X635.2	Homologous	122	185.636	51.0508	24.2598	A0A0P0WZU6.1(253.6);	OSJNBa0060D06.2 protein			Q33B99.1(59.5);Q6H5V9.1(57.5);Q0DV08.1(29.8);Q5N951.1(21.6);Q2QXH1.1(12.5);	DYW domain;Pentatricopeptide repeat;Protein of unknown function DUF639;Tetratricopeptide-like helical domain superfamily;
Q2QRN5.1	Homologous	91	36.6639	76.7011	24.2542	Q0DPD2.1(65.8);Q7G790.1(61.7);A0A0P0W1T6.1(57.1);B9GD09.1(50.7);Q7G787.1(49.5);A0A0P0Y9R3.1(43.8);Q6EPR9.1(39.6);	Kazal-like domain-containing protein	Kazal domain;		Q5U1Q4.1(14.2);Q8H096.1(13.5);Q75G54.1(12.3);	Haem peroxidase;Haem peroxidase superfamily;Per1-like;Peroxidases heam-ligand binding site;Plant peroxidase;Secretory peroxidase;
Q0JNI1.1	Homologous	96	29.1874	85.8583	24.2264	A0A0P0V1A7.1(79.6);B9FQ17.1(30.9);	Os01g0288800 protein			Q10MM6.1(13.3);Q0DZ02.1(12.2);Q7XC52.1(12.1);	Protein of unknown function DUF761, plant;
A0A0P0W320.1	Single-copy	122	25.7186	97.6992	24.202		Os03g0725033 protein			Q5ZEN9.1(14.4);Q6YUS7.1(12.3);	AAA+ ATPase domain;ATPase, AAA-type, core;MIT;MIT domain superfamily;P-loop containing nucleoside triphosphate hydrolase;Pentatricopeptide repeat;Smr domain;Smr domain superfamily;Tetratricopeptide-like helical domain superfamily;Vps4 oligomerisation, C-terminal;
Q67U58.1	Single-copy	78	109.825	57.3641	24.2007		Os09g0444500 protein			Q6YUB8.1(46.7);Q6Z248.1(16.6);Q9LIT4.1(16.4);Q0DGM1.1(16.4);Q7XPT0.2(16.2);Q0DYB4.1(15.5);	Brevis radix (BRX) domain;Dolichyldiphosphatase, PAP2 domain;Dual specificity phosphatase, catalytic domain;Dual specificity protein phosphatase domain;Helix-turn-helix motif;Homeobox domain;Homeobox, conserved site;Homeobox-like domain superfamily;Leucine zipper, homeobox-associated;Phosphatidic acid phosphatase type 2/haloperoxidase;Phosphatidic acid phosphatase type 2/haloperoxidase superfamil…
Q53PI7.1	Homologous	119	32.87	80.2395	24.1838	Q2QX11.1(72.8);	Expressed protein			Q0IPY1.1(12.8);B7F9F7.1(12.2);	Leucine-rich repeat;Leucine-rich repeat domain superfamily;Leucine-rich repeat, typical subtype;Myc-type, basic helix-loop-helix (bHLH) domain;Protein kinase domain;Protein kinase-like domain superfamily;Serine-threonine/tyrosine-protein kinase, catalytic domain;Transcription factor MYC/MYB N-terminal;
Q8H8I9.1	Single-copy	136	41.1056	73.5632	24.1763		Os10g0368300 protein			A0A0P0V678.1(20.4);Q5VRL4.1(20.1);Q94DH3.1(18.1);A0A0N7KHR4.1(16.3);	Cysteine oxygenase/2-aminoethanethiol dioxygenase;Homeobox-like domain superfamily;Myb domain;Myb domain, plants;RmlC-like cupin domain superfamily;SANT/Myb domain;SNARE;Syntaxin, N-terminal domain;Syntaxin/epimorphin, conserved site;Target SNARE coiled-coil homology domain;Vacuolar protein sorting-associated protein 16;Vps16, C-terminal;Vps16, C-terminal domain superfamily;Vps16, N-terminal;
Q652K8.1	Single-copy	115	29.4901	85.0843	24.1473		Oxidoreductase-like domain-containing protein	Oxidoreductase-like, N-terminal;Oxidoreductase-like domain-containing protein 1;		Q6K715.1(12.3);Q60EZ9.1(12.2);	Protein CHUP1-like;Tetratricopeptide repeat;Tetratricopeptide repeat-containing domain;Tetratricopeptide-like helical domain superfamily;
Q8H3Z5.1	Homologous	88	35.7091	77.3614	24.1447	Q10MM9.1(72.7);Q850Z7.1(60.1);Q656E8.1(57.2);Q5Z8Z1.1(46.0);Q653H1.1(44.5);Q0JLU6.1(31.5);	Os07g0690200 protein	Protein of unknown function DUF3511;		Q5W6Y2.1(105.3);Q6YVF0.1(62.0);Q6Z9U8.1(11.3);	Protein of unknown function DUF3511;Uncharacterised conserved protein UCP012943;
A0A0P0XJV4.1	Single-copy	143	317.209	44.9678	23.9915		Os09g0315050 protein	Double-stranded RNA-binding domain;Ribonuclease III domain;Ribonuclease III, endonuclease domain superfamily;		Q8LMR2.1(69.4);Q69KJ0.1(57.1);Q5N870.1(56.0);Q6ATG6.2(55.2);Q7XD96.2(42.2);A7LFZ6.1(42.1);	DEAD/DEAH box helicase domain;Dicer dimerisation domain;Dicer dimerisation domain superfamily;Double-stranded RNA-binding domain;Helicase superfamily 1/2, ATP-binding domain;Helicase, C-terminal;Helicase/UvrB, N-terminal;P-loop containing nucleoside triphosphate hydrolase;PAZ domain;PAZ domain superfamily;Ribonuclease III domain;Ribonuclease III, endonuclease domain superfamily;
A0A0P0Y5G0.1	Homologous	44	46.5596	70.6045	23.9833	A0A0P0XXT8.1(39.3);A0A0P0Y5D9.1(39.0);A0A0P0Y5L9.1(39.0);B9F8L6.1(39.0);A0A0P0Y2M7.1(36.1);A0A0P0W867.1(33.4);	Os11g0680800 protein			Q6F3A6.1(14.9);A2ZVI7.1(14.3);	EF-Hand 1, calcium-binding site;EF-hand domain;EF-hand domain pair;Protein kinase domain;Protein kinase, ATP binding site;Protein kinase-like domain superfamily;Serine/threonine-protein kinase, active site;
A0A0P0XSZ5.1	Single-copy	115	396.156	42.5739	23.9696		Os10g0344000 protein	Multi antimicrobial extrusion protein;		Q7XFI4.1(94.6);B7FAP5.1(86.5);Q651L0.1(75.3);Q651I6.1(72.0);Q0D9N5.2(63.9);Q5QN97.1(51.5);Q651N3.1(43.0);Q5N7N1.1(40.3);Q6ZB84.1(39.3);	Multi antimicrobial extrusion protein;
A0A0P0VLE0.1	Homologous	133	179.212	51.3113	23.9557	A0A0P0X7C1.1(69.9);A0A0P0WZR8.1(54.6);	Os02g0603500 protein			A0A0P0XH65.1(76.8);A0A0P0X8A8.1(62.2);Q6YYW9.1(61.5);Q2R3L6.1(61.0);Q5Z5G1.1(61.0);Q7F0Z6.1(60.2);Q0JEE5.1(59.7);	Myb-like domain;No apical meristem-associated, C-terminal domain;
A0A0P0XRT4.1	Single-copy	143	31.5887	81.3797	23.9223		Os10g0156100 protein			Q10LF7.1(18.1);Q10QK1.1(16.2);	Armadillo-like helical;Armadillo-type fold;Circularly permuted (CP)-type guanine nucleotide-binding (G) domain;GTP binding domain;GTP-binding protein, orthogonal bundle domain superfamily;Nucleolar GTP-binding protein 2;Nucleolar GTP-binding protein 2, N-terminal domain;P-loop containing nucleoside triphosphate hydrolase;Pumilio RNA-binding repeat;Pumilio homology domain;
A0A0P0Y6G9.1	Homologous	83	54.2147	67.5699	23.8298	B9G927.1(138.2);	Os12g0117001 protein			Q6ETI4.1(49.0);	GDP-fucose protein O-fucosyltransferase;Putative O-fucosyltransferase, plant;
A0A0N7KM71.1	Homologous	114	386.078	42.7414	23.7301	A0A0P0XNB0.1(34.2);	Os06g0519700 protein	Alpha/Beta hydrolase fold;Peptidase S10, serine carboxypeptidase;		A0A0P0W2K4.1(107.5);Q10DG3.1(103.0);Q6ZH05.1(84.5);Q10QL9.1(79.3);A0A0P0Y2H0.1(76.4);P37890.1(76.0);Q0ISU2.1(74.7);Q2R3G8.1(74.6);	Alpha/Beta hydrolase fold;Peptidase S10, serine carboxypeptidase;Serine carboxypeptidase, serine active site;Serine carboxypeptidases, histidine active site;
Q0DW84.1	Single-copy	40	467.205	40.71	23.7053		Os02g0827100 protein			Q337H1.1(69.8);Q109P7.1(52.2);Q84T04.1(51.3);Q6AVM9.1(48.8);Q7XNS6.2(45.7);Q0D7Z6.1(45.2);Q94H92.1(42.0);A0A0P0VTI7.1(26.7);Q5VR08.1(19.9);	Oxoglutarate/iron-dependent dioxygenase;Prolyl 4-hydroxylase, alpha subunit;ShKT domain;
A0A0N7KU73.1	Homologous	58	221.334	48.7864	23.6911	A0A0P0XE54.1(39.4);	Os12g0558133 protein			Q5JM56.1(116.5);Q65XL7.1(45.2);	G-protein beta WD-40 repeat;Protein kinase domain;Protein kinase-like domain superfamily;WD40 repeat;WD40 repeat, conserved site;WD40-repeat-containing domain;WD40-repeat-containing domain superfamily;WD40/YVTN repeat-like-containing domain superfamily;
A0A0N7KIX2.1	Single-copy	97	70.653	63.1546	23.6864		Os04g0370200 protein			Q6Z0W7.1(29.1);Q6YT77.1(26.6);Q69JV5.1(13.0);Q67WE2.1(12.6);	Kynurenine formamidase superfamily;Kynurenine formamidase/cyclase-like;Leucine-rich repeat;Leucine-rich repeat domain superfamily;Leucine-rich repeat, typical subtype;Leucine-rich repeat-containing N-terminal, plant-type;MTERF superfamily, mitochondrial/chloroplastic;Protein kinase domain;Protein kinase-like domain superfamily;Protein of unknown function DUF3082;Serine/threonine-protein kinase, a…
A0A0P0XQZ8.1	Single-copy	86	473.616	40.5314	23.6264		Os10g0118100 protein			Q2R0Y6.1(64.7);Q2R0X3.1(62.0);Q5VPA8.1(44.5);B9F819.1(43.5);B9G830.1(39.6);Q8RU46.1(38.4);A0A0P0WY19.1(36.5);	Leucine-rich repeat;Leucine-rich repeat domain superfamily;Leucine-rich repeat, typical subtype;Leucine-rich repeat-containing N-terminal, plant-type;Protein kinase domain;Protein kinase, ATP binding site;Protein kinase-like domain superfamily;Serine-threonine/tyrosine-protein kinase, catalytic domain;Serine/threonine-protein kinase, active site;
A0A0P0X0N2.1	Single-copy	74	28.1101	86.573	23.609		Os06g0703550 protein			Q75LV3.1(14.7);Q9FWU1.2(10.7);	E3 ubiquitin ligase RBR family;E3 ubiquitin-protein ligase ARIH2;IBR domain;Kiwellin-like;RlpA-like domain superfamily;Zinc finger, RING-type;Zinc finger, RING/FYVE/PHD-type;
Q7XJW5.1	Single-copy	143	27.2622	88.6406	23.6028		OSJNBa0016O02.5 protein			Q9AWZ7.1(16.4);Q10LG8.1(13.2);Q8L4S2.1(11.6);	F-box domain;F-box-like domain superfamily;Ketopantoate hydroxymethyltransferase;Magnesium transporter MRS2-like;Pyruvate kinase-like domain superfamily;Pyruvate/Phosphoenolpyruvate kinase-like domain superfamily;Tubby, C-terminal;Tubby, C-terminal, conserved site;Tubby-like, C-terminal;
A0A0P0WTX6.1	Single-copy	105	458.875	40.8314	23.5525		Os06g0189300 protein	Voltage-dependent anion channel superfamily;		Q8L4G8.1(102.0);Q75G55.1(87.0);Q5NAK4.1(86.1);Q6ZLB6.1(68.2);B9EY47.1(62.5);Q7XTX7.1(54.2);A0A0P0XUR5.1(14.8);Q6ZC30.1(12.1);	Aspartic peptidase A1 family;Aspartic peptidase domain superfamily;CCR4-NOT transcription complex subunit 7/8/Pop2;Pepsin-like domain, plant;Peptidase family A1 domain;Ribonuclease H superfamily;Ribonuclease H-like superfamily;S-type anion channel;Voltage-dependent anion channel;Voltage-dependent anion channel superfamily;Xylanase inhibitor, C-terminal;Xylanase inhibitor, N-terminal;
A0A0P0VHS0.1	Single-copy	95	23.8357	113.507	23.5322		Os02g0288650 protein			Q75IR0.1(15.4);Q656J6.1(12.1);	ABC transporter-like;ABC-2 type transporter;ACT domain;Helix-loop-helix DNA-binding domain superfamily;Myc-type, basic helix-loop-helix (bHLH) domain;P-loop containing nucleoside triphosphate hydrolase;
A0A0P0YBC6.1	Single-copy	82	27.6056	87.3122	23.4528		Os12g0557501 protein			B7ECR1.1(15.1);Q5WA93.1(13.6);P46609.2(13.0);	Cilia- and flagella-associated protein 298;ELK domain;Homeobox KN domain;Homeobox domain;Homeobox, conserved site;Homeobox-like domain superfamily;KNOX1;KNOX2;Ubiquitin-associated protein 1;
A0A0P0VEP0.1	Single-copy	128	34.2686	77.7109	23.4314		Os02g0140950 protein			Q6Z0Y0.1(26.8);Q6Z2W9.1(12.1);Q7XP38.2(11.5);	EGF-like calcium-binding domain;EGF-like calcium-binding, conserved site;EGF-like domain;Galactose oxidase/kelch, beta-propeller;Kelch-type beta propeller;Protein kinase domain;Protein kinase, ATP binding site;Protein kinase-like domain superfamily;Protein of unknown function DUF1677, Oryza sativa;Serine/threonine-protein kinase, active site;Wall-associated receptor kinase, galacturonan-binding d…
A0A0P0XK53.1	Single-copy	126	49.9262	68.7405	23.3931		Os09g0257233 protein			Q6ZFH6.1(74.0);	Glycosyltransferase 61;
A0A0P0WJZ6.1	Single-copy	74	23.4969	120.612	23.349		Os05g0274600 protein			B7ECR1.1(14.4);Q9FWC1.1(11.9);	Cilia- and flagella-associated protein 298;Glycoside hydrolase, family 37;Glycoside hydrolase, family 37, conserved site;Six-hairpin glycosidase superfamily;Six-hairpin glycosidase-like superfamily;
Q6K6S3.1	Single-copy	83	51.639	68.0602	23.3231		Os02g0496201 protein			Q10M41.1(19.4);Q8W3M0.2(19.4);	Ethylene insensitive 3;Ethylene insensitive 3-like protein, DNA-binding domain superfamily;
A0A0P0WRD9.1	Homologous	67	43.5311	71.4313	23.3206	A0A0P0WAX1.1(33.6);	OVATE domain-containing protein	Ovate protein family;Ovate protein family, C-terminal;		Q5W6T7.1(71.1);	DNA-binding domain, ovate family-like;Ovate protein family, C-terminal;Ovate protein family;
A0A0P0XWD1.1	Single-copy	114	30.913	81.1842	23.299		Os10g0518601 protein			Q5Z8T5.1(14.7);A0A0P0XQK8.1(14.5);	Domain unknown function DUF295;F-box domain;F-box-like domain superfamily;Nucleotide-binding alpha-beta plait domain superfamily;RNA recognition motif domain;RNA-binding domain superfamily;
A0A0P0XJY6.1	Single-copy	123	23.391	120.331	23.2395		Os09g0130901 protein			A0A0P0XZ22.1(14.4);A0A0P0XV69.1(13.7);	Homeobox KN domain;Homeobox domain;Homeobox-like domain superfamily;POX domain;Protein of unknown function DUF247, plant;
A0A0P0W2X7.1	Single-copy	108	74.2419	62.1213	23.21		Os03g0731025 protein			Q69UJ1.1(18.7);Q8H341.1(14.9);Q6YTU7.1(14.5);Q5QNA0.1(14.1);A0A0P0VYH1.1(14.0);Q651J5.1(13.6);Q7XIW7.1(12.5);	Ataxin-2, C-terminal;CID8-like protein, RNA recognition motif 1;CID8-like protein, RNA recognition motif 2;EXS, C-terminal;G-protein beta WD-40 repeat;Nucleotide-binding alpha-beta plait domain superfamily;PHO1, SPX domain;Protein of unknown function DUF4228, plant;Purine permease, plant;RNA recognition motif domain;RNA-binding domain superfamily;SPX domain;WD40 repeat;WD40 repeat, conserved site…
A0A0P0XLC2.1	Homologous	83	742.292	35.6506	23.1752	A0A0P0VIS7.1(41.7);	Os09g0295850 protein			Q0JK40.1(87.5);Q75HY5.1(83.7);A0A0P0XUP5.1(81.6);A0A0P0VJT3.1(81.3);A0A0P0X6L2.1(78.6);A0A0P0VZA9.1(78.6);Q6AVI0.1(76.2);B9FJG3.1(72.5);	HAT, C-terminal dimerisation domain;Ribonuclease H-like superfamily;Zinc finger C2H2 superfamily;Zinc finger, BED-type;hAT-like transposase, RNase-H fold;
A0A0P0XFK7.1	Homologous	131	51.6198	67.9435	23.1653	Q0DFN9.1(175.1);A0A0P0YAK4.1(106.1);	Os08g0402700 protein			Q2R1K9.1(37.2);Q6EQX3.1(13.7);	MEI2-like, RNA recognition motif 1;MEI2-like, RNA recognition motif 3;Mei2/Mei2-like, C-terminal RNA recognition motif;Nucleotide-binding alpha-beta plait domain superfamily;Putative S-adenosyl-L-methionine-dependent methyltransferase;RNA recognition motif domain;RNA-binding domain superfamily;S-adenosyl-L-methionine-dependent methyltransferase;
A0A0P0X5X0.1	Single-copy	114	23.3991	115.609	23.1571		Os07g0472150 protein			Q6H533.1(15.0);Q60EZ9.1(12.9);	Protein CHUP1-like;Protein of unknown function DUF761, plant;
A0A0P0WU50.1	Single-copy	114	40.144	73.0974	23.1559		Os06g0192950 protein			Q0INW5.1(15.7);Q6YTJ6.1(12.6);Q6K4V3.1(10.2);	Aspartic peptidase A1 family;Aspartic peptidase domain superfamily;Aspartic peptidase, active site;CND41-like;Pentacotripeptide-repeat region of PRORP;Pentatricopeptide repeat;Peptidase family A1 domain;Pre-mRNA-splicing factor CWC24-like;Tetratricopeptide-like helical domain superfamily;Xylanase inhibitor, C-terminal;Xylanase inhibitor, N-terminal;Zinc finger, CCCH-type;Zinc finger, CCCH-type su…
Q84MX9.1	Single-copy	94	24.2166	100.646	23.1367		Os03g0602015 protein			A0A0P0XS14.1(14.3);A0A0P0VFX0.1(12.5);	Haem peroxidase;Haem peroxidase superfamily;Plant peroxidase;Protein of unknown function DUF1677, Oryza sativa;Secretory peroxidase;
Q0DMQ7.2	Single-copy	112	327.317	44.2214	23.1011		Os03g0798000 protein	Aldehyde oxidase/xanthine dehydrogenase, molybdopterin binding domain superfamily;		Q852M2.1(63.8);Q852M1.1(63.1);Q7XH05.1(62.6);Q6Z351.1(43.3);	2Fe-2S ferredoxin, iron-sulphur binding site;2Fe-2S ferredoxin-like superfamily;2Fe-2S ferredoxin-type iron-sulfur binding domain;Aldehyde oxidase/xanthine dehydrogenase;Aldehyde oxidase/xanthine dehydrogenase, a/b hammerhead;Aldehyde oxidase/xanthine dehydrogenase, a/b hammerhead superfamily;Aldehyde oxidase/xanthine dehydrogenase, molybdopterin binding;Aldehyde oxidase/xanthine dehydrogenase, m…
Q6YXW1.1	Single-copy	146	56.9002	66.1918	23.0975		Os02g0143600 protein	Protein of unknown function DUF1677, Oryza sativa;		Q6YXV4.1(34.7);Q6Z2Z1.1(33.8);Q6Z2Y4.1(32.1);Q6YXV7.1(30.4);B9FGL2.1(15.6);	Protein of unknown function DUF1677, Oryza sativa;
B9FGC2.1	Single-copy	142	231.242	48.0072	23.0814		Os04g0535000 protein			A0A0P0WHN4.1(76.3);B7FA83.1(72.7);B7E3R6.1(72.6);A0A0P0VH84.1(69.6);A0A0P0XQP9.1(69.1);A0A0P0X6N9.1(65.4);Q2QYH5.2(36.6);Q0ITT4.1(33.2);	Ankyrin repeat;Ankyrin repeat-containing domain;Ankyrin repeat-containing domain superfamily;
A0A0P0WVS0.1	Single-copy	120	23.8199	104.335	23.0752		Os06g0288650 protein			Q5QNL2.1(15.6);Q7XIE0.1(14.3);A0A0P0X1B1.1(10.3);	DNA polymerase delta subunit 3;DNA polymerase delta subunit 3 superfamily;Mediator complex, subunit Med31;Mediator complex, subunit Med31 domain superfamily;Protein of unknown function DUF707;
Q69K56.1	Homologous	129	35.2724	76.2124	22.9447	Q337Z8.1(68.8);A0A0N7KHS5.1(66.1);A0A0P0WPD5.1(65.4);A0A0P0WPW4.1(62.5);Q10RG2.1(60.2);Q94GP7.1(60.1);	Os06g0199402 protein	Protein of unknown function DUF1677, plant;		A0A0P0V847.1(118.9);Q6H530.1(115.3);Q5QN00.1(114.0);A0A0P0UZB5.1(98.6);A0A0P0WXZ6.1(92.2);Q84MQ2.1(88.7);	Protein of unknown function DUF1677, plant;
A0A0P0XI96.1	Single-copy	115	27.2903	86.5817	22.9237		Os08g0554800 protein			Q6ZFW2.1(15.8);A0A0N7KPB8.1(11.5);Q2QLX8.1(11.0);	BAG domain;BAG domain superfamily;Molecular chaperone regulator BAG;Protein of unknown function DUF1677, Oryza sativa;Ubiquitin domain;Ubiquitin-like domain superfamily;
Q69XN7.1	Single-copy	80	24.6531	95.8113	22.9184		Os06g0620000 protein			Q69PR5.1(15.3);	Leucine-rich repeat domain superfamily;NB-ARC;P-loop containing nucleoside triphosphate hydrolase;Rx, N-terminal;Virus X resistance protein-like, coiled-coil domain;
Q8GVV6.1	Homologous	121	565.583	38.3529	22.9149	Q2HWG1.1(229.6);Q2HWG0.1(225.5);Q6H468.1(116.0);Q2HWH1.1(114.3);Q6K9T0.1(113.7);	Two-component response regulator ORR8	CheY-like superfamily;Signal transduction response regulator, receiver domain;		Q0D3B6.1(76.3);Q5SML5.1(73.4);Q689G6.1(72.2);Q10N34.1(71.9);Q6K8X6.1(70.5);Q8H7S7.1(69.3);Q5N6V8.2(67.9);Q6H805.1(65.9);Q67W50.1(61.1);	CCT domain;CheY-like superfamily;Homeobox-like domain superfamily;Myb domain;Myb domain, plants;Response regulator B-type, plant;SANT/Myb domain;Signal transduction response regulator, receiver domain;
Q94GP7.1	Homologous	136	28.0666	84.9169	22.9117	A0A0N7KHS5.1(106.5);A0A0P0WPD5.1(97.6);Q337Z8.1(95.2);Q10RG2.1(86.7);A0A0P0WPW4.1(65.3);Q69K56.1(59.7);	Expressed protein	Protein of unknown function DUF1677, plant;		Q6H530.1(114.2);A0A0P0UZB5.1(96.7);A0A0P0WXZ6.1(90.8);	Protein of unknown function DUF1677, plant;
A0A0P0VL30.1	Homologous	79	36.4822	75.1405	22.8289	A0A0P0V521.1(48.0);	Os02g0594232 protein			Q941U5.1(13.8);Q5Z5X8.1(13.6);	Putative S-adenosyl-L-methionine-dependent methyltransferase;S-adenosyl-L-methionine-dependent methyltransferase;
A0A0P0W752.1	Single-copy	72	47.0555	69.3861	22.8058		Os04g0137001 protein			Q5W727.1(14.1);Q6Z1Y4.1(11.7);Q2QU43.1(10.2);	Alpha/Beta hydrolase fold;Cathepsin propeptide inhibitor domain (I29);Cysteine peptidase, asparagine active site;Cysteine peptidase, cysteine active site;Cysteine peptidase, histidine active site;EF-Hand 1, calcium-binding site;Nicalin;Nicastrin;Papain-like cysteine endopeptidase;Papain-like cysteine peptidase superfamily;Peptidase C1A, papain C-terminal;Peptidase S10, serine carboxypeptidase;Ser…
A0A0P0Y8J4.1	Single-copy	103	57.863	65.6301	22.7088		Os12g0240850 protein			A0A0P0WE81.1(37.6);Q7XVG8.2(13.1);Q6ESE5.1(12.8);	Glycoside hydrolase family 17;Glycoside hydrolase superfamily;MFS transporter superfamily;Proton-dependent oligopeptide transporter family;
Q7EYI3.1	Single-copy	145	55.4725	66.2952	22.6563		Os07g0483400 protein			Q7XIR7.1(16.5);Q6ZKF1.1(14.2);Q5QLH9.1(14.1);Q651Z1.1(12.9);A0A0P0WNH0.1(12.5);Q8S2E5.1(11.6);Q10B37.1(10.9);	Clathrin, heavy chain/VPS, 7-fold repeat;Dullard phosphatase domain, eukaryotic;FCP1 homology domain;FLC EXPRESSOR/FLX-like;HAD superfamily;HAD-like superfamily;Microtubule binding protein 2C;Pep3/Vps18/deep orange;Phosphoribosyltransferase domain;Phosphoribosyltransferase-like;Protein of unknown function DUF789;Protohaem IX farnesyltransferase;Protohaem IX farnesyltransferase, mitochondria;Ribos…
A0A0P0V3D0.1	Single-copy	117	30.3535	80.7957	22.6562		Os01g0517150 protein			A0A0P0Y013.1(30.5);	F-box domain;F-box-like domain superfamily;Leucine-rich repeat domain superfamily;Transposase, MuDR, N-terminal;
Q0E4M4.1	Single-copy	104	28.3208	83.8519	22.6517		Os02g0110500 protein			A0A0P0XL82.1(16.7);Q6I5C3.1(14.0);Q8L561.1(11.9);	Ankyrin repeat;Ankyrin repeat-containing domain;Ankyrin repeat-containing domain superfamily;PGG domain;Polyketide cyclase/dehydrase;S-phase kinase-associated protein 1;S-phase kinase-associated protein 1-like;SKP1 component, POZ domain;SKP1 component, dimerisation;SKP1-like, dimerisation domain superfamily;SKP1/BTB/POZ domain superfamily;START-like domain superfamily;
A0A0P0VH44.1	Homologous	52	614.288	37.3637	22.6304	A0A0N7KEZ6.1(85.7);A0A0P0VH48.1(80.4);Q0JNL7.1(60.5);A0A0P0W7C9.1(60.2);Q0JNS6.2(60.2);Q6F332.3(60.1);A0A0P0W6N1.1(53.5);A0A0P0W9H3.1(44.8);A0A0P0VGE2.1(39.3);A0A0P0XBK0.1(34.0);	Os02g0253601 protein			B9FKW9.1(100.2);Q6F3A6.1(96.4);Q6K968.1(95.5);Q7XSQ5.2(95.4);Q6I587.1(95.0);	EF-Hand 1, calcium-binding site;EF-hand domain;EF-hand domain pair;Protein kinase domain;Protein kinase, ATP binding site;Protein kinase-like domain superfamily;Serine/threonine-protein kinase, active site;
A0A0N7KG61.1	Homologous	116	57.2444	65.7267	22.5981	Q0JK17.1(221.3);	Os02g0771450 protein			Q53JI9.1(45.2);	Glycosyl transferase, family 1;Glycosyltransferase subfamily 4-like, N-terminal domain;HAD superfamily;Sucrose phosphate synthase, plant;Sucrose-phosphatase-like, N-terminal;Sucrose-phosphate synthase, C-terminal;
Q850Y3.1	Homologous	136	171.159	51.1397	22.5413	Q850Y8.1(140.7);Q850Y9.1(139.7);Q850Y6.1(127.7);A0A0P0WXH6.1(83.2);B7F9H9.1(44.5);	Os03g0829900 protein	PLAC8 motif-containing protein;		Q0IVQ1.1(68.3);Q10T45.1(66.7);Q9FYQ0.1(54.9);Q10RJ5.1(50.3);Q65WW0.1(41.2);Q10MQ4.1(39.8);Q94D92.1(32.6);Q2RBJ0.1(31.6);H2KW45.1(29.8);	Adaptor protein Cbl, N-terminal domain superfamily;PLAC8 motif-containing protein;Protein of unknown function DUF2985;
A0A0P0XN70.1	Single-copy	98	26.6063	87.0969	22.5302		Os09g0440850 protein			Q8H3D2.1(17.1);Q2QV94.1(12.8);	Exocyst complex component EXOC5/Sec10;Exocyst complex component Sec10-like;Longin domain;Longin-like domain superfamily;Synaptobrevin;
A0A0P0VHY2.1	Single-copy	145	177.289	50.7228	22.5162		Os02g0296700 protein	Cytochrome P450 superfamily;		Q8LIR1.1(36.3);Q8LHV0.1(34.8);B9G934.2(34.5);B9GBJ9.1(34.3);Q8LIR5.1(33.2);Q8LQ77.1(32.1);Q8L4Q4.1(31.1);A0A0P0WTY0.1(30.5);	Cytochrome P450;Cytochrome P450 superfamily;Cytochrome P450, E-class, group I;Cytochrome P450, conserved site;
A0A0P0VGR0.1	Single-copy	117	353.13	43.1145	22.4776		Os02g0228151 protein			Q5Z7H5.1(59.5);Q6H5Y7.1(49.4);Q5W675.1(39.0);Q53KU9.1(35.2);Q5JKV7.1(33.4);Q69PR8.1(22.1);Q10LT7.1(22.0);Q7XHL0.1(21.5);	Concanavalin A-like lectin/glucanase domain superfamily;Gnk2-homologous domain;Gnk2-homologous domain superfamily;Legume lectin domain;Leucine-rich repeat;Leucine-rich repeat domain superfamily;Leucine-rich repeat, typical subtype;Leucine-rich repeat-containing N-terminal, plant-type;Protein kinase domain;Protein kinase, ATP binding site;Protein kinase-like domain superfamily;S-receptor-like seri…
Q7F901.1	Homologous	114	168.797	51.2659	22.4749	A3BKL9.1(47.7);A0A0P0XYZ3.1(45.5);Q69IP8.1(40.3);	OSJNBb0033P05.15 protein			Q0IMG9.2(47.1);Q10NB2.1(35.1);Q5VRH9.1(31.5);Q6EUK7.1(28.0);A0A0P0X147.1(26.9);	Armadillo;Armadillo-like helical;Armadillo-type fold;U box domain;Zinc finger, RING/FYVE/PHD-type;
A0A0P0X345.1	Single-copy	105	74.9643	61.5162	22.4722		Os07g0170049 protein			Q6ZF50.1(52.2);A0A0N7KN00.1(43.4);Q7XDQ8.1(27.0);Q5SMM7.1(26.7);Q10CW5.1(22.2);Q0D3U9.1(14.1);	NAD(P)-binding domain superfamily;Short-chain dehydrogenase/reductase SDR;Short-chain dehydrogenase/reductase, conserved site;
A0A0P0WK94.1	Homologous	65	626.853	37.06	22.4273	A0A0P0XEW4.1(72.6);	Os05g0267850 protein			A0A0P0WH66.1(112.1);Q7XXN4.1(83.0);Q7XPK7.1(77.9);Q7XXN5.1(71.8);Q8LMI4.1(48.9);Q338X7.1(47.6);Q10QS0.1(45.0);Q2R0K3.1(41.0);Q2R0J4.1(40.7);Q69P55.1(31.3);	Chloramphenicol acetyltransferase-like domain superfamily;Transferase;
A0A0P0W542.1	Single-copy	85	53.8665	66.6082	22.409		Os03g0829333 protein			A0A0P0VZ57.1(14.0);Q5ZBW3.1(13.4);Q6H599.1(11.0);Q69TI8.1(10.9);	DNA2/NAM7 helicase, AAA domain;DNA2/NAM7 helicase-like, AAA domain;Glycosyl transferase, family 31;P-loop containing nucleoside triphosphate hydrolase;Protein LOW PSII ACCUMULATION 1-like;Protein of unknown function DUF4228, plant;Tetratricopeptide repeat;Tetratricopeptide repeat 1;Tetratricopeptide repeat-containing domain;Tetratricopeptide-like helical domain superfamily;
A0A0P0Y8V3.1	Single-copy	93	126.548	54.6098	22.3582		Os12g0271800 protein			Q6Z011.1(48.6);A0A0P0Y5P8.1(43.3);	Leucine-rich repeat;Leucine-rich repeat domain superfamily;NB-ARC;P-loop containing nucleoside triphosphate hydrolase;Rx, N-terminal;Virus X resistance protein-like, coiled-coil domain;
A0A0P0V5D3.1	Single-copy	47	193.972	49.6191	22.3576		Os01g0619900 protein			Q7F3D6.1(18.4);Q69JE8.1(18.2);Q10KS8.1(16.6);B9G9P9.1(16.5);Q6K1S6.1(16.4);Q7XDC7.1(16.4);Q8LLP3.1(16.3);Q5TKI8.1(16.0);A0A0N7KC94.1(15.9);Q7XBH4.2(15.6);	Homeobox-like domain superfamily;Myb domain;Myb-like transcription factor;SANT/Myb domain;
A0A0P0WSY9.1	Single-copy	70	37.8332	73.6571	22.3376		Os06g0170833 protein			Q8S1V1.1(12.9);Q67V82.1(12.8);Q0E436.1(11.2);	Aspartic peptidase A1 family;Aspartic peptidase domain superfamily;Peptidase family A1 domain;Protein of unknown function DUF1677, Oryza sativa;Protein of unknown function DUF4228, plant;Xylanase inhibitor I-like;Xylanase inhibitor, C-terminal;Xylanase inhibitor, N-terminal;
A0A0P0XTJ1.1	Single-copy	84	39.8633	72.4071	22.3191		Os10g0194400 protein			A3BSX3.1(12.7);Q10N79.1(12.6);Q2RB54.1(12.4);	ArgJ beta chain, C-terminal domain;ArgJ-like domain superfamily;Arginine biosynthesis protein ArgJ;Glycosyl transferase, family 8;Nucleotide-diphospho-sugar transferases;Plant galacturonosyltransferase GAUT;Protein of unknown function DUF761, plant;
Q0DKC6.1	Single-copy	101	464.982	40.1069	22.2779		MCM domain-containing protein			Q2QNM1.1(68.9);Q5JKB0.2(66.1);Q6F353.1(61.9);Q2R482.1(61.4);Q6KAJ4.1(59.9);Q69QA6.1(42.7);B9FKM7.1(38.0);	AAA+ ATPase domain;DNA replication licensing factor Mcm2;DNA replication licensing factor Mcm5;DNA replication licensing factor Mcm6;DNA replication licensing factor Mcm7;MCM N-terminal domain;MCM OB domain;MCM domain;MCM, AAA-lid domain;Mcm6, C-terminal winged-helix domain;Mini-chromosome maintenance complex protein 4;Mini-chromosome maintenance protein;Mini-chromosome maintenance, conserved sit…
A0A0P0VIP2.1	Homologous	89	47.4345	68.7506	22.2375	A0A0P0X0L5.1(33.7);	Os02g0459001 protein			A0A0P0WIM0.1(13.1);Q8H811.1(12.8);A0A0P0XV54.1(12.7);A0A0N7KT99.1(10.5);	Alpha/Beta hydrolase fold;Leucine-rich repeat;Leucine-rich repeat domain superfamily;Leucine-rich repeat-containing N-terminal, plant-type;Peptidase S10, serine carboxypeptidase;Protein kinase domain;Protein kinase, ATP binding site;Protein kinase-like domain superfamily;Serine carboxypeptidases, histidine active site;
C7J481.1	Single-copy	138	155.633	52.0783	22.2253		START domain-containing protein	START-like domain superfamily;START domain;		Q6ZAR0.1(28.1);A3BPF2.1(25.1);Q0J9X2.1(23.3);Q5ZAY0.1(18.3);Q7Y0V9.2(16.7);Q6EPF0.1(14.4);Q69T58.2(13.8);	Helix-turn-helix motif;Homeobox domain;Homeobox, conserved site;Homeobox-leucine zipper protein GLABRA2/ANL2/PDF2/ATML1-like;Homeobox-like domain superfamily;START domain;START-like domain superfamily;
Q0J6W4.1	Single-copy	149	22.6229	110.087	22.2194		Os08g0259100 protein			Q6YVY6.1(16.4);Q7XPY5.2(12.6);Q6F2U9.1(11.0);	Aminoacyl-tRNA synthetase, class II;Aminoacyl-tRNA synthetase, class II (D/K/N);Bacterial/eukaryotic lysine-tRNA ligase, class II;Ethylene-responsive binding factor-associated repression;Glycoside hydrolase family 1;Glycoside hydrolase superfamily;Jas TPL-binding domain;Lysine-tRNA ligase, class II;Lysyl-tRNA synthetase, class II, C-terminal;Ninja family;Nucleic acid-binding, OB-fold;OB-fold nucl…
A0A0P0VXU9.1	Single-copy	145	37.4089	73.7924	22.2093		Os03g0366525 protein			Q8LIY8.1(12.0);Q6ZF85.1(11.9);Q6ZDE3.1(11.8);	Carotenoid oxygenase;Cellulose synthase;Cytochrome P450;Cytochrome P450 superfamily;Cytochrome P450, E-class, group I;Cytochrome P450, conserved site;Nucleotide-diphospho-sugar transferases;
A0A0P0VBB7.1	Homologous	142	353.035	42.9838	22.1981	A0A0P0XXC4.1(206.3);	DOG1 domain-containing protein			Q53Q70.1(117.0);Q2QXL0.1(108.9);Q5N7C7.1(107.1);Q6F2N0.1(102.5);A0A0P0WFC8.1(94.0);A0A0P0WNV7.1(88.7);Q6H434.1(87.0);Q6ZBS8.1(85.7);Q69T21.1(71.1);Q0E342.2(28.4);	Basic-leucine zipper domain;Transcription factor TGA like domain;
Q94GX9.1	Single-copy	95	49.7771	67.7821	22.1398		Os10g0509501 protein			Q5N7N1.1(12.9);A0A0P0XQP1.1(12.2);Q75HC2.2(12.2);	Argonaute linker 2 domain;Argonaute, linker 1 domain;Multi antimicrobial extrusion protein;PAZ domain;PAZ domain superfamily;Piwi domain;Protein argonaute, N-terminal;Ribonuclease H superfamily;Ribonuclease H-like superfamily;
A0A0P0WWJ9.1	Homologous	79	23.3519	99.0494	22.1397	B9FPC3.1(46.5);	Os06g0331500 protein			Q10ML5.1(13.6);	BRCT domain;BRCT domain superfamily;Zinc finger, FYVE/PHD-type;Zinc finger, PHD-finger;Zinc finger, PHD-type;Zinc finger, RING/FYVE/PHD-type;
C7IYB7.1	Single-copy	131	56.1236	65.6901	22.1065		rRNA adenine N(6)-methyltransferase			Q6H400.1(20.3);Q8LQ74.1(16.4);A3BMN9.1(12.0);Q6I587.1(10.8);Q0DEH4.1(10.0);	AUX/IAA domain;AUX/IAA protein;EF-Hand 1, calcium-binding site;EF-hand domain;EF-hand domain pair;Malonyl-CoA decarboxylase;Malonyl-CoA decarboxylase, C-terminal;Malonyl-CoA decarboxylase, C-terminal domain superfamily;Malonyl-CoA decarboxylase, N-terminal;Malonyl-CoA decarboxylase, N-terminal domain superfamily;Methyltransferase domain 25;PB1 domain;Protein arginine N-methyltransferase;Protein k…
A0A0N7KHM3.1	Homologous	109	311.607	44.2743	22.1007	A0A0P0WNG0.1(59.4);	NAF domain-containing protein	NAF/FISL domain;NAF domain;		Q5JLQ9.1(44.2);Q9LWM4.1(44.0);Q60EY8.1(43.9);Q5W736.1(39.7);Q0JI49.1(36.3);Q6ERS4.1(35.1);Q7X996.1(34.9);Q5QNM6.1(34.5);Q5JLS2.1(34.5);Q6H7U5.1(34.1);	NAF domain;NAF/FISL domain;Protein kinase domain;Protein kinase, ATP binding site;Protein kinase-like domain superfamily;Serine/threonine-protein kinase, active site;
A0A0P0WYW7.1	Homologous	125	23.0661	100.969	22.0688	Q67VR4.1(49.1);	Os06g0626950 protein			A0A0N7KUB6.1(40.7);Q6Z2L2.1(32.1);	Basic leucine-zipper, C-terminal;Basic-leucine zipper domain;G-box binding protein, multifunctional mosaic region;
A0A0P0X035.1	Single-copy	124	25.3193	89.0758	22.0467		Os06g0682850 protein			A0A0P0X2V9.1(11.9);A0A0P0XB47.1(11.7);	DYW domain;Pentatricopeptide repeat;Protein of unknown function DUF1517;Tetratricopeptide-like helical domain superfamily;
A8R3Q5.1	Homologous	120	31.8615	78.045	22.0142	Q94DX8.1(49.5);Q6Z6T2.1(32.0);	CLE family OsCLE508 protein	CLAVATA3/ESR (CLE)-related protein 9/10/11/12/13;		Q2QW44.3(16.1);Q8S7W9.1(12.5);A0A0P0WY66.1(10.6);	Helix-turn-helix motif;Homeobox domain;Homeobox, conserved site;Homeobox-like domain superfamily;Homeodomain, ZF-HD class;Leucine zipper, homeobox-associated;VWA-Hint protein, Vwaint domain;ZF-HD homeobox protein, Cys/His-rich dimerisation domain;von Willebrand factor A-like domain superfamily;von Willebrand factor, type A;
A0A0N7KSI1.1	Homologous	89	1021.25	31.8382	21.9954	A0A0P0XZG4.1(114.1);A0A0P0Y3H3.1(34.0);	Os11g0172400 protein			Q2R2D5.1(115.8);Q6K7X3.1(111.7);Q6YUZ6.1(110.2);Q9LGI5.1(108.7);Q5ZD75.1(107.6);A3BG45.1(107.4);A0A0P0VDQ9.1(105.3);	Leucine-rich repeat;Leucine-rich repeat domain superfamily;Leucine-rich repeat, typical subtype;Leucine-rich repeat-containing N-terminal, plant-type;Protein kinase domain;Protein kinase, ATP binding site;Protein kinase-like domain superfamily;Serine/threonine-protein kinase, active site;
A0A0P0V2J4.1	Single-copy	99	46.2133	68.9949	21.9465		Os01g0357500 protein			Q10C31.1(14.9);Q10RT4.1(12.7);Q0DNV6.1(11.6);Q6YXX3.1(10.2);	4-hydroxy-3-methylbut-2-enyl diphosphate reductase;Nucleolar protein 8, RNA recognition motif;Nucleotide-binding alpha-beta plait domain superfamily;Protein of unknown function DUF1997;Protein of unknown function PDDEXK-like;RNA recognition motif domain;RNA-binding domain superfamily;
A0A0P0V366.1	Homologous	118	260.901	46.1212	21.9422	Q2R0M7.1(49.8);	Os01g0509800 protein			Q7XDM8.1(109.2);Q7X6N0.1(109.0);Q6KAI2.1(103.3);Q6K6B3.1(90.6);Q84Z95.1(84.7);Q5VP33.1(37.3);Q652E9.1(33.9);A0A0P0VP97.1(33.8);	GDSL lipase/esterase;GDSL lipase/esterase-like, plant;SGNH hydrolase superfamily;
Q0J7D7.1	Homologous	117	404.804	41.4	21.9269	A0A0P0WJU3.1(85.3);A0A0P0WEZ8.1(80.6);B7EDI5.1(80.5);A0A0P0WJZ9.1(71.9);	Os08g0201500 protein			A0A0P0WET4.1(111.5);A0A0N7KJP8.1(94.1);Q6EUF7.1(40.7);A0A0P0WKH3.1(26.9);Q6EQG8.1(25.9);Q10LZ2.1(17.0);Q6EUQ1.1(15.0);A0A0P0Y0Y5.1(12.0);	Leucine-rich repeat;Leucine-rich repeat domain superfamily;Leucine-rich repeat, typical subtype;Leucine-rich repeat-containing N-terminal, plant-type;Malectin domain;Protein kinase domain;Protein kinase, ATP binding site;Protein kinase-like domain superfamily;Serine-threonine/tyrosine-protein kinase, catalytic domain;Serine/threonine-protein kinase, active site;
A0A0P0V4F6.1	Homologous	142	122.865	54.7113	21.8895	Q53PQ3.1(226.6);A3BFW9.1(118.1);	TPP_enzyme_N domain-containing protein	Thiamin diphosphate-binding fold;Thiamine pyrophosphate enzyme, N-terminal TPP-binding domain;		Q9LGL5.1(108.1);Q6K2E8.1(22.9);A0A0P0YA12.1(14.3);Q7XKQ8.2(14.2);Q2QQ90.1(11.9);	Acetolactate synthase large subunit, TPP binding domain;Acetolactate synthase, large subunit, biosynthetic;DHS-like NAD/FAD-binding domain superfamily;Protein of unknown function DUF247, plant;Thiamin diphosphate-binding fold;Thiamine pyrophosphate (TPP)-dependent enzyme;Thiamine pyrophosphate enzyme, C-terminal TPP-binding;Thiamine pyrophosphate enzyme, N-terminal TPP-binding domain;Thiamine pyr…
A0A0P0VB63.1	Single-copy	84	22.7976	101.637	21.873		Os01g0880501 protein			Q94CU7.1(13.8);Q6ZIK7.1(12.2);	Brevis radix (BRX) domain;Forkhead-associated (FHA) domain;Late embryogenesis abundant protein, LEA_2 subgroup;Transcription factor BREVIS RADIX, N-terminal domain;
A0A0N7KLC0.1	Homologous	143	235.144	47.221	21.8612	C7IZN4.1(57.7);	CRC domain-containing protein	CRC domain;Lin-54 family;Tesmin/TSO1-like CXC domain;		Q2QMG6.1(114.7);Q5JMF9.1(96.3);Q6Z253.1(92.0);A0A0P0WWF9.1(80.9);Q6L4W5.1(71.7);Q2QMG8.1(68.4);	CRC domain;Lin-54 family;Tesmin/TSO1-like CXC domain;
A0A0P0V662.1	Single-copy	86	43.0153	70.2733	21.8015		Os01g0661601 protein			Q10S45.1(17.7);Q84PB7.1(14.9);Q10JT5.1(14.5);A0A0P0VYA7.1(14.3);	Ankyrin repeat;Ankyrin repeat-containing domain;Ankyrin repeat-containing domain superfamily;Histone-fold;Protein Thf1;SAC3/GANP/THP3;Transcription initiation factor TAFII31;
A0A0P0VVZ2.1	Homologous	75	24.9332	89.3187	21.7781	A0A0P0VXB9.1(145.7);A0A0P0WY00.1(60.5);	Os03g0270900 protein			A0A0P0Y7Q0.1(17.0);	Protein kinase domain;Protein kinase-like domain superfamily;Rossmann-like alpha/beta/alpha sandwich fold;Serine/threonine-protein kinase, active site;UspA;
B9F9X3.1	Single-copy	87	30.1901	79.4943	21.767		Os03g0641900 protein			Q6H601.2(12.6);Q9FWT5.1(12.0);Q69MD4.1(10.4);	DEAD/DEAH box helicase domain;Helicase superfamily 1/2, ATP-binding domain;Helicase, C-terminal;Kiwellin-like;P-loop containing nucleoside triphosphate hydrolase;Protein MIZU-KUSSEI 1-like, plant;RNA helicase, DEAD-box type, Q motif;RlpA-like domain superfamily;
Q0DRM0.1	Single-copy	98	508.34	38.9245	21.7553		Os03g0371400 protein			Q10KT5.1(95.9);A0A0P0X5J7.1(93.2);Q8LHV0.1(90.5);Q8LIR5.1(89.1);A0A0P0WTY0.1(88.2);Q8LQ77.1(86.3);Q8LIR1.1(86.2);Q8L4Q4.1(85.6);	Cytochrome P450;Cytochrome P450 superfamily;Cytochrome P450, E-class, group I;Cytochrome P450, E-class, group IV;Cytochrome P450, conserved site;
A0A0N7KTG0.1	Homologous	65	25.0788	88.7631	21.748	A0A0P0XE87.1(80.8);Q0E1G4.1(60.9);	Os12g0107300 protein			Q7XM41.2(14.2);	AAA+ ATPase domain;ABC transporter type 1, transmembrane domain;ABC transporter type 1, transmembrane domain superfamily;ABC transporter, conserved site;ABC transporter-like;P-loop containing nucleoside triphosphate hydrolase;
Q69UY7.1	Single-copy	149	27.8421	82.704	21.7394		Os06g0329300 protein			Q6H400.1(17.8);Q6Z2J2.1(17.4);Q84ZM7.1(14.9);A0A0P0VC55.1(12.2);	Ccc1 family;Malonyl-CoA decarboxylase;Malonyl-CoA decarboxylase, C-terminal;Malonyl-CoA decarboxylase, C-terminal domain superfamily;Malonyl-CoA decarboxylase, N-terminal;Malonyl-CoA decarboxylase, N-terminal domain superfamily;Multi antimicrobial extrusion protein;Uncharacterized protein At3g17950-like;
Q8H5I5.1	Homologous	111	83.5319	59.5198	21.6854	A0A0P0V321.1(86.0);A0A0P0V4C1.1(39.0);	DUF630 domain-containing protein	Domain of unknown function DUF630;		Q9AQW1.1(36.8);Q0JLN8.1(17.5);Q0IZV2.1(13.9);	Domain of unknown function DUF630;Domain of unknown function DUF632;Nitrate regulatory gene2 protein;
Q67J27.1	Homologous	105	475.103	39.5819	21.6516	Q67J26.1(108.2);Q0JNL7.1(63.5);Q6F332.3(62.2);Q0JNS6.2(62.1);A0A0P0VYA3.1(50.1);Q8RYJ8.1(47.7);Q84VG0.1(36.7);Q6YYX3.1(36.1);Q2QYW1.1(35.0);Q2RAN7.1(30.3);	Os09g0458800 protein	EF-hand domain pair;EF-Hand 1, calcium-binding site;EF-hand domain;		B9FKW9.1(109.8);Q5VQQ5.1(109.4);A2ZVI7.1(103.5);Q6I587.1(102.7);Q7XSQ5.2(101.6);Q2QY37.1(101.5);	EF-Hand 1, calcium-binding site;EF-hand domain;EF-hand domain pair;Protein kinase domain;Protein kinase, ATP binding site;Protein kinase-like domain superfamily;Serine/threonine-protein kinase, active site;
A0A0P0VCQ0.1	Single-copy	123	270.342	45.5846	21.6433		ANTH domain-containing protein	AP180 N-terminal homology (ANTH) domain;ENTH/VHS;		Q60EC1.1(76.2);Q8LJJ6.1(49.4);Q65XV1.1(43.4);Q10NB4.1(39.6);Q0DG77.1(27.3);Q60EC2.1(25.7);Q5N9P9.1(24.6);Q6EUQ6.1(24.4);A0A0P0X0S0.1(18.7);	AP180 N-terminal homology (ANTH) domain;ENTH domain;ENTH/VHS;Phosphoinositide-binding clathrin adaptor, domain 2;SWEET sugar transporter;
A0A0P0X666.1	Homologous	115	174.449	50.4539	21.6407	Q67V00.1(105.3);P0CH34.1(89.4);P0CH35.1(89.4);	Ribosomal_L40e domain-containing protein			Q84M51.1(49.4);Q6K881.1(45.1);Q6I5E0.1(39.4);Q40742.2(37.9);Q5Z885.1(36.4);A0A0P0V079.1(32.5);	Heat shock chaperonin-binding;Myb/SANT-like domain;Phosphatidylinositol 3-/4-kinase, catalytic domain;Protein kinase-like domain superfamily;UBA-like superfamily;UV excision repair protein Rad23;Ubiquitin domain;Ubiquitin-associated domain;Ubiquitin-like domain superfamily;XPC-binding domain;XPC-binding domain superfamily;
A0A0P0X8D6.1	Single-copy	141	22.4026	102.301	21.5502		Os07g0587250 protein			Q2QTN6.2(14.2);Q6K718.1(12.2);	Coilin;Protein kinase domain;Protein kinase-like domain superfamily;Serine-threonine/tyrosine-protein kinase, catalytic domain;
A0A0P0X5N5.1	Homologous	127	551.843	37.9536	21.5172	A0A0N7KDP0.1(38.1);Q0DAN9.1(33.3);	Os07g0291750 protein			Q6YUY8.1(119.6);A0A0P0XMS3.1(118.7);Q6ZD83.1(117.7);A0A0P0XAP4.1(117.6);Q0JL26.1(116.8);Q8S1C7.1(116.6);Q7XE28.1(116.0);A0A0P0XPF8.1(115.9);B7F9W3.1(115.5);A3BWN0.1(115.3);	Cytochrome P450;Cytochrome P450 superfamily;Cytochrome P450, E-class, group I;Cytochrome P450, conserved site;
A0A0P0W014.1	Single-copy	89	103.086	56.6112	21.4105		Os03g0605350 protein			Q9SXF8.2(15.3);Q6EU94.1(15.0);Q7XSQ9.3(14.8);Q8GRI8.1(13.5);Q8GRT8.1(13.3);Q7XLR1.2(13.0);Q8H5N9.1(12.6);Q6K215.1(11.9);Q7XUA6.1(11.9);Q7Y1E6.1(11.2);	Aquaporin transporter;Aquaporin-like;Major intrinsic protein;Major intrinsic protein, conserved site;
O81277.1	Homologous	102	57.1366	64.8637	21.3887	Q0IUL4.1(93.2);Q2R2M5.1(35.4);	Phytosulfokines 5	Phytosulfokine;		Q6ZDX2.1(17.5);Q5N8V2.1(13.7);Q10PM6.1(11.5);	Armadillo;Armadillo-like helical;Armadillo-type fold;Invertase/pectin methylesterase inhibitor domain superfamily;Leucine-rich repeat;Leucine-rich repeat domain superfamily;Leucine-rich repeat, typical subtype;Leucine-rich repeat-containing N-terminal, plant-type;Pectin lyase fold;Pectin lyase fold/virulence factor;Pectinesterase inhibitor domain;Pectinesterase, Asp active site;Pectinesterase, ca…
A0A0P0X3L4.1	Single-copy	137	313.729	43.8263	21.3426		Os07g0210300 protein	Rossmann-like alpha/beta/alpha sandwich fold;		Q33BK6.2(66.5);A0A0P0VRD5.1(58.7);Q336U5.2(53.0);A0A0P0X3U1.1(49.7);Q0IZH1.1(40.1);Q0DEQ5.1(29.3);Q5Z7K5.1(22.9);	Cullin repeat-like-containing domain superfamily;Exocyst complex component Exo70;Protein kinase domain;Protein kinase, ATP binding site;Protein kinase-like domain superfamily;Rossmann-like alpha/beta/alpha sandwich fold;Serine/threonine-protein kinase, active site;U box domain;UspA;Zinc finger, RING/FYVE/PHD-type;
A0A0P0V3T6.1	Single-copy	95	21.3901	122.943	21.2833		Os01g0548500 protein			A0A0P0VEJ5.1(15.7);	PB1 domain;Protein NLP, PB1 domain;RWP-RK domain;
A0A0P0V359.1	Single-copy	144	321.716	43.4765	21.1831		Os01g0388101 protein			Q6Z6D6.1(118.3);Q69XM6.1(117.4);Q8LIF2.1(107.2);Q9FDZ1.1(59.7);A0A0P0V5H7.1(54.5);Q9AX23.1(53.0);B7F9W3.1(52.6);A0A0P0V5J0.1(49.7);Q5ZBB7.1(47.3);	Cytochrome P450;Cytochrome P450 superfamily;Cytochrome P450, E-class, group I;Cytochrome P450, conserved site;
A0A0P0XGS2.1	Single-copy	86	73.8024	60.8872	21.162		Os08g0425050 protein			Q6AWY1.1(21.7);Q7FA29.1(12.4);Q5QN13.1(12.4);B9GBN8.1(11.3);Q5QL93.1(11.2);	E2F Family;E2F transcription factor, CC-MB domain;E2F-DP heterodimerization region;E2F/DP family, winged-helix DNA-binding domain;GT29-like superfamiliy;Glutamine-Leucine-Glutamine, QLQ;Glycosyl transferase family 29;Growth-regulating factor;Mpv17/PMP22;NRAMP family;Sialyltransferase;WRC domain;Winged helix DNA-binding domain superfamily;Winged helix-like DNA-binding domain superfamily;
Q5VRY5.1	Single-copy	106	23.3878	92.4953	21.1569		Os01g0183666 protein			Q0J5L5.1(17.9);	Dynamin central domain;Dynamin superfamily;Dynamin, GTPase domain;Dynamin, GTPase region, conserved site;Dynamin-type guanine nucleotide-binding (G) domain;P-loop containing nucleoside triphosphate hydrolase;PH-like domain superfamily;Pleckstrin homology domain;
C7J0D8.1	Single-copy	101	679.925	35.6149	21.1546		Os03g0436766 protein	Leucine-rich repeat domain superfamily;		Q65XJ2.1(98.8);Q6YT77.1(95.8);Q7G768.1(91.7);Q0DLF7.1(90.3);Q942F3.1(87.6);Q7XDK0.2(87.6);Q2R915.1(86.5);	Leucine-rich repeat;Leucine-rich repeat domain superfamily;Leucine-rich repeat, typical subtype;Leucine-rich repeat-containing N-terminal, plant-type;Protein kinase domain;Protein kinase, ATP binding site;Protein kinase-like domain superfamily;Serine/threonine-protein kinase, active site;
A3AQE6.1	Single-copy	87	42.0148	70.1172	21.1305		Os04g0123500 protein			Q655W1.1(13.4);Q6ER42.1(12.0);Q10MQ4.1(11.2);	GLABROUS1 enhancer-binding protein family;Leucine-rich repeat domain superfamily;PLAC8 motif-containing protein;Protein kinase domain;Protein kinase-like domain superfamily;Protein of unknown function DUF2985;Serine-threonine/tyrosine-protein kinase, catalytic domain;
B9G6H6.1	Single-copy	62	25.6073	85.3226	21.0578		Os01g0234001 protein			Q6Z9I3.1(12.1);Q6K969.1(10.9);	GHMP kinase N-terminal domain;GHMP kinase, ATP-binding, conserved site;GHMP kinase, C-terminal domain;GHMP kinase, C-terminal domain superfamily;Homoserine kinase;Mitochondrial glycoprotein;Mitochondrial glycoprotein superfamily;Ribosomal protein S5 domain 2-type fold;Ribosomal protein S5 domain 2-type fold, subgroup;
A0A0N7KTS5.1	Homologous	71	333.79	43.0127	21.0448	B9GCI6.1(136.4);Q5SMU9.1(94.4);	Os12g0230301 protein	Protein of unknown function DUF247, plant;		B9F4U3.1(73.6);Q10MF5.1(45.7);Q60E19.1(45.3);A0A0P0V1U0.1(40.8);C7J661.1(37.3);Q7XKP8.1(33.3);A0A0P0XPY3.1(32.9);Q656Q9.1(30.6);	Protein of unknown function DUF247, plant;
A0A0P0XB26.1	Single-copy	117	25.6903	84.953	20.9857		Os08g0121925 protein			Q9LG63.1(18.1);Q2QRM4.1(12.4);Q0JPH5.1(12.3);	Chaperone J-domain superfamily;Co-chaperone Hsc20;Co-chaperone HscB, C-terminal oligomerisation domain;DnaJ domain;Domain of unknown function DUF659;HAT, C-terminal dimerisation domain;HscB, C-terminal domain superfamily;Protein of unknown function DUF1645, plant;Ribonuclease H-like superfamily;Zinc finger, BED-type;
A0A0P0WX40.1	Single-copy	122	37.774	72.1992	20.9555		Os06g0478900 protein			Q10Q65.1(14.8);Q6BDZ9.2(13.1);Q6ZJ48.1(10.1);	Adenylate kinase, conserved site;Adenylate kinase/UMP-CMP kinase;Isoprenoid synthase domain superfamily;NRAMP family;P-loop containing nucleoside triphosphate hydrolase;Terpene synthase, N-terminal domain;Terpene synthase, N-terminal domain superfamily;Terpene synthase, metal-binding domain;Terpenoid cyclases/protein prenyltransferase alpha-alpha toroid;
A0A0P0X3Y9.1	Single-copy	96	28.4684	80.2021	20.9247		Os07g0235400 protein			Q5ZE54.1(12.4);Q0INR6.1(11.3);	Cytochrome P450;Cytochrome P450 superfamily;Cytochrome P450, E-class, group I;Cytochrome P450, conserved site;Glycoside hydrolase, family 43;Glycosyl hydrolase, five-bladed beta-propellor domain superfamily;
Q0JLV5.1	Homologous	80	67.7143	61.9514	20.9228	Q2QX17.1(116.2);C7JAB6.1(59.2);	Protein transport protein Sec61 subunit beta	Protein transport Sec61-beta/Sbh;Protein transport protein SecG/Sec61-beta/Sbh;		Q69MD4.1(17.8);A0A0P0VRQ0.1(16.3);Q337H3.1(12.0);Q7X5X8.2(11.2);Q8S7W9.1(11.1);	1-acyl-sn-glycerol-3-phosphate acyltransferase;Aspartic peptidase A1 family;Aspartic peptidase domain superfamily;Aspartic peptidase, active site;Helix-turn-helix motif;Homeobox domain;Homeobox, conserved site;Homeobox-like domain superfamily;K Homology domain;K Homology domain, type 1;K Homology domain, type 1 superfamily;Leucine zipper, homeobox-associated;Pepsin-like domain;Peptidase family A1…
A0A0P0V7C8.1	Homologous	129	89.3917	58.1279	20.8961	A0A0P0XJF7.1(255.8);A0A0N7KR76.1(183.7);A0A0P0Y9F4.1(156.9);A0A0P0XT30.1(153.4);	Os01g0714225 protein			A0A0P0W1C4.1(52.8);A0A0P0UYZ2.1(39.2);	Reverse transcriptase domain;Reverse transcriptase zinc-binding domain;
Q6ZLI0.1	Single-copy	121	20.8627	143.706	20.8496		Os07g0590000 protein			B9FSH5.2(14.8);	Alanine-tRNA ligase, class IIc;Alanine-tRNA ligase, class IIc, anti-codon-binding domain superfamily;Alanine-tRNA ligase, eukaryota/bacteria;Alanyl-tRNA synthetase, class IIc, N-terminal;Alanyl-tRNA synthetase, class IIc, core domain;DHHA1 domain;Probable alanine--tRNA ligase, plants;Threonyl/alanyl tRNA synthetase, SAD;Threonyl/alanyl tRNA synthetase, class II-like, putative editing domain super…
A0A0P0VC62.1	Single-copy	100	33.6097	74.89	20.8337		Os01g0918500 protein			Q0E4F6.1(13.9);Q5ZAZ8.1(13.8);	Aspartic peptidase A1 family;Aspartic peptidase domain superfamily;At1g75730-like;Pepsin-like domain, plant;Peptidase family A1 domain;Xylanase inhibitor, C-terminal;Xylanase inhibitor, N-terminal;
A0A0P0X1G1.1	Single-copy	81	20.9998	118.144	20.8308		Os07g0107366 protein			Q5TKN3.1(13.8);Q8S1P4.1(13.6);	Protein of unknown function DUF502;
A0A0P0XD89.1	Homologous	80	412.825	40.6313	20.7901	A0A0P0XDE4.1(38.5);	Os08g0226100 protein	TRAF-like;		Q7F0Z3.1(74.6);A0A0P0XE17.1(67.5);A0A0P0XDJ3.1(64.0);Q8LI88.1(61.6);A0A0P0WEY4.1(60.8);Q8H3E5.1(59.2);Q10C73.1(58.1);Q8H4G2.1(47.7);Q69L94.1(46.1);	BPM, C-terminal;BTB/POZ domain;MATH/TRAF domain;SKP1/BTB/POZ domain superfamily;TRAF-like;
Q0DH85.1	Single-copy	33	525.596	38.1	20.7841		Os05g0485500 protein			Q10LZ0.1(43.7);Q69QS2.1(43.5);Q7XHW0.1(43.3);Q7F1F3.1(40.5);A0A0P0XHK0.1(34.1);Q2RB54.1(32.9);Q652K2.1(32.0);Q6K3N8.1(28.0);Q75IZ5.1(23.8);	Glycosyl transferase, family 8;Nucleotide-diphospho-sugar transferases;Plant galacturonosyltransferase GAUT;
A0A0N7KEQ9.1	Single-copy	65	39.8823	70.8277	20.7659		Os02g0160500 protein			Q5N9Q7.1(12.5);Q6ZF86.1(10.2);A0A0P0WCH5.1(10.0);	Cellulose synthase;Homeobox-like domain superfamily;Myb domain;Nucleotide-diphospho-sugar transferases;Peptidyl-tRNA hydrolase;Peptidyl-tRNA hydrolase superfamily;Peptidyl-tRNA hydrolase, conserved site;SANT/Myb domain;
A0A0P0VY46.1	Single-copy	103	22.9904	92.2621	20.7507		Os03g0343250 protein			Q69LJ7.1(15.5);	Cytochrome b245, heavy chain;EF-hand domain;EF-hand domain pair;FAD-binding 8;FAD-binding domain, ferredoxin reductase-type;Ferredoxin-NADP reductase (FNR), nucleotide-binding domain;Ferric reductase transmembrane component-like domain;Ferric reductase, NAD binding domain;NADPH oxidase Respiratory burst;Riboflavin synthase-like beta-barrel;
A0A0N7KE07.1	Single-copy	90	22.0335	97.7944	20.7457		Os01g0834250 protein			Q6ZL37.1(13.8);	Armadillo-type fold;HEAT repeat;Importin beta family;Importin repeat 4;Importin-beta, N-terminal domain;TOG domain;
A0A0P0XIF6.1	Single-copy	129	24.9723	85.8977	20.7416		Os08g0552666 protein			Q6Z3H3.1(26.5);Q6Z3I7.1(22.4);A0A0N7KSG9.1(21.6);Q6Z3H6.1(20.3);A0A0P0XI74.1(19.1);Q6Z3I6.1(16.5);	Protein of unknown function DUF241, plant;
A0A0P0WXH6.1	Homologous	113	224.738	47.1389	20.7389	Q850Y9.1(97.3);Q850Y6.1(96.2);Q850Y8.1(95.0);Q850Y3.1(73.9);B7F9H9.1(34.7);	Os06g0520733 protein			Q850Y7.1(106.6);Q0IVQ1.1(68.3);Q10T45.1(66.7);Q9FYQ0.1(54.9);Q10RJ5.1(50.3);Q65WW0.1(41.2);Q10MQ4.1(39.8);Q94D92.1(32.6);Q2RBJ0.1(31.6);H2KW45.1(29.8);	Adaptor protein Cbl, N-terminal domain superfamily;PLAC8 motif-containing protein;Protein of unknown function DUF2985;
A0A0N7KKF7.1	Single-copy	113	619.294	36.3664	20.7218		Os05g0270875 protein			A0A0P0XQ95.1(99.8);A0A0P0XQF5.1(98.3);Q6K9B1.1(93.6);A0A0N7KR97.1(89.9);Q653C9.1(89.4);Q0IZL6.1(85.1);B7EPB0.1(82.7);Q7XP38.2(70.8);	EGF-like calcium-binding domain;EGF-like calcium-binding, conserved site;EGF-like domain;EGF-type aspartate/asparagine hydroxylation site;Growth factor receptor cysteine-rich domain superfamily;Protein kinase domain;Protein kinase, ATP binding site;Protein kinase-like domain superfamily;Serine-threonine/tyrosine-protein kinase, catalytic domain;Serine/threonine-protein kinase, active site;Wall-as…
A0A0P0XUC0.1	Single-copy	112	316.622	43.3991	20.6976		Os10g0424100 protein			B9G7V2.1(78.0);Q2R115.1(72.9);B9F591.1(69.6);Q8H3E5.1(69.0);Q7XEG0.1(68.1);Q337Y6.2(65.6);Q6Z9Y0.1(64.2);Q6Z0V7.1(62.7);Q7XEG1.1(62.3);	BPM, C-terminal;BTB/POZ domain;MATH/TRAF domain;SKP1/BTB/POZ domain superfamily;TRAF-like;
Q0ISR6.1	Single-copy	84	234.186	46.6643	20.6974		Os11g0474400 protein			Q75LU9.1(34.2);A0A0N7KDT4.1(30.1);Q8H802.1(24.7);Q0DQQ3.1(17.8);Q0D624.1(17.5);Q6ZJI2.1(17.4);Q75L61.1(17.2);Q10HY1.1(17.1);Q10HY8.1(16.7);A0A0P0VRD2.1(13.6);	Multi antimicrobial extrusion protein;
A0A0P0XZ21.1	Single-copy	104	94.9154	57.2241	20.6879		HTH TFE/IIEalpha-type domain-containing protein	Transcription factor E;Transcription factor TFE/TFIIEalpha HTH domain;TFIIEalpha/SarR/Rpc3 HTH domain;Winged helix-like DNA-binding domain superfamily;Winged helix DNA-binding domain superfamily;		Q6ZB67.1(112.6);Q2RAU2.2(84.5);B9G815.1(29.5);	TFIIEalpha/SarR/Rpc3 HTH domain;Transcription factor E;Transcription factor TFE/TFIIEalpha HTH domain;Transcription initiation factor IIE subunit alpha, N-terminal;Winged helix DNA-binding domain superfamily;Zinc finger, RING/FYVE/PHD-type;
A0A0P0WTV6.1	Single-copy	109	289.68	44.3404	20.6719		Os06g0188250 protein			Q69KL0.1(54.5);Q6K4P7.1(42.6);Q69NA5.1(29.8);Q69NA4.1(23.1);A0A0P0WIJ8.1(17.4);A0A0P0XLY5.1(16.0);B9G3Q7.1(15.8);Q69L11.1(15.8);A0A0P0XNE5.1(15.3);	Chloramphenicol acetyltransferase-like domain superfamily;GPCR, family 3;Ionotropic glutamate receptor;Ionotropic glutamate receptor, plant;Leucine-binding protein domain;Periplasmic binding protein-like I;Receptor, ligand binding region;Solute-binding protein family 3/N-terminal domain of MltF;Transferase;
A0A0P0V2P5.1	Single-copy	115	29.3029	78.7304	20.6696		Os01g0381325 protein			Q65WV4.1(25.0);Q6AT89.1(14.9);	F-box associated domain, type 3;F-box associated interaction domain;F-box domain;F-box-like domain superfamily;Quinoprotein amine dehydrogenase, beta chain-like;
A0A0P0WER9.1	Homologous	79	34.8814	73.7367	20.6618	A0A0P0X7K7.1(48.1);A0A0P0X3B7.1(42.1);	CYSTM domain-containing protein			A0A0P0XVD7.1(13.5);Q69IN4.1(12.0);	Nucleotide-binding alpha-beta plait domain superfamily;RNA recognition motif domain;RNA-binding domain superfamily;VWA-Hint protein, Vwaint domain;Zinc finger, C3HC4 RING-type;Zinc finger, RING-type;Zinc finger, RING/FYVE/PHD-type;snRNP35, RNA recognition motif;von Willebrand factor A-like domain superfamily;von Willebrand factor, type A;
Q10RE6.1	Homologous	122	22.8853	92.268	20.657	C7J8G1.1(106.5);A0A0P0V9Y9.1(72.1);Q0DHC3.1(71.7);Q6Z682.1(37.1);	Allergen, putative, expressed	EPIDERMAL PATTERNING FACTOR-like protein;		Q0J238.1(13.9);Q6Z3S1.1(10.8);	Cathepsin propeptide inhibitor domain (I29);Cysteine peptidase, asparagine active site;Cysteine peptidase, histidine active site;Leucine-rich repeat;Leucine-rich repeat domain superfamily;Leucine-rich repeat-containing N-terminal, plant-type;Papain-like cysteine endopeptidase;Papain-like cysteine peptidase superfamily;Peptidase C1A, papain C-terminal;Protein kinase domain;Protein kinase-like doma…
A0A0P0VIN1.1	Single-copy	115	58.1839	64.027	20.653		Os02g0452500 protein	Sec1-like protein;Sec1-like superfamily;		Q851W1.1(26.4);Q6ZGF2.1(21.7);Q6Z3I5.1(17.0);Q6Z3H1.1(13.1);	Protein of unknown function DUF241, plant;Sec1-like protein;Sec1-like superfamily;Sec1-like, domain 2;
A0A0P0Y2J6.1	Single-copy	122	280.59	44.6721	20.649		Os11g0506700 protein			A0A0P0XZV4.1(35.4);Q10RJ4.1(26.3);Q0JBJ8.1(26.3);Q69Q33.1(25.4);Q8LNT5.1(24.9);B9FGJ2.1(24.0);Q0DL71.2(23.3);Q9ARU4.1(22.9);Q6EQ60.2(22.3);Q8GU88.1(19.3);	AAA+ ATPase domain;ABC transporter, conserved site;ABC transporter-like;ABC-2 type transporter;ABC-transporter N-terminal domain;ATP-binding cassette transporter, PDR-like subfamily G, domain 1;ATP-binding cassette transporter, PDR-like subfamily G, domain 2;P-loop containing nucleoside triphosphate hydrolase;Plant PDR ABC transporter associated;
A0A0P0XGF3.1	Single-copy	74	21.3594	103.677	20.6477		Os08g0459366 protein			Q6ZIU9.1(15.7);	EF-Hand 1, calcium-binding site;EF-hand domain;EF-hand domain pair;Protein kinase domain;Protein kinase, ATP binding site;Protein kinase-like domain superfamily;Serine/threonine-protein kinase, active site;
A0A0P0V449.1	Single-copy	129	349.73	42.2961	20.615		Os01g0561700 protein	Protein of unknown function DUF247, plant;		Q656Q9.1(85.3);A0A0P0V1U0.1(77.7);Q2QPY1.1(77.0);A0A0P0YA69.1(74.3);A0A0P0YB05.1(73.1);Q6ET10.1(72.8);A0A0P0XPY3.1(72.1);A0A0P0XEP7.1(70.2);Q7XKP8.1(68.0);	Protein of unknown function DUF247, plant;
A0A0N7KCA7.1	Single-copy	101	21.6753	99.3792	20.5848		Os01g0138000 protein			Q6Z5U7.1(12.6);Q9LG70.1(10.0);	Cullin repeat-like-containing domain superfamily;Exocyst complex component Exo70;Homeobox-like domain superfamily;Myb domain;Myb-like transcription factor;SANT/Myb domain;
A0A0P0WC63.1	Single-copy	86	21.1693	105.408	20.5729		Os04g0503000 protein			Q10SF5.1(14.1);	Malectin-like domain;Protein kinase domain;Protein kinase, ATP binding site;Protein kinase-like domain superfamily;Serine-threonine/tyrosine-protein kinase, catalytic domain;Serine/threonine-protein kinase, active site;
A0A0P0W8R7.1	Single-copy	109	32.2139	75.6807	20.5627		Os04g0346501 protein			Q0D5V1.1(19.6);Q6ZDE3.1(13.0);	Aspartic peptidase A1 family;Aspartic peptidase domain superfamily;Cytochrome P450;Cytochrome P450 superfamily;Cytochrome P450, E-class, group I;Cytochrome P450, conserved site;Pepsin-like domain, plant;Peptidase family A1 domain;Xylanase inhibitor, C-terminal;Xylanase inhibitor, N-terminal;
Q8H4F8.1	Single-copy	125	24.7835	85.8256	20.5596		Os08g0227600 protein			Q8LSQ2.1(13.7);Q6YV37.1(13.0);	AAA+ ATPase domain;ATPase family AAA domain-containing protein 3;ATPase family AAA domain-containing protein 3, domain of unknown function DUF3523;ATPase, AAA-type, conserved site;ATPase, AAA-type, core;Ankyrin repeat;Ankyrin repeat-containing domain;Ankyrin repeat-containing domain superfamily;Chromo domain;Chromo-like domain superfamily;Chromo/chromo shadow domain;P-loop containing nucleoside t…
A0A0P0X2M2.1	Single-copy	70	61.5087	63.0387	20.4622		Os07g0168900 protein			Q8L4S2.1(14.6);Q336V3.1(14.2);Q75HS3.1(10.4);A0A0P0VGQ8.1(10.3);	Achaete-scute transcription factor-related;Cytochrome P450;Cytochrome P450 superfamily;Cytochrome P450, E-class, group I;Cytochrome P450, conserved site;HAT (Half-A-TPR) repeat;Helix-loop-helix DNA-binding domain superfamily;Magnesium transporter MRS2-like;Tetratricopeptide repeat-containing domain;Tetratricopeptide-like helical domain superfamily;
Q67UQ4.1	Homologous	142	154.772	51.1704	20.4376	Q0D9H0.1(33.4);Q6Z899.1(31.8);Q6YT03.1(31.8);	J domain-containing protein	DnaJ domain;Chaperone J-domain superfamily;		Q6K850.1(80.8);Q2QX63.1(79.2);B9FHF3.1(78.1);P0DO01.1(76.0);P0DO02.1(76.0);	Chaperone DnaJ;Chaperone DnaJ, C-terminal;Chaperone J-domain superfamily;DnaJ domain;DnaJ domain, conserved site;HSP40/DnaJ peptide-binding;Heat shock protein DnaJ, cysteine-rich domain;Heat shock protein DnaJ, cysteine-rich domain superfamily;
Q5W6I8.1	Homologous	106	43.6803	68.6811	20.402	Q5W6I7.1(47.6);A0A0P0WJ47.1(38.1);Q5W6J0.1(32.7);	Os05g0206000 protein			Q653F4.1(14.5);Q8W3C9.1(12.5);B9G305.1(12.3);	Ankyrin repeat;Ankyrin repeat-containing domain;Ankyrin repeat-containing domain superfamily;Bulb-type lectin domain;Bulb-type lectin domain superfamily;EGF-like, conserved site;Glycosyl transferase, family 43;Nucleotide-diphospho-sugar transferases;PAN/Apple domain;Protein kinase domain;Protein kinase, ATP binding site;Protein kinase-like domain superfamily;S-locus glycoprotein domain;S-receptor…
A3ASK1.1	Homologous	92	117.744	54.3632	20.3837	A0A0P0W942.1(81.7);A0A0P0W8P6.1(79.0);A0A0P0W8S0.1(76.7);A0A0P0V545.1(73.8);	Terpene_synth_C domain-containing protein	Isoprenoid synthase domain superfamily;Terpene synthase, metal-binding domain;		A0A0P0VYI4.1(67.6);A0A0P0XCC9.1(48.7);Q65XJ0.1(17.9);	Isoprenoid synthase domain superfamily;Terpene cyclase-like 1, C-terminal domain;Terpene synthase, N-terminal domain;Terpene synthase, N-terminal domain superfamily;Terpene synthase, metal-binding domain;Terpenoid cyclases/protein prenyltransferase alpha-alpha toroid;Tetratricopeptide repeat;Tetratricopeptide repeat-containing domain;Tetratricopeptide-like helical domain superfamily;
A0A0P0XXQ0.1	Single-copy	95	133.108	52.8905	20.371		Os10g0559400 protein			Q7XC75.1(95.9);B7EDK8.1(26.2);Q94LP9.1(20.6);Q94LP4.1(20.0);Q7XUN0.2(17.0);Q10MY3.1(12.3);	Isopenicillin N synthase-like;Non-haem dioxygenase N-terminal domain;Oxoglutarate/iron-dependent dioxygenase;
A0A0P0W9H3.1	Homologous	44	656.253	35.5886	20.3663	A0A0P0VGE2.1(59.6);Q0JNL7.1(52.8);Q6F332.3(52.1);Q0JNS6.2(52.1);A0A0N7KEZ6.1(45.9);A0A0P0W7C9.1(45.4);A0A0P0VH44.1(44.9);A0A0P0VH48.1(43.2);A0A0P0W6N1.1(42.5);	Os04g0375400 protein			B9FKW9.1(99.9);Q6F3A6.1(96.1);Q6K968.1(95.2);Q7XSQ5.2(95.0);Q6I587.1(94.7);	EF-Hand 1, calcium-binding site;EF-hand domain;EF-hand domain pair;Protein kinase domain;Protein kinase, ATP binding site;Protein kinase-like domain superfamily;Serine/threonine-protein kinase, active site;
A0A0P0VDB3.1	Homologous	88	129.64	53.1943	20.356	A0A0P0VDA1.1(88.9);Q0JEL2.1(33.8);	Os01g0968100 protein			Q8SA01.1(112.7);Q8S9Z9.1(109.0);Q7XVG2.1(11.6);	Root cap;
Q0E1G4.1	Homologous	73	24.7155	85.4041	20.3538	A0A0P0XE87.1(64.7);A0A0N7KTG0.1(60.2);	Os02g0451900 protein			Q7XM41.2(14.2);	AAA+ ATPase domain;ABC transporter type 1, transmembrane domain;ABC transporter type 1, transmembrane domain superfamily;ABC transporter, conserved site;ABC transporter-like;P-loop containing nucleoside triphosphate hydrolase;
A0A0P0W6Z0.1	Single-copy	75	164.693	50.4	20.3341		Os04g0177500 protein			A0A0P0W2I7.1(39.5);Q65XL3.1(29.4);Q339E0.1(27.7);A0A0P0XSS8.1(27.5);	Protein of unknown function DUF3615;
A0A0P0Y747.1	Homologous	148	492.506	38.5379	20.3114	A0A0P0UYC4.1(51.7);	Os12g0155400 protein			Q2R2D4.1(118.9);Q8L4U4.1(118.6);Q6YVY8.1(118.3);Q75J19.1(115.6);B9G9U6.1(112.2);	Leucine-rich repeat;Leucine-rich repeat domain superfamily;Leucine-rich repeat, typical subtype;Leucine-rich repeat-containing N-terminal, plant-type;Protein kinase domain;Protein kinase, ATP binding site;Protein kinase-like domain superfamily;Serine-threonine/tyrosine-protein kinase, catalytic domain;Serine/threonine-protein kinase, active site;
A0A0P0W2K6.1	Single-copy	78	287.584	44.2282	20.3096		Os03g0700500 protein			Q65XL3.1(72.3);A0A0P0XSS8.1(68.9);A0A0P0W2I7.1(58.3);Q339E0.1(37.9);	Protein of unknown function DUF3615;
Q2QRM3.1	Single-copy	134	29.2228	78.2321	20.3074		Os12g0456300 protein			A0A0P0WQG4.1(15.7);Q0JJU2.1(12.0);	Chloramphenicol acetyltransferase-like domain superfamily;Endonuclease/exonuclease/phosphatase;Endonuclease/exonuclease/phosphatase superfamily;Inositol polyphosphate-related phosphatase;O-acyltransferase WSD1, C-terminal;O-acyltransferase, WSD1, N-terminal;
A0A0P0W6I1.1	Homologous	141	561.595	37.1652	20.2974	A0A0P0W6L0.1(74.5);A0A0P0XRC5.1(58.2);A0A0P0W6I7.1(54.4);	Os04g0123700 protein	Protein kinase-like domain superfamily;		Q6YX21.1(98.0);Q94DZ6.1(97.0);B7F8F0.1(92.1);Q6ZFB7.1(91.9);A0A0N7KP76.1(91.8);Q2QMD1.1(90.4);Q2QMD5.1(89.6);Q53KU9.1(89.6);	Concanavalin A-like lectin/glucanase domain superfamily;Gnk2-homologous domain;Gnk2-homologous domain superfamily;Legume lectin domain;Legume lectin, alpha chain, conserved site;Legume lectin, beta chain, Mn/Ca-binding site;Protein kinase domain;Protein kinase, ATP binding site;Protein kinase-like domain superfamily;S-receptor-like serine/threonine-protein kinase;Serine-threonine/tyrosine-protein…
[truncated: 4,501 more rows]

## Sheet: maize_cmips
ACCESSION_NAME	MIP_TYPE	LENGTH	SCORE	INSTABILITY_INDEX	INSTABILITY*SCORE	HOMOLOGUES	DESCRIPTION	INTERPRO_DOMAINS	GENE_ONTOLOGY	ANCESTORS	ANCESTOR_INTERPRO_DOMAINS	ANCESTOR_GO_DOMAINS
[truncated: 3,790 more rows]

## Sheet: sorghum_cmips
ACCESSION_NAME	MIP_TYPE	LENGTH	SCORE	INSTABILITY_INDEX	INSTABILITY*SCORE	HOMOLOGUES	DESCRIPTION	INTERPRO_DOMAINS	GENE_ONTOLOGY	ANCESTORS	ANCESTOR_INTERPRO_DOMAINS	ANCESTOR_GO_DOMAINS
[truncated: 2,534 more rows]

[truncated: 2 more sheets: wheat_cmips, barley_cmips]
