# Supplementary material
Source: publisher figshare collection journal article supplement (https://gsajournals.figshare.com/ndownloader/files/22752644)
Supplement: Supplementary file 1 [file 22752644 › Supplementary_information_3_ReviGO.xlsx]

## Sheet: Supplementary_Table_3_ReviGO
term_ID	description	frequency	plot_X	plot_Y	plot_size	log10 p-value	uniqueness	dispensability	representative	eliminated
GO:0051716	cellular response to stimulus	0.09561	null	null	6.089	-53.4815	0.821	0.68	33554	1
GO:0032774	RNA biosynthetic process	0.10925	null	null	6.147	-48.1135	0.713	0.597	16070	1
GO:0016070	RNA metabolic process	0.15951	-7.581	-0.792	6.311	-45.8861	0.746	0.459	16070	0
GO:0009056	catabolic process	0.0482	0.852	-2.553	5.791	-38.3372	0.968	0	9056	0
GO:0044248	cellular catabolic process	0.03266	-3.865	0.531	5.622	-32.6576	0.858	0.022	44248	0
GO:0032501	multicellular organismal process	0.02373	0.756	1.127	5.483	-30.1549	0.992	0	32501	0
GO:0030163	protein catabolic process	0.00997	null	null	5.107	-29.4318	0.848	0.719	44248	1
GO:0071555	cell wall organization	0.00709	2.175	1.341	4.959	-24.3979	0.841	0.039	71555	0
GO:0022414	reproductive process	0.00736	-0.187	0.359	4.975	-21.6383	0.958	0	22414	0
GO:0009057	macromolecule catabolic process	0.01953	null	null	5.399	-20.0862	0.864	0.785	44248	1
GO:0033554	cellular response to stress	0.02967	3.34	5.027	5.581	-19.3979	0.831	0.047	33554	0
GO:0000003	reproduction	0.00769	-0.113	-1.561	4.994	-19.1805	1	0	3	0
GO:0051252	regulation of RNA metabolic process	0.10029	null	null	6.109	-18.9586	0.639	0.684	16070	1
GO:0044257	cellular protein catabolic process	0.00772	null	null	4.996	-18.7447	0.814	0.936	44248	1
GO:0051603	proteolysis involved in cellular protein catabolic process	0.00759	null	null	4.988	-18.7447	0.814	0.813	44248	1
GO:0023060	(obsolete) signal transmission	0.00143	2.838	0.153	4.253	-15.9208	0.992	0	23060	0
GO:0019941	modification-dependent protein catabolic process	0.00612	null	null	4.895	-15.6778	0.817	0.985	44248	1
GO:0043632	modification-dependent macromolecule catabolic process	0.00627	null	null	4.905	-15.6778	0.833	0.866	44248	1
GO:0006511	ubiquitin-dependent protein catabolic process	0.00584	null	null	4.874	-15.6778	0.818	0.963	44248	1
GO:0035556	intracellular signal transduction	0.04	null	null	5.71	-15.6576	0.687	0.63	33554	1
GO:0070647	protein modification by small protein conjugation or removal	0.00821	-7.254	3.275	5.023	-14.4949	0.846	0.072	70647	0
GO:0071669	plant-type cell wall organization or biogenesis	0.00037	null	null	3.681	-13.2218	0.937	0.718	71555	1
GO:0044265	cellular macromolecule catabolic process	0.01268	null	null	5.211	-12.9208	0.824	0.86	44248	1
GO:0051704	multi-organism process	0.00751	1.909	-1.999	4.984	-12.2441	0.992	0	51704	0
GO:0006351	transcription, DNA-templated	0.10659	null	null	6.136	-11.8861	0.708	0.74	16070	1
GO:0048544	recognition of pollen	0.00034	null	null	3.644	-11.699	0.839	0.75	22414	1
GO:0009875	pollen-pistil interaction	0.00035	null	null	3.648	-11.699	0.898	0.969	22414	1
GO:0009856	pollination	0.00044	null	null	3.752	-11.699	0.953	0.93	22414	1
GO:0008037	cell recognition	0.00067	2.987	-6.337	3.931	-11.699	0.889	0.03	8037	0
GO:0055114	oxidation-reduction process	0.1506	1.835	-7.51	6.286	-10.7959	0.842	0.3	55114	0
GO:0018193	peptidyl-amino acid modification	0.01495	null	null	5.283	-9.7696	0.836	0.525	70647	1
GO:0044042	glucan metabolic process	0.00317	null	null	4.609	-9.585	0.864	0.81	6073	1
GO:0009664	plant-type cell wall organization	0.00028	null	null	3.559	-9.4437	0.877	0.731	71555	1
GO:0044264	cellular polysaccharide metabolic process	0.00553	null	null	4.851	-9.3979	0.824	0.851	6073	1
GO:0030243	cellulose metabolic process	0.00086	null	null	4.042	-9.1135	0.844	0.895	6073	1
GO:0006073	cellular glucan metabolic process	0.00316	-6.293	2.26	4.607	-9.0315	0.828	0.133	6073	0
GO:0016071	mRNA metabolic process	0.00798	-8.316	-1.032	5.01	-8.5686	0.82	0.146	16071	0
GO:0030244	cellulose biosynthetic process	0.00025	null	null	3.511	-8.4089	0.778	0.817	6073	1
GO:0006979	response to oxidative stress	0.00575	null	null	4.868	-8.1079	0.899	0.679	33554	1
GO:0065007	biological regulation	0.20498	0.618	-1.052	6.42	-8.0044	0.993	0	65007	0
GO:0005976	polysaccharide metabolic process	0.00906	null	null	5.065	-7.8239	0.868	0.533	6073	1
GO:0008380	RNA splicing	0.00413	-7.664	-1.241	4.725	-7.6778	0.822	0.299	8380	0
GO:0006397	mRNA processing	0.00561	null	null	4.857	-7.6198	0.817	0.624	8380	1
GO:0034622	cellular macromolecular complex assembly	0.01211	null	null	5.191	-7.5686	0.827	0.52	71555	1
GO:0010467	gene expression	0.19671	-7.531	2.724	6.402	-7.301	0.866	0.175	10467	0
GO:0016567	protein ubiquitination	0.00523	-6.865	3.255	4.827	-7.1938	0.849	0.47	16567	0
GO:0032446	protein modification by small protein conjugation	0.00607	null	null	4.891	-7.1192	0.847	0.92	16567	1
GO:0008643	carbohydrate transport	0.00682	6.38	1.254	4.942	-7.0655	0.896	0.066	8643	0
GO:0065003	macromolecular complex assembly	0.01497	null	null	5.283	-7	0.826	0.848	71555	1
GO:0048518	positive regulation of biological process	0.01744	-0.887	7.419	5.35	-6.8239	0.887	0	48518	0
GO:0022607	cellular component assembly	0.02484	null	null	5.503	-6.7959	0.829	0.739	71555	1
GO:0006518	peptide metabolic process	0.05961	-6.757	-3.63	5.884	-6.7212	0.824	0.439	6518	0
GO:0043933	macromolecular complex subunit organization	0.02371	null	null	5.483	-6.6778	0.842	0.597	71555	1
GO:0009250	glucan biosynthetic process	0.00165	null	null	4.326	-6.2757	0.745	0.943	6073	1
GO:0044085	cellular component biogenesis	0.04355	null	null	5.747	-6.2291	0.884	0.653	71555	1
GO:0042546	cell wall biogenesis	0.0064	null	null	4.915	-6.2007	0.836	0.923	71555	1
GO:0006694	steroid biosynthetic process	0.00122	null	null	4.196	-6.1427	0.806	0.612	8610	1
GO:0033692	cellular polysaccharide biosynthetic process	0.00394	null	null	4.703	-6.1192	0.727	0.915	6073	1
GO:0008610	lipid biosynthetic process	0.02123	-2.774	-6.96	5.435	-6.1135	0.769	0.092	8610	0
GO:0010604	positive regulation of macromolecule metabolic process	0.00988	-3.822	6.288	5.103	-6	0.789	0.305	10604	0
GO:0048522	positive regulation of cellular process	0.01585	null	null	5.308	-6	0.824	0.908	10604	1
GO:0009893	positive regulation of metabolic process	0.01048	null	null	5.129	-6	0.84	0.914	10604	1
GO:0050794	regulation of cellular process	0.1884	-1.278	7.012	6.383	-5.9586	0.783	0.499	50794	0
GO:0051258	protein polymerization	0.00231	null	null	4.471	-5.9208	0.85	0.789	71555	1
GO:0000271	polysaccharide biosynthetic process	0.00532	null	null	4.834	-5.8861	0.755	0.893	6073	1
GO:0050896	response to stimulus	0.1221	2.476	-1.073	6.195	-5.7959	0.993	0	50896	0
GO:0071554	cell wall organization or biogenesis	0.0095	-0.271	-0.91	5.086	-5.7447	0.945	0.04	71554	0
GO:0050789	regulation of biological process	0.19373	null	null	6.395	-5.7212	0.845	0.761	50794	1
GO:0006457	protein folding	0.00903	0.084	-0.278	5.064	-5.699	0.946	0.04	6457	0
GO:0006575	cellular modified amino acid metabolic process	0.00785	-5.501	-4.571	5.003	-5.6778	0.868	0.072	6575	0
GO:0032787	monocarboxylic acid metabolic process	0.02485	1.007	-7.701	5.504	-5.5229	0.757	0.208	32787	0
GO:0034220	ion transmembrane transport	0.03528	5.536	2.372	5.656	-5.4089	0.948	0.343	34220	0
GO:0006730	one-carbon metabolic process	0.00328	1.206	-7.512	4.625	-5.3565	0.818	0.34	6730	0
GO:0031325	positive regulation of cellular metabolic process	0.01004	null	null	5.11	-5.1805	0.79	0.979	10604	1
GO:0016043	cellular component organization	0.07239	null	null	5.968	-5.1675	0.826	0.78	71555	1
GO:0006950	response to stress	0.04575	null	null	5.769	-5.0223	0.886	0.559	33554	1
GO:0006366	transcription from RNA polymerase II promoter	0.0143	-8.031	-1.726	5.264	-5	0.775	0.34	6366	0
GO:0042744	hydrogen peroxide catabolic process	0.00093	null	null	4.078	-4.9208	0.889	0.555	44248	1
GO:0042221	response to chemical	0.03071	null	null	5.595	-4.9208	0.89	0.562	33554	1
GO:0008202	steroid metabolic process	0.00161	null	null	4.315	-4.7959	0.84	0.628	8610	1
GO:0006829	zinc II ion transport	0.00032	6.326	2.414	3.608	-4.7959	0.962	0.486	6829	0
GO:0006396	RNA processing	0.0321	-7.758	-1.045	5.615	-4.5686	0.787	0.401	6396	0
GO:0006790	sulfur compound metabolic process	0.01822	-2.848	1.748	5.369	-4.3565	0.908	0.08	6790	0
GO:0019438	aromatic compound biosynthetic process	0.16954	-7.468	-2.987	6.338	-4.3565	0.775	0.474	19438	0
GO:0006357	regulation of transcription from RNA polymerase II promoter	0.01273	-7.062	2.138	5.213	-4.2757	0.698	0.465	6357	0
GO:0044706	multi-multicellular organism process	0.00067	2.422	-3.996	3.933	-4.2366	0.97	0	44706	0
GO:0009628	response to abiotic stimulus	0.00571	3.618	5.328	4.865	-4.0757	0.907	0.425	9628	0
GO:0019748	secondary metabolic process	0.00138	2.33	-5.58	4.247	-3.7959	0.906	0.15	19748	0
GO:0065008	regulation of biological quality	0.03395	-1.086	6.857	5.639	-3.7696	0.881	0.339	65008	0
GO:0009314	response to radiation	0.00193	3.277	4.773	4.394	-3.7696	0.911	0.378	9314	0
GO:0009734	auxin-activated signaling pathway	0.00035	1.033	6.507	3.649	-3.7447	0.769	0.37	9734	0
GO:0071365	cellular response to auxin stimulus	0.00035	null	null	3.655	-3.7212	0.856	0.898	9734	1
GO:0042592	homeostatic process	0.01661	-0.957	7.131	5.329	-3.5686	0.882	0.309	42592	0
GO:0034637	cellular carbohydrate biosynthetic process	0.00478	null	null	4.787	-3.5528	0.757	0.778	6073	1
GO:0006721	terpenoid metabolic process	0.0026	null	null	4.524	-3.4815	0.815	0.659	8610	1
GO:0016050	vesicle organization	0.0013	3.585	1.378	4.221	-3.4815	0.877	0.42	16050	0
GO:0009112	nucleobase metabolic process	0.00481	-3.809	-6.286	4.791	-3.4685	0.746	0.355	9112	0
GO:0032392	DNA geometric change	0.00596	null	null	4.883	-3.4559	0.858	0.874	16050	1
GO:0032508	DNA duplex unwinding	0.0059	null	null	4.879	-3.4559	0.858	0.544	16050	1
GO:0006887	exocytosis	0.0021	null	null	4.43	-3.3468	0.844	0.865	8643	1
GO:0006725	cellular aromatic compound metabolic process	0.29628	-5.123	-0.091	6.58	-3.3098	0.864	0.134	6725	0
GO:0044283	small molecule biosynthetic process	0.05677	null	null	5.862	-3.301	0.747	0.589	8610	1
GO:0000160	phosphorelay signal transduction system	0.0257	null	null	5.518	-3.2676	0.703	0.737	33554	1
GO:0016051	carbohydrate biosynthetic process	0.01079	null	null	5.141	-3.2518	0.778	0.604	6073	1
GO:0006633	fatty acid biosynthetic process	0.00617	null	null	4.899	-3.2366	0.727	0.722	8610	1
GO:0010817	regulation of hormone levels	0.00161	null	null	4.314	-3.2366	0.906	0.621	42592	1
GO:0032940	secretion by cell	0.00763	null	null	4.991	-3.2291	0.825	0.547	8643	1
GO:0046903	secretion	0.0081	null	null	5.017	-3.2291	0.898	0.557	8643	1
GO:0006302	double-strand break repair	0.00211	null	null	4.432	-3.2147	0.767	0.608	33554	1
GO:0032270	positive regulation of cellular protein metabolic process	0.00445	null	null	4.756	-3.2147	0.759	0.899	10604	1
GO:0051247	positive regulation of protein metabolic process	0.00463	null	null	4.774	-3.2147	0.785	0.903	10604	1
GO:0006144	purine nucleobase metabolic process	0.00203	-3.889	-6.376	4.416	-3.0757	0.762	0.497	6144	0
GO:0009987	cellular process	0.6378	0.156	-2.392	6.913	-3.0315	0.997	0	9987	0
GO:0022613	ribonucleoprotein complex biogenesis	0.01614	null	null	5.316	-2.9208	0.882	0.766	71555	1
GO:0016053	organic acid biosynthetic process	0.04171	null	null	5.728	-2.8539	0.696	0.851	8610	1
GO:0046394	carboxylic acid biosynthetic process	0.04159	null	null	5.727	-2.8539	0.694	0.737	8610	1
GO:0006631	fatty acid metabolic process	0.00878	null	null	5.052	-2.8539	0.752	0.752	8610	1
GO:0032259	methylation	0.03103	3.785	-1.77	5.6	-2.7959	0.97	0.021	32259	0
GO:0051186	cofactor metabolic process	0.03985	-2.755	0.005	5.709	-2.7447	0.899	0.09	51186	0
GO:0009416	response to light stimulus	0.00157	null	null	4.304	-2.7212	0.912	0.808	9314	1
GO:0044255	cellular lipid metabolic process	0.02704	null	null	5.54	-2.6576	0.775	0.865	8610	1
GO:0042398	cellular modified amino acid biosynthetic process	0.00539	-6.13	-4.334	4.84	-2.6576	0.868	0.281	42398	0
GO:0033865	nucleoside bisphosphate metabolic process	0.00239	null	null	4.487	-2.6576	0.756	0.504	9112	1
GO:0006099	tricarboxylic acid cycle	0.00469	1.118	-7.38	4.78	-2.6383	0.781	0.489	6099	0
GO:0042254	ribosome biogenesis	0.01422	null	null	5.261	-2.6021	0.881	0.754	71555	1
GO:0006720	isoprenoid metabolic process	0.00464	null	null	4.775	-2.5229	0.81	0.7	8610	1
GO:0042445	hormone metabolic process	0.0009	null	null	4.064	-2.5086	0.899	0.588	42592	1
GO:0042743	hydrogen peroxide metabolic process	0.001	null	null	4.108	-2.4318	0.924	0.843	44248	1
GO:0006325	chromatin organization	0.00668	null	null	4.933	-2.3768	0.846	0.775	71555	1
GO:0008152	metabolic process	0.75387	0.046	2.786	6.986	-2.3565	0.998	0	8152	0
GO:0044703	multi-organism reproductive process	0.00335	null	null	4.633	-2.3468	0.954	0.911	22414	1
GO:0046417	chorismate metabolic process	0.0024	1.133	-7.907	4.489	-2.3098	0.809	0.455	46417	0
GO:0009073	aromatic amino acid family biosynthetic process	0.0054	-4.027	-6.065	4.841	-2.3098	0.729	0.496	9073	0
GO:0044036	cell wall macromolecule metabolic process	0.00709	null	null	4.959	-2.2757	0.852	0.932	71555	1
GO:0007018	microtubule-based movement	0.00287	1.534	-5.625	4.567	-2.2757	0.875	0.142	7018	0
GO:0009698	phenylpropanoid metabolic process	0.00021	-2.794	-6.345	3.431	-2.2596	0.863	0.127	9698	0
GO:0044710	single-organism metabolic process	0.31682	4.355	-5.909	6.609	-2.1938	0.881	0.163	44710	0
GO:0009605	response to external stimulus	0.0137	3.678	5.172	5.245	-2.1739	0.899	0.473	9605	0
GO:0000041	transition metal ion transport	0.00344	null	null	4.645	-2.1675	0.964	0.615	34220	1
GO:0016114	terpenoid biosynthetic process	0.00245	null	null	4.498	-2.1308	0.781	0.894	8610	1
GO:0006928	movement of cell or subcellular component	0.00973	1.725	-5.978	5.097	-2.0969	0.86	0.224	6928	0
GO:0009733	response to auxin	0.00078	null	null	4.003	-2.0757	0.884	0.752	9734	1
GO:0009060	aerobic respiration	0.00618	null	null	4.899	-2.0132	0.827	0.876	6099	1
GO:0006364	rRNA processing	0.00952	null	null	5.087	-1.9586	0.714	0.912	71555	1
GO:0007166	cell surface receptor signaling pathway	0.0092	null	null	5.072	-1.9586	0.735	0.641	33554	1
GO:0072593	reactive oxygen species metabolic process	0.00282	-0.136	0.836	4.558	-1.9586	0.924	0.064	72593	0
GO:0016072	rRNA metabolic process	0.00965	-8.365	-1.036	5.093	-1.9586	0.81	0.347	16072	0
GO:0031323	regulation of cellular metabolic process	0.11662	null	null	6.175	-1.8539	0.738	0.841	16070	1
GO:0006355	regulation of transcription, DNA-templated	0.09917	null	null	6.105	-1.8239	0.608	0.886	16070	1
GO:0043648	dicarboxylic acid metabolic process	0.01019	null	null	5.116	-1.7696	0.78	0.534	32787	1
GO:0019219	regulation of nucleobase-containing compound metabolic process	0.10258	null	null	6.119	-1.7696	0.675	0.862	16070	1
GO:0051171	regulation of nitrogen compound metabolic process	0.10926	null	null	6.147	-1.7696	0.76	0.858	16070	1
GO:0061024	membrane organization	0.00759	null	null	4.989	-1.7447	0.859	0.524	71555	1
GO:0009156	ribonucleoside monophosphate biosynthetic process	0.01394	null	null	5.253	-1.7447	0.672	0.907	9112	1
GO:0009161	ribonucleoside monophosphate metabolic process	0.02267	null	null	5.464	-1.7447	0.692	0.628	9112	1
GO:0019725	cellular homeostasis	0.01253	null	null	5.206	-1.699	0.766	0.771	42592	1
GO:0010468	regulation of gene expression	0.10815	null	null	6.142	-1.699	0.724	0.856	16070	1
GO:0016570	histone modification	0.00373	null	null	4.68	-1.6576	0.767	0.73	71555	1
GO:0016569	covalent chromatin modification	0.00424	null	null	4.736	-1.6576	0.794	0.9	71555	1
GO:0008299	isoprenoid biosynthetic process	0.00442	null	null	4.754	-1.6576	0.769	0.941	8610	1
GO:0031326	regulation of cellular biosynthetic process	0.10816	null	null	6.142	-1.6198	0.698	0.89	16070	1
GO:0010556	regulation of macromolecule biosynthetic process	0.10749	null	null	6.14	-1.6198	0.691	0.855	16070	1
GO:0009889	regulation of biosynthetic process	0.10834	null	null	6.143	-1.6198	0.753	0.856	16070	1
GO:0007017	microtubule-based process	0.00658	1.817	-6.156	4.927	-1.6021	0.865	0.214	7017	0
GO:0060255	regulation of macromolecule metabolic process	0.11716	null	null	6.177	-1.6021	0.734	0.872	16070	1
GO:0043623	cellular protein complex assembly	0.00673	null	null	4.936	-1.5686	0.835	0.879	71555	1
GO:0080090	regulation of primary metabolic process	0.11675	null	null	6.175	-1.5229	0.77	0.872	16070	1
GO:0019222	regulation of metabolic process	0.11942	null	null	6.185	-1.5086	0.83	0.698	50794	1
GO:0034645	cellular macromolecule biosynthetic process	0.19291	null	null	6.394	-1.4815	0.754	0.68	16070	1
GO:0009124	nucleoside monophosphate biosynthetic process	0.01486	null	null	5.28	-1.4559	0.669	0.914	9112	1
GO:0009123	nucleoside monophosphate metabolic process	0.02367	null	null	5.482	-1.4559	0.692	0.806	9112	1
GO:0045333	cellular respiration	0.00984	null	null	5.101	-1.4559	0.819	0.905	6099	1
GO:0048519	negative regulation of biological process	0.01984	-0.956	7.466	5.406	-1.4089	0.885	0.345	48519	0
GO:0006468	protein phosphorylation	0.04137	null	null	5.725	-1.3872	0.778	0.64	70647	1
GO:0009059	macromolecule biosynthetic process	0.19548	-7.98	0.666	6.399	-1.3565	0.814	0.345	9059	0
GO:0032268	regulation of cellular protein metabolic process	0.01473	-4.999	5.556	5.277	-1.2676	0.744	0.429	32268	0
GO:0015980	energy derivation by oxidation of organic compounds	0.01175	null	null	5.178	-1.1675	0.817	0.789	6099	1
GO:0044281	small molecule metabolic process	0.15138	1.053	-6.863	6.288	-1.1367	0.842	0.415	44281	0
GO:0009755	hormone-mediated signaling pathway	0.00175	null	null	4.352	-1.0706	0.739	0.842	9734	1
GO:0009072	aromatic amino acid family metabolic process	0.00719	null	null	4.965	-1.0605	0.759	0.536	9073	1
GO:0007049	cell cycle	0.01885	2.137	-6.82	5.384	-1	0.85	0.244	7049	0
GO:0045229	external encapsulating structure organization	0.00795	null	null	5.009	-0.9586	0.858	0.527	71555	1
GO:0032870	cellular response to hormone stimulus	0.00242	null	null	4.492	-0.9586	0.836	0.919	9734	1
GO:0071495	cellular response to endogenous stimulus	0.00402	null	null	4.712	-0.9586	0.884	0.88	9734	1
GO:0044262	cellular carbohydrate metabolic process	0.01257	null	null	5.208	-0.9208	0.862	0.627	6073	1
GO:0006310	DNA recombination	0.01641	-8.453	-0.879	5.323	-0.9208	0.808	0.271	6310	0
GO:0048523	negative regulation of cellular process	0.0183	-1.054	7.5	5.371	-0.8861	0.844	0.341	48523	0
GO:0006461	protein complex assembly	0.0096	null	null	5.091	-0.8539	0.83	0.953	71555	1
GO:0070271	protein complex biogenesis	0.00963	null	null	5.092	-0.8239	0.887	0.662	71555	1
GO:0007165	signal transduction	0.06621	null	null	5.929	-0.8239	0.667	0.847	33554	1
GO:0006857	oligopeptide transport	0.00057	null	null	3.864	-0.8239	0.959	0.854	8643	1
GO:0015833	peptide transport	0.00298	null	null	4.582	-0.8239	0.955	0.528	8643	1
GO:0046128	purine ribonucleoside metabolic process	0.01996	null	null	5.408	-0.8239	0.692	0.744	9112	1
GO:0016192	vesicle-mediated transport	0.01085	5.944	2.362	5.144	-0.8239	0.958	0.364	16192	0
GO:0023052	signaling	0.06765	1.876	-3.637	5.939	-0.7959	0.992	0	23052	0
GO:0044700	single organism signaling	0.06756	null	null	5.938	-0.7959	0.883	0.928	33554	1
GO:0009150	purine ribonucleotide metabolic process	0.02353	null	null	5.48	-0.7696	0.679	0.92	9112	1
GO:0042278	purine nucleoside metabolic process	0.02005	null	null	5.41	-0.7696	0.692	0.921	9112	1
GO:0006352	DNA-templated transcription, initiation	0.00766	-8.019	-1.853	4.992	-0.7696	0.79	0.439	6352	0
GO:0009119	ribonucleoside metabolic process	0.02521	null	null	5.51	-0.7447	0.687	0.904	9112	1
GO:0018130	heterocycle biosynthetic process	0.17388	-7.34	-2.566	6.348	-0.7447	0.776	0.477	18130	0
GO:0007154	cell communication	0.07219	0.324	1.066	5.967	-0.7212	0.931	0.054	7154	0
GO:0006163	purine nucleotide metabolic process	0.02435	null	null	5.495	-0.7212	0.682	0.945	9112	1
GO:0009058	biosynthetic process	0.31611	0.462	3.275	6.608	-0.699	0.96	0.033	9058	0
GO:0006629	lipid metabolic process	0.03522	0.281	-6.915	5.655	-0.699	0.845	0.223	6629	0
GO:1901576	organic substance biosynthetic process	0.30365	null	null	6.591	-0.699	0.841	0.558	9059	1
GO:0009259	ribonucleotide metabolic process	0.02752	null	null	5.548	-0.6778	0.683	0.923	9112	1
GO:0019752	carboxylic acid metabolic process	0.08831	null	null	6.054	-0.6576	0.715	0.781	8610	1
GO:0043436	oxoacid metabolic process	0.09006	null	null	6.063	-0.6576	0.715	0.902	8610	1
GO:0044699	single-organism process	0.46569	2.522	1.971	6.776	-0.6383	0.996	0	44699	0
GO:0034470	ncRNA processing	0.02222	null	null	5.455	-0.6383	0.784	0.773	16072	1
GO:0042180	cellular ketone metabolic process	0.00423	1.204	-7.607	4.735	-0.6198	0.81	0.35	42180	0
GO:0009116	nucleoside metabolic process	0.02917	null	null	5.573	-0.6021	0.682	0.947	9112	1
GO:0072521	purine-containing compound metabolic process	0.02673	-6.854	-3.673	5.535	-0.5686	0.828	0.334	72521	0
GO:0019693	ribose phosphate metabolic process	0.03032	null	null	5.59	-0.5686	0.816	0.719	9112	1
GO:0071310	cellular response to organic substance	0.00651	null	null	4.922	-0.5528	0.832	0.766	9734	1
GO:0044249	cellular biosynthetic process	0.30048	null	null	6.586	-0.5376	0.802	0.658	9059	1
GO:1901657	glycosyl compound metabolic process	0.02961	null	null	5.58	-0.5376	0.826	0.738	9112	1
GO:0044702	single organism reproductive process	0.00521	null	null	4.825	-0.5086	0.907	0.95	22414	1
GO:0071822	protein complex subunit organization	0.01287	null	null	5.218	-0.5086	0.836	0.854	71555	1
GO:0016310	phosphorylation	0.07764	-4.948	-0.414	5.998	-0.5086	0.847	0.158	16310	0
GO:0044237	cellular metabolic process	0.53061	-4.585	2.845	6.833	-0.5086	0.896	0.176	44237	0
GO:0023051	regulation of signaling	0.00934	null	null	5.079	-0.4949	0.875	0.636	33554	1
GO:0009966	regulation of signal transduction	0.00857	null	null	5.041	-0.4949	0.736	0.635	33554	1
GO:0006091	generation of precursor metabolites and energy	0.0194	-2.052	1.15	5.396	-0.4949	0.908	0.081	6091	0
GO:0010646	regulation of cell communication	0.00929	-0.681	7.157	5.076	-0.4949	0.837	0.386	10646	0
GO:0006520	cellular amino acid metabolic process	0.05591	null	null	5.856	-0.4685	0.709	0.825	8610	1
GO:0009725	response to hormone	0.00335	null	null	4.633	-0.4318	0.873	0.931	9734	1
GO:0006732	coenzyme metabolic process	0.03111	-3.332	0.191	5.601	-0.4202	0.896	0.086	6732	0
GO:0044260	cellular macromolecule metabolic process	0.34276	-7.479	1.76	6.643	-0.4202	0.803	0.417	44260	0
GO:0009719	response to endogenous stimulus	0.00526	3.332	4.959	4.829	-0.4089	0.907	0.421	9719	0
GO:0006855	drug transmembrane transport	0.00189	5.199	3.952	4.384	-0.3979	0.821	0.48	6855	0
GO:0042493	response to drug	0.00266	null	null	4.534	-0.3565	0.893	0.553	6855	1
GO:0015893	drug transport	0.00224	null	null	4.458	-0.3565	0.82	0.956	6855	1
GO:0009108	coenzyme biosynthetic process	0.01983	null	null	5.406	-0.3468	0.86	0.837	6732	1
GO:0051641	cellular localization	0.02041	5.284	2.212	5.418	-0.3468	0.957	0.38	51641	0
GO:0043170	macromolecule metabolic process	0.39491	-4.666	1.836	6.705	-0.3372	0.905	0.176	43170	0
GO:0051649	establishment of localization in cell	0.01679	5.294	2.255	5.333	-0.3372	0.957	0.383	51649	0
GO:0006281	DNA repair	0.02234	null	null	5.457	-0.3279	0.707	0.804	33554	1
GO:0009117	nucleotide metabolic process	0.04166	null	null	5.728	-0.3279	0.671	0.877	9112	1
GO:0006974	cellular response to DNA damage stimulus	0.0236	null	null	5.481	-0.3188	0.833	0.904	33554	1
GO:0055085	transmembrane transport	0.08916	6.474	2.32	6.058	-0.3188	0.95	0.497	55085	0
GO:0006753	nucleoside phosphate metabolic process	0.04207	null	null	5.732	-0.3098	0.673	0.903	9112	1
GO:0070887	cellular response to chemical stimulus	0.01007	null	null	5.111	-0.3098	0.836	0.641	6855	1
GO:0006082	organic acid metabolic process	0.09086	null	null	6.067	-0.301	0.729	0.608	8610	1
