# Supplementary material
Source: publisher figshare collection journal article supplement (https://gsajournals.figshare.com/ndownloader/files/22752644)
Supplement: Supplementary file 1 [file 22752644 › Supplementary_information_4_Conserved_Rice_miPs.xlsx]

## Sheet: Sheet1
miP ID	Target ID	PCC	p-val
LOC_Os01g47600	LOC_Os01g08970	0.796309	1.14098e-06
LOC_Os02g42710	LOC_Os02g49070	0.905967	1.93816e-10
LOC_Os05g22730	LOC_Os04g59440	0.900247	3.81919e-10
LOC_Os05g45440	LOC_Os01g64300	-0.890257	1.13836e-09
LOC_Os01g59970	LOC_Os02g12740	0.717572	3.68735e-05
LOC_Os11g40600	LOC_Os01g64960	0.865245	1.16978e-08
LOC_Os12g29570	LOC_Os04g59440	0.906443	1.82825e-10
LOC_Os02g03710	LOC_Os04g38750	0.897888	4.99271e-10
LOC_Os04g33560	LOC_Os12g41860	-0.796287	1.14231e-06
LOC_Os01g58140	LOC_Os06g12960	0.781534	2.43449e-06
LOC_Os02g06700	LOC_Os03g26860	0.770858	4.06445e-06
LOC_Os06g09920	LOC_Os07g22510	0.773953	3.51316e-06
LOC_Os06g02490	LOC_Os04g58550	0.776734	3.07585e-06
LOC_Os04g47690	LOC_Os01g08970	0.72584	2.70749e-05
LOC_Os10g06690	LOC_Os07g43180	0.846475	5.0533e-08
LOC_Os08g44660	LOC_Os07g38120	-0.782365	2.33646e-06
LOC_Os04g58970	LOC_Os07g19470	0.821838	2.63457e-07
LOC_Os01g19740	LOC_Os03g03720	0.987847	6.43949e-21
LOC_Os08g35110	LOC_Os09g26610	0.769318	4.36659e-06
LOC_Os09g34020	LOC_Os05g02510	-0.880466	3.01282e-09
LOC_Os08g09380	LOC_Os02g21240	0.812889	4.51568e-07
LOC_Os10g41710	LOC_Os06g09679	0.749473	1.05066e-05
LOC_Os02g33820	LOC_Os01g73250	0.79627	1.14334e-06
LOC_Os07g41410	LOC_Os01g23850	0.703371	6.11873e-05
LOC_Os09g24540	LOC_Os07g48810	0.745573	1.2369e-05
LOC_Os02g36530	LOC_Os10g25210	0.840751	7.59981e-08
LOC_Os11g06720	LOC_Os01g73250	0.780786	2.52577e-06
LOC_Os03g61019	LOC_Os03g13590	0.860028	1.794e-08
LOC_Os02g37430	LOC_Os09g32450	0.859196	1.91763e-08
LOC_Os02g03020	LOC_Os01g59360	-0.941125	8.45916e-13
LOC_Os02g38386	LOC_Os11g10770	0.787224	1.83103e-06
LOC_Os06g48310	LOC_Os03g61990	-0.821565	2.67938e-07
LOC_Os08g04440	LOC_Os08g09350	0.840299	7.84364e-08
LOC_Os05g32860	LOC_Os02g15660	-0.723663	2.93998e-05
LOC_Os03g53540	LOC_Os02g13620	0.872968	6.00571e-09
LOC_Os04g47260	LOC_Os12g18360	-0.714043	4.19351e-05
LOC_Os07g30990	LOC_Os05g51230	0.807747	6.07652e-07
LOC_Os06g50230	LOC_Os02g56040	0.880243	3.07727e-09
LOC_Os10g39920	LOC_Os07g01730	0.730932	2.2262e-05
LOC_Os11g10620	LOC_Os11g10550	-0.923796	1.70822e-11
LOC_Os01g16210	LOC_Os10g41083	0.734477	1.93765e-05
LOC_Os12g12170	LOC_Os08g36480	0.749375	1.05502e-05
LOC_Os08g02420	LOC_Os12g07230	0.714006	4.19913e-05
LOC_Os10g10540	LOC_Os04g03579	0.799387	9.6683e-07
LOC_Os01g64360	LOC_Os05g37730	-0.882459	2.48872e-09
LOC_Os02g53880	LOC_Os07g22510	0.970819	2.16837e-16
LOC_Os02g53950	LOC_Os07g22510	0.72361	2.94588e-05
LOC_Os03g19380	LOC_Os03g03720	0.940603	9.37898e-13
LOC_Os03g01230	LOC_Os03g60130	0.756752	7.68691e-06
LOC_Os05g49080	LOC_Os07g02800	0.703358	6.12159e-05
LOC_Os06g47220	LOC_Os05g28840	0.801193	8.76133e-07
LOC_Os05g40190	LOC_Os12g18360	-0.823226	2.41697e-07
LOC_Os01g39780	LOC_Os01g61180	-0.876429	4.39203e-09
LOC_Os01g07376	LOC_Os12g18360	0.719264	3.46456e-05
LOC_Os02g53870	LOC_Os07g22510	0.800907	8.89975e-07
LOC_Os11g41860	LOC_Os02g21240	0.83077	1.4926e-07
